# Supplementary material for: Dietary zinc deficiency fuels esophageal cancer development by inducing a distinct inflammatory signature
Source: Springer Nature journal article supplement (doi:10.1038/onc.2011.592), 2011-12-19
Supplement: 41388_2012_BFonc2011592_MOESM6_ESM.pdf [file 41388_2012_BFonc2011592_MOESM6_ESM.pdf]

**Supplementary table 1.** Differentially expressed genes in ZD vs ZS esophagus obtained by comparing profile of ZD esophagus at tumor endpoint vs profile at 6 wks of ZD diet (without NMBA) (Dataset 3a), and profile of ZS esophagus at tumor endpoint vs profile at 6 wks of ZS diet (without NMBA) (Dataset 3b) (cutoff point:  $P < 0.05$  and fold difference  $\geq 4.0$ ). Inflammation genes from Table 1 are highlighted in yellow.

**The following 171 genes are upregulated ONLY in the ZD esophagus**

|       |           |          |           |            |            |            |
|-------|-----------|----------|-----------|------------|------------|------------|
| [1]   | Cxcl6     | Il17f    | Slc6a14   | Cxcl2      | Ly6b       | Lcn2       |
| [7]   | Il1b      | Ptgs2    | C3        | Slfn3      | Tcrb       | Ly6c       |
| [13]  | Cfb       | Lilrb4   | Ear11     | Rgs1       | Trat1      | Klk6       |
| [19]  | Cxcl1     | Krt17    | Plscr1    | Aif1       | Ms4a7      | Igsf6      |
| [25]  | Car2      | Apobec1  | Ptprc     | Pla2g2a    | Rgd1562855 | Lcp1       |
| [31]  | Sla       | Cfi      | Psmb9     | Ptgs2      | Icos       | Cd69       |
| [37]  | GOS2      | Sstr2    | Ifitm1    | Cd3d       | Csf3r      | Lat        |
| [43]  | Cxcr4     | Plek     | Rt1-dbl   | Ltb        | Alpl       | Prss22     |
| [49]  | Snx10     | Lck      | Nat81     | Lgals3bp   | Aldh1a3    | Ccr1       |
| [55]  | Pkib      | Clec7a   | Gbp2      | Fmo5       | Siglec5    | Igg-2a     |
| [61]  | P2ry10    | Ccr5     | Rhoh      | Loc687856  | Ccr6       | Psmb8      |
| [67]  | C4b       | Runx1    | Ggt1      | Plac8      | Rac2       | Itgal      |
| [73]  | Arhgap9   | Il18r1   | Cd3e      | Cybb       | Ptpro      | Rgd1562622 |
| [79]  | Prex1     | Tnfrsf14 | Cebpd     | Ptprcap    | Irf1       | Clec4a3    |
| [85]  | Hcst      | Slc5a5   | Kcnh1     | Sod2       | Ms4a11     | Pde4b      |
| [91]  | Il22ra2   | Hal      | Mgc108823 | Igtp       | Sele       | Il7r       |
| [97]  | Fcer1g    | Gpsm3    | Sit1      | S100a4     | Batf       | Vwal       |
| [103] | Hck       | Tyrobp   | Plxnc1    | Igj        | Cd2        | Clec9a     |
| [109] | Pon3      | Prss27   | H2-ea     | Tlr2       | Ccr2       | Lpxn       |
| [115] | Evi2a     | Lyz2     | Srgn      | Serping1   | Bst1       | Elavl2     |
| [121] | Ifitm3    | Cd37     | Ptpn22    | Tnfaip2    | Ddah1      | Gzmb       |
| [127] | Cd96      | Myo1g    | Tm6Sf1    | Cyba       | Nfkb1      | Satb1      |
| [133] | Runx1t1   | Plaur    | Tubb2b    | Ceacam1    | Serpina3n  | Cpxm1      |
| [139] | Ctse      | Gimap4   | Laptm5    | Dapp1      | Fam26f     | Hla-dmb    |
| [145] | Lcp2      | Napsa    | Loc685020 | Klrld1     | Cd74       | Clqa       |
| [151] | Mgc112715 | Chst5    | Slamf9    | Rgd1308221 | Il2rb      | Ctsz       |
| [157] | Glpr1     | Sh3bp2   | Alox5ap   | Fgr        | Itgb2      | Ppp1r3b    |
| [163] | Cfd       | Lpl      | Tgm5      | Socs1      | Ubd        | Mpeg1      |
| [169] | Emr1      | Ppp1R3d  | Vcam1     |            |            |            |

**The following 62 genes are upregulated ONLY in the ZS esophagus**

|      |            |            |           |          |         |            |
|------|------------|------------|-----------|----------|---------|------------|
| [1]  | Mcpt1      | Mcpt10     | Gja1      | Krtap141 | Actr3   | Rgd1565095 |
| [7]  | App        | Stfa213    | Il1a      | Scd      | Mal2    | Ppp3r1     |
| [13] | Mcpt9      | Tm9Sf3     | Pfn2      | Ppp2r1a  | Hdac1   | Ttc39b     |
| [19] | Bspry      | Cast       | Tmprss11d | Ccl2     | Max     | Bst2       |
| [25] | Fcer1a     | Xiap       | Aamp      | Atpla1   | Il13ra1 | Scamp2     |
| [31] | Rgd1563441 | Osbp12     | Cited4    | Ifngr2   | Krt5    | Akirin2    |
| [37] | Ssr3       | Stx6       | Sptlcl    | Il1rn    | Eif4h   | Rgd1559871 |
| [43] | Slc30a1    | Rad23b     | Slc9a3r1  | Mbnl2    | Chp     | Rap2b      |
| [49] | Slc5a1     | Rgd1565496 | Osbp11a   | Tmem86a  | Gmps    | Vapb       |
| [55] | Efhd2      | Tiparp     | Mat2a     | Por      | Elov15  | Loc679612  |
| [61] | Cpm        | Tnfsf13    |           |          |         |            |

**The following 23 genes are upregulated in BOTH ZD and ZS esophagus**

|      |           |            |        |        |            |       |
|------|-----------|------------|--------|--------|------------|-------|
| [1]  | S100a9    | Ceacam10   | Uox    | Lpo    | Rgd1311300 | Lgi2  |
| [7]  | Loc683295 | Ccb11      | Chi3L1 | Cd3g   | Cst7       | Cd53  |
| [13] | Bcl2a1d   | Rgd1566254 | Spn    | Coro1a | Mcpt2      | Il2rg |
| [19] | Zc3h12a   | Rt1-ba     | S100a8 | Gch1   | Ccl17      |       |

**The following 51 genes are downregulated ONLY in the ZD esophagus**

|      |            |            |            |           |           |            |
|------|------------|------------|------------|-----------|-----------|------------|
| [1]  | Rgd1562234 | Rgd1559748 | Slurp1     | Loc687873 | Loc685652 | Tmigd1     |
| [7]  | Dapl1      | Mboat2     | Asah2      | Ivl       | Apeg3     | Prss35     |
| [13] | Rgd1562107 | Gpha2      | Hsd17b2    | Egf       | Aldh1a1   | Tmem45a    |
| [19] | Arg1       | Ttc30b     | Akr1c18    | Gdpd2     | Acer1     | Grxcr1     |
| [25] | Atf3       | Wnk4       | Rgd1308195 | Per2      | Cyp26b1   | Yc2        |
| [31] | Sftpc      | Rbp7       | Maff       | Hells     | Ugt8      | Abat       |
| [37] | Zrsr1      | Cyp2j4     | Ifit2      | Tlcd1     | Loc689678 | Krt23      |
| [43] | Rgd1310693 | Gadd45b    | Pparg      | Akr7a3    | Ttpa      | Rgd1564833 |
| [49] | Lgi3       | Ggh        | Lynx1      |           |           |            |

**The following 9 genes are downregulated ONLY in the ZS esophagus**

|     |           |       |        |       |       |      |
|-----|-----------|-------|--------|-------|-------|------|
| [1] | Cdt1      | Mcm6  | Zfp451 | Dscc1 | Pole2 | Mcm2 |
| [7] | Loc367994 | Orc11 | Nr2f2  |       |       |      |
