# Supplementary material for: Dietary zinc deficiency fuels esophageal cancer development by inducing a distinct inflammatory signature
Source: Springer Nature journal article supplement (doi:10.1038/onc.2011.592), 2011-12-19
Supplement: 41388_2012_BFonc2011592_MOESM7_ESM.pdf [file 41388_2012_BFonc2011592_MOESM7_ESM.pdf]

**Dataset 1a** Expression profile of neoplastic ZD *versus* ZS esophagus at tumor endpoint after 3 NMBA doses (cutoff point: q-value < 5% and ≥ 2-fold difference)

Inflammatory probe sets denoted in Table 1 are highlighted in yellow.

| 751 Up-regulated probe sets associated with ZD | Affymetrix Probe ID* | Score (d) | Numerator (r) | Denominator (s+s0) | Fold-Change** | q-value(%) |
|------------------------------------------------|----------------------|-----------|---------------|--------------------|---------------|------------|
| Cxcl5                                          | 1387648_at           | 4.9625    | 6.0645        | 1.2221             | 83.92         | 0.00       |
| Ptgs2 (Cox-2)                                  | 1368527_at           | 3.1687    | 4.7179        | 1.4889             | 40.70         | 0.00       |
| Cxcl2                                          | 1368760_at           | 3.6976    | 4.8212        | 1.3039             | 37.90         | 0.00       |
| Ly6b                                           | 1370401_at           | 4.4153    | 4.9591        | 1.1231             | 35.04         | 0.00       |
| NA                                             | 1379497_at           | 2.8833    | 4.6967        | 1.6289             | 32.38         | 0.00       |
| Ca2                                            | 1386922_at           | 3.9457    | 4.9828        | 1.2628             | 32.09         | 0.00       |
| Ifit3                                          | 1376908_at           | 2.9034    | 4.2121        | 1.4507             | 31.72         | 0.00       |
| Ca2                                            | 1367733_at           | 3.8101    | 4.8290        | 1.2674             | 27.95         | 0.00       |
| NA                                             | 1392736_at           | 3.0667    | 4.3565        | 1.4206             | 19.36         | 0.00       |
| NA                                             | 1391505_x_at         | 2.2618    | 3.6428        | 1.6106             | 18.89         | 0.00       |
| Ceacam1                                        | 1382975_at           | 3.2856    | 3.7562        | 1.1432             | 14.06         | 0.00       |
| NA                                             | 1397900_at           | 3.1340    | 3.5574        | 1.1351             | 13.95         | 0.00       |
| Sifn3                                          | 1387134_at           | 2.5136    | 3.3395        | 1.3286             | 13.45         | 0.00       |
| Ceacam1                                        | 1374620_at           | 3.1334    | 3.5774        | 1.1417             | 12.22         | 0.00       |
| Csf3r_predicted                                | 1386009_at           | 2.1487    | 3.0290        | 1.4097             | 12.08         | 0.00       |
| Il1b                                           | 1398256_at           | 2.5817    | 3.3319        | 1.2906             | 11.87         | 0.00       |
| Gp49b                                          | 1375917_at           | 2.3994    | 3.1280        | 1.3037             | 11.86         | 0.00       |
| C3                                             | 1368000_at           | 3.4879    | 3.4219        | 0.9811             | 10.76         | 0.00       |
| Sell                                           | 1369801_at           | 1.3213    | 2.2055        | 1.6691             | 10.29         | 0.09       |
| NA                                             | 1398576_at           | 1.7345    | 2.6045        | 1.5016             | 10.03         | 0.03       |
| Ly6a_predicted                                 | 1378690_at           | 0.8960    | 1.7617        | 1.9663             | 10.03         | 0.70       |
| Acvr1                                          | 1394503_at           | 3.8757    | 3.3271        | 0.8585             | 9.97          | 0.00       |
| G0s2                                           | 1388395_at           | 2.0554    | 2.8196        | 1.3718             | 9.79          | 0.00       |
| NA                                             | 1373053_at           | 1.5294    | 2.4826        | 1.6233             | 9.53          | 0.03       |
| Best5                                          | 1370913_at           | 1.6825    | 2.4525        | 1.4577             | 9.34          | 0.03       |
| Nfe2                                           | 1375040_at           | 0.9637    | 1.7040        | 1.7681             | 9.05          | 0.56       |
| NA                                             | 1377774_at           | 1.6327    | 2.6036        | 1.5947             | 9.03          | 0.03       |
| CxCl3 (Gm1960)                                 | 1370633_at           | 1.7393    | 2.5028        | 1.4389             | 8.94          | 0.03       |
| Cldn10_predicted                               | 1370967_at           | 1.7117    | 2.6545        | 1.5508             | 8.91          | 0.03       |
| NA                                             | 1374236_at           | 3.0280    | 3.2366        | 1.0689             | 8.73          | 0.00       |
| G1p2_predicted                                 | 1382314_at           | 1.3977    | 2.1487        | 1.5374             | 8.52          | 0.07       |
| NA                                             | 1373536_at           | 2.4350    | 3.1372        | 1.2883             | 8.03          | 0.00       |
| RGD1305719_predicted                           | 1380107_a_at         | 3.3650    | 2.9603        | 0.8797             | 7.98          | 0.00       |
| LOC683295                                      | 1373349_at           | 2.6457    | 3.2302        | 1.2209             | 7.85          | 0.00       |
| Csf3                                           | 1369529_at           | 1.6956    | 2.4274        | 1.4316             | 7.84          | 0.03       |
| NA                                             | 1389754_at           | 2.8773    | 2.9019        | 1.0086             | 7.81          | 0.00       |
| Elavl2                                         | 1383768_at           | 2.2468    | 2.7054        | 1.2041             | 7.73          | 0.00       |
| Cfb                                            | 1389470_at           | 3.1905    | 2.9042        | 0.9103             | 7.59          | 0.00       |
| Il17f                                          | 1377264_at           | 1.7583    | 3.0364        | 1.7269             | 7.51          | 0.03       |
| RGD1565606_predicted                           | 1372915_at           | 2.7192    | 2.7868        | 1.0248             | 7.46          | 0.00       |
| Cxcl1                                          | 1387316_at           | 1.5808    | 2.4443        | 1.5462             | 7.34          | 0.03       |
| Ccr1                                           | 1370083_at           | 1.8173    | 2.3926        | 1.3166             | 7.26          | 0.00       |
| IgG-2a                                         | 1370394_at           | 2.6162    | 2.7365        | 1.0460             | 6.99          | 0.00       |
| Lilrb3                                         | 1370493_a_at         | 1.3147    | 2.0506        | 1.5597             | 6.88          | 0.09       |
| Fibp                                           | 1385107_at           | 2.3449    | 3.0975        | 1.3209             | 6.86          | 0.00       |
| Tnrc9_predicted                                | 1376352_at           | 1.3988    | 2.0301        | 1.4513             | 6.85          | 0.07       |
| Il22ra2                                        | 1391612_at           | 2.6206    | 2.8566        | 1.0901             | 6.85          | 0.00       |

|                      |              |        |        |        |      |      |
|----------------------|--------------|--------|--------|--------|------|------|
| Elavl2               | 1383736_at   | 2.2686 | 2.5758 | 1.1354 | 6.73 | 0.00 |
| Bst1                 | 1369294_at   | 1.8580 | 2.3416 | 1.2603 | 6.71 | 0.00 |
| NA                   | 1383469_at   | 2.6091 | 2.6537 | 1.0171 | 6.69 | 0.00 |
| Apobec1              | 1368270_at   | 2.5727 | 2.6274 | 1.0213 | 6.57 | 0.00 |
| Ear11                | 1370777_at   | 2.4612 | 2.7791 | 1.1292 | 6.46 | 0.00 |
| Ly6c                 | 1370056_at   | 2.2586 | 2.5767 | 1.1408 | 6.46 | 0.00 |
| NA                   | 1375422_at   | 1.0809 | 1.8964 | 1.7544 | 6.36 | 0.29 |
| Clca2                | 1384784_at   | 1.5276 | 2.2123 | 1.4482 | 6.22 | 0.03 |
| Igsf6                | 1387687_at   | 2.3817 | 2.5219 | 1.0589 | 6.13 | 0.00 |
| Cfi                  | 1368205_at   | 2.7188 | 2.5957 | 0.9547 | 6.09 | 0.00 |
| CxCl3 (Gm1960)       | 1370634_x_at | 1.5917 | 2.1052 | 1.3226 | 6.08 | 0.03 |
| Ceacam1              | 1369854_a_at | 2.2173 | 2.4686 | 1.1133 | 6.00 | 0.00 |
| Cxcr4                | 1370097_a_at | 2.0035 | 2.3452 | 1.1705 | 5.99 | 0.00 |
| LOC500180            | 1387902_a_at | 2.1628 | 2.5445 | 1.1765 | 5.96 | 0.00 |
| Ggt1                 | 1368374_a_at | 2.2065 | 2.4482 | 1.1096 | 5.96 | 0.00 |
| Lcn2                 | 1387011_at   | 1.8642 | 2.7387 | 1.4691 | 5.85 | 0.00 |
| Tlr2                 | 1392280_at   | 1.7736 | 2.1701 | 1.2236 | 5.70 | 0.03 |
| LOC685912            | 1385686_at   | 2.1989 | 2.5543 | 1.1616 | 5.66 | 0.00 |
| Ka17                 | 1397645_at   | 2.0120 | 2.7473 | 1.3655 | 5.58 | 0.00 |
| RGD1565140_predicted | 1382692_at   | 1.9720 | 2.2342 | 1.1330 | 5.54 | 0.00 |
| Siglec5_predicted    | 1385465_at   | 1.8185 | 2.5028 | 1.3763 | 5.46 | 0.00 |
| NA                   | 1377705_at   | 1.6577 | 2.1666 | 1.3070 | 5.42 | 0.03 |
| Slc5a5               | 1369020_at   | 2.3778 | 2.4968 | 1.0501 | 5.41 | 0.00 |
| F2rl2                | 1384165_at   | 0.9881 | 1.5253 | 1.5438 | 5.39 | 0.43 |
| Adfp                 | 1390383_at   | 2.4111 | 2.3255 | 0.9645 | 5.28 | 0.00 |
| NA                   | 1384946_at   | 1.9344 | 2.1603 | 1.1168 | 5.25 | 0.00 |
| RGD1310958_predicted | 1391058_at   | 2.7094 | 2.3296 | 0.8598 | 5.15 | 0.00 |
| Tmem58_predicted     | 1392285_at   | 1.7468 | 2.1186 | 1.2128 | 5.13 | 0.03 |
| LOC688030            | 1378024_at   | 2.4499 | 2.3463 | 0.9577 | 5.11 | 0.00 |
| Cxcr4                | 1373661_a_at | 1.9966 | 2.1838 | 1.0938 | 5.06 | 0.00 |
| Anxa1                | 1394451_at   | 1.8176 | 2.1743 | 1.1963 | 5.05 | 0.00 |
| RGD1560676_predicted | 1393978_at   | 2.1961 | 2.3336 | 1.0626 | 5.01 | 0.00 |
| Cxcr4                | 1389244_x_at | 2.0334 | 2.1646 | 1.0645 | 4.97 | 0.00 |
| Dcir3                | 1389553_at   | 2.3743 | 2.2704 | 0.9562 | 4.91 | 0.00 |
| LOC685479            | 1389773_at   | 2.3132 | 2.2902 | 0.9900 | 4.89 | 0.00 |
| Slc16a3              | 1368965_at   | 1.3434 | 1.7859 | 1.3294 | 4.88 | 0.09 |
| Fos                  | 1375043_at   | 1.6967 | 2.1480 | 1.2660 | 4.86 | 0.03 |
| Pglyrp1              | 1387422_at   | 0.9803 | 1.4567 | 1.4860 | 4.81 | 0.43 |
| LOC690164            | 1384329_at   | 2.6902 | 2.2718 | 0.8445 | 4.80 | 0.00 |
| NA                   | 1382173_at   | 2.2792 | 2.1824 | 0.9575 | 4.78 | 0.00 |
| LOC684841            | 1380888_at   | 1.9420 | 2.0826 | 1.0724 | 4.63 | 0.00 |
| Cebpd                | 1368813_at   | 2.0525 | 2.1320 | 1.0388 | 4.60 | 0.00 |
| Ms4a7_predicted      | 1378193_at   | 1.9610 | 2.1727 | 1.1079 | 4.54 | 0.00 |
| Birc3                | 1370113_at   | 2.1167 | 2.2696 | 1.0723 | 4.52 | 0.00 |
| Sstr2                | 1368782_at   | 2.0361 | 2.3388 | 1.1487 | 4.48 | 0.00 |
| NA                   | 1377706_x_at | 1.4428 | 1.8432 | 1.2775 | 4.45 | 0.06 |
| RT1-CE5              | 1371209_at   | 0.4360 | 0.9805 | 2.2489 | 4.39 | 4.47 |
| RGD1560851_predicted | 1373902_at   | 2.4455 | 2.0944 | 0.8564 | 4.35 | 0.00 |
| RGD1560925_predicted | 1374375_at   | 1.0763 | 1.5182 | 1.4105 | 4.25 | 0.29 |
| Igh-1a               | 1388272_at   | 1.1809 | 1.5695 | 1.3291 | 4.23 | 0.14 |
| RT1-CE5              | 1388255_x_at | 0.7165 | 1.3141 | 1.8341 | 4.22 | 1.53 |
| Ccr2                 | 1387742_at   | 2.1139 | 2.0337 | 0.9621 | 4.20 | 0.00 |
| Lilrb3               | 1370682_at   | 1.5645 | 1.8142 | 1.1596 | 4.19 | 0.03 |
| Snx10                | 1383585_s_at | 2.1293 | 2.0413 | 0.9587 | 4.16 | 0.00 |
| Plat                 | 1367800_at   | 2.0696 | 2.1377 | 1.0329 | 4.14 | 0.00 |

|                      |              |        |        |        |      |      |
|----------------------|--------------|--------|--------|--------|------|------|
| Tmem58_predicted     | 1373486_at   | 1.6682 | 1.8818 | 1.1280 | 4.14 | 0.03 |
| Mmp9                 | 1398275_at   | 1.5019 | 1.7648 | 1.1751 | 4.14 | 0.03 |
| Alpl                 | 1368139_s_at | 2.0725 | 2.0720 | 0.9998 | 4.12 | 0.00 |
| Pcdhb21_predicted    | 1388340_at   | 2.0446 | 2.0652 | 1.0101 | 4.12 | 0.00 |
| RGD1311126_predicted | 1376668_at   | 2.1837 | 2.0124 | 0.9215 | 4.06 | 0.00 |
| Cebpd                | 1387343_at   | 2.3162 | 2.0240 | 0.8738 | 4.06 | 0.00 |
| Sele                 | 1388018_at   | 1.5732 | 1.9429 | 1.2350 | 4.04 | 0.03 |
| NA                   | 1378428_at   | 2.2444 | 1.9832 | 0.8836 | 4.02 | 0.00 |
| Lyn                  | 1368679_a_at | 2.1432 | 1.9557 | 0.9125 | 4.01 | 0.00 |
| Ca4                  | 1368437_at   | 1.4609 | 1.7390 | 1.1904 | 3.98 | 0.06 |
| Nppb                 | 1367616_at   | 1.2551 | 1.6043 | 1.2783 | 3.97 | 0.11 |
| LOC500420            | 1374953_at   | 2.2740 | 1.9629 | 0.8632 | 3.94 | 0.00 |
| NA                   | 1381127_at   | 1.3331 | 1.7535 | 1.3153 | 3.94 | 0.09 |
| Rrm2                 | 1389408_at   | 1.9225 | 1.9474 | 1.0130 | 3.91 | 0.00 |
| RGD1560812_predicted | 1383874_at   | 2.1653 | 2.0137 | 0.9300 | 3.90 | 0.00 |
| LOC687856            | 1394673_at   | 1.6609 | 1.7784 | 1.0708 | 3.89 | 0.03 |
| Areg                 | 1369871_at   | 1.8278 | 1.9048 | 1.0421 | 3.89 | 0.00 |
| Sass6_predicted      | 1392040_at   | 1.6529 | 1.7730 | 1.0727 | 3.78 | 0.03 |
| Rrm2                 | 1393848_at   | 1.7705 | 1.8711 | 1.0568 | 3.77 | 0.03 |
| Ldhb                 | 1382277_at   | 2.3643 | 1.9016 | 0.8043 | 3.77 | 0.00 |
| RGD1309350_predicted | 1377660_at   | 2.1976 | 1.9275 | 0.8771 | 3.77 | 0.00 |
| NA                   | 1383163_at   | 1.7522 | 1.8864 | 1.0766 | 3.73 | 0.03 |
| Nup133_predicted     | 1375071_at   | 1.8199 | 1.8218 | 1.0010 | 3.73 | 0.00 |
| Mad2l1_predicted     | 1398602_at   | 1.8072 | 1.8059 | 0.9993 | 3.72 | 0.00 |
| Ceacam1              | 1370371_a_at | 1.6277 | 2.1478 | 1.3195 | 3.70 | 0.03 |
| Hal                  | 1387307_at   | 1.4360 | 1.6948 | 1.1802 | 3.70 | 0.06 |
| Plac8_predicted      | 1371447_at   | 1.8583 | 1.7930 | 0.9648 | 3.70 | 0.00 |
| NA                   | 1376394_at   | 1.9343 | 1.8820 | 0.9730 | 3.69 | 0.00 |
| Plscr1               | 1369029_at   | 1.7872 | 1.8457 | 1.0327 | 3.68 | 0.03 |
| NA                   | 1392554_a_at | 1.8888 | 2.0320 | 1.0758 | 3.68 | 0.00 |
| Cd3e_predicted       | 1389997_at   | 2.0492 | 1.9175 | 0.9357 | 3.67 | 0.00 |
| NA                   | 1383111_at   | 1.6792 | 1.7341 | 1.0327 | 3.66 | 0.03 |
| Cftr                 | 1384960_at   | 1.8270 | 1.7983 | 0.9843 | 3.66 | 0.00 |
| Mtx2                 | 1391989_at   | 1.1929 | 1.4825 | 1.2428 | 3.66 | 0.14 |
| LOC24906             | 1369497_at   | 1.8291 | 1.8009 | 0.9846 | 3.65 | 0.00 |
| Scgb1a1              | 1367566_at   | 2.1020 | 1.8701 | 0.8896 | 3.64 | 0.00 |
| LOC687121            | 1384231_at   | 1.8787 | 1.8964 | 1.0094 | 3.61 | 0.00 |
| NA                   | 1380559_at   | 2.2587 | 1.8649 | 0.8256 | 3.60 | 0.00 |
| Cyr61                | 1368290_at   | 1.1529 | 1.5080 | 1.3079 | 3.60 | 0.16 |
| Socs3                | 1369584_at   | 1.0455 | 1.4030 | 1.3419 | 3.59 | 0.29 |
| Fcgr1                | 1393038_at   | 1.5714 | 1.6853 | 1.0725 | 3.57 | 0.03 |
| Sp110                | 1372930_at   | 1.6122 | 1.7268 | 1.0711 | 3.56 | 0.03 |
| Snx10                | 1379275_at   | 2.0956 | 1.8467 | 0.8812 | 3.54 | 0.00 |
| Ms4a11_predicted     | 1376390_at   | 1.7958 | 1.7538 | 0.9766 | 3.53 | 0.03 |
| NA                   | 1377092_at   | 1.3825 | 1.7741 | 1.2832 | 3.52 | 0.07 |
| Clecsf6              | 1382153_at   | 2.0496 | 1.8171 | 0.8865 | 3.52 | 0.00 |
| Adfp                 | 1390850_at   | 1.7949 | 1.7475 | 0.9736 | 3.51 | 0.03 |
| Rgs1                 | 1398540_at   | 2.1688 | 1.8283 | 0.8430 | 3.50 | 0.00 |
| Igha_mapped          | 1374334_at   | 1.0042 | 1.4129 | 1.4071 | 3.50 | 0.43 |
| Bpy2ip1_predicted    | 1374271_at   | 2.1501 | 1.7960 | 0.8353 | 3.49 | 0.00 |
| Hbb                  | 1367553_x_at | 1.6557 | 1.7596 | 1.0627 | 3.48 | 0.03 |
| Bcl2a1               | 1368482_at   | 1.9796 | 1.8379 | 0.9284 | 3.48 | 0.00 |
| Prom1                | 1368008_at   | 2.2336 | 1.7766 | 0.7954 | 3.46 | 0.00 |
| Cxcl14               | 1388485_at   | 1.8811 | 1.7614 | 0.9364 | 3.46 | 0.00 |
| Elf3                 | 1374119_at   | 2.1414 | 1.8189 | 0.8494 | 3.45 | 0.00 |

|                      |              |        |        |        |      |      |
|----------------------|--------------|--------|--------|--------|------|------|
| Iqgap1_predicted     | 1378028_at   | 1.7233 | 1.7054 | 0.9896 | 3.44 | 0.03 |
| Ttk_predicted        | 1379448_at   | 1.7521 | 1.7496 | 0.9986 | 3.43 | 0.03 |
| Ccr5                 | 1369290_at   | 1.5543 | 1.6486 | 1.0607 | 3.43 | 0.03 |
| Ddah1                | 1387111_at   | 1.9370 | 1.7533 | 0.9052 | 3.42 | 0.00 |
| CxCl3 (Gm1960)       | 1388032_a_at | 1.1404 | 1.4036 | 1.2309 | 3.42 | 0.16 |
| NA                   | 1385310_at   | 1.0383 | 1.3176 | 1.2691 | 3.41 | 0.29 |
| Pde4b                | 1369044_a_at | 1.3942 | 1.5604 | 1.1192 | 3.40 | 0.07 |
| NA                   | 1377994_at   | 1.7334 | 1.6871 | 0.9733 | 3.39 | 0.03 |
| Sult1b1              | 1387314_at   | 1.5993 | 1.6496 | 1.0314 | 3.38 | 0.03 |
| Batf_predicted       | 1382663_at   | 1.8883 | 1.8244 | 0.9661 | 3.37 | 0.00 |
| Ifitm1_predicted     | 1372013_at   | 2.0839 | 1.7632 | 0.8461 | 3.37 | 0.00 |
| Tcrb                 | 1388275_at   | 1.9753 | 1.8056 | 0.9141 | 3.36 | 0.00 |
| Lyz                  | 1370154_at   | 1.8153 | 1.7464 | 0.9620 | 3.35 | 0.00 |
| LOC686866            | 1384148_at   | 1.2720 | 1.4718 | 1.1571 | 3.35 | 0.11 |
| LOC362350            | 1370924_at   | 1.9798 | 1.7829 | 0.9005 | 3.32 | 0.00 |
| Mogat1_predicted     | 1385308_at   | 1.7856 | 1.6778 | 0.9396 | 3.32 | 0.03 |
| Cd3e_predicted       | 1379791_at   | 1.9829 | 1.7833 | 0.8993 | 3.31 | 0.00 |
| MGC72973             | 1371102_x_at | 1.7797 | 1.7109 | 0.9613 | 3.30 | 0.03 |
| Cst7_predicted       | 1382622_at   | 1.9706 | 1.7549 | 0.8906 | 3.29 | 0.00 |
| NA                   | 1376943_at   | 1.8261 | 1.7657 | 0.9669 | 3.28 | 0.00 |
| Asns                 | 1387925_at   | 1.7850 | 1.7336 | 0.9712 | 3.27 | 0.03 |
| Mcm6                 | 1371074_a_at | 1.8400 | 1.7804 | 0.9676 | 3.26 | 0.00 |
| NA                   | 1379698_at   | 1.4610 | 1.5420 | 1.0554 | 3.26 | 0.06 |
| NA                   | 1390890_at   | 1.7900 | 1.7831 | 0.9961 | 3.25 | 0.03 |
| Ddit4                | 1368025_at   | 1.4926 | 1.6422 | 1.1002 | 3.25 | 0.06 |
| Rgs8                 | 1374157_at   | 1.4536 | 1.5301 | 1.0526 | 3.25 | 0.06 |
| Vwa1                 | 1398380_at   | 2.0090 | 1.6878 | 0.8401 | 3.25 | 0.00 |
| RGD1562847_predicted | 1376688_a_at | 1.6339 | 1.6130 | 0.9872 | 3.23 | 0.03 |
| Cd38                 | 1368975_at   | 1.3898 | 1.5088 | 1.0856 | 3.22 | 0.07 |
| Cd3d                 | 1387472_at   | 1.9208 | 1.7273 | 0.8993 | 3.21 | 0.00 |
| Lpl                  | 1386965_at   | 1.8313 | 1.6456 | 0.8986 | 3.21 | 0.00 |
| LOC363198            | 1393158_at   | 1.5113 | 1.5915 | 1.0531 | 3.20 | 0.03 |
| Ptgds2               | 1368492_at   | 1.6056 | 1.6036 | 0.9988 | 3.20 | 0.03 |
| Cybb                 | 1369181_at   | 1.5477 | 1.6100 | 1.0403 | 3.19 | 0.03 |
| Lrg1                 | 1374626_at   | 1.3654 | 1.5088 | 1.1051 | 3.19 | 0.07 |
| Ass                  | 1370964_at   | 1.6550 | 1.6287 | 0.9841 | 3.18 | 0.03 |
| Cd53                 | 1368518_at   | 1.7904 | 1.6453 | 0.9190 | 3.16 | 0.03 |
| RGD1561144_predicted | 1394264_at   | 1.6522 | 1.7774 | 1.0757 | 3.16 | 0.03 |
| Oas1                 | 1371152_a_at | 0.6320 | 0.9319 | 1.4745 | 3.15 | 2.03 |
| LOC290071            | 1371016_at   | 1.7638 | 1.7714 | 1.0043 | 3.15 | 0.03 |
| MGC125004            | 1393791_at   | 1.6970 | 1.6379 | 0.9652 | 3.15 | 0.03 |
| Rnasel               | 1380425_at   | 1.5992 | 1.5650 | 0.9786 | 3.15 | 0.03 |
| Icos                 | 1370769_a_at | 1.8607 | 1.7069 | 0.9173 | 3.15 | 0.00 |
| Tubb2b               | 1388131_at   | 2.0349 | 1.6402 | 0.8060 | 3.15 | 0.00 |
| Cp                   | 1368420_at   | 1.8653 | 1.6612 | 0.8906 | 3.15 | 0.00 |
| Ctdsp1               | 1393180_at   | 0.9775 | 1.3190 | 1.3493 | 3.14 | 0.56 |
| RGD1306939           | 1377190_at   | 1.6402 | 1.5934 | 0.9715 | 3.14 | 0.03 |
| Pum2                 | 1382926_s_at | 1.5086 | 1.5914 | 1.0549 | 3.14 | 0.03 |
| NA                   | 1391979_at   | 1.6922 | 1.6201 | 0.9574 | 3.14 | 0.03 |
| Ccl6                 | 1389123_at   | 2.0524 | 1.6511 | 0.8044 | 3.12 | 0.00 |
| NA                   | 1396362_at   | 1.5687 | 1.5688 | 1.0001 | 3.12 | 0.03 |
| Cyp2c23              | 1367988_at   | 1.6756 | 1.6188 | 0.9661 | 3.12 | 0.03 |
| U2af2                | 1395614_at   | 0.9110 | 1.2056 | 1.3234 | 3.11 | 0.70 |
| LOC691783            | 1376710_at   | 1.7460 | 1.6469 | 0.9432 | 3.11 | 0.03 |
| Tmprss11d            | 1387620_a_at | 1.8952 | 1.6274 | 0.8587 | 3.11 | 0.00 |

|                      |              |        |        |        |      |      |
|----------------------|--------------|--------|--------|--------|------|------|
| RT1-Aw2              | 1371210_s_at | 0.8835 | 1.2490 | 1.4137 | 3.11 | 0.70 |
| NA                   | 1373932_at   | 1.7128 | 1.6292 | 0.9512 | 3.10 | 0.03 |
| P2ry13               | 1381771_at   | 1.8678 | 1.6229 | 0.8689 | 3.10 | 0.00 |
| Rplp1                | 1385220_at   | 1.6121 | 1.5861 | 0.9839 | 3.10 | 0.03 |
| Solt_predicted       | 1382419_at   | 1.6965 | 1.6432 | 0.9686 | 3.10 | 0.03 |
| Spetex-2C            | 1370147_at   | 1.4002 | 1.4814 | 1.0580 | 3.10 | 0.07 |
| Uox                  | 1387963_a_at | 1.2640 | 1.9713 | 1.5596 | 3.10 | 0.11 |
| Mad211_predicted     | 1376951_at   | 1.6132 | 1.5574 | 0.9654 | 3.10 | 0.03 |
| NA                   | 1398528_at   | 1.3263 | 1.5250 | 1.1498 | 3.10 | 0.09 |
| LOC246266            | 1387959_at   | 1.4774 | 1.5208 | 1.0294 | 3.09 | 0.06 |
| Itgb8_predicted      | 1377974_at   | 1.4141 | 1.4871 | 1.0517 | 3.08 | 0.07 |
| RGD1564982_predicted | 1381913_at   | 0.9447 | 1.3066 | 1.3831 | 3.08 | 0.56 |
| Cybb                 | 1379344_at   | 1.6773 | 1.5969 | 0.9521 | 3.08 | 0.03 |
| NA                   | 1397304_at   | 1.3469 | 1.4898 | 1.1061 | 3.08 | 0.09 |
| Sla                  | 1379766_at   | 1.8215 | 1.6265 | 0.8930 | 3.06 | 0.00 |
| Hba-a1               | 1370239_at   | 1.5433 | 1.6124 | 1.0447 | 3.05 | 0.03 |
| Hba-a1               | 1370240_x_at | 1.5236 | 1.6011 | 1.0509 | 3.03 | 0.03 |
| NA                   | 1383786_at   | 1.7550 | 1.5531 | 0.8849 | 3.02 | 0.03 |
| Ppp2r4_predicted     | 1395409_at   | 0.8189 | 1.2862 | 1.5706 | 3.02 | 1.05 |
| NA                   | 1376624_at   | 1.8056 | 1.6010 | 0.8866 | 3.01 | 0.00 |
| NA                   | 1369885_at   | 1.3944 | 1.4623 | 1.0487 | 3.01 | 0.07 |
| RGD1310784_predicted | 1391317_at   | 1.3799 | 1.6605 | 1.2033 | 3.01 | 0.07 |
| Pole2_predicted      | 1393982_at   | 1.6763 | 1.5877 | 0.9472 | 3.01 | 0.03 |
| RGD1561144_predicted | 1392444_at   | 1.8194 | 1.6332 | 0.8976 | 3.00 | 0.00 |
| Prp2                 | 1373006_at   | 1.6420 | 1.5598 | 0.9499 | 2.99 | 0.03 |
| Plek                 | 1390687_at   | 1.3853 | 1.4661 | 1.0583 | 2.98 | 0.07 |
| Aif1                 | 1368558_s_at | 1.7794 | 1.5599 | 0.8767 | 2.98 | 0.03 |
| NA                   | 1395944_at   | 1.5091 | 1.5209 | 1.0078 | 2.97 | 0.03 |
| Pank3_predicted      | 1391348_at   | 1.5932 | 1.5247 | 0.9570 | 2.97 | 0.03 |
| Ccl6                 | 1382106_at   | 1.3557 | 1.4381 | 1.0608 | 2.97 | 0.07 |
| Sod2                 | 1370172_at   | 1.6957 | 1.6264 | 0.9591 | 2.97 | 0.03 |
| Ltb                  | 1379499_at   | 1.4500 | 1.5113 | 1.0423 | 2.97 | 0.06 |
| Fmo5                 | 1383248_at   | 1.2050 | 1.4680 | 1.2183 | 2.96 | 0.14 |
| Napsa                | 1368521_at   | 1.4132 | 1.4639 | 1.0359 | 2.96 | 0.07 |
| Riok3_predicted      | 1393524_at   | 1.3578 | 1.4188 | 1.0449 | 2.96 | 0.07 |
| Pold2                | 1392647_at   | 1.5262 | 1.4833 | 0.9719 | 2.95 | 0.03 |
| Fgf13                | 1368114_at   | 1.7579 | 1.6153 | 0.9189 | 2.95 | 0.03 |
| Scgb1c1_predicted    | 1393436_at   | 1.6659 | 1.5155 | 0.9097 | 2.95 | 0.03 |
| RGD1566254_predicted | 1372585_at   | 1.7098 | 1.5319 | 0.8960 | 2.93 | 0.03 |
| Cd69                 | 1384837_at   | 1.7582 | 1.5754 | 0.8960 | 2.93 | 0.03 |
| NA                   | 1378507_at   | 1.7389 | 1.5833 | 0.9105 | 2.91 | 0.03 |
| LOC501736            | 1376675_at   | 1.1305 | 1.2847 | 1.1364 | 2.91 | 0.16 |
| NA                   | 1389006_at   | 1.6633 | 1.5141 | 0.9103 | 2.91 | 0.03 |
| NA                   | 1384027_a_at | 1.6588 | 1.5117 | 0.9113 | 2.90 | 0.03 |
| Msr2_predicted       | 1395126_at   | 1.4251 | 1.4433 | 1.0128 | 2.90 | 0.07 |
| Itgb2                | 1383131_at   | 1.4743 | 1.4382 | 0.9755 | 2.89 | 0.06 |
| Mcpt3                | 1388231_at   | 0.7627 | 1.1210 | 1.4698 | 2.89 | 1.34 |
| Noxo1_predicted      | 1379081_at   | 1.7751 | 1.5376 | 0.8662 | 2.89 | 0.03 |
| Socs1                | 1371252_at   | 1.1780 | 1.3509 | 1.1468 | 2.88 | 0.14 |
| Tacc3                | 1372886_at   | 1.5769 | 1.4940 | 0.9474 | 2.87 | 0.03 |
| Rhoc_predicted       | 1378930_a_at | 1.7832 | 1.4941 | 0.8379 | 2.87 | 0.03 |
| Fgr                  | 1368693_at   | 1.2990 | 1.3762 | 1.0594 | 2.86 | 0.09 |
| Blm_predicted        | 1382783_at   | 1.6770 | 1.5379 | 0.9171 | 2.86 | 0.03 |
| LOC680531            | 1383581_at   | 1.3215 | 1.4199 | 1.0745 | 2.85 | 0.09 |
| NA                   | 1384028_at   | 1.6167 | 1.4743 | 0.9119 | 2.85 | 0.03 |

|                      |              |        |        |        |      |      |
|----------------------|--------------|--------|--------|--------|------|------|
| Thrsp                | 1370150_a_at | 1.1160 | 1.2849 | 1.1514 | 2.85 | 0.16 |
| Catsper3_predicted   | 1377116_at   | 1.4441 | 1.4206 | 0.9838 | 2.85 | 0.06 |
| RGD1309007_predicted | 1391626_at   | 1.6821 | 1.5055 | 0.8950 | 2.84 | 0.03 |
| Selp                 | 1391946_at   | 1.3897 | 1.4423 | 1.0379 | 2.84 | 0.07 |
| Plaur                | 1387269_s_at | 0.9993 | 1.2078 | 1.2086 | 2.84 | 0.43 |
| LOC679298            | 1395044_at   | 1.3805 | 1.4085 | 1.0203 | 2.84 | 0.07 |
| Klf12_predicted      | 1385545_at   | 1.5427 | 1.4509 | 0.9405 | 2.84 | 0.03 |
| Ms4a6b               | 1390510_at   | 1.5752 | 1.4851 | 0.9428 | 2.83 | 0.03 |
| Slc26a4              | 1368193_at   | 1.2613 | 1.3546 | 1.0740 | 2.83 | 0.11 |
| RGD1561749_predicted | 1374805_at   | 1.6265 | 1.5472 | 0.9513 | 2.83 | 0.03 |
| Pctp                 | 1387058_at   | 1.6589 | 1.4586 | 0.8793 | 2.82 | 0.03 |
| NA                   | 1389696_at   | 1.6836 | 1.5229 | 0.9045 | 2.82 | 0.03 |
| Tk1                  | 1389858_at   | 1.3672 | 1.4333 | 1.0483 | 2.81 | 0.07 |
| Ccr6                 | 1393929_at   | 1.5771 | 1.5577 | 0.9877 | 2.81 | 0.03 |
| Samsn1               | 1369552_at   | 1.4248 | 1.4015 | 0.9836 | 2.81 | 0.07 |
| LOC499991            | 1385397_at   | 1.5683 | 1.4840 | 0.9462 | 2.81 | 0.03 |
| Upp1                 | 1372691_at   | 1.6024 | 1.4568 | 0.9091 | 2.80 | 0.03 |
| Slc16a1              | 1389223_at   | 1.9706 | 1.4812 | 0.7516 | 2.80 | 0.00 |
| Pnoc                 | 1368369_at   | 1.3748 | 1.3793 | 1.0033 | 2.80 | 0.07 |
| LOC500449            | 1382167_at   | 1.6615 | 1.5138 | 0.9111 | 2.79 | 0.03 |
| NA                   | 1396205_at   | 0.5416 | 0.8838 | 1.6320 | 2.78 | 3.14 |
| Pon3                 | 1384544_at   | 1.4369 | 1.4155 | 0.9851 | 2.78 | 0.06 |
| Cotl1_predicted      | 1388596_at   | 1.6657 | 1.4426 | 0.8661 | 2.78 | 0.03 |
| Icos                 | 1393329_at   | 1.6101 | 1.5543 | 0.9654 | 2.78 | 0.03 |
| Slamf9_predicted     | 1378443_at   | 1.6281 | 1.4400 | 0.8845 | 2.77 | 0.03 |
| RGD1559690_predicted | 1378906_at   | 1.2514 | 1.3208 | 1.0555 | 2.77 | 0.11 |
| NA                   | 1385925_at   | 1.2169 | 1.3185 | 1.0835 | 2.76 | 0.14 |
| Ctsc                 | 1397808_at   | 1.5840 | 1.4660 | 0.9255 | 2.76 | 0.03 |
| Cd96                 | 1382507_at   | 1.7123 | 1.5013 | 0.8768 | 2.76 | 0.03 |
| NA                   | 1392627_x_at | 1.3009 | 1.4062 | 1.0810 | 2.74 | 0.09 |
| Cdca2                | 1381833_at   | 1.4100 | 1.4066 | 0.9976 | 2.74 | 0.07 |
| Ccne1                | 1373530_at   | 1.5726 | 1.4436 | 0.9180 | 2.74 | 0.03 |
| St8sia4              | 1380616_at   | 1.3357 | 1.3657 | 1.0224 | 2.73 | 0.09 |
| LOC498335            | 1398390_at   | 1.6649 | 1.4464 | 0.8688 | 2.73 | 0.03 |
| NA                   | 1382472_at   | 1.4917 | 1.4055 | 0.9422 | 2.73 | 0.06 |
| Exo1_predicted       | 1385733_at   | 1.6468 | 1.4566 | 0.8845 | 2.73 | 0.03 |
| LOC500904            | 1391737_at   | 1.5584 | 1.4113 | 0.9056 | 2.72 | 0.03 |
| Lck                  | 1383320_at   | 1.6882 | 1.4882 | 0.8815 | 2.72 | 0.03 |
| Fcer2a               | 1391072_at   | 1.7404 | 1.4462 | 0.8310 | 2.72 | 0.03 |
| Tnnt2                | 1367592_at   | 1.3590 | 1.4462 | 1.0641 | 2.72 | 0.07 |
| Usp18                | 1389034_at   | 1.4102 | 1.3729 | 0.9736 | 2.72 | 0.07 |
| Dio2                 | 1385568_at   | 1.2693 | 1.3059 | 1.0288 | 2.71 | 0.11 |
| Runx1                | 1368914_at   | 1.5278 | 1.4613 | 0.9565 | 2.70 | 0.03 |
| RGD1560014_predicted | 1381556_at   | 1.6509 | 1.4149 | 0.8571 | 2.70 | 0.03 |
| NA                   | 1375230_at   | 1.1061 | 1.3609 | 1.2303 | 2.70 | 0.16 |
| RGD1565561_predicted | 1382776_at   | 1.8600 | 1.4389 | 0.7736 | 2.70 | 0.00 |
| Rap2a                | 1380243_at   | 1.6057 | 1.4061 | 0.8757 | 2.69 | 0.03 |
| Icos                 | 1368783_at   | 1.5828 | 1.4944 | 0.9441 | 2.69 | 0.03 |
| Itgb8_predicted      | 1395372_at   | 1.9185 | 1.4286 | 0.7447 | 2.69 | 0.00 |
| MGC72974             | 1380668_at   | 1.6113 | 1.4316 | 0.8884 | 2.69 | 0.03 |
| Fcnb                 | 1387378_at   | 1.2364 | 1.2871 | 1.0410 | 2.69 | 0.11 |
| Ptpn18               | 1373065_at   | 1.5439 | 1.3864 | 0.8980 | 2.68 | 0.03 |
| Ptprz1               | 1368350_at   | 1.6030 | 1.4700 | 0.9170 | 2.68 | 0.03 |
| RGD1304835           | 1391214_at   | 1.6282 | 1.4526 | 0.8921 | 2.68 | 0.03 |
| RGD1560812_predicted | 1394278_at   | 1.7121 | 1.4317 | 0.8362 | 2.68 | 0.03 |

|                       |              |        |        |        |      |      |
|-----------------------|--------------|--------|--------|--------|------|------|
| NA                    | 1390866_at   | 1.6473 | 1.3909 | 0.8444 | 2.68 | 0.03 |
| Reg3g                 | 1370631_at   | 1.0742 | 1.1997 | 1.1168 | 2.67 | 0.29 |
| Cast                  | 1391481_at   | 1.1222 | 1.2645 | 1.1268 | 2.67 | 0.16 |
| Abca1                 | 1394490_at   | 0.8963 | 1.1960 | 1.3344 | 2.67 | 0.70 |
| Angptl4               | 1388924_at   | 1.6028 | 1.3999 | 0.8734 | 2.67 | 0.03 |
| Ehbp1_predicted       | 1373217_at   | 1.4710 | 1.3678 | 0.9299 | 2.67 | 0.06 |
| Timeless              | 1368522_at   | 1.6117 | 1.4349 | 0.8903 | 2.66 | 0.03 |
| Ptpcr                 | 1370603_a_at | 1.3249 | 1.3495 | 1.0185 | 2.66 | 0.09 |
| Hck                   | 1369204_at   | 1.5040 | 1.3762 | 0.9150 | 2.66 | 0.03 |
| Got2                  | 1393167_at   | 1.0306 | 1.2205 | 1.1843 | 2.66 | 0.43 |
| Muc4                  | 1370926_at   | 0.9550 | 1.2011 | 1.2577 | 2.66 | 0.56 |
| NA                    | 1395442_at   | 1.6030 | 1.4167 | 0.8838 | 2.65 | 0.03 |
| Ptpcr                 | 1390798_at   | 1.5340 | 1.4165 | 0.9234 | 2.65 | 0.03 |
| Cd5                   | 1369025_at   | 1.6627 | 1.4198 | 0.8539 | 2.65 | 0.03 |
| Mcm3_predicted        | 1372406_at   | 1.5536 | 1.4219 | 0.9153 | 2.64 | 0.03 |
| Rs21c6                | 1370308_at   | 1.4761 | 1.3846 | 0.9381 | 2.64 | 0.06 |
| Orc1l                 | 1385522_at   | 1.3345 | 1.4438 | 1.0819 | 2.64 | 0.09 |
| Depdc1a_predicted     | 1376914_at   | 1.4051 | 1.3448 | 0.9571 | 2.63 | 0.07 |
| Scd1                  | 1370355_at   | 1.3577 | 1.4244 | 1.0491 | 2.63 | 0.07 |
| LOC498279             | 1373575_at   | 1.3144 | 1.3163 | 1.0014 | 2.63 | 0.09 |
| Soat1                 | 1374976_a_at | 1.3195 | 1.2871 | 0.9754 | 2.62 | 0.09 |
| Multiple Gene Symbols | 1392515_at   | 1.5810 | 1.4179 | 0.8968 | 2.62 | 0.03 |
| Susd3_predicted       | 1377351_at   | 1.3634 | 1.3169 | 0.9659 | 2.62 | 0.07 |
| NA                    | 1373110_at   | 1.2133 | 1.2834 | 1.0577 | 2.62 | 0.14 |
| Igtp                  | 1375796_at   | 1.2222 | 1.2504 | 1.0231 | 2.62 | 0.11 |
| Cd3g                  | 1384787_at   | 1.6083 | 1.4321 | 0.8904 | 2.61 | 0.03 |
| Kcnh1                 | 1396147_at   | 1.5225 | 1.4316 | 0.9403 | 2.61 | 0.03 |
| LOC499300             | 1372852_at   | 1.6111 | 1.4277 | 0.8862 | 2.61 | 0.03 |
| LOC680609             | 1391453_at   | 1.7348 | 1.3738 | 0.7919 | 2.61 | 0.03 |
| Mx1                   | 1371015_at   | 1.1557 | 1.2149 | 1.0513 | 2.60 | 0.16 |
| RGD1306734_predicted  | 1398618_s_at | 1.2457 | 1.2556 | 1.0080 | 2.59 | 0.11 |
| NA                    | 1390909_at   | 1.3738 | 1.3063 | 0.9509 | 2.59 | 0.07 |
| Cdc2a                 | 1367776_at   | 1.3509 | 1.3357 | 0.9887 | 2.59 | 0.09 |
| Psmb8                 | 1367786_at   | 1.5515 | 1.3952 | 0.8993 | 2.59 | 0.03 |
| Txnrd3_predicted      | 1374730_at   | 1.3870 | 1.3048 | 0.9408 | 2.59 | 0.07 |
| Pbk_predicted         | 1397341_at   | 1.4287 | 1.3528 | 0.9469 | 2.58 | 0.07 |
| Mphosph1_predicted    | 1380775_at   | 1.4173 | 1.3425 | 0.9472 | 2.58 | 0.07 |
| RGD1565734_predicted  | 1385781_at   | 1.3382 | 1.3298 | 0.9937 | 2.58 | 0.09 |
| Slc35e1_predicted     | 1374449_at   | 1.3453 | 1.3224 | 0.9830 | 2.57 | 0.09 |
| Rhoh                  | 1394122_at   | 1.2030 | 1.2626 | 1.0495 | 2.57 | 0.14 |
| RGD1304693_predicted  | 1390321_at   | 1.3802 | 1.3138 | 0.9519 | 2.57 | 0.07 |
| Ripk3                 | 1370422_at   | 1.2170 | 1.2445 | 1.0226 | 2.57 | 0.14 |
| Es2                   | 1371100_at   | 1.4862 | 1.3987 | 0.9411 | 2.56 | 0.06 |
| Lbp                   | 1387868_at   | 1.1420 | 1.2234 | 1.0713 | 2.56 | 0.16 |
| Cflar                 | 1379679_at   | 1.2289 | 1.2308 | 1.0015 | 2.56 | 0.11 |
| Mpeg1                 | 1369427_at   | 1.3293 | 1.2836 | 0.9657 | 2.55 | 0.09 |
| Tnfrsf14              | 1376327_at   | 1.3198 | 1.3329 | 1.0099 | 2.55 | 0.09 |
| LOC679150             | 1374544_at   | 1.3250 | 1.2815 | 0.9671 | 2.55 | 0.09 |
| Mgl1                  | 1368464_at   | 1.3805 | 1.3726 | 0.9942 | 2.55 | 0.07 |
| LOC685433             | 1389413_at   | 1.4561 | 1.4007 | 0.9619 | 2.55 | 0.06 |
| Rgs5                  | 1369957_at   | 1.4978 | 1.3203 | 0.8815 | 2.55 | 0.03 |
| P2ry13                | 1390849_at   | 1.5506 | 1.3549 | 0.8738 | 2.55 | 0.03 |
| Hcst                  | 1385440_at   | 1.5329 | 1.3716 | 0.8948 | 2.55 | 0.03 |
| Dusp1                 | 1368147_at   | 0.7882 | 1.0647 | 1.3507 | 2.54 | 1.24 |
| LOC682679             | 1389220_at   | 1.6242 | 1.3480 | 0.8299 | 2.54 | 0.03 |

|                      |              |        |        |        |      |      |
|----------------------|--------------|--------|--------|--------|------|------|
| NA                   | 1377671_at   | 1.3071 | 1.2756 | 0.9759 | 2.54 | 0.09 |
| NA                   | 1397728_at   | 1.5555 | 1.3369 | 0.8594 | 2.54 | 0.03 |
| Paics                | 1393751_at   | 1.0511 | 1.1669 | 1.1101 | 2.54 | 0.29 |
| Trerf1_predicted     | 1378617_at   | 1.6712 | 1.3422 | 0.8031 | 2.54 | 0.03 |
| NA                   | 1380822_at   | 1.5782 | 1.3603 | 0.8620 | 2.54 | 0.03 |
| Ctsz                 | 1370885_at   | 1.6442 | 1.3406 | 0.8154 | 2.53 | 0.03 |
| Dsc2                 | 1375936_at   | 1.4739 | 1.3225 | 0.8973 | 2.53 | 0.06 |
| RGD1562105_predicted | 1388940_at   | 1.2598 | 1.2492 | 0.9916 | 2.53 | 0.11 |
| Melk_predicted       | 1389756_at   | 1.2996 | 1.3224 | 1.0175 | 2.53 | 0.09 |
| Pls1_predicted       | 1389654_at   | 1.5473 | 1.3337 | 0.8620 | 2.52 | 0.03 |
| NA                   | 1384393_at   | 1.6338 | 1.3200 | 0.8079 | 2.52 | 0.03 |
| Ube2t_predicted      | 1390481_a_at | 1.5251 | 1.3140 | 0.8616 | 2.52 | 0.03 |
| Rnase6               | 1396065_at   | 1.4031 | 1.2787 | 0.9113 | 2.52 | 0.07 |
| Lpxn                 | 1378633_at   | 1.5746 | 1.3591 | 0.8631 | 2.52 | 0.03 |
| RGD1311681           | 1378418_at   | 1.4628 | 1.3418 | 0.9173 | 2.52 | 0.06 |
| Dpysl3               | 1388101_at   | 1.0820 | 1.1771 | 1.0880 | 2.52 | 0.29 |
| NA                   | 1389440_at   | 1.4114 | 1.3219 | 0.9366 | 2.51 | 0.07 |
| Slc39a10_predicted   | 1373677_at   | 1.4574 | 1.2807 | 0.8787 | 2.51 | 0.06 |
| NA                   | 1390415_at   | 1.3453 | 1.3155 | 0.9779 | 2.51 | 0.09 |
| LOC310968            | 1379748_at   | 0.8292 | 1.0464 | 1.2619 | 2.51 | 1.05 |
| Fcgr3a               | 1373523_at   | 1.2718 | 1.3605 | 1.0697 | 2.50 | 0.11 |
| Il2rg                | 1389092_at   | 1.4814 | 1.3516 | 0.9124 | 2.50 | 0.06 |
| RGD1561543_predicted | 1396194_at   | 1.0837 | 1.1945 | 1.1023 | 2.50 | 0.29 |
| Il2rb                | 1387394_at   | 1.4881 | 1.3732 | 0.9228 | 2.50 | 0.06 |
| Lcp2                 | 1370090_at   | 1.4455 | 1.3226 | 0.9150 | 2.50 | 0.06 |
| RT1-Aw2              | 1369110_x_at | 0.9899 | 1.1827 | 1.1947 | 2.50 | 0.43 |
| Fbxl4_predicted      | 1395301_x_at | 1.2328 | 1.2876 | 1.0444 | 2.49 | 0.11 |
| Nnmt_predicted       | 1379812_at   | 1.3119 | 1.2460 | 0.9497 | 2.49 | 0.09 |
| Thbs4                | 1388138_at   | 1.3886 | 1.3426 | 0.9669 | 2.49 | 0.07 |
| Itgal                | 1393347_at   | 1.2369 | 1.2669 | 1.0242 | 2.48 | 0.11 |
| Myo1b                | 1369720_at   | 1.4374 | 1.2906 | 0.8979 | 2.48 | 0.06 |
| Mipep                | 1397644_at   | 1.5102 | 1.2944 | 0.8571 | 2.47 | 0.03 |
| NA                   | 1382346_at   | 1.3959 | 1.2605 | 0.9030 | 2.47 | 0.07 |
| Ccr4                 | 1369555_at   | 1.4575 | 1.2729 | 0.8734 | 2.47 | 0.06 |
| NA                   | 1397704_at   | 1.3842 | 1.2987 | 0.9382 | 2.47 | 0.07 |
| LOC681870            | 1393816_at   | 1.2358 | 1.2731 | 1.0302 | 2.47 | 0.11 |
| NA                   | 1382431_at   | 0.7606 | 1.0198 | 1.3407 | 2.47 | 1.34 |
| Zap70                | 1393400_at   | 1.5768 | 1.3366 | 0.8477 | 2.46 | 0.03 |
| RGD1560293_predicted | 1385832_s_at | 1.5334 | 1.3347 | 0.8704 | 2.46 | 0.03 |
| Map4k1_predicted     | 1376255_at   | 1.4145 | 1.2592 | 0.8902 | 2.46 | 0.07 |
| LOC686432            | 1379783_at   | 1.4019 | 1.2589 | 0.8980 | 2.46 | 0.07 |
| Rnd1                 | 1381533_at   | 1.3111 | 1.3743 | 1.0482 | 2.46 | 0.09 |
| RGD1560812_predicted | 1383001_at   | 1.5351 | 1.3325 | 0.8681 | 2.45 | 0.03 |
| Klhl6_predicted      | 1377153_a_at | 1.5019 | 1.3059 | 0.8695 | 2.45 | 0.03 |
| Bub1_predicted       | 1385086_at   | 1.3134 | 1.2443 | 0.9474 | 2.44 | 0.09 |
| Mcm5_predicted       | 1376055_at   | 1.5149 | 1.3054 | 0.8617 | 2.44 | 0.03 |
| NA                   | 1376685_at   | 1.3954 | 1.2870 | 0.9223 | 2.44 | 0.07 |
| NA                   | 1383669_at   | 1.5850 | 1.2734 | 0.8034 | 2.44 | 0.03 |
| Ccl2                 | 1367973_at   | 0.8392 | 1.0806 | 1.2877 | 2.44 | 0.88 |
| RGD1561016_predicted | 1385696_at   | 0.9884 | 1.0784 | 1.0911 | 2.44 | 0.43 |
| Bche                 | 1387832_at   | 1.2151 | 1.2158 | 1.0006 | 2.44 | 0.14 |
| Klrb1b               | 1388069_at   | 1.0498 | 1.1223 | 1.0691 | 2.43 | 0.29 |
| MGC94782             | 1376106_at   | 1.4668 | 1.2567 | 0.8568 | 2.43 | 0.06 |
| Padi4                | 1387239_a_at | 1.0360 | 1.1289 | 1.0897 | 2.43 | 0.29 |
| MGC105830            | 1393669_at   | 0.4757 | 0.8213 | 1.7263 | 2.42 | 3.90 |



|                      |              |        |        |        |      |      |
|----------------------|--------------|--------|--------|--------|------|------|
| Cd37                 | 1368555_at   | 1.4500 | 1.2540 | 0.8648 | 2.42 | 0.06 |
| Rbclca2              | 1385784_at   | 1.1132 | 1.1497 | 1.0328 | 2.42 | 0.16 |
| Cul2_predicted       | 1387839_at   | 0.6602 | 0.9680 | 1.4662 | 2.42 | 1.73 |
| LOC681730            | 1370821_at   | 1.5480 | 1.2540 | 0.8101 | 2.41 | 0.03 |
| LOC680815            | 1393655_at   | 1.6190 | 1.2738 | 0.7868 | 2.41 | 0.03 |
| Gpsm3                | 1372200_at   | 1.3172 | 1.2384 | 0.9402 | 2.41 | 0.09 |
| Ccna2                | 1379582_a_at | 1.3733 | 1.2800 | 0.9320 | 2.41 | 0.07 |
| Igf1                 | 1370333_a_at | 1.3878 | 1.3303 | 0.9586 | 2.40 | 0.07 |
| NA                   | 1374298_at   | 1.1996 | 1.1835 | 0.9866 | 2.40 | 0.14 |
| MGC72614             | 1384617_at   | 1.1405 | 1.2338 | 1.0818 | 2.40 | 0.16 |
| Dedd                 | 1369003_at   | 1.0861 | 1.1788 | 1.0853 | 2.40 | 0.29 |
| Fgfbp1               | 1368349_at   | 1.4123 | 1.2434 | 0.8804 | 2.40 | 0.07 |
| Depdc1b_predicted    | 1390892_at   | 1.2003 | 1.1859 | 0.9879 | 2.40 | 0.14 |
| Kif23_predicted      | 1395828_at   | 1.3229 | 1.2175 | 0.9203 | 2.40 | 0.09 |
| Glpr1                | 1373504_at   | 1.3074 | 1.1953 | 0.9143 | 2.40 | 0.09 |
| Laptm5               | 1368006_at   | 1.3656 | 1.2503 | 0.9156 | 2.40 | 0.07 |
| LOC683295            | 1371757_s_at | 1.3930 | 1.3446 | 0.9652 | 2.39 | 0.07 |
| NA                   | 1386695_at   | 1.3185 | 1.3143 | 0.9968 | 2.39 | 0.09 |
| NA                   | 1379371_at   | 1.1897 | 1.2094 | 1.0165 | 2.39 | 0.14 |
| NA                   | 1398348_at   | 1.4409 | 1.2345 | 0.8568 | 2.39 | 0.06 |
| RGD1306894_predicted | 1395900_at   | 0.9644 | 1.0954 | 1.1359 | 2.38 | 0.56 |
| NA                   | 1378413_at   | 1.4461 | 1.2499 | 0.8643 | 2.38 | 0.06 |
| NA                   | 1378537_at   | 1.5428 | 1.2745 | 0.8260 | 2.38 | 0.03 |
| Sh3bp2               | 1384968_at   | 1.5245 | 1.2690 | 0.8324 | 2.38 | 0.03 |
| Nfil3                | 1368488_at   | 1.1985 | 1.1834 | 0.9874 | 2.38 | 0.14 |
| RGD1565540_predicted | 1389659_at   | 1.2031 | 1.2011 | 0.9984 | 2.38 | 0.14 |
| RT1-CE5              | 1370972_x_at | 1.0724 | 1.1272 | 1.0511 | 2.38 | 0.29 |
| Cd2                  | 1369190_at   | 1.4604 | 1.2822 | 0.8780 | 2.38 | 0.06 |
| MGC108823            | 1373992_at   | 1.2233 | 1.2358 | 1.0103 | 2.38 | 0.11 |
| Chrdl2_predicted     | 1393954_at   | 0.9912 | 1.0719 | 1.0814 | 2.38 | 0.43 |
| Spbc24_predicted     | 1373026_at   | 1.3393 | 1.2448 | 0.9295 | 2.38 | 0.09 |
| Slc4a8               | 1374095_at   | 1.3007 | 1.2238 | 0.9409 | 2.38 | 0.09 |
| Cdc20                | 1387895_s_at | 1.2026 | 1.1777 | 0.9794 | 2.37 | 0.14 |
| Gatm                 | 1367627_at   | 1.3170 | 1.2195 | 0.9259 | 2.37 | 0.09 |
| Hs3st1               | 1370834_at   | 1.4344 | 1.2465 | 0.8690 | 2.37 | 0.06 |
| RGD1308324_predicted | 1391236_at   | 1.4301 | 1.2326 | 0.8619 | 2.37 | 0.07 |
| Igf1                 | 1388469_at   | 1.3152 | 1.2892 | 0.9802 | 2.37 | 0.09 |
| NA                   | 1398590_at   | 1.3533 | 1.2004 | 0.8870 | 2.37 | 0.09 |
| RGD1307201_predicted | 1382459_at   | 1.2901 | 1.2130 | 0.9402 | 2.37 | 0.09 |
| Sfn2_predicted       | 1377916_at   | 1.4187 | 1.2155 | 0.8568 | 2.37 | 0.07 |
| NA                   | 1391518_at   | 1.3241 | 1.2056 | 0.9105 | 2.37 | 0.09 |
| C4a                  | 1370892_at   | 1.3581 | 1.3361 | 0.9837 | 2.36 | 0.07 |
| Plk4_predicted       | 1377832_at   | 1.3232 | 1.2154 | 0.9185 | 2.36 | 0.09 |
| Klrd1                | 1369306_at   | 1.1609 | 1.2182 | 1.0494 | 2.36 | 0.16 |
| Ctse                 | 1368167_at   | 1.4757 | 1.2630 | 0.8559 | 2.36 | 0.06 |
| Ctsc                 | 1384841_at   | 1.3501 | 1.2318 | 0.9123 | 2.36 | 0.09 |
| NA                   | 1377637_at   | 1.4037 | 1.2463 | 0.8879 | 2.35 | 0.07 |
| Mcm2_predicted       | 1374036_at   | 1.4120 | 1.2735 | 0.9019 | 2.35 | 0.07 |
| Arpc1b               | 1386925_at   | 1.4521 | 1.2194 | 0.8398 | 2.35 | 0.06 |
| Havcr1               | 1387965_at   | 1.4687 | 1.2153 | 0.8275 | 2.35 | 0.06 |
| RGD1306908           | 1382592_at   | 1.3519 | 1.1975 | 0.8858 | 2.35 | 0.09 |
| C2                   | 1383392_at   | 1.3454 | 1.2972 | 0.9641 | 2.35 | 0.09 |
| Cln4-2               | 1379932_at   | 1.5362 | 1.2182 | 0.7930 | 2.35 | 0.03 |
| Lgals3bp             | 1387946_at   | 1.3706 | 1.2255 | 0.8941 | 2.35 | 0.07 |
| LOC689064            | 1371245_a_at | 1.1196 | 1.4955 | 1.3358 | 2.34 | 0.16 |

|                      |            |        |        |        |      |      |
|----------------------|------------|--------|--------|--------|------|------|
| LOC683788            | 1394315_at | 0.9584 | 1.0701 | 1.1166 | 2.34 | 0.56 |
| LOC306464            | 1393844_at | 1.2843 | 1.1934 | 0.9292 | 2.34 | 0.09 |
| C1qa                 | 1376652_at | 1.2027 | 1.2379 | 1.0293 | 2.34 | 0.14 |
| Ocm                  | 1370477_at | 1.3475 | 1.2098 | 0.8978 | 2.34 | 0.09 |
| NA                   | 1379394_at | 1.4139 | 1.2000 | 0.8487 | 2.34 | 0.07 |
| MGC109491            | 1390042_at | 1.3850 | 1.2271 | 0.8860 | 2.34 | 0.07 |
| Agpat2_predicted     | 1374570_at | 1.4844 | 1.2088 | 0.8143 | 2.33 | 0.06 |
| Ramp3                | 1387389_at | 1.3242 | 1.1770 | 0.8888 | 2.33 | 0.09 |
| C1qb                 | 1370215_at | 1.1948 | 1.3018 | 1.0896 | 2.33 | 0.14 |
| Cdkn1a               | 1387391_at | 1.0092 | 1.0787 | 1.0689 | 2.33 | 0.43 |
| Marcks               | 1388157_at | 0.8178 | 0.9963 | 1.2183 | 2.33 | 1.05 |
| RGD1306658           | 1392579_at | 1.6172 | 1.2138 | 0.7506 | 2.33 | 0.03 |
| Ptpn22_predicted     | 1381357_at | 1.4460 | 1.2515 | 0.8655 | 2.33 | 0.06 |
| Arhgap9              | 1382026_at | 1.1781 | 1.1555 | 0.9808 | 2.32 | 0.14 |
| Blnk                 | 1393641_at | 1.6159 | 1.2216 | 0.7560 | 2.32 | 0.03 |
| Ttk_predicted        | 1397476_at | 1.1390 | 1.1623 | 1.0204 | 2.32 | 0.16 |
| Hmmr                 | 1370462_at | 1.2012 | 1.1562 | 0.9625 | 2.32 | 0.14 |
| RT1-Ba               | 1370822_at | 1.1760 | 1.1888 | 1.0109 | 2.32 | 0.14 |
| RGD1309534           | 1385359_at | 0.9055 | 1.0078 | 1.1130 | 2.32 | 0.70 |
| Cdkn2b               | 1369193_at | 1.3007 | 1.1845 | 0.9106 | 2.32 | 0.09 |
| NA                   | 1376816_at | 1.3841 | 1.2437 | 0.8986 | 2.32 | 0.07 |
| MGC112883            | 1371715_at | 1.4480 | 1.1913 | 0.8227 | 2.32 | 0.06 |
| LOC683586            | 1390771_at | 0.7062 | 1.0191 | 1.4432 | 2.32 | 1.53 |
| NA                   | 1394051_at | 1.3593 | 1.2605 | 0.9273 | 2.31 | 0.07 |
| LOC259246            | 1374912_at | 1.2801 | 1.1816 | 0.9230 | 2.31 | 0.11 |
| Zfp655               | 1376840_at | 0.9033 | 1.0956 | 1.2129 | 2.31 | 0.70 |
| Ifit2                | 1379568_at | 1.0894 | 1.0848 | 0.9957 | 2.31 | 0.29 |
| Gbp4_predicted       | 1385051_at | 1.2431 | 1.1442 | 0.9205 | 2.31 | 0.11 |
| NA                   | 1381503_at | 0.7074 | 1.0405 | 1.4709 | 2.30 | 1.53 |
| Mcm10_predicted      | 1392061_at | 1.3331 | 1.1911 | 0.8935 | 2.30 | 0.09 |
| NA                   | 1397214_at | 1.2272 | 1.1743 | 0.9569 | 2.30 | 0.11 |
| Unc93b1              | 1382043_at | 1.3366 | 1.1699 | 0.8752 | 2.30 | 0.09 |
| Casp4                | 1387818_at | 1.1640 | 1.1519 | 0.9896 | 2.29 | 0.14 |
| RGD1562246_predicted | 1376231_at | 1.4314 | 1.2163 | 0.8497 | 2.29 | 0.07 |
| Carhsp1              | 1371536_at | 1.3955 | 1.1717 | 0.8396 | 2.29 | 0.07 |
| LOC474169            | 1378419_at | 1.0826 | 1.7011 | 1.5713 | 2.29 | 0.29 |
| Sod2                 | 1370173_at | 1.1058 | 1.1408 | 1.0317 | 2.29 | 0.16 |
| Thrsp                | 1371400_at | 0.9455 | 1.0265 | 1.0857 | 2.29 | 0.56 |
| Birc5                | 1368799_at | 1.1543 | 1.1303 | 0.9791 | 2.29 | 0.16 |
| Irx4_predicted       | 1392981_at | 1.2590 | 1.2918 | 1.0260 | 2.28 | 0.11 |
| RGD1565356_predicted | 1397167_at | 1.3490 | 1.2305 | 0.9122 | 2.28 | 0.09 |
| LOC298018            | 1392227_at | 1.2145 | 1.1324 | 0.9324 | 2.28 | 0.14 |
| NA                   | 1385557_at | 1.2790 | 1.1528 | 0.9013 | 2.28 | 0.11 |
| Stc1                 | 1393559_at | 1.0584 | 1.0952 | 1.0347 | 2.28 | 0.29 |
| Psmb9                | 1370186_at | 1.2220 | 1.1646 | 0.9530 | 2.27 | 0.11 |
| Plk2                 | 1368106_at | 1.2948 | 1.1797 | 0.9111 | 2.27 | 0.09 |
| NA                   | 1393227_at | 1.4181 | 1.1745 | 0.8282 | 2.27 | 0.07 |
| NA                   | 1381854_at | 0.8990 | 1.0561 | 1.1748 | 2.27 | 0.70 |
| Upf3b_predicted      | 1374924_at | 1.3757 | 1.1565 | 0.8407 | 2.27 | 0.07 |
| Cpne8_predicted      | 1391830_at | 1.4100 | 1.1555 | 0.8195 | 2.27 | 0.07 |
| Uhrf1                | 1378640_at | 1.2561 | 1.2100 | 0.9632 | 2.26 | 0.11 |
| NA                   | 1380520_at | 1.3790 | 1.2163 | 0.8820 | 2.26 | 0.07 |
| Emb                  | 1368541_at | 1.1252 | 1.1626 | 1.0332 | 2.26 | 0.16 |
| Ube2c_predicted      | 1388484_at | 1.2141 | 1.1460 | 0.9439 | 2.26 | 0.14 |
| Psph                 | 1375964_at | 1.2599 | 1.1339 | 0.9000 | 2.26 | 0.11 |

|                      |              |        |        |        |      |      |
|----------------------|--------------|--------|--------|--------|------|------|
| Cyba                 | 1370219_at   | 1.4090 | 1.1683 | 0.8292 | 2.25 | 0.07 |
| Tlr4                 | 1387982_at   | 1.5165 | 1.1739 | 0.7741 | 2.25 | 0.03 |
| Rfc5_predicted       | 1392589_at   | 1.3436 | 1.1733 | 0.8732 | 2.25 | 0.09 |
| Pxmp4                | 1383117_at   | 0.8032 | 1.0316 | 1.2845 | 2.25 | 1.05 |
| Smarcad1_predicted   | 1377012_at   | 1.1589 | 1.1086 | 0.9566 | 2.25 | 0.16 |
| Card11_predicted     | 1378150_at   | 1.3012 | 1.2236 | 0.9404 | 2.25 | 0.09 |
| Pla2g2a              | 1368128_at   | 1.2224 | 1.2829 | 1.0495 | 2.25 | 0.11 |
| Stk6                 | 1376039_at   | 1.3326 | 1.1553 | 0.8670 | 2.25 | 0.09 |
| Xtrp3                | 1369705_at   | 1.1687 | 1.1230 | 0.9609 | 2.25 | 0.14 |
| Rgs18                | 1379387_at   | 1.4066 | 1.1968 | 0.8509 | 2.24 | 0.07 |
| Itgae                | 1370526_at   | 1.5367 | 1.1739 | 0.7639 | 2.24 | 0.03 |
| Dapp1_predicted      | 1378377_at   | 1.2702 | 1.1646 | 0.9169 | 2.24 | 0.11 |
| RGD1562047_predicted | 1373823_at   | 1.2905 | 1.1399 | 0.8833 | 2.24 | 0.09 |
| Dctn6_predicted      | 1396392_at   | 1.3397 | 1.1404 | 0.8512 | 2.24 | 0.09 |
| Bin2                 | 1390287_at   | 1.3996 | 1.1608 | 0.8294 | 2.24 | 0.07 |
| Serpina3n            | 1368224_at   | 1.1246 | 1.0898 | 0.9691 | 2.23 | 0.16 |
| Lmnb1                | 1368811_at   | 1.1783 | 1.0972 | 0.9312 | 2.23 | 0.14 |
| C2                   | 1383391_a_at | 1.3718 | 1.1993 | 0.8742 | 2.23 | 0.07 |
| Lilrb3               | 1387992_at   | 0.9726 | 1.0740 | 1.1042 | 2.23 | 0.56 |
| Itgam                | 1388046_at   | 0.6941 | 0.8680 | 1.2507 | 2.22 | 1.53 |
| LOC308990            | 1378915_x_at | 1.2993 | 1.1250 | 0.8659 | 2.22 | 0.09 |
| Spbc25               | 1389668_at   | 1.2504 | 1.1988 | 0.9587 | 2.22 | 0.11 |
| Asf1b_predicted      | 1383684_at   | 1.2960 | 1.1462 | 0.8844 | 2.22 | 0.09 |
| NA                   | 1389990_at   | 1.1122 | 1.2961 | 1.1653 | 2.22 | 0.16 |
| Cp                   | 1368418_a_at | 1.4537 | 1.1480 | 0.7897 | 2.21 | 0.06 |
| Crmp1                | 1387899_at   | 1.3754 | 1.1567 | 0.8410 | 2.21 | 0.07 |
| Kntc1_predicted      | 1377689_at   | 1.3188 | 1.1434 | 0.8670 | 2.21 | 0.09 |
| Myo5a                | 1368450_at   | 1.3602 | 1.1683 | 0.8589 | 2.21 | 0.07 |
| Lcp1                 | 1389210_at   | 1.2358 | 1.1400 | 0.9225 | 2.21 | 0.11 |
| Cxcl11               | 1379365_at   | 0.7934 | 1.1605 | 1.4627 | 2.21 | 1.24 |
| NA                   | 1379381_at   | 1.2695 | 1.1897 | 0.9371 | 2.21 | 0.11 |
| RGD1307679           | 1390118_at   | 1.4176 | 1.1324 | 0.7988 | 2.20 | 0.07 |
| Clec4a1              | 1395003_at   | 1.2418 | 1.1092 | 0.8932 | 2.20 | 0.11 |
| Junb                 | 1387788_at   | 0.9429 | 0.9945 | 1.0547 | 2.20 | 0.56 |
| Hist1h4b             | 1374600_at   | 1.4592 | 1.1290 | 0.7738 | 2.20 | 0.06 |
| Paics                | 1375924_at   | 1.0726 | 1.0428 | 0.9723 | 2.20 | 0.29 |
| Ifitm3               | 1387995_a_at | 1.4237 | 1.1311 | 0.7945 | 2.19 | 0.07 |
| Fshprh1              | 1368773_at   | 1.1910 | 1.1046 | 0.9274 | 2.19 | 0.14 |
| Apbb1ip              | 1377239_at   | 1.1186 | 1.0655 | 0.9525 | 2.19 | 0.16 |
| RGD1561238_predicted | 1373485_at   | 1.1198 | 1.0785 | 0.9631 | 2.19 | 0.16 |
| Coro1a               | 1369964_at   | 1.3056 | 1.1558 | 0.8853 | 2.19 | 0.09 |
| NA                   | 1391932_at   | 1.1948 | 1.1183 | 0.9360 | 2.18 | 0.14 |
| Pom210               | 1367919_at   | 1.3356 | 1.1419 | 0.8549 | 2.18 | 0.09 |
| NA                   | 1377106_at   | 1.2786 | 1.1066 | 0.8654 | 2.18 | 0.11 |
| Bnip3                | 1387805_at   | 1.1186 | 1.0637 | 0.9510 | 2.18 | 0.16 |
| NA                   | 1382950_at   | 1.2540 | 1.0873 | 0.8671 | 2.18 | 0.11 |
| NA                   | 1384174_at   | 1.3058 | 1.1100 | 0.8501 | 2.18 | 0.09 |
| NA                   | 1391803_at   | 1.1196 | 1.0776 | 0.9624 | 2.18 | 0.16 |
| Pou3f1               | 1370432_at   | 1.3441 | 1.1363 | 0.8454 | 2.18 | 0.09 |
| Mcm4                 | 1373557_at   | 1.2525 | 1.1676 | 0.9322 | 2.18 | 0.11 |
| LOC312299            | 1395697_at   | 1.4197 | 1.1164 | 0.7864 | 2.18 | 0.07 |
| Rfc3                 | 1389326_at   | 1.3750 | 1.1279 | 0.8203 | 2.17 | 0.07 |
| NA                   | 1384658_at   | 1.0680 | 1.0522 | 0.9853 | 2.17 | 0.29 |
| NA                   | 1379960_at   | 1.0984 | 1.0639 | 0.9686 | 2.17 | 0.16 |
| Cd7_predicted        | 1392082_a_at | 1.2697 | 1.1518 | 0.9072 | 2.17 | 0.11 |

|                      |              |        |        |        |      |      |
|----------------------|--------------|--------|--------|--------|------|------|
| NA                   | 1375532_at   | 1.2468 | 1.0827 | 0.8684 | 2.17 | 0.11 |
| Hist1h2bh            | 1390021_at   | 1.4097 | 1.1150 | 0.7909 | 2.17 | 0.07 |
| Spn                  | 1370987_at   | 1.3366 | 1.1453 | 0.8569 | 2.17 | 0.09 |
| C6                   | 1385047_x_at | 0.9395 | 0.9728 | 1.0355 | 2.17 | 0.56 |
| NA                   | 1389678_at   | 1.1211 | 1.1674 | 1.0413 | 2.17 | 0.16 |
| Spic_predicted       | 1378047_at   | 1.2608 | 1.0826 | 0.8586 | 2.17 | 0.11 |
| RGD1561464_predicted | 1392128_at   | 1.3539 | 1.1168 | 0.8249 | 2.17 | 0.09 |
| Ccnb1                | 1370345_at   | 1.0833 | 1.0672 | 0.9852 | 2.17 | 0.29 |
| RGD1307679           | 1391893_at   | 1.3591 | 1.0988 | 0.8084 | 2.17 | 0.07 |
| Il9r                 | 1369359_at   | 1.2911 | 1.1266 | 0.8726 | 2.17 | 0.09 |
| NA                   | 1370988_at   | 1.0757 | 1.2311 | 1.1445 | 2.16 | 0.29 |
| Pfc                  | 1393411_at   | 1.1269 | 1.0613 | 0.9418 | 2.16 | 0.16 |
| Klra5                | 1388282_s_at | 1.3151 | 1.1030 | 0.8387 | 2.16 | 0.09 |
| NA                   | 1386410_at   | 1.3255 | 1.1369 | 0.8577 | 2.16 | 0.09 |
| LOC678905            | 1390053_at   | 0.9832 | 0.9997 | 1.0167 | 2.16 | 0.43 |
| LOC295635            | 1391637_at   | 1.2563 | 1.0725 | 0.8537 | 2.15 | 0.11 |
| Egr1                 | 1368321_at   | 0.9087 | 0.9860 | 1.0850 | 2.15 | 0.70 |
| NA                   | 1385978_at   | 1.1701 | 1.0574 | 0.9037 | 2.15 | 0.14 |
| Uchl5                | 1373897_at   | 1.1554 | 1.0829 | 0.9373 | 2.15 | 0.16 |
| Dhfr                 | 1383536_at   | 1.2324 | 1.0962 | 0.8895 | 2.15 | 0.11 |
| LOC498736            | 1373718_at   | 1.4401 | 1.1105 | 0.7711 | 2.15 | 0.06 |
| Phlda1               | 1368860_at   | 0.9582 | 0.9779 | 1.0206 | 2.15 | 0.56 |
| RGD1306534_predicted | 1372055_at   | 1.3301 | 1.1012 | 0.8279 | 2.15 | 0.09 |
| Igf1                 | 1382599_at   | 1.1776 | 1.1597 | 0.9848 | 2.15 | 0.14 |
| Hla-dmb              | 1370882_at   | 1.3071 | 1.1260 | 0.8615 | 2.15 | 0.09 |
| NA                   | 1392722_at   | 1.1459 | 1.1070 | 0.9661 | 2.14 | 0.16 |
| Me2_predicted        | 1381403_at   | 1.3106 | 1.0829 | 0.8262 | 2.14 | 0.09 |
| Gpaal                | 1394579_at   | 1.0660 | 1.0472 | 0.9824 | 2.14 | 0.29 |
| NA                   | 1379688_at   | 1.2600 | 1.0771 | 0.8549 | 2.14 | 0.11 |
| NA                   | 1384939_at   | 1.2161 | 1.1480 | 0.9440 | 2.14 | 0.14 |
| Mcm7                 | 1388744_at   | 1.2935 | 1.1095 | 0.8578 | 2.14 | 0.09 |
| Myo1f_predicted      | 1384298_at   | 1.2420 | 1.0723 | 0.8633 | 2.14 | 0.11 |
| NA                   | 1388773_at   | 0.9665 | 1.0306 | 1.0663 | 2.13 | 0.56 |
| Satb1                | 1378629_at   | 1.3351 | 1.0868 | 0.8140 | 2.13 | 0.09 |
| Racgap1_predicted    | 1384259_at   | 1.1241 | 1.0520 | 0.9359 | 2.13 | 0.16 |
| Fcer2a               | 1369872_a_at | 1.2416 | 1.0730 | 0.8642 | 2.13 | 0.11 |
| NA                   | 1383578_at   | 1.1756 | 1.1029 | 0.9381 | 2.13 | 0.14 |
| NA                   | 1382291_at   | 1.2082 | 1.0871 | 0.8998 | 2.13 | 0.14 |
| NA                   | 1394706_at   | 1.1938 | 1.0855 | 0.9093 | 2.13 | 0.14 |
| RGD1560608_predicted | 1394411_at   | 1.2556 | 1.0648 | 0.8480 | 2.13 | 0.11 |
| Dpysl5               | 1391077_at   | 1.2286 | 1.0594 | 0.8622 | 2.13 | 0.11 |
| Dhfr                 | 1370075_at   | 1.2236 | 1.0829 | 0.8850 | 2.12 | 0.11 |
| Ctsc                 | 1368280_at   | 1.2408 | 1.0658 | 0.8590 | 2.12 | 0.11 |
| Kif20a_predicted     | 1373722_at   | 1.0989 | 1.0467 | 0.9525 | 2.12 | 0.16 |
| RGD1561419_predicted | 1392407_at   | 1.1795 | 1.0698 | 0.9070 | 2.12 | 0.14 |
| Mmaa_predicted       | 1377302_a_at | 1.3062 | 1.0695 | 0.8188 | 2.12 | 0.09 |
| NA                   | 1378261_at   | 1.2908 | 1.0758 | 0.8334 | 2.12 | 0.09 |
| Lxn                  | 1367768_at   | 1.0678 | 1.0138 | 0.9494 | 2.12 | 0.29 |
| Tnfaip8l2            | 1379760_at   | 1.2901 | 1.0761 | 0.8341 | 2.12 | 0.09 |
| Fcgr3                | 1398246_s_at | 0.9744 | 0.9782 | 1.0040 | 2.12 | 0.56 |
| Tk1                  | 1372631_at   | 1.1685 | 1.0737 | 0.9189 | 2.12 | 0.14 |
| Emr1                 | 1381311_at   | 1.2266 | 1.1433 | 0.9321 | 2.12 | 0.11 |
| Lpo_predicted        | 1377429_at   | 0.7985 | 0.9958 | 1.2471 | 2.11 | 1.24 |
| Racgap1_predicted    | 1373658_at   | 1.1670 | 1.0575 | 0.9062 | 2.11 | 0.14 |
| Rin3_predicted       | 1375020_at   | 1.2643 | 1.0468 | 0.8280 | 2.10 | 0.11 |

|                      |              |        |        |        |      |      |
|----------------------|--------------|--------|--------|--------|------|------|
| Rac2                 | 1372404_at   | 1.2007 | 1.0735 | 0.8941 | 2.10 | 0.14 |
| NA                   | 1382652_at   | 1.3761 | 1.0887 | 0.7912 | 2.10 | 0.07 |
| RGD1310360           | 1372903_at   | 1.1615 | 1.0542 | 0.9076 | 2.10 | 0.16 |
| Ifit2                | 1384180_at   | 1.0660 | 0.9987 | 0.9368 | 2.10 | 0.29 |
| Lat                  | 1368723_at   | 1.2550 | 1.1172 | 0.8902 | 2.10 | 0.11 |
| Jmjd3_predicted      | 1390000_at   | 0.5623 | 0.7425 | 1.3204 | 2.10 | 2.71 |
| Vrk1                 | 1380009_at   | 1.3145 | 1.0718 | 0.8154 | 2.10 | 0.09 |
| Mgp                  | 1367568_a_at | 1.1984 | 1.0793 | 0.9006 | 2.10 | 0.14 |
| LOC290396            | 1376377_at   | 1.0498 | 1.0175 | 0.9692 | 2.09 | 0.29 |
| S100a8               | 1368494_at   | 1.0006 | 1.9467 | 1.9456 | 2.09 | 0.43 |
| Hist1h4b             | 1372726_at   | 1.3175 | 1.0510 | 0.7977 | 2.09 | 0.09 |
| Lysmd3               | 1376436_at   | 1.1326 | 1.0246 | 0.9047 | 2.09 | 0.16 |
| RGD1565023_predicted | 1372322_at   | 1.3318 | 1.0591 | 0.7952 | 2.09 | 0.09 |
| NA                   | 1379372_at   | 1.1992 | 1.0306 | 0.8595 | 2.09 | 0.14 |
| Cd3z                 | 1370621_at   | 1.2316 | 1.1161 | 0.9062 | 2.09 | 0.11 |
| C2                   | 1393219_at   | 1.0842 | 1.1218 | 1.0346 | 2.09 | 0.29 |
| NA                   | 1396545_at   | 0.8586 | 0.9079 | 1.0575 | 2.09 | 0.88 |
| Msn                  | 1368948_at   | 0.7226 | 0.8420 | 1.1653 | 2.09 | 1.53 |
| Tmsb10               | 1367655_at   | 1.3110 | 1.0546 | 0.8045 | 2.09 | 0.09 |
| Gadd45a              | 1368947_at   | 1.0083 | 0.9803 | 0.9722 | 2.09 | 0.43 |
| LOC499933            | 1383323_at   | 1.1734 | 1.0562 | 0.9001 | 2.08 | 0.14 |
| RGD1308396_predicted | 1373490_at   | 1.2301 | 1.0308 | 0.8379 | 2.08 | 0.11 |
| Nudt18               | 1373230_at   | 1.0954 | 1.0031 | 0.9157 | 2.08 | 0.16 |
| Gpr19                | 1382739_at   | 1.3310 | 1.0452 | 0.7853 | 2.08 | 0.09 |
| Casp6                | 1368305_at   | 1.3364 | 1.0567 | 0.7907 | 2.07 | 0.09 |
| NA                   | 1381705_at   | 1.1206 | 1.0443 | 0.9319 | 2.07 | 0.16 |
| Cib2                 | 1389166_at   | 0.8232 | 0.9402 | 1.1422 | 2.07 | 1.05 |
| Dusp1                | 1368146_at   | 0.9823 | 0.9997 | 1.0177 | 2.07 | 0.43 |
| Rps24                | 1398546_at   | 1.1717 | 1.0418 | 0.8891 | 2.07 | 0.14 |
| Nphp1_predicted      | 1372172_at   | 1.2743 | 1.0588 | 0.8309 | 2.07 | 0.11 |
| Ccl3                 | 1369815_at   | 1.3295 | 1.0405 | 0.7826 | 2.07 | 0.09 |
| RGD1560391_predicted | 1374778_at   | 1.2288 | 1.0330 | 0.8406 | 2.06 | 0.11 |
| NA                   | 1397958_at   | 0.9810 | 0.9688 | 0.9876 | 2.06 | 0.43 |
| Comtd1_predicted     | 1373150_at   | 1.2828 | 1.0504 | 0.8188 | 2.06 | 0.09 |
| Btg2                 | 1386995_at   | 0.9681 | 0.9705 | 1.0025 | 2.06 | 0.56 |
| RGD1563547_predicted | 1383221_at   | 1.3609 | 1.0346 | 0.7602 | 2.06 | 0.07 |
| Myh1                 | 1370971_at   | 0.7410 | 0.9242 | 1.2473 | 2.06 | 1.34 |
| Kcne3                | 1387160_at   | 1.2669 | 1.0393 | 0.8204 | 2.06 | 0.11 |
| Plk1                 | 1370297_at   | 1.0977 | 1.0006 | 0.9115 | 2.05 | 0.16 |
| RGD1564081_predicted | 1376151_a_at | 0.8551 | 0.9391 | 1.0982 | 2.05 | 0.88 |
| Ptpre                | 1371115_at   | 1.0878 | 0.9853 | 0.9057 | 2.05 | 0.29 |
| Lyn                  | 1387277_at   | 1.1315 | 1.0132 | 0.8954 | 2.05 | 0.16 |
| NA                   | 1383637_at   | 1.3010 | 1.0512 | 0.8080 | 2.05 | 0.09 |
| Plxnc1_predicted     | 1398644_at   | 1.1074 | 1.0060 | 0.9084 | 2.05 | 0.16 |
| Dut                  | 1387865_at   | 1.1412 | 1.0076 | 0.8829 | 2.05 | 0.16 |
| Cdc20                | 1370294_a_at | 0.9836 | 0.9626 | 0.9787 | 2.04 | 0.43 |
| Slc2a1               | 1370848_at   | 1.2334 | 1.0189 | 0.8261 | 2.04 | 0.11 |
| Dio2                 | 1369778_at   | 1.0514 | 0.9673 | 0.9200 | 2.04 | 0.29 |
| Sat                  | 1371774_at   | 1.2598 | 1.0287 | 0.8165 | 2.04 | 0.11 |
| Rfc2                 | 1370910_at   | 1.2333 | 1.0206 | 0.8276 | 2.04 | 0.11 |
| Lcp2                 | 1390797_at   | 1.2385 | 1.0318 | 0.8332 | 2.04 | 0.11 |
| LOC311984            | 1382181_at   | 1.2132 | 1.0070 | 0.8300 | 2.04 | 0.14 |
| NA                   | 1396288_s_at | 0.9595 | 0.9675 | 1.0084 | 2.04 | 0.56 |
| NA                   | 1389986_at   | 0.5839 | 0.8147 | 1.3953 | 2.04 | 2.37 |
| PRP-2                | 1372702_at   | 1.2413 | 1.0494 | 0.8454 | 2.04 | 0.11 |

|                      |              |         |        |        |      |      |
|----------------------|--------------|---------|--------|--------|------|------|
| NA                   | 1388872_at   | 1.2915  | 1.0278 | 0.7958 | 2.04 | 0.09 |
| Hmnr                 | 1370461_at   | 1.0983  | 1.0072 | 0.9170 | 2.04 | 0.16 |
| Tf                   | 1370228_at   | 1.0233  | 1.0670 | 1.0427 | 2.03 | 0.43 |
| Cpxm1_predicted      | 1390420_at   | 0.9418  | 0.9946 | 1.0560 | 2.03 | 0.56 |
| NA                   | 1374987_at   | 1.2099  | 1.0349 | 0.8553 | 2.03 | 0.14 |
| Cdca1                | 1383940_at   | 1.0792  | 1.0072 | 0.9332 | 2.03 | 0.29 |
| Gimap4               | 1377286_at   | 1.1606  | 1.0329 | 0.8899 | 2.03 | 0.16 |
| NA                   | 1391517_at   | 0.9062  | 0.9319 | 1.0284 | 2.03 | 0.70 |
| NA                   | 1382078_at   | 1.1296  | 1.0211 | 0.9040 | 2.03 | 0.16 |
| F5                   | 1374320_at   | 0.9062  | 0.9692 | 1.0696 | 2.03 | 0.70 |
| RGD1311098           | 1373198_at   | 1.3137  | 1.0242 | 0.7796 | 2.02 | 0.09 |
| Ctsw                 | 1382378_at   | 1.1389  | 0.9957 | 0.8742 | 2.02 | 0.16 |
| Smc211_predicted     | 1393041_at   | 1.0847  | 1.0018 | 0.9236 | 2.02 | 0.29 |
| RGD1309720           | 1393612_a_at | 1.0962  | 0.9986 | 0.9110 | 2.02 | 0.16 |
| LOC498022            | 1373889_at   | 1.1439  | 0.9936 | 0.8686 | 2.02 | 0.16 |
| Gdpd1_predicted      | 1385302_at   | 1.1530  | 0.9985 | 0.8660 | 2.02 | 0.16 |
| RGD1305288           | 1374802_at   | 1.1863  | 0.9982 | 0.8414 | 2.02 | 0.14 |
| Cdca8                | 1371928_at   | 1.1088  | 1.0112 | 0.9120 | 2.02 | 0.16 |
| Kcnh1                | 1368061_at   | 1.0393  | 1.0528 | 1.0130 | 2.02 | 0.29 |
| LOC619558            | 1381940_at   | 1.0705  | 0.9763 | 0.9120 | 2.02 | 0.29 |
| RGD1566242_predicted | 1382193_at   | 0.7524  | 0.8487 | 1.1280 | 2.02 | 1.34 |
| NA                   | 1391817_at   | 1.1303  | 1.0022 | 0.8867 | 2.02 | 0.16 |
| RGD1311937_predicted | 1394653_at   | 1.0681  | 1.1013 | 1.0311 | 2.02 | 0.29 |
| Orc6l                | 1376317_at   | 1.1524  | 1.0020 | 0.8695 | 2.02 | 0.16 |
| Cd200                | 1369670_at   | 1.2631  | 1.0002 | 0.7919 | 2.02 | 0.11 |
| Gloxd1               | 1393228_at   | 1.1317  | 1.0177 | 0.8993 | 2.01 | 0.16 |
| Zfp36                | 1387870_at   | 1.0308  | 0.9488 | 0.9204 | 2.01 | 0.43 |
| Zfp91                | 1383052_a_at | 1.0616  | 0.9721 | 0.9157 | 2.01 | 0.29 |
| Tmem49               | 1370807_at   | 1.1982  | 0.9890 | 0.8254 | 2.01 | 0.14 |
| Orc6l                | 1398439_a_at | 1.1257  | 0.9808 | 0.8712 | 2.01 | 0.16 |
| Dusp6                | 1382778_at   | 1.1845  | 1.0034 | 0.8471 | 2.01 | 0.14 |
| NA                   | 1378801_at   | 1.2206  | 1.0085 | 0.8262 | 2.01 | 0.11 |
| Nfkb1                | 1370968_at   | 1.2053  | 1.0213 | 0.8473 | 2.01 | 0.14 |
| Hist3h2ba_predicted  | 1392512_at   | 1.0414  | 0.9571 | 0.9190 | 2.00 | 0.29 |
| NA                   | 1378890_at   | 1.0871  | 0.9605 | 0.8835 | 2.00 | 0.29 |
| Cipar1               | 1370962_at   | 1.2424  | 1.0059 | 0.8097 | 2.00 | 0.11 |
| Rfc4_predicted       | 1388458_at   | 1.2093  | 0.9884 | 0.8174 | 2.00 | 0.14 |
| RGD1564142_predicted | 1380930_at   | 1.1230  | 1.0319 | 0.9189 | 2.00 | 0.16 |
| NA                   | 1394235_at   | 1.2005  | 0.9929 | 0.8271 | 2.00 | 0.14 |
| Chek1                | 1387062_a_at | 1.1698  | 1.0155 | 0.8681 | 2.00 | 0.14 |
| S100a9               | 1387125_at   | 0.9648  | 1.8638 | 1.9319 | 2.00 | 0.56 |
| Ccl7                 | 1379935_at   | 0.9162  | 0.9321 | 1.0174 | 2.00 | 0.70 |
| Hif1a                | 1368149_at   | 1.2919  | 0.9871 | 0.7640 | 1.98 | 0.09 |
| Hif1a                | 1387076_at   | 1.17048 | 0.9481 | 0.8101 | 1.93 | 0.14 |

| 686 Down-regulated probe sets associated with ZD | Affymetrix Probe ID*       | Score (d) | Numerator (r) | Denominator (s+s0) | Fold-Change** | q-value (%) |
|--------------------------------------------------|----------------------------|-----------|---------------|--------------------|---------------|-------------|
| RGD1562234_predicted                             | <a href="#">1373276_at</a> | -2.3753   | -5.3660       | 2.2590             | 0.02          | 0.00        |
| Slurp1_predicted                                 | <a href="#">1373493_at</a> | -4.6166   | -5.0622       | 1.0965             | 0.03          | 0.00        |
| RGD1304904_predicted                             | <a href="#">1385129_at</a> | -4.4267   | -4.5246       | 1.0221             | 0.04          | 0.00        |
| LOC361776                                        | <a href="#">1373254_at</a> | -2.0010   | -3.6794       | 1.8388             | 0.04          | 0.00        |
| LOC687873                                        | <a href="#">1398090_at</a> | -3.9456   | -4.3151       | 1.0937             | 0.05          | 0.00        |
| RGD1311975                                       | <a href="#">1384491_at</a> | -4.2858   | -4.2274       | 0.9864             | 0.05          | 0.00        |

|                      |                              |         |         |        |      |      |
|----------------------|------------------------------|---------|---------|--------|------|------|
| NA                   | <a href="#">1384236_at</a>   | -3.2807 | -4.6240 | 1.4095 | 0.06 | 0.00 |
| RGD1309610_predicted | <a href="#">1383432_at</a>   | -3.6907 | -4.3279 | 1.1726 | 0.06 | 0.00 |
| Fxyd4                | <a href="#">1387092_at</a>   | -4.4727 | -4.1329 | 0.9240 | 0.06 | 0.00 |
| NA                   | <a href="#">1374241_at</a>   | -3.9164 | -4.0871 | 1.0436 | 0.06 | 0.00 |
| NA                   | <a href="#">1397903_at</a>   | -3.6834 | -3.8216 | 1.0375 | 0.06 | 0.00 |
| RGD1559748_predicted | <a href="#">1383203_at</a>   | -2.8662 | -4.3136 | 1.5050 | 0.07 | 0.00 |
| LOC686143            | <a href="#">1381286_at</a>   | -3.0467 | -4.2853 | 1.4066 | 0.07 | 0.00 |
| Adh6a_predicted      | <a href="#">1381756_at</a>   | -3.5764 | -3.6664 | 1.0251 | 0.07 | 0.00 |
| P2rx2                | <a href="#">1387578_a_at</a> | -4.1023 | -3.6092 | 0.8798 | 0.08 | 0.00 |
| NA                   | <a href="#">1379888_at</a>   | -3.0740 | -3.9812 | 1.2951 | 0.09 | 0.00 |
| Upk1b                | <a href="#">1383875_at</a>   | -2.9793 | -3.7358 | 1.2539 | 0.09 | 0.00 |
| Kb1                  | <a href="#">1370868_at</a>   | -2.4488 | -3.4216 | 1.3972 | 0.09 | 0.00 |
| NA                   | <a href="#">1386128_at</a>   | -0.6162 | -1.2519 | 2.0317 | 0.09 | 2.03 |
| RGD1308195_predicted | <a href="#">1392821_at</a>   | -3.0295 | -3.5976 | 1.1875 | 0.10 | 0.00 |
| Gdpd2_predicted      | <a href="#">1383546_at</a>   | -3.3604 | -3.4903 | 1.0387 | 0.10 | 0.00 |
| NA                   | <a href="#">1393018_at</a>   | -3.6917 | -3.3274 | 0.9013 | 0.10 | 0.00 |
| RGD1563692_predicted | <a href="#">1394408_at</a>   | -3.2243 | -3.4432 | 1.0679 | 0.10 | 0.00 |
| Elmod1_predicted     | <a href="#">1389781_at</a>   | -2.4234 | -4.0649 | 1.6774 | 0.11 | 0.00 |
| NA                   | <a href="#">1373167_at</a>   | -3.4989 | -3.2346 | 0.9245 | 0.11 | 0.00 |
| DLP2                 | <a href="#">1385559_at</a>   | -2.5634 | -3.9164 | 1.5278 | 0.11 | 0.00 |
| NA                   | <a href="#">1398433_at</a>   | -2.5084 | -3.1122 | 1.2407 | 0.11 | 0.00 |
| Oact2                | <a href="#">1392943_at</a>   | -2.9026 | -3.1989 | 1.1021 | 0.12 | 0.00 |
| RGD1563131_predicted | <a href="#">1397173_at</a>   | -2.6589 | -3.2840 | 1.2351 | 0.12 | 0.00 |
| NA                   | <a href="#">1392136_at</a>   | -2.0593 | -4.1688 | 2.0244 | 0.12 | 0.00 |
| Fetub                | <a href="#">1387082_at</a>   | -2.9019 | -3.1491 | 1.0852 | 0.12 | 0.00 |
| Ptgds                | <a href="#">1367851_at</a>   | -3.1406 | -3.0095 | 0.9582 | 0.13 | 0.00 |
| RGD1565626_predicted | <a href="#">1384999_at</a>   | -2.2856 | -3.7357 | 1.6344 | 0.13 | 0.00 |
| Mest                 | <a href="#">1371731_at</a>   | -2.6883 | -2.8778 | 1.0705 | 0.13 | 0.00 |
| Cryba4               | <a href="#">1367608_at</a>   | -3.1888 | -2.8807 | 0.9034 | 0.13 | 0.00 |
| RGD1565626_predicted | <a href="#">1384803_at</a>   | -2.2145 | -3.7626 | 1.6990 | 0.13 | 0.00 |
| B0at1                | <a href="#">1398463_at</a>   | -2.5025 | -3.2610 | 1.3031 | 0.13 | 0.00 |
| RGD1565626_predicted | <a href="#">1392080_at</a>   | -2.1838 | -3.7623 | 1.7228 | 0.14 | 0.00 |
| Tacr2                | <a href="#">1387754_at</a>   | -3.1201 | -2.8335 | 0.9082 | 0.14 | 0.00 |
| Cyp26b1              | <a href="#">1384392_at</a>   | -3.0438 | -2.8973 | 0.9519 | 0.14 | 0.00 |
| P2rx2                | <a href="#">1369475_x_at</a> | -3.3043 | -2.8275 | 0.8557 | 0.14 | 0.00 |
| Pvalb                | <a href="#">1370214_at</a>   | -2.6822 | -2.7934 | 1.0414 | 0.14 | 0.00 |
| NA                   | <a href="#">1391504_at</a>   | -2.2493 | -3.2512 | 1.4454 | 0.15 | 0.00 |
| Cte1                 | <a href="#">1398250_at</a>   | -2.5667 | -2.6954 | 1.0501 | 0.15 | 0.00 |
| RGD1309879           | <a href="#">1377307_at</a>   | -2.3383 | -3.2680 | 1.3976 | 0.15 | 0.00 |
| Tmem86a_predicted    | <a href="#">1373309_at</a>   | -2.4239 | -2.8111 | 1.1597 | 0.16 | 0.00 |
| RGD1563441_predicted | <a href="#">1393565_at</a>   | -2.5639 | -2.7823 | 1.0852 | 0.16 | 0.00 |
| Actl6b_predicted     | <a href="#">1382608_at</a>   | -2.5562 | -2.7403 | 1.0720 | 0.17 | 0.00 |
| Oact2                | <a href="#">1379075_at</a>   | -2.9035 | -2.5904 | 0.8922 | 0.17 | 0.00 |
| RGD1565626_predicted | <a href="#">1374986_x_at</a> | -2.3484 | -2.8863 | 1.2291 | 0.17 | 0.00 |
| LOC681124            | <a href="#">1392804_at</a>   | -2.1780 | -2.9780 | 1.3673 | 0.17 | 0.00 |
| Hsd11b2              | <a href="#">1368102_at</a>   | -2.5127 | -2.6971 | 1.0734 | 0.17 | 0.00 |
| LOC679461            | <a href="#">1384961_at</a>   | -2.0141 | -3.3535 | 1.6650 | 0.17 | 0.00 |
| Dhrs10               | <a href="#">1391800_at</a>   | -2.3871 | -2.7626 | 1.1573 | 0.18 | 0.00 |
| Ugt8                 | <a href="#">1368858_at</a>   | -2.6745 | -2.4255 | 0.9069 | 0.18 | 0.00 |
| Fgf3                 | <a href="#">1387532_at</a>   | -2.4443 | -2.6105 | 1.0680 | 0.18 | 0.00 |
| NA                   | <a href="#">1382031_at</a>   | -2.1443 | -2.3492 | 1.0955 | 0.18 | 0.00 |
| Stag3                | <a href="#">1368613_at</a>   | -2.5387 | -2.3814 | 0.9380 | 0.19 | 0.00 |
| NA                   | <a href="#">1395770_at</a>   | -2.1546 | -2.2926 | 1.0641 | 0.19 | 0.00 |
| NA                   | <a href="#">1390182_at</a>   | -2.0410 | -2.9155 | 1.4285 | 0.19 | 0.00 |
| NA                   | <a href="#">1393109_at</a>   | -2.4076 | -2.4389 | 1.0130 | 0.19 | 0.00 |

|                      |                              |         |         |        |      |      |
|----------------------|------------------------------|---------|---------|--------|------|------|
| NA                   | <a href="#">1382347_at</a>   | -2.1400 | -2.7398 | 1.2803 | 0.19 | 0.00 |
| NA                   | <a href="#">1398692_at</a>   | -1.4420 | -1.9850 | 1.3766 | 0.19 | 0.05 |
| RGD1562107_predicted | <a href="#">1381573_at</a>   | -2.4519 | -2.4443 | 0.9969 | 0.20 | 0.00 |
| RGD1311155           | <a href="#">1389581_at</a>   | -2.5210 | -2.2944 | 0.9101 | 0.20 | 0.00 |
| LOC686098            | <a href="#">1380940_at</a>   | -2.5122 | -2.3781 | 0.9466 | 0.20 | 0.00 |
| NA                   | <a href="#">1394517_at</a>   | -2.3526 | -2.2575 | 0.9596 | 0.20 | 0.00 |
| Lypd2_predicted      | <a href="#">1375132_at</a>   | -2.6978 | -2.2764 | 0.8438 | 0.21 | 0.00 |
| Hpd                  | <a href="#">1368188_at</a>   | -2.0180 | -2.5551 | 1.2662 | 0.21 | 0.00 |
| NA                   | <a href="#">1376398_at</a>   | -2.2866 | -2.2639 | 0.9901 | 0.21 | 0.00 |
| Frzb                 | <a href="#">1375961_at</a>   | -2.1671 | -2.1778 | 1.0049 | 0.21 | 0.00 |
| NA                   | <a href="#">1397225_at</a>   | -2.1325 | -2.2309 | 1.0461 | 0.21 | 0.00 |
| NA                   | <a href="#">1390601_at</a>   | -2.2969 | -2.2502 | 0.9797 | 0.22 | 0.00 |
| NA                   | <a href="#">1391024_at</a>   | -2.1122 | -2.3710 | 1.1225 | 0.22 | 0.00 |
| Cnn1                 | <a href="#">1367785_at</a>   | -2.4594 | -2.1867 | 0.8891 | 0.22 | 0.00 |
| Aldh1a1              | <a href="#">1387022_at</a>   | -2.6506 | -2.1595 | 0.8147 | 0.22 | 0.00 |
| NA                   | <a href="#">1392613_at</a>   | -1.8113 | -2.3961 | 1.3229 | 0.22 | 0.00 |
| NA                   | <a href="#">1384743_at</a>   | -1.9301 | -2.5388 | 1.3154 | 0.22 | 0.00 |
| Bmp6                 | <a href="#">1388920_at</a>   | -2.2924 | -2.2807 | 0.9949 | 0.22 | 0.00 |
| NA                   | <a href="#">1370078_at</a>   | -2.6661 | -2.1792 | 0.8174 | 0.22 | 0.00 |
| lml                  | <a href="#">1369846_at</a>   | -2.4571 | -2.1272 | 0.8657 | 0.22 | 0.00 |
| NA                   | <a href="#">1392597_at</a>   | -1.9307 | -2.6114 | 1.3526 | 0.22 | 0.00 |
| Kb40                 | <a href="#">1378317_at</a>   | -1.9494 | -2.4214 | 1.2421 | 0.23 | 0.00 |
| LOC680866            | <a href="#">1384195_at</a>   | -2.0922 | -2.2845 | 1.0919 | 0.23 | 0.00 |
| Slc23a1              | <a href="#">1369169_at</a>   | -2.6067 | -2.1130 | 0.8106 | 0.23 | 0.00 |
| NA                   | <a href="#">1383557_at</a>   | -2.0337 | -2.3484 | 1.1547 | 0.23 | 0.00 |
| NA                   | <a href="#">1373759_at</a>   | -1.3829 | -1.9222 | 1.3900 | 0.23 | 0.06 |
| Sts                  | <a href="#">1368372_at</a>   | -2.2966 | -2.1260 | 0.9257 | 0.23 | 0.00 |
| NA                   | <a href="#">1378601_at</a>   | -2.5058 | -2.0876 | 0.8331 | 0.23 | 0.00 |
| NA                   | <a href="#">1383995_at</a>   | -2.4830 | -2.0758 | 0.8360 | 0.23 | 0.00 |
| NA                   | <a href="#">1382324_at</a>   | -1.9665 | -2.3411 | 1.1905 | 0.23 | 0.00 |
| NA                   | <a href="#">1393827_at</a>   | -2.1852 | -2.0269 | 0.9276 | 0.23 | 0.00 |
| NA                   | <a href="#">1380013_at</a>   | -1.9271 | -2.3482 | 1.2185 | 0.24 | 0.00 |
| NA                   | <a href="#">1397166_at</a>   | -1.9265 | -2.3464 | 1.2180 | 0.24 | 0.00 |
| RGD1311589_predicted | <a href="#">1374142_at</a>   | -2.0571 | -2.0723 | 1.0074 | 0.24 | 0.00 |
| Pdlim3               | <a href="#">1370291_at</a>   | -2.1698 | -2.0406 | 0.9405 | 0.24 | 0.00 |
| NA                   | <a href="#">1383164_at</a>   | -2.0768 | -2.1906 | 1.0548 | 0.24 | 0.00 |
| NA                   | <a href="#">1372381_at</a>   | -2.3640 | -2.0471 | 0.8660 | 0.24 | 0.00 |
| Cdh16                | <a href="#">1390822_at</a>   | -1.9550 | -2.3325 | 1.1931 | 0.24 | 0.00 |
| Ggh                  | <a href="#">1368470_at</a>   | -2.4164 | -2.0350 | 0.8422 | 0.24 | 0.00 |
| NA                   | <a href="#">1380306_at</a>   | -1.8026 | -2.1572 | 1.1967 | 0.24 | 0.00 |
| NA                   | <a href="#">1384474_at</a>   | -2.1887 | -1.9933 | 0.9107 | 0.24 | 0.00 |
| Cpe                  | <a href="#">1386921_at</a>   | -2.3124 | -2.0602 | 0.8909 | 0.25 | 0.00 |
| LOC678826            | <a href="#">1375349_at</a>   | -2.2639 | -2.0486 | 0.9049 | 0.25 | 0.00 |
| Id4                  | <a href="#">1394022_at</a>   | -2.0995 | -2.0829 | 0.9921 | 0.25 | 0.00 |
| Fmo2                 | <a href="#">1377635_at</a>   | -2.0407 | -1.9733 | 0.9670 | 0.25 | 0.00 |
| Cobl_predicted       | <a href="#">1384834_at</a>   | -1.6762 | -2.4674 | 1.4720 | 0.25 | 0.00 |
| Ces3                 | <a href="#">1370363_at</a>   | -1.9272 | -2.1633 | 1.1225 | 0.25 | 0.00 |
| NA                   | <a href="#">1379382_at</a>   | -2.0225 | -2.0312 | 1.0043 | 0.25 | 0.00 |
| NA                   | <a href="#">1385558_at</a>   | -1.8118 | -2.3685 | 1.3073 | 0.25 | 0.00 |
| NA                   | <a href="#">1393528_at</a>   | -2.0323 | -1.9946 | 0.9814 | 0.25 | 0.00 |
| Bbox1                | <a href="#">1369546_at</a>   | -2.4068 | -2.0056 | 0.8333 | 0.25 | 0.00 |
| LOC679389            | <a href="#">1386120_at</a>   | -2.0333 | -2.0063 | 0.9867 | 0.25 | 0.00 |
| RGD1564935_predicted | <a href="#">1370896_a_at</a> | -2.2196 | -1.9970 | 0.8997 | 0.25 | 0.00 |
| Myl9_predicted       | <a href="#">1388298_at</a>   | -2.1070 | -1.9665 | 0.9333 | 0.26 | 0.00 |
| RGD1304927_predicted | <a href="#">1371260_at</a>   | -1.5798 | -2.3245 | 1.4714 | 0.26 | 0.05 |



|                      |                              |         |         |        |      |      |
|----------------------|------------------------------|---------|---------|--------|------|------|
| Mcpt1                | <a href="#">1369572_at</a>   | -1.6764 | -2.3706 | 1.4141 | 0.26 | 0.00 |
| Per2                 | <a href="#">1368303_at</a>   | -2.1532 | -1.9328 | 0.8977 | 0.26 | 0.00 |
| NA                   | <a href="#">1380850_at</a>   | -1.9913 | -2.0310 | 1.0199 | 0.26 | 0.00 |
| Nmbr                 | <a href="#">1387515_at</a>   | -2.1710 | -1.9370 | 0.8922 | 0.26 | 0.00 |
| LOC367994            | <a href="#">1389503_at</a>   | -2.1631 | -1.9557 | 0.9041 | 0.26 | 0.00 |
| Dmn                  | <a href="#">1372658_at</a>   | -2.0558 | -1.9380 | 0.9427 | 0.26 | 0.00 |
| NA                   | <a href="#">1395052_at</a>   | -1.8157 | -1.8998 | 1.0463 | 0.26 | 0.00 |
| NA                   | <a href="#">1380471_at</a>   | -2.2786 | -1.9000 | 0.8339 | 0.26 | 0.00 |
| RGD1564436_predicted | <a href="#">1382940_at</a>   | -1.7925 | -1.9474 | 1.0864 | 0.26 | 0.00 |
| RGD1560859_predicted | <a href="#">1372418_at</a>   | -1.6793 | -2.3861 | 1.4209 | 0.27 | 0.00 |
| RGD1310552_predicted | <a href="#">1374574_at</a>   | -1.7786 | -2.2286 | 1.2530 | 0.27 | 0.00 |
| Nebi_predicted       | <a href="#">1389532_at</a>   | -1.7962 | -2.2373 | 1.2456 | 0.27 | 0.00 |
| NA                   | <a href="#">1396426_at</a>   | -1.9516 | -2.0116 | 1.0307 | 0.27 | 0.00 |
| Tmem86a_predicted    | <a href="#">1390847_at</a>   | -1.6835 | -1.9079 | 1.1333 | 0.27 | 0.00 |
| Tagln                | <a href="#">1367570_at</a>   | -2.1773 | -1.9003 | 0.8728 | 0.27 | 0.00 |
| LOC678810            | <a href="#">1390227_at</a>   | -1.9748 | -1.9214 | 0.9730 | 0.27 | 0.00 |
| Nrtn                 | <a href="#">1374048_at</a>   | -1.7414 | -2.2362 | 1.2841 | 0.27 | 0.00 |
| LOC684884            | <a href="#">1386049_at</a>   | -1.6828 | -2.2625 | 1.3444 | 0.27 | 0.00 |
| Eps8l1_predicted     | <a href="#">1384079_at</a>   | -1.8011 | -2.1147 | 1.1741 | 0.27 | 0.00 |
| NA                   | <a href="#">1378262_at</a>   | -1.9921 | -1.9134 | 0.9605 | 0.27 | 0.00 |
| Cmtm8                | <a href="#">1374491_at</a>   | -1.8753 | -2.0426 | 1.0892 | 0.27 | 0.00 |
| Apeg1                | <a href="#">1368001_at</a>   | -1.9846 | -1.8563 | 0.9354 | 0.27 | 0.00 |
| LOC681869            | <a href="#">1381223_at</a>   | -1.8459 | -2.0216 | 1.0952 | 0.27 | 0.00 |
| Tlcd1                | <a href="#">1391559_at</a>   | -1.9208 | -1.9772 | 1.0293 | 0.28 | 0.00 |
| Hspa1b               | <a href="#">1370912_at</a>   | -1.8946 | -1.9669 | 1.0382 | 0.28 | 0.00 |
| Cyb5r2               | <a href="#">1391430_at</a>   | -1.7445 | -1.8485 | 1.0597 | 0.28 | 0.00 |
| LOC680367            | <a href="#">1370349_a_at</a> | -1.1830 | -1.5342 | 1.2969 | 0.28 | 0.14 |
| Ryr3                 | <a href="#">1398479_at</a>   | -2.0301 | -1.8511 | 0.9118 | 0.28 | 0.00 |
| NA                   | <a href="#">1382964_at</a>   | -1.8141 | -1.9293 | 1.0635 | 0.28 | 0.00 |
| NA                   | <a href="#">1385701_at</a>   | -1.8609 | -1.8486 | 0.9934 | 0.28 | 0.00 |
| Actg2                | <a href="#">1386869_at</a>   | -2.0588 | -1.8504 | 0.8988 | 0.28 | 0.00 |
| LOC681869            | <a href="#">1395466_at</a>   | -1.6991 | -2.1418 | 1.2605 | 0.28 | 0.00 |
| RGD1310552_predicted | <a href="#">1393352_at</a>   | -1.6921 | -2.1690 | 1.2818 | 0.28 | 0.00 |
| RGD1307150_predicted | <a href="#">1371677_at</a>   | -1.7527 | -1.7709 | 1.0104 | 0.28 | 0.00 |
| NA                   | <a href="#">1377423_at</a>   | -1.8842 | -1.9582 | 1.0393 | 0.28 | 0.00 |
| RT1-Aw2              | <a href="#">1394803_at</a>   | -1.2875 | -1.6825 | 1.3068 | 0.28 | 0.09 |
| Gpr64                | <a href="#">1382967_at</a>   | -1.9762 | -1.8677 | 0.9451 | 0.28 | 0.00 |
| Lrat                 | <a href="#">1368570_at</a>   | -1.8550 | -1.8102 | 0.9759 | 0.28 | 0.00 |
| Dnah1                | <a href="#">1381039_at</a>   | -1.7300 | -2.0490 | 1.1844 | 0.28 | 0.00 |
| Fcer1a               | <a href="#">1387713_a_at</a> | -1.7956 | -1.9626 | 1.0930 | 0.28 | 0.00 |
| NA                   | <a href="#">1376457_at</a>   | -1.5301 | -1.9945 | 1.3035 | 0.28 | 0.05 |
| NA                   | <a href="#">1391544_at</a>   | -1.6923 | -2.2064 | 1.3038 | 0.28 | 0.00 |
| LOC679990            | <a href="#">1374969_at</a>   | -1.9073 | -1.8044 | 0.9461 | 0.29 | 0.00 |
| NA                   | <a href="#">1381350_at</a>   | -1.9544 | -1.8310 | 0.9369 | 0.29 | 0.00 |
| NA                   | <a href="#">1394394_at</a>   | -1.8434 | -1.7566 | 0.9529 | 0.29 | 0.00 |
| Kcnma1               | <a href="#">1372929_at</a>   | -1.7130 | -1.7437 | 1.0179 | 0.29 | 0.00 |
| LOC678810            | <a href="#">1390912_at</a>   | -1.7861 | -1.8547 | 1.0384 | 0.29 | 0.00 |
| Mylk_predicted       | <a href="#">1371541_at</a>   | -2.1379 | -1.7966 | 0.8404 | 0.29 | 0.00 |
| Ryr2                 | <a href="#">1382088_at</a>   | -2.0769 | -1.8181 | 0.8754 | 0.29 | 0.00 |
| Finc_predicted       | <a href="#">1388496_at</a>   | -1.9896 | -1.7792 | 0.8943 | 0.29 | 0.00 |
| P2rx2                | <a href="#">1369474_a_at</a> | -2.2001 | -1.7794 | 0.8088 | 0.29 | 0.00 |
| Susd2_predicted      | <a href="#">1398511_at</a>   | -1.7535 | -1.9076 | 1.0879 | 0.29 | 0.00 |
| LOC363458            | <a href="#">1384276_at</a>   | -1.8950 | -1.7415 | 0.9190 | 0.29 | 0.00 |
| Mrc2_predicted       | <a href="#">1382659_at</a>   | -2.0502 | -1.7972 | 0.8766 | 0.29 | 0.00 |
| Ubl3                 | <a href="#">1383223_at</a>   | -1.8581 | -1.8114 | 0.9749 | 0.30 | 0.00 |

|                      |                              |         |         |        |      |      |
|----------------------|------------------------------|---------|---------|--------|------|------|
| NA                   | <a href="#">1390913 at</a>   | -1.6641 | -2.0777 | 1.2485 | 0.30 | 0.05 |
| RGD1305081_predicted | <a href="#">1375756 at</a>   | -1.9866 | -1.7479 | 0.8798 | 0.30 | 0.00 |
| Akr1c18              | <a href="#">1387958 at</a>   | -1.6214 | -2.0276 | 1.2505 | 0.30 | 0.05 |
| Kprp                 | <a href="#">1378449 at</a>   | -1.5252 | -2.1518 | 1.4108 | 0.30 | 0.05 |
| Tm4sf4               | <a href="#">1368706 at</a>   | -1.4678 | -2.2483 | 1.5318 | 0.30 | 0.05 |
| NA                   | <a href="#">1384709 at</a>   | -1.8900 | -1.7728 | 0.9380 | 0.30 | 0.00 |
| NA                   | <a href="#">1383914 at</a>   | -1.9678 | -1.6846 | 0.8561 | 0.30 | 0.00 |
| Amigo2               | <a href="#">1373345 at</a>   | -1.8530 | -1.6803 | 0.9068 | 0.31 | 0.00 |
| Ube1dc1              | <a href="#">1396134 at</a>   | -1.9490 | -1.6751 | 0.8595 | 0.31 | 0.00 |
| Mcpt10               | <a href="#">1371164 at</a>   | -1.5745 | -1.9451 | 1.2354 | 0.31 | 0.05 |
| Crispld2             | <a href="#">1387922 at</a>   | -1.5242 | -1.8320 | 1.2019 | 0.31 | 0.05 |
| NA                   | <a href="#">1373886 at</a>   | -1.8893 | -1.7040 | 0.9019 | 0.31 | 0.00 |
| Lnx1_predicted       | <a href="#">1389464 at</a>   | -1.5843 | -1.9553 | 1.2342 | 0.31 | 0.05 |
| NA                   | <a href="#">1372390 at</a>   | -1.6545 | -1.7142 | 1.0361 | 0.31 | 0.05 |
| NA                   | <a href="#">1374121 at</a>   | -1.9041 | -1.6644 | 0.8741 | 0.31 | 0.00 |
| Lims2                | <a href="#">1388422 at</a>   | -1.7367 | -1.6873 | 0.9716 | 0.31 | 0.00 |
| Slc15a1              | <a href="#">1369381 a at</a> | -1.5559 | -2.4487 | 1.5739 | 0.31 | 0.05 |
| NA                   | <a href="#">1383838 at</a>   | -1.5785 | -1.9846 | 1.2572 | 0.31 | 0.05 |
| LOC301121            | <a href="#">1391184 at</a>   | -1.7351 | -1.6755 | 0.9656 | 0.31 | 0.00 |
| Aldh3a1              | <a href="#">1368130 at</a>   | -1.6775 | -1.8775 | 1.1193 | 0.31 | 0.00 |
| NA                   | <a href="#">1371089 at</a>   | -1.5797 | -1.7860 | 1.1306 | 0.31 | 0.05 |
| Wdr59                | <a href="#">1393808 at</a>   | -1.5141 | -1.5760 | 1.0409 | 0.31 | 0.05 |
| Fmpd1_predicted      | <a href="#">1377693 at</a>   | -1.7040 | -1.8946 | 1.1118 | 0.31 | 0.00 |
| LOC684884            | <a href="#">1396388 at</a>   | -1.5166 | -2.0181 | 1.3307 | 0.31 | 0.05 |
| Cyp2a3a              | <a href="#">1369136 at</a>   | -1.6463 | -1.5881 | 0.9646 | 0.31 | 0.05 |
| Hspa2                | <a href="#">1394200 at</a>   | -1.8056 | -1.7143 | 0.9495 | 0.31 | 0.00 |
| NA                   | <a href="#">1378258 at</a>   | -1.8579 | -1.6636 | 0.8955 | 0.31 | 0.00 |
| NA                   | <a href="#">1374830 at</a>   | -1.7910 | -1.6864 | 0.9416 | 0.31 | 0.00 |
| Selenbp1             | <a href="#">1367673 at</a>   | -1.7490 | -1.7185 | 0.9825 | 0.32 | 0.00 |
| NA                   | <a href="#">1389242 at</a>   | -1.9527 | -1.6739 | 0.8572 | 0.32 | 0.00 |
| Alb                  | <a href="#">1367555 at</a>   | -0.9736 | -1.2844 | 1.3192 | 0.32 | 0.56 |
| Kif21a_predicted     | <a href="#">1381976 at</a>   | -1.7712 | -1.7944 | 1.0131 | 0.32 | 0.00 |
| LOC686098            | <a href="#">1385177 at</a>   | -1.9185 | -1.6660 | 0.8684 | 0.32 | 0.00 |
| Rnase1               | <a href="#">1393026 at</a>   | -1.5632 | -1.9823 | 1.2681 | 0.32 | 0.05 |
| RGD1310470           | <a href="#">1392556 at</a>   | -2.2177 | -1.6511 | 0.7445 | 0.32 | 0.00 |
| Tpm1                 | <a href="#">1370287 a at</a> | -2.0550 | -1.6350 | 0.7956 | 0.32 | 0.00 |
| NA                   | <a href="#">1378111 at</a>   | -1.8825 | -1.6554 | 0.8794 | 0.32 | 0.00 |
| NA                   | <a href="#">1383188 at</a>   | -1.7676 | -1.7648 | 0.9985 | 0.32 | 0.00 |
| LOC678910            | <a href="#">1383713 at</a>   | -1.6951 | -1.7266 | 1.0186 | 0.32 | 0.00 |
| Padi1                | <a href="#">1387150 at</a>   | -1.6458 | -1.6376 | 0.9950 | 0.32 | 0.05 |
| Hspa2                | <a href="#">1369841 at</a>   | -1.7129 | -1.5890 | 0.9276 | 0.32 | 0.00 |
| Des                  | <a href="#">1367600 at</a>   | -1.8537 | -1.6667 | 0.8991 | 0.32 | 0.00 |
| Filip1               | <a href="#">1379463 at</a>   | -1.7209 | -1.5932 | 0.9258 | 0.32 | 0.00 |
| NA                   | <a href="#">1391293 at</a>   | -2.1226 | -1.6211 | 0.7637 | 0.32 | 0.00 |
| NA                   | <a href="#">1380143 at</a>   | -1.5162 | -1.9371 | 1.2776 | 0.33 | 0.05 |
| Fmo3                 | <a href="#">1368304 at</a>   | -1.6191 | -1.6927 | 1.0454 | 0.33 | 0.05 |
| Slc39a2_predicted    | <a href="#">1380356 at</a>   | -1.8438 | -1.5862 | 0.8603 | 0.33 | 0.00 |
| Hspb8                | <a href="#">1388721 at</a>   | -1.5372 | -1.5641 | 1.0175 | 0.33 | 0.05 |
| Dpyd                 | <a href="#">1367994 at</a>   | -1.5726 | -1.8387 | 1.1692 | 0.33 | 0.05 |
| NA                   | <a href="#">1379467 at</a>   | -1.3965 | -1.5519 | 1.1113 | 0.33 | 0.06 |
| Tspyl4               | <a href="#">1390097 at</a>   | -1.9536 | -1.5916 | 0.8147 | 0.33 | 0.00 |
| Cyp2b13              | <a href="#">1387993 at</a>   | -0.7468 | -1.1730 | 1.5706 | 0.33 | 1.34 |
| NA                   | <a href="#">1391331 at</a>   | -1.5899 | -1.7518 | 1.1018 | 0.33 | 0.05 |
| NA                   | <a href="#">1385845 at</a>   | -1.9296 | -1.5915 | 0.8248 | 0.33 | 0.00 |
| Mylk_predicted       | <a href="#">1384818 at</a>   | -1.6426 | -1.6263 | 0.9901 | 0.33 | 0.05 |

|                      |                              |         |         |        |      |      |
|----------------------|------------------------------|---------|---------|--------|------|------|
| Tns                  | <a href="#">1385704_at</a>   | -1.6690 | -1.6174 | 0.9691 | 0.33 | 0.05 |
| NA                   | <a href="#">1384310_at</a>   | -1.8817 | -1.5765 | 0.8378 | 0.33 | 0.00 |
| Ide                  | <a href="#">1381097_at</a>   | -1.6517 | -1.6925 | 1.0247 | 0.33 | 0.05 |
| NA                   | <a href="#">1390240_at</a>   | -1.6093 | -1.7001 | 1.0564 | 0.33 | 0.05 |
| Slc6a4               | <a href="#">1368348_at</a>   | -1.8550 | -1.6140 | 0.8701 | 0.33 | 0.00 |
| RGD1561831_predicted | <a href="#">1378675_at</a>   | -1.7625 | -1.6423 | 0.9318 | 0.34 | 0.00 |
| Lrrc28_predicted     | <a href="#">1375419_at</a>   | -1.8677 | -1.5676 | 0.8393 | 0.34 | 0.00 |
| Nkd1_predicted       | <a href="#">1382726_at</a>   | -1.8490 | -1.6033 | 0.8671 | 0.34 | 0.00 |
| Hspb8                | <a href="#">1387282_at</a>   | -1.4715 | -1.4650 | 0.9956 | 0.34 | 0.05 |
| Rims1                | <a href="#">1369332_a_at</a> | -1.7476 | -1.5623 | 0.8940 | 0.34 | 0.00 |
| Frzb                 | <a href="#">1373615_at</a>   | -1.3701 | -1.5239 | 1.1123 | 0.34 | 0.07 |
| Ppp1r14a             | <a href="#">1367813_at</a>   | -1.5209 | -1.4863 | 0.9772 | 0.34 | 0.05 |
| RGD1564935_predicted | <a href="#">1381219_at</a>   | -1.6155 | -1.5510 | 0.9601 | 0.34 | 0.05 |
| NA                   | <a href="#">1378883_at</a>   | -1.4936 | -1.7509 | 1.1723 | 0.34 | 0.05 |
| Id4                  | <a href="#">1385923_at</a>   | -1.7457 | -1.5739 | 0.9016 | 0.34 | 0.00 |
| NA                   | <a href="#">1383939_at</a>   | -1.6862 | -1.5941 | 0.9454 | 0.34 | 0.00 |
| RGD1565626_predicted | <a href="#">1379079_at</a>   | -1.2796 | -1.9309 | 1.5089 | 0.34 | 0.09 |
| NA                   | <a href="#">1396405_at</a>   | -1.5188 | -1.4933 | 0.9832 | 0.34 | 0.05 |
| Clu                  | <a href="#">1367784_a_at</a> | -1.6080 | -1.8001 | 1.1195 | 0.34 | 0.05 |
| Magi3                | <a href="#">1398866_at</a>   | -1.7494 | -1.6025 | 0.9161 | 0.34 | 0.00 |
| Wnk4                 | <a href="#">1389662_at</a>   | -1.9021 | -1.5460 | 0.8128 | 0.34 | 0.00 |
| NA                   | <a href="#">1377818_at</a>   | -1.7707 | -1.5917 | 0.8989 | 0.34 | 0.00 |
| RGD1307081           | <a href="#">1394309_at</a>   | -1.7233 | -1.5998 | 0.9283 | 0.34 | 0.00 |
| LOC682044            | <a href="#">1385687_at</a>   | -1.6084 | -1.6835 | 1.0467 | 0.34 | 0.05 |
| Acsbg1               | <a href="#">1367923_at</a>   | -1.5175 | -1.7488 | 1.1524 | 0.34 | 0.05 |
| Pcp4                 | <a href="#">1368145_at</a>   | -1.9100 | -1.5357 | 0.8041 | 0.34 | 0.00 |
| Lmod1_predicted      | <a href="#">1374237_at</a>   | -1.6085 | -1.5801 | 0.9823 | 0.34 | 0.05 |
| Dtna_predicted       | <a href="#">1380964_at</a>   | -1.8619 | -1.5601 | 0.8379 | 0.34 | 0.00 |
| NA                   | <a href="#">1385569_at</a>   | -1.4656 | -1.6834 | 1.1487 | 0.34 | 0.05 |
| RGD1311155           | <a href="#">1373970_at</a>   | -1.7419 | -1.5208 | 0.8731 | 0.34 | 0.00 |
| NA                   | <a href="#">1393437_at</a>   | -1.5960 | -1.6313 | 1.0221 | 0.35 | 0.05 |
| NA                   | <a href="#">1380799_at</a>   | -1.6887 | -1.5981 | 0.9464 | 0.35 | 0.00 |
| Calm4_predicted      | <a href="#">1373317_at</a>   | -1.4559 | -1.8017 | 1.2375 | 0.35 | 0.05 |
| Cyp2f2               | <a href="#">1368608_at</a>   | -1.5134 | -1.7359 | 1.1470 | 0.35 | 0.05 |
| Id4                  | <a href="#">1375183_at</a>   | -1.7719 | -1.5396 | 0.8689 | 0.35 | 0.00 |
| NA                   | <a href="#">1378163_at</a>   | -1.7522 | -1.5713 | 0.8968 | 0.35 | 0.00 |
| Gjb1                 | <a href="#">1387145_at</a>   | -1.8148 | -1.5516 | 0.8550 | 0.35 | 0.00 |
| NA                   | <a href="#">1388795_at</a>   | -1.2895 | -1.4689 | 1.1392 | 0.35 | 0.09 |
| Acsbg1               | <a href="#">1392182_at</a>   | -1.5027 | -1.4948 | 0.9947 | 0.35 | 0.05 |
| NA                   | <a href="#">1380209_at</a>   | -1.5360 | -1.6769 | 1.0917 | 0.35 | 0.05 |
| NA                   | <a href="#">1379358_at</a>   | -1.5551 | -1.6069 | 1.0333 | 0.35 | 0.05 |
| NA                   | <a href="#">1384250_a_at</a> | -1.8113 | -1.5087 | 0.8329 | 0.35 | 0.00 |
| Tpm1                 | <a href="#">1379936_at</a>   | -1.7632 | -1.4848 | 0.8421 | 0.35 | 0.00 |
| Nr4a3                | <a href="#">1393389_at</a>   | -1.6006 | -1.4475 | 0.9044 | 0.35 | 0.05 |
| Cited4               | <a href="#">1370225_at</a>   | -1.2643 | -1.6035 | 1.2682 | 0.35 | 0.11 |
| NA                   | <a href="#">1378414_at</a>   | -1.5391 | -1.6379 | 1.0642 | 0.35 | 0.05 |
| NA                   | <a href="#">1388935_at</a>   | -1.6504 | -1.4714 | 0.8915 | 0.35 | 0.05 |
| LOC680039            | <a href="#">1390023_at</a>   | -1.7040 | -1.5260 | 0.8956 | 0.35 | 0.00 |
| NA                   | <a href="#">1375959_at</a>   | -1.8986 | -1.4968 | 0.7884 | 0.36 | 0.00 |
| Calcoco1             | <a href="#">1370285_at</a>   | -1.7508 | -1.5189 | 0.8675 | 0.36 | 0.00 |
| Rptn_predicted       | <a href="#">1377775_at</a>   | -1.4041 | -1.7558 | 1.2504 | 0.36 | 0.06 |
| LOC301118            | <a href="#">1393660_at</a>   | -1.4828 | -1.6333 | 1.1015 | 0.36 | 0.05 |
| RGD1565759_predicted | <a href="#">1383704_at</a>   | -1.5676 | -1.6366 | 1.0440 | 0.36 | 0.05 |
| Gfpt2                | <a href="#">1377761_at</a>   | -1.0935 | -1.2834 | 1.1737 | 0.36 | 0.29 |
| St5_predicted        | <a href="#">1373288_at</a>   | -1.9075 | -1.4791 | 0.7754 | 0.36 | 0.00 |

|                      |                              |         |         |        |      |      |
|----------------------|------------------------------|---------|---------|--------|------|------|
| NA                   | <a href="#">1383460_at</a>   | -1.4968 | -1.4071 | 0.9401 | 0.36 | 0.05 |
| LOC686587            | <a href="#">1388398_at</a>   | -1.6559 | -1.4616 | 0.8827 | 0.36 | 0.05 |
| Arg1                 | <a href="#">1368266_at</a>   | -0.9212 | -1.2618 | 1.3697 | 0.36 | 0.70 |
| Ecm1                 | <a href="#">1388698_at</a>   | -1.5421 | -1.5799 | 1.0246 | 0.36 | 0.05 |
| Slc24a3              | <a href="#">1376165_at</a>   | -1.7129 | -1.4584 | 0.8515 | 0.36 | 0.00 |
| NA                   | <a href="#">1383632_at</a>   | -1.7038 | -1.5058 | 0.8838 | 0.36 | 0.00 |
| Il1a                 | <a href="#">1368592_at</a>   | -1.3955 | -1.3845 | 0.9921 | 0.36 | 0.06 |
| NA                   | <a href="#">1397901_at</a>   | -1.7090 | -1.4985 | 0.8768 | 0.37 | 0.00 |
| NA                   | <a href="#">1394290_at</a>   | -1.4716 | -1.5771 | 1.0718 | 0.37 | 0.05 |
| Tns                  | <a href="#">1371954_at</a>   | -1.6543 | -1.4197 | 0.8582 | 0.37 | 0.05 |
| Cgn_predicted        | <a href="#">1384143_at</a>   | -1.5291 | -1.5603 | 1.0204 | 0.37 | 0.05 |
| RGD1561067_predicted | <a href="#">1372380_at</a>   | -1.6037 | -1.4050 | 0.8761 | 0.37 | 0.05 |
| Acta2                | <a href="#">1370857_at</a>   | -1.7950 | -1.4342 | 0.7990 | 0.37 | 0.00 |
| LOC687609            | <a href="#">1390513_at</a>   | -1.5113 | -1.4912 | 0.9867 | 0.37 | 0.05 |
| NA                   | <a href="#">1377266_at</a>   | -1.6265 | -1.4731 | 0.9057 | 0.37 | 0.05 |
| Kcnd3                | <a href="#">1369144_a_at</a> | -1.3731 | -1.4652 | 1.0671 | 0.37 | 0.06 |
| Asah2                | <a href="#">1369406_at</a>   | -1.5838 | -1.4842 | 0.9371 | 0.37 | 0.05 |
| LOC303730            | <a href="#">1374978_at</a>   | -1.4658 | -1.6615 | 1.1335 | 0.37 | 0.05 |
| Slc9a3               | <a href="#">1387542_at</a>   | -1.4550 | -2.0855 | 1.4334 | 0.37 | 0.05 |
| Ace2                 | <a href="#">1380962_at</a>   | -1.3780 | -1.7088 | 1.2401 | 0.37 | 0.06 |
| Egln3                | <a href="#">1368174_at</a>   | -1.6200 | -1.4873 | 0.9180 | 0.37 | 0.05 |
| Sod3                 | <a href="#">1368322_at</a>   | -1.4263 | -1.3876 | 0.9728 | 0.37 | 0.06 |
| NA                   | <a href="#">1390512_at</a>   | -1.4795 | -1.5245 | 1.0304 | 0.37 | 0.05 |
| Nr4a3                | <a href="#">1369067_at</a>   | -1.5507 | -1.4298 | 0.9220 | 0.37 | 0.05 |
| NA                   | <a href="#">1393356_at</a>   | -1.6600 | -1.4113 | 0.8502 | 0.37 | 0.05 |
| Efna3                | <a href="#">1390763_at</a>   | -1.6322 | -1.4732 | 0.9026 | 0.37 | 0.05 |
| Cpa6_predicted       | <a href="#">1384454_at</a>   | -1.4623 | -1.3532 | 0.9254 | 0.37 | 0.05 |
| Ncam1                | <a href="#">1383686_at</a>   | -1.4454 | -1.4703 | 1.0173 | 0.37 | 0.05 |
| LOC499814            | <a href="#">1378324_at</a>   | -1.3807 | -1.7237 | 1.2485 | 0.37 | 0.06 |
| LOC691246            | <a href="#">1374311_at</a>   | -1.7750 | -1.4322 | 0.8068 | 0.37 | 0.00 |
| Cpt1a                | <a href="#">1382882_x_at</a> | -1.2793 | -1.3366 | 1.0448 | 0.37 | 0.09 |
| NA                   | <a href="#">1378292_at</a>   | -1.4929 | -1.4800 | 0.9913 | 0.37 | 0.05 |
| Nkx6-1               | <a href="#">1368998_at</a>   | -1.5469 | -1.3845 | 0.8950 | 0.38 | 0.05 |
| Dmpk_predicted       | <a href="#">1373915_at</a>   | -1.5202 | -1.4097 | 0.9273 | 0.38 | 0.05 |
| Hspa1a               | <a href="#">1368247_at</a>   | -1.5729 | -1.4187 | 0.9020 | 0.38 | 0.05 |
| LOC680021            | <a href="#">1373337_at</a>   | -1.5637 | -1.4625 | 0.9353 | 0.38 | 0.05 |
| Il1a                 | <a href="#">1371170_a_at</a> | -1.2877 | -1.3057 | 1.0140 | 0.38 | 0.09 |
| NA                   | <a href="#">1386466_at</a>   | -1.5414 | -1.4902 | 0.9668 | 0.38 | 0.05 |
| Nexn                 | <a href="#">1370697_a_at</a> | -1.4032 | -1.3694 | 0.9759 | 0.38 | 0.06 |
| Hspb6                | <a href="#">1387898_at</a>   | -1.4513 | -1.4033 | 0.9669 | 0.38 | 0.05 |
| Plagl1               | <a href="#">1387122_at</a>   | -1.3441 | -1.3276 | 0.9877 | 0.38 | 0.07 |
| NA                   | <a href="#">1392034_at</a>   | -1.6891 | -1.4047 | 0.8316 | 0.38 | 0.00 |
| NA                   | <a href="#">1388452_at</a>   | -1.4204 | -1.3305 | 0.9367 | 0.38 | 0.06 |
| Nexn                 | <a href="#">1370854_at</a>   | -1.4579 | -1.3742 | 0.9426 | 0.38 | 0.05 |
| Bmp6                 | <a href="#">1388201_at</a>   | -1.6998 | -1.4188 | 0.8347 | 0.38 | 0.00 |
| NA                   | <a href="#">1378645_at</a>   | -1.3966 | -1.4015 | 1.0036 | 0.38 | 0.06 |
| RGD1560745_predicted | <a href="#">1393281_at</a>   | -1.4267 | -1.3521 | 0.9477 | 0.38 | 0.06 |
| LOC502020            | <a href="#">1393177_at</a>   | -1.4754 | -1.5166 | 1.0279 | 0.38 | 0.05 |
| Map1b                | <a href="#">1395357_at</a>   | -1.4664 | -1.3365 | 0.9114 | 0.38 | 0.05 |
| Hsd17b2              | <a href="#">1387156_at</a>   | -1.3479 | -1.4785 | 1.0968 | 0.38 | 0.07 |
| Adh7                 | <a href="#">1369072_at</a>   | -1.3885 | -1.5258 | 1.0988 | 0.39 | 0.06 |
| Abat                 | <a href="#">1369799_at</a>   | -1.3570 | -1.5229 | 1.1222 | 0.39 | 0.07 |
| Cryab                | <a href="#">1370026_at</a>   | -1.3183 | -1.3751 | 1.0431 | 0.39 | 0.07 |
| RGD1561067_predicted | <a href="#">1375898_at</a>   | -1.6017 | -1.3627 | 0.8507 | 0.39 | 0.05 |
| Egr3                 | <a href="#">1392791_at</a>   | -1.5046 | -1.3782 | 0.9160 | 0.39 | 0.05 |

|                      |                              |         |         |        |      |      |
|----------------------|------------------------------|---------|---------|--------|------|------|
| LOC680451            | <a href="#">1374417_at</a>   | -1.6903 | -1.3861 | 0.8200 | 0.39 | 0.00 |
| NA                   | <a href="#">1378555_at</a>   | -1.6332 | -1.3676 | 0.8374 | 0.39 | 0.05 |
| NA                   | <a href="#">1383211_at</a>   | -0.9098 | -1.2473 | 1.3710 | 0.39 | 0.70 |
| NA                   | <a href="#">1380470_x_at</a> | -1.5708 | -1.3662 | 0.8698 | 0.39 | 0.05 |
| Gpc3                 | <a href="#">1368395_at</a>   | -1.4213 | -1.3475 | 0.9480 | 0.39 | 0.06 |
| LOC362774            | <a href="#">1376174_at</a>   | -1.4324 | -1.3372 | 0.9335 | 0.39 | 0.06 |
| NA                   | <a href="#">1384980_at</a>   | -1.3004 | -1.6029 | 1.2327 | 0.39 | 0.09 |
| Clic3                | <a href="#">1374630_at</a>   | -1.3672 | -1.5088 | 1.1036 | 0.39 | 0.07 |
| NA                   | <a href="#">1392126_at</a>   | -1.4693 | -1.3212 | 0.8992 | 0.39 | 0.05 |
| Dscr111              | <a href="#">1389066_at</a>   | -1.3407 | -1.3435 | 1.0021 | 0.39 | 0.07 |
| Gpsm1                | <a href="#">1372383_at</a>   | -1.3580 | -1.5482 | 1.1400 | 0.39 | 0.07 |
| NA                   | <a href="#">1392364_at</a>   | -1.4148 | -1.4943 | 1.0562 | 0.39 | 0.06 |
| Mtap2                | <a href="#">1388152_at</a>   | -1.3263 | -1.3669 | 1.0307 | 0.39 | 0.07 |
| Abcg4                | <a href="#">1376172_at</a>   | -1.4895 | -1.4132 | 0.9488 | 0.39 | 0.05 |
| LOC683263            | <a href="#">1376736_at</a>   | -1.4835 | -1.3194 | 0.8894 | 0.39 | 0.05 |
| LOC686098            | <a href="#">1374263_at</a>   | -1.4232 | -1.3009 | 0.9140 | 0.39 | 0.06 |
| Ide                  | <a href="#">1387652_at</a>   | -1.4988 | -1.4050 | 0.9374 | 0.39 | 0.05 |
| Slc19a2              | <a href="#">1390863_at</a>   | -1.5764 | -1.3517 | 0.8575 | 0.40 | 0.05 |
| RGD1308319_predicted | <a href="#">1376104_at</a>   | -1.5786 | -1.3292 | 0.8420 | 0.40 | 0.05 |
| Zfp692_predicted     | <a href="#">1379342_at</a>   | -1.5667 | -1.3683 | 0.8733 | 0.40 | 0.05 |
| Fhl1                 | <a href="#">1394750_at</a>   | -1.6036 | -1.3168 | 0.8212 | 0.40 | 0.05 |
| Slc34a3              | <a href="#">1384838_at</a>   | -1.4544 | -1.4027 | 0.9644 | 0.40 | 0.05 |
| Lynx1_predicted      | <a href="#">1376184_at</a>   | -1.3440 | -1.4824 | 1.1030 | 0.40 | 0.07 |
| NA                   | <a href="#">1391871_at</a>   | -1.6146 | -1.3399 | 0.8298 | 0.40 | 0.05 |
| Ar                   | <a href="#">1369159_at</a>   | -1.4824 | -1.3132 | 0.8858 | 0.40 | 0.05 |
| Bhlhb3               | <a href="#">1368511_at</a>   | -0.9688 | -1.2607 | 1.3013 | 0.40 | 0.56 |
| NA                   | <a href="#">1392012_at</a>   | -1.3606 | -1.2978 | 0.9538 | 0.40 | 0.07 |
| Fhl1                 | <a href="#">1390049_at</a>   | -1.0939 | -1.2634 | 1.1549 | 0.40 | 0.29 |
| Tmprss2              | <a href="#">1373329_at</a>   | -1.6264 | -1.3250 | 0.8147 | 0.40 | 0.05 |
| Smpd3                | <a href="#">1368991_at</a>   | -1.3515 | -1.5913 | 1.1774 | 0.40 | 0.07 |
| NA                   | <a href="#">1383253_at</a>   | -1.5728 | -1.3604 | 0.8649 | 0.40 | 0.05 |
| Col4a5_predicted     | <a href="#">1374705_at</a>   | -1.3261 | -1.3380 | 1.0089 | 0.40 | 0.07 |
| Tmem106a             | <a href="#">1374948_at</a>   | -1.5737 | -1.3353 | 0.8485 | 0.40 | 0.05 |
| Cyp26b1              | <a href="#">1376667_at</a>   | -1.6011 | -1.3261 | 0.8282 | 0.40 | 0.05 |
| Igfbp6               | <a href="#">1387625_at</a>   | -1.1238 | -1.3619 | 1.2118 | 0.40 | 0.16 |
| Smtn                 | <a href="#">1396885_at</a>   | -1.3728 | -1.3016 | 0.9481 | 0.40 | 0.06 |
| Tob1                 | <a href="#">1368132_at</a>   | -1.4645 | -1.3808 | 0.9428 | 0.40 | 0.05 |
| Gpld1                | <a href="#">1380833_at</a>   | -1.3682 | -1.4715 | 1.0755 | 0.40 | 0.07 |
| Tgfb111              | <a href="#">1370887_at</a>   | -1.4425 | -1.2737 | 0.8830 | 0.40 | 0.05 |
| NA                   | <a href="#">1385983_at</a>   | -1.1837 | -1.4468 | 1.2222 | 0.40 | 0.14 |
| Sema6d_predicted     | <a href="#">1381968_at</a>   | -1.4554 | -1.3887 | 0.9542 | 0.41 | 0.05 |
| Rnf167               | <a href="#">1399065_at</a>   | -1.6419 | -1.2872 | 0.7840 | 0.41 | 0.05 |
| Cav                  | <a href="#">1370131_at</a>   | -1.2245 | -1.2403 | 1.0129 | 0.41 | 0.11 |
| Dbp                  | <a href="#">1387874_at</a>   | -1.0878 | -1.2615 | 1.1597 | 0.41 | 0.29 |
| Egfl9_predicted      | <a href="#">1384906_at</a>   | -1.6112 | -1.2826 | 0.7961 | 0.41 | 0.05 |
| NA                   | <a href="#">1372864_at</a>   | -1.4680 | -1.2813 | 0.8729 | 0.41 | 0.05 |
| MGC95155             | <a href="#">1393061_at</a>   | -1.2460 | -1.3861 | 1.1125 | 0.41 | 0.11 |
| NA                   | <a href="#">1398620_at</a>   | -1.3295 | -1.3879 | 1.0439 | 0.41 | 0.07 |
| NA                   | <a href="#">1380465_at</a>   | -1.3556 | -1.2689 | 0.9360 | 0.41 | 0.07 |
| Igfbp6               | <a href="#">1372168_s_at</a> | -1.1858 | -1.3968 | 1.1780 | 0.41 | 0.14 |
| NA                   | <a href="#">1376584_at</a>   | -1.3807 | -1.2585 | 0.9115 | 0.41 | 0.06 |
| Plekhc1              | <a href="#">1398327_at</a>   | -1.4011 | -1.2592 | 0.8987 | 0.41 | 0.06 |
| NA                   | <a href="#">1381015_at</a>   | -0.9182 | -1.0672 | 1.1623 | 0.41 | 0.70 |
| Creg_predicted       | <a href="#">1375428_at</a>   | -1.4764 | -1.3339 | 0.9034 | 0.41 | 0.05 |
| Sytl1                | <a href="#">1383792_at</a>   | -1.3769 | -1.3521 | 0.9820 | 0.41 | 0.06 |

|                      |                              |         |         |        |      |      |
|----------------------|------------------------------|---------|---------|--------|------|------|
| Dhtkd1               | <a href="#">1390172_at</a>   | -1.5809 | -1.3077 | 0.8272 | 0.41 | 0.05 |
| NA                   | <a href="#">1374774_at</a>   | -1.4626 | -1.3388 | 0.9154 | 0.41 | 0.05 |
| LOC687718            | <a href="#">1378040_at</a>   | -1.3419 | -1.3573 | 1.0115 | 0.41 | 0.07 |
| NA                   | <a href="#">1372111_at</a>   | -1.4181 | -1.2681 | 0.8942 | 0.41 | 0.06 |
| RGD1564833_predicted | <a href="#">1373652_at</a>   | -1.4473 | -1.2929 | 0.8933 | 0.41 | 0.05 |
| RGD1563465_predicted | <a href="#">1376311_at</a>   | -1.4385 | -1.3337 | 0.9271 | 0.41 | 0.05 |
| Bphl                 | <a href="#">1388617_at</a>   | -1.4241 | -1.3210 | 0.9276 | 0.41 | 0.06 |
| Irx3_predicted       | <a href="#">1390776_at</a>   | -1.1641 | -1.3394 | 1.1506 | 0.41 | 0.14 |
| Cyp4f6               | <a href="#">1387916_at</a>   | -1.5259 | -1.2855 | 0.8425 | 0.41 | 0.05 |
| Tns                  | <a href="#">1391390_at</a>   | -1.4961 | -1.2583 | 0.8411 | 0.41 | 0.05 |
| LOC310013            | <a href="#">1395689_at</a>   | -1.3792 | -1.2210 | 0.8853 | 0.41 | 0.06 |
| Nexn                 | <a href="#">1382229_at</a>   | -1.3394 | -1.2244 | 0.9142 | 0.41 | 0.07 |
| LOC304037            | <a href="#">1376411_at</a>   | -1.5389 | -1.2567 | 0.8167 | 0.42 | 0.05 |
| Hsd17b3              | <a href="#">1369553_at</a>   | -1.5324 | -1.2878 | 0.8404 | 0.42 | 0.05 |
| Sdccag33_predicted   | <a href="#">1380283_at</a>   | -1.4424 | -1.2757 | 0.8844 | 0.42 | 0.05 |
| Bmp3                 | <a href="#">1369773_at</a>   | -1.0878 | -1.1783 | 1.0832 | 0.42 | 0.29 |
| Hoxc5_predicted      | <a href="#">1393876_at</a>   | -1.3693 | -1.2940 | 0.9451 | 0.42 | 0.07 |
| LOC682100            | <a href="#">1382084_at</a>   | -1.4508 | -1.3135 | 0.9054 | 0.42 | 0.05 |
| Ndrg2                | <a href="#">1387121_a_at</a> | -1.4127 | -1.3075 | 0.9256 | 0.42 | 0.06 |
| Cry2                 | <a href="#">1372548_at</a>   | -1.5306 | -1.2458 | 0.8139 | 0.42 | 0.05 |
| Map1b                | <a href="#">1373363_at</a>   | -1.4172 | -1.2423 | 0.8766 | 0.42 | 0.06 |
| Itpr1                | <a href="#">1387907_at</a>   | -1.3770 | -1.3481 | 0.9790 | 0.42 | 0.06 |
| Mcam                 | <a href="#">1374933_at</a>   | -1.5148 | -1.2332 | 0.8141 | 0.42 | 0.05 |
| NA                   | <a href="#">1374667_at</a>   | -1.3480 | -1.2457 | 0.9241 | 0.42 | 0.07 |
| Tnfrsf17_predicted   | <a href="#">1384441_at</a>   | -1.4423 | -1.2484 | 0.8656 | 0.42 | 0.05 |
| Nefh                 | <a href="#">1370815_at</a>   | -1.0905 | -1.6506 | 1.5136 | 0.42 | 0.29 |
| Cdo1                 | <a href="#">1367755_at</a>   | -1.5535 | -1.2705 | 0.8178 | 0.42 | 0.05 |
| RGD1305645_predicted | <a href="#">1372646_at</a>   | -1.1028 | -1.1562 | 1.0484 | 0.42 | 0.16 |
| NA                   | <a href="#">1378233_at</a>   | -1.3251 | -1.2048 | 0.9092 | 0.42 | 0.07 |
| NA                   | <a href="#">1383770_at</a>   | -1.4519 | -1.2511 | 0.8617 | 0.42 | 0.05 |
| NA                   | <a href="#">1379859_at</a>   | -0.6409 | -0.8527 | 1.3305 | 0.42 | 1.73 |
| Osbpl1a              | <a href="#">1383633_at</a>   | -1.3314 | -1.3977 | 1.0498 | 0.42 | 0.07 |
| RGD1306676           | <a href="#">1384064_at</a>   | -1.2615 | -1.4480 | 1.1478 | 0.42 | 0.11 |
| Gpr137b_predicted    | <a href="#">1385025_a_at</a> | -1.3537 | -1.3245 | 0.9784 | 0.42 | 0.07 |
| Alad                 | <a href="#">1367720_at</a>   | -1.6376 | -1.2410 | 0.7578 | 0.42 | 0.05 |
| Id4                  | <a href="#">1375120_at</a>   | -1.3940 | -1.2764 | 0.9157 | 0.42 | 0.06 |
| NA                   | <a href="#">1384770_at</a>   | -1.4607 | -1.2167 | 0.8329 | 0.42 | 0.05 |
| RGD1309808_predicted | <a href="#">1372604_at</a>   | -1.3548 | -1.2644 | 0.9332 | 0.42 | 0.07 |
| Tst                  | <a href="#">1370881_at</a>   | -1.6693 | -1.2365 | 0.7407 | 0.42 | 0.05 |
| RGD1564779_predicted | <a href="#">1384160_at</a>   | -1.4728 | -1.2167 | 0.8261 | 0.42 | 0.05 |
| LOC682946            | <a href="#">1373963_at</a>   | -1.4322 | -1.2592 | 0.8792 | 0.42 | 0.06 |
| RGD1561090_predicted | <a href="#">1374591_at</a>   | -1.4603 | -1.2577 | 0.8613 | 0.43 | 0.05 |
| Adamts19_predicted   | <a href="#">1379586_at</a>   | -1.5994 | -1.2228 | 0.7645 | 0.43 | 0.05 |
| Serpinb7             | <a href="#">1369547_at</a>   | -1.3054 | -1.2937 | 0.9910 | 0.43 | 0.09 |
| MGC108776            | <a href="#">1390944_at</a>   | -1.2786 | -1.3871 | 1.0849 | 0.43 | 0.09 |
| Chrm3                | <a href="#">1387462_at</a>   | -1.4282 | -1.2275 | 0.8595 | 0.43 | 0.06 |
| Adamts9_predicted    | <a href="#">1376481_at</a>   | -1.3665 | -1.1957 | 0.8751 | 0.43 | 0.07 |
| Lnx1_predicted       | <a href="#">1385497_x_at</a> | -1.2683 | -1.3125 | 1.0349 | 0.43 | 0.09 |
| Elovl6               | <a href="#">1388108_at</a>   | -1.4379 | -1.2342 | 0.8583 | 0.43 | 0.05 |
| RGD1562284_predicted | <a href="#">1377867_at</a>   | -1.2465 | -1.3974 | 1.1210 | 0.43 | 0.11 |
| Geft                 | <a href="#">1372967_at</a>   | -1.4652 | -1.2110 | 0.8265 | 0.43 | 0.05 |
| NA                   | <a href="#">1392203_at</a>   | -1.4890 | -1.2450 | 0.8361 | 0.43 | 0.05 |
| Hdac11_predicted     | <a href="#">1374954_at</a>   | -1.4313 | -1.2379 | 0.8649 | 0.43 | 0.06 |
| Magi3                | <a href="#">1387753_s_at</a> | -1.4300 | -1.2493 | 0.8737 | 0.43 | 0.06 |
| Tcp1112              | <a href="#">1388471_at</a>   | -1.3864 | -1.2619 | 0.9102 | 0.43 | 0.06 |

|                      |                                     |         |         |        |      |      |
|----------------------|-------------------------------------|---------|---------|--------|------|------|
| Ms4a2                | <a href="#">1369399_at</a>          | -1.2694 | -1.2549 | 0.9886 | 0.43 | 0.09 |
| LOC684050            | <a href="#">1373368_at</a>          | -0.9585 | -1.1529 | 1.2028 | 0.43 | 0.56 |
| NA                   | <a href="#">1393703_at</a>          | -1.4858 | -1.2011 | 0.8084 | 0.43 | 0.05 |
| NA                   | <a href="#">1380558_at</a>          | -1.3203 | -1.3031 | 0.9870 | 0.43 | 0.07 |
| Ilvbl_predicted      | <a href="#">1373512_at</a>          | -1.3044 | -1.1834 | 0.9073 | 0.43 | 0.09 |
| RGD1310693_predicted | <a href="#">1391840_at</a>          | -1.4440 | -1.2491 | 0.8650 | 0.43 | 0.05 |
| Gucy1b3              | <a href="#">1395132_at</a>          | -1.3641 | -1.2413 | 0.9100 | 0.43 | 0.07 |
| NA                   | <a href="#">1377795_at</a>          | -1.3326 | -1.2279 | 0.9215 | 0.43 | 0.07 |
| Dst_predicted        | <a href="#">1395274_at</a>          | -1.4678 | -1.2091 | 0.8237 | 0.43 | 0.05 |
| NA                   | <a href="#">1372159_at</a>          | -1.5143 | -1.1935 | 0.7882 | 0.43 | 0.05 |
| NA                   | <a href="#">1380872_at</a>          | -1.3647 | -1.2072 | 0.8845 | 0.43 | 0.07 |
| Myoz2_predicted      | <a href="#">1371801_at</a>          | -1.2502 | -1.2431 | 0.9943 | 0.43 | 0.11 |
| RGD1564160_predicted | <a href="#">1377058_at</a>          | -1.0912 | -1.4713 | 1.3483 | 0.43 | 0.29 |
| Ckb                  | <a href="#">1367740_at</a>          | -1.3568 | -1.1847 | 0.8731 | 0.44 | 0.07 |
| Fbf1_predicted       | <a href="#">1389991_at</a>          | -0.8770 | -1.0912 | 1.2443 | 0.44 | 0.88 |
| NA                   | <a href="#">1383193_at</a>          | -1.3707 | -1.2198 | 0.8899 | 0.44 | 0.07 |
| Bdnf                 | <a href="#">1368677_at</a>          | -1.3180 | -1.1812 | 0.8962 | 0.44 | 0.07 |
| Efna3                | <a href="#">1384861_at</a>          | -1.3827 | -1.2008 | 0.8684 | 0.44 | 0.06 |
| Slc6a9               | <a href="#">1375266_at</a>          | -1.4556 | -1.2187 | 0.8372 | 0.44 | 0.05 |
| S100b                | <a href="#">1386903_at</a>          | -0.9488 | -1.0686 | 1.1263 | 0.44 | 0.56 |
| Taok1                | <a href="#">1388002_at</a>          | -1.4318 | -1.2175 | 0.8503 | 0.44 | 0.06 |
| RGD1311830_predicted | <a href="#">1371566_at</a>          | -1.2669 | -1.1544 | 0.9112 | 0.44 | 0.09 |
| LOC678766            | <a href="#">1389500_at</a>          | -1.2505 | -1.3390 | 1.0708 | 0.44 | 0.11 |
| Clu                  | <a href="#">1388246_at</a>          | -1.3127 | -1.2839 | 0.9781 | 0.44 | 0.09 |
| LOC304860            | <a href="#">1382874_at</a>          | -1.1389 | -1.4505 | 1.2736 | 0.44 | 0.16 |
| Dkk4_predicted       | <a href="#">1397684_at</a>          | -0.9137 | -1.1248 | 1.2310 | 0.44 | 0.70 |
|                      | 1/3/1900 <a href="#">1384285_at</a> | -1.2817 | -1.2528 | 0.9775 | 0.44 | 0.09 |
| RGD1309610_predicted | <a href="#">1379193_at</a>          | -1.4208 | -1.2135 | 0.8541 | 0.44 | 0.06 |
| Cmklr1               | <a href="#">1383304_at</a>          | -1.2785 | -1.1749 | 0.9190 | 0.44 | 0.09 |
| Hspb7                | <a href="#">1372649_at</a>          | -1.1380 | -1.1864 | 1.0426 | 0.44 | 0.16 |
| NA                   | <a href="#">1396455_at</a>          | -1.5003 | -1.1818 | 0.7877 | 0.44 | 0.05 |
| RT1-Ba               | <a href="#">1377334_at</a>          | -1.0828 | -2.2420 | 2.0706 | 0.44 | 0.29 |
| Pla2g3_predicted     | <a href="#">1384741_at</a>          | -1.1851 | -1.1080 | 0.9350 | 0.44 | 0.14 |
| LOC363060            | <a href="#">1374594_at</a>          | -1.3497 | -1.2321 | 0.9129 | 0.44 | 0.07 |
| RGD1559697_predicted | <a href="#">1380387_at</a>          | -1.3599 | -1.1791 | 0.8671 | 0.44 | 0.07 |
| NA                   | <a href="#">1371679_at</a>          | -1.3643 | -1.1957 | 0.8765 | 0.44 | 0.07 |
| Ogn_predicted        | <a href="#">1390450_a_at</a>        | -1.1867 | -1.2233 | 1.0309 | 0.44 | 0.14 |
| NA                   | <a href="#">1379336_at</a>          | -1.4116 | -1.1919 | 0.8444 | 0.44 | 0.06 |
| NA                   | <a href="#">1373223_at</a>          | -1.2923 | -1.1574 | 0.8956 | 0.45 | 0.09 |
| Thop1                | <a href="#">1370323_at</a>          | -1.2425 | -1.2240 | 0.9851 | 0.45 | 0.11 |
| RGD1310552_predicted | <a href="#">1382764_at</a>          | -1.1015 | -1.1073 | 1.0053 | 0.45 | 0.16 |
| P2ry14               | <a href="#">1370449_at</a>          | -1.3114 | -1.1340 | 0.8647 | 0.45 | 0.09 |
| Myadm                | <a href="#">1388453_at</a>          | -1.3699 | -1.1555 | 0.8435 | 0.45 | 0.07 |
| Osbpl1a              | <a href="#">1383830_a_at</a>        | -1.2736 | -1.2817 | 1.0063 | 0.45 | 0.09 |
| Gas7                 | <a href="#">1370963_at</a>          | -1.3484 | -1.1648 | 0.8638 | 0.45 | 0.07 |
| Rapgef4              | <a href="#">1371081_at</a>          | -1.2100 | -1.2191 | 1.0075 | 0.45 | 0.14 |
| NA                   | <a href="#">1373996_at</a>          | -1.2339 | -1.3062 | 1.0586 | 0.45 | 0.11 |
| Pcdh20_predicted     | <a href="#">1385229_at</a>          | -0.9294 | -1.0227 | 1.1003 | 0.45 | 0.70 |
| Glrp1_predicted      | <a href="#">1398708_at</a>          | -1.4003 | -1.1619 | 0.8298 | 0.45 | 0.06 |
| Rai14                | <a href="#">1389263_at</a>          | -1.3618 | -1.2053 | 0.8851 | 0.45 | 0.07 |
| Hoxc8                | <a href="#">1392183_at</a>          | -1.2219 | -1.1698 | 0.9574 | 0.45 | 0.11 |
| Tpm1                 | <a href="#">1390471_at</a>          | -1.4310 | -1.1426 | 0.7985 | 0.45 | 0.06 |
| NA                   | <a href="#">1379277_at</a>          | -1.3760 | -1.1852 | 0.8614 | 0.45 | 0.06 |
| RGD1310507           | <a href="#">1398577_at</a>          | -1.2415 | -1.3057 | 1.0517 | 0.45 | 0.11 |
| LOC691923            | <a href="#">1391707_at</a>          | -1.1736 | -1.2435 | 1.0596 | 0.45 | 0.14 |

|                      |                              |         |         |        |      |      |
|----------------------|------------------------------|---------|---------|--------|------|------|
| Flna_predicted       | <a href="#">1371382_at</a>   | -1.4431 | -1.1503 | 0.7971 | 0.45 | 0.05 |
| MGC109519            | <a href="#">1372219_at</a>   | -1.4430 | -1.1396 | 0.7897 | 0.45 | 0.05 |
| RGD1563869_predicted | <a href="#">1376465_at</a>   | -1.2384 | -1.2489 | 1.0085 | 0.45 | 0.11 |
| Dst_predicted        | <a href="#">1398598_at</a>   | -1.3716 | -1.1546 | 0.8418 | 0.45 | 0.07 |
| RGD1305176_predicted | <a href="#">1398245_at</a>   | -1.1365 | -1.1196 | 0.9851 | 0.45 | 0.16 |
| Tpm1                 | <a href="#">1370288_a_at</a> | -1.1828 | -1.1458 | 0.9687 | 0.45 | 0.14 |
| Mrgprf               | <a href="#">1382190_at</a>   | -1.2179 | -1.1169 | 0.9171 | 0.45 | 0.11 |
| Ubl3                 | <a href="#">1374413_at</a>   | -1.2912 | -1.2100 | 0.9371 | 0.45 | 0.09 |
| Barx1_predicted      | <a href="#">1380260_at</a>   | -1.0180 | -1.0507 | 1.0321 | 0.45 | 0.43 |
| Cldn3                | <a href="#">1368115_at</a>   | -1.4578 | -1.1388 | 0.7812 | 0.45 | 0.05 |
| RGD1305633_predicted | <a href="#">1370157_at</a>   | -1.1031 | -1.0611 | 0.9620 | 0.46 | 0.16 |
| Acadm                | <a href="#">1367702_at</a>   | -1.3995 | -1.1210 | 0.8010 | 0.46 | 0.06 |
| NA                   | <a href="#">1389150_at</a>   | -1.3568 | -1.1351 | 0.8366 | 0.46 | 0.07 |
| RGD1310444_predicted | <a href="#">1372805_at</a>   | -1.3095 | -1.1870 | 0.9064 | 0.46 | 0.09 |
| LOC362994            | <a href="#">1374768_at</a>   | -1.2496 | -1.1090 | 0.8875 | 0.46 | 0.11 |
| NA                   | <a href="#">1376371_at</a>   | -1.1601 | -1.3704 | 1.1813 | 0.46 | 0.16 |
| NA                   | <a href="#">1379647_at</a>   | -1.2062 | -1.2350 | 1.0239 | 0.46 | 0.14 |
| Tef                  | <a href="#">1390819_at</a>   | -1.1749 | -1.1573 | 0.9851 | 0.46 | 0.14 |
| NA                   | <a href="#">1388921_at</a>   | -1.1717 | -1.3067 | 1.1152 | 0.46 | 0.14 |
| Fmod                 | <a href="#">1367700_at</a>   | -0.9414 | -1.0032 | 1.0656 | 0.46 | 0.56 |
| Agpat4               | <a href="#">1368194_at</a>   | -0.9829 | -1.0945 | 1.1135 | 0.46 | 0.56 |
| RGD1565927_predicted | <a href="#">1376937_at</a>   | -1.2989 | -1.1143 | 0.8579 | 0.46 | 0.09 |
| Mustn1               | <a href="#">1373032_at</a>   | -1.3025 | -1.1119 | 0.8537 | 0.46 | 0.09 |
| Ssfa2_predicted      | <a href="#">1380701_at</a>   | -1.0706 | -1.1898 | 1.1113 | 0.46 | 0.29 |
| Tmem35               | <a href="#">1393282_at</a>   | -1.2353 | -1.1766 | 0.9524 | 0.46 | 0.11 |
| Aoc3                 | <a href="#">1372615_at</a>   | -1.0696 | -1.0814 | 1.0110 | 0.46 | 0.29 |
| NA                   | <a href="#">1372807_at</a>   | -1.4198 | -1.1246 | 0.7920 | 0.46 | 0.06 |
| Cpa3                 | <a href="#">1371151_at</a>   | -1.1675 | -1.2122 | 1.0383 | 0.46 | 0.14 |
| LOC363060            | <a href="#">1395887_at</a>   | -1.2759 | -1.1898 | 0.9325 | 0.46 | 0.09 |
| Sdccag33_predicted   | <a href="#">1383573_at</a>   | -1.3575 | -1.1210 | 0.8258 | 0.46 | 0.07 |
| RGD1562983_predicted | <a href="#">1372684_at</a>   | -1.2353 | -1.0739 | 0.8694 | 0.46 | 0.11 |
| Asb2                 | <a href="#">1372280_at</a>   | -1.2976 | -1.1458 | 0.8830 | 0.46 | 0.09 |
| Ptgis                | <a href="#">1370012_at</a>   | -1.3005 | -1.0963 | 0.8430 | 0.46 | 0.09 |
| Slc30a1              | <a href="#">1369099_at</a>   | -1.3728 | -1.1226 | 0.8177 | 0.46 | 0.06 |
| NA                   | <a href="#">1397452_at</a>   | -1.2817 | -1.1291 | 0.8810 | 0.46 | 0.09 |
| Tmem14a_predicted    | <a href="#">1378745_at</a>   | -1.1507 | -1.2099 | 1.0515 | 0.46 | 0.16 |
| RGD735112            | <a href="#">1383360_at</a>   | -1.2908 | -1.1442 | 0.8864 | 0.46 | 0.09 |
| NA                   | <a href="#">1397678_at</a>   | -1.1891 | -1.1306 | 0.9508 | 0.47 | 0.14 |
| Rab15                | <a href="#">1373646_at</a>   | -1.2961 | -1.1442 | 0.8828 | 0.47 | 0.09 |
| Gsta3                | <a href="#">1367774_at</a>   | -1.0624 | -1.1275 | 1.0613 | 0.47 | 0.29 |
| NA                   | <a href="#">1377925_at</a>   | -1.1651 | -1.2411 | 1.0652 | 0.47 | 0.14 |
| NA                   | <a href="#">1396475_at</a>   | -1.1664 | -1.2192 | 1.0452 | 0.47 | 0.14 |
| Prss23               | <a href="#">1373152_at</a>   | -0.9950 | -1.0039 | 1.0089 | 0.47 | 0.43 |
| Hey2                 | <a href="#">1384515_at</a>   | -1.3608 | -1.1080 | 0.8142 | 0.47 | 0.07 |
| Glrp1_predicted      | <a href="#">1380912_at</a>   | -1.2334 | -1.1231 | 0.9106 | 0.47 | 0.11 |
| LOC683529            | <a href="#">1391139_at</a>   | -1.1447 | -1.1477 | 1.0026 | 0.47 | 0.16 |
| Plekhc1              | <a href="#">1384182_at</a>   | -1.0635 | -1.0700 | 1.0061 | 0.47 | 0.29 |
| RGD1563344_predicted | <a href="#">1384254_at</a>   | -1.1715 | -1.1814 | 1.0084 | 0.47 | 0.14 |
| LOC687536            | <a href="#">1383488_at</a>   | -1.1616 | -1.0795 | 0.9293 | 0.47 | 0.14 |
| NA                   | <a href="#">1373312_at</a>   | -1.1685 | -1.0447 | 0.8940 | 0.47 | 0.14 |
| NA                   | <a href="#">1375856_at</a>   | -1.1676 | -1.1634 | 0.9964 | 0.47 | 0.14 |
| RGD1564128_predicted | <a href="#">1385682_at</a>   | -0.9771 | -1.0777 | 1.1029 | 0.47 | 0.56 |
| Dhrs4                | <a href="#">1370814_at</a>   | -1.3614 | -1.1126 | 0.8173 | 0.47 | 0.07 |
| Adamtsl4             | <a href="#">1372426_at</a>   | -1.2052 | -1.0863 | 0.9014 | 0.47 | 0.14 |
| NA                   | <a href="#">1378623_at</a>   | -1.3789 | -1.1026 | 0.7996 | 0.47 | 0.06 |



|                      |                              |         |         |        |      |      |
|----------------------|------------------------------|---------|---------|--------|------|------|
| Myh11                | <a href="#">1380613_at</a>   | -1.2851 | -1.0806 | 0.8408 | 0.47 | 0.09 |
| Dkk4_predicted       | <a href="#">1385444_at</a>   | -1.0295 | -1.0659 | 1.0354 | 0.47 | 0.43 |
| Itga11_predicted     | <a href="#">1394824_at</a>   | -0.9881 | -1.0020 | 1.0140 | 0.47 | 0.43 |
| NA                   | <a href="#">1372318_at</a>   | -1.2615 | -1.0968 | 0.8695 | 0.47 | 0.11 |
| Rai14                | <a href="#">1384528_at</a>   | -1.2702 | -1.1364 | 0.8946 | 0.47 | 0.09 |
| RGD1564654_predicted | <a href="#">1380901_at</a>   | -1.1152 | -1.3269 | 1.1898 | 0.47 | 0.16 |
| NA                   | <a href="#">1393025_at</a>   | -1.3639 | -1.0842 | 0.7949 | 0.47 | 0.07 |
| NA                   | <a href="#">1385973_at</a>   | -1.2436 | -1.0725 | 0.8624 | 0.47 | 0.11 |
| Tnfrsf17_predicted   | <a href="#">1385710_at</a>   | -1.4681 | -1.0757 | 0.7327 | 0.47 | 0.05 |
| NA                   | <a href="#">1371969_at</a>   | -1.2980 | -1.0680 | 0.8228 | 0.47 | 0.09 |
| RGD1306327           | <a href="#">1373266_at</a>   | -1.0192 | -1.0841 | 1.0637 | 0.47 | 0.43 |
| Prss8                | <a href="#">1370379_at</a>   | -1.2562 | -1.1158 | 0.8882 | 0.47 | 0.11 |
| NA                   | <a href="#">1370053_at</a>   | -1.1226 | -1.0197 | 0.9083 | 0.47 | 0.16 |
| Tmem43               | <a href="#">1373595_at</a>   | -1.3080 | -1.0929 | 0.8355 | 0.47 | 0.09 |
| Cyp2t1               | <a href="#">1368265_at</a>   | -1.2248 | -1.1261 | 0.9194 | 0.48 | 0.11 |
| NA                   | <a href="#">1395810_at</a>   | -1.1242 | -1.2455 | 1.1079 | 0.48 | 0.16 |
| Slc30a4              | <a href="#">1370357_at</a>   | -1.2218 | -1.0548 | 0.8633 | 0.48 | 0.11 |
| Cbara1               | <a href="#">1376715_at</a>   | -1.4263 | -1.0748 | 0.7536 | 0.48 | 0.06 |
| Kcnmb1               | <a href="#">1369767_a_at</a> | -1.2196 | -1.0816 | 0.8869 | 0.48 | 0.11 |
| NA                   | <a href="#">1388866_at</a>   | -1.0505 | -1.0684 | 1.0171 | 0.48 | 0.29 |
| Sntg2_predicted      | <a href="#">1385325_at</a>   | -1.0407 | -0.9870 | 0.9484 | 0.48 | 0.29 |
| Pacsin2              | <a href="#">1368068_a_at</a> | -1.3751 | -1.0769 | 0.7832 | 0.48 | 0.06 |
| Prdm15_predicted     | <a href="#">1390165_at</a>   | -1.2250 | -1.1103 | 0.9064 | 0.48 | 0.11 |
| Ide                  | <a href="#">1369626_at</a>   | -1.2972 | -1.0977 | 0.8462 | 0.48 | 0.09 |
| NA                   | <a href="#">1381145_at</a>   | -1.2849 | -1.0940 | 0.8515 | 0.48 | 0.09 |
| Mcpt8                | <a href="#">1368501_s_at</a> | -1.0257 | -1.2554 | 1.2239 | 0.48 | 0.43 |
| RGD1560011_predicted | <a href="#">1372403_at</a>   | -1.1365 | -1.1164 | 0.9823 | 0.48 | 0.16 |
| NA                   | <a href="#">1371099_at</a>   | -1.2773 | -1.0934 | 0.8560 | 0.48 | 0.09 |
| NA                   | <a href="#">1393210_at</a>   | -0.8486 | -0.9732 | 1.1468 | 0.48 | 0.88 |
| Cacna1h              | <a href="#">1368398_at</a>   | -1.1283 | -1.0726 | 0.9506 | 0.48 | 0.16 |
| Cldn10_predicted     | <a href="#">1372492_at</a>   | -1.0342 | -1.5814 | 1.5291 | 0.48 | 0.43 |
| RGD1307160_predicted | <a href="#">1374305_at</a>   | -1.3884 | -1.0670 | 0.7685 | 0.48 | 0.06 |
| Tns                  | <a href="#">1371361_at</a>   | -1.1045 | -1.0095 | 0.9140 | 0.48 | 0.16 |
| NA                   | <a href="#">1383102_at</a>   | -1.3342 | -1.0638 | 0.7973 | 0.48 | 0.07 |
| Cyp2c                | <a href="#">1387328_at</a>   | -1.0881 | -1.2180 | 1.1194 | 0.48 | 0.29 |
| NA                   | <a href="#">1392893_a_at</a> | -1.2346 | -1.0828 | 0.8770 | 0.48 | 0.11 |
| Fhl1                 | <a href="#">1372107_at</a>   | -1.1012 | -1.0207 | 0.9269 | 0.48 | 0.16 |
| NA                   | <a href="#">1397944_at</a>   | -1.3075 | -1.0530 | 0.8053 | 0.48 | 0.09 |
| NA                   | <a href="#">1382278_at</a>   | -0.9783 | -1.1312 | 1.1563 | 0.48 | 0.56 |
| Acadvl               | <a href="#">1367897_at</a>   | -1.2320 | -1.0780 | 0.8750 | 0.48 | 0.11 |
| Synpr                | <a href="#">1368865_at</a>   | -1.0400 | -0.9837 | 0.9458 | 0.48 | 0.29 |
| Nrep                 | <a href="#">1371412_a_at</a> | -1.0565 | -1.0674 | 1.0103 | 0.48 | 0.29 |
| RGD1560155_predicted | <a href="#">1377884_at</a>   | -1.2646 | -1.0577 | 0.8364 | 0.48 | 0.11 |
| Arhgap23_predicted   | <a href="#">1372307_at</a>   | -1.2706 | -1.0722 | 0.8438 | 0.48 | 0.09 |
| Adrb3                | <a href="#">1368780_at</a>   | -1.4217 | -1.0467 | 0.7363 | 0.48 | 0.06 |
| Atp1b1               | <a href="#">1367814_at</a>   | -1.0624 | -1.4247 | 1.3410 | 0.48 | 0.29 |
| Cln8                 | <a href="#">1389791_at</a>   | -1.1676 | -1.1584 | 0.9922 | 0.48 | 0.14 |
| RGD1359452           | <a href="#">1367648_at</a>   | -1.3934 | -1.0503 | 0.7538 | 0.48 | 0.06 |
| NA                   | <a href="#">1371775_at</a>   | -1.0683 | -1.0397 | 0.9733 | 0.48 | 0.29 |
| LOC654482            | <a href="#">1390927_at</a>   | -1.1388 | -1.0503 | 0.9222 | 0.48 | 0.16 |
| Cntrob_predicted     | <a href="#">1383020_at</a>   | -1.2261 | -1.0553 | 0.8606 | 0.49 | 0.11 |
| RGD1564074_predicted | <a href="#">1388916_at</a>   | -1.1248 | -1.0592 | 0.9417 | 0.49 | 0.16 |
| NA                   | <a href="#">1373158_at</a>   | -1.1745 | -1.0378 | 0.8836 | 0.49 | 0.14 |
| NA                   | <a href="#">1389281_at</a>   | -1.1770 | -1.0290 | 0.8742 | 0.49 | 0.14 |
| Sh3gl1               | <a href="#">1395680_at</a>   | -1.1179 | -1.0215 | 0.9137 | 0.49 | 0.16 |

|                      |                              |         |         |        |      |      |
|----------------------|------------------------------|---------|---------|--------|------|------|
| Otub2_predicted      | <a href="#">1385154_at</a>   | -1.0917 | -1.1151 | 1.0214 | 0.49 | 0.29 |
| RGD1564938_predicted | <a href="#">1371877_at</a>   | -1.1492 | -1.1430 | 0.9947 | 0.49 | 0.16 |
| RGD1560731_predicted | <a href="#">1382266_at</a>   | -1.2403 | -1.0234 | 0.8252 | 0.49 | 0.11 |
| NA                   | <a href="#">1383565_at</a>   | -1.1209 | -1.2048 | 1.0748 | 0.49 | 0.16 |
| LOC502020            | <a href="#">1394637_at</a>   | -1.2547 | -1.0790 | 0.8599 | 0.49 | 0.11 |
| NA                   | <a href="#">1377376_at</a>   | -1.0133 | -1.0089 | 0.9956 | 0.49 | 0.43 |
| Umps                 | <a href="#">1382257_at</a>   | -1.1008 | -1.0013 | 0.9097 | 0.49 | 0.16 |
| NA                   | <a href="#">1383061_at</a>   | -1.1251 | -1.1584 | 1.0296 | 0.49 | 0.16 |
| NA                   | <a href="#">1398977_at</a>   | -1.1997 | -1.0995 | 0.9165 | 0.49 | 0.14 |
| LOC363060            | <a href="#">1397729_x_at</a> | -1.2171 | -1.0921 | 0.8973 | 0.49 | 0.11 |
| Atp1b1               | <a href="#">1386937_at</a>   | -1.0665 | -1.3738 | 1.2881 | 0.49 | 0.29 |
| NA                   | <a href="#">1374290_at</a>   | -1.1341 | -0.9928 | 0.8754 | 0.49 | 0.16 |
| Gpha2                | <a href="#">1387044_at</a>   | -1.0908 | -1.0937 | 1.0026 | 0.49 | 0.29 |
| LOC686714            | <a href="#">1372922_at</a>   | -0.9294 | -0.9532 | 1.0255 | 0.49 | 0.70 |
| NA                   | <a href="#">1392840_at</a>   | -1.1608 | -1.0456 | 0.9008 | 0.49 | 0.16 |
| Ivd                  | <a href="#">1370232_at</a>   | -1.2909 | -1.0370 | 0.8033 | 0.49 | 0.09 |
| Osbp1a               | <a href="#">1390923_a_at</a> | -1.1384 | -1.1346 | 0.9967 | 0.49 | 0.16 |
| NA                   | <a href="#">1397340_at</a>   | -1.1819 | -1.0753 | 0.9098 | 0.49 | 0.14 |
| Mfap3l               | <a href="#">1398185_at</a>   | -1.2140 | -1.0591 | 0.8724 | 0.49 | 0.14 |
| Otub2_predicted      | <a href="#">1376118_at</a>   | -1.0644 | -1.1422 | 1.0731 | 0.49 | 0.29 |
| NA                   | <a href="#">1374089_at</a>   | -1.2741 | -1.0199 | 0.8005 | 0.49 | 0.09 |
| Osbp1a               | <a href="#">1378263_at</a>   | -1.1417 | -1.1298 | 0.9895 | 0.49 | 0.16 |
| NA                   | <a href="#">1378467_at</a>   | -1.1647 | -1.1238 | 0.9649 | 0.49 | 0.14 |
| Tpm1                 | <a href="#">1391841_at</a>   | -1.1809 | -1.0099 | 0.8552 | 0.49 | 0.14 |
| Pacsin2              | <a href="#">1372857_at</a>   | -1.2508 | -1.0488 | 0.8385 | 0.49 | 0.11 |
| Cobll1_predicted     | <a href="#">1376868_at</a>   | -1.1367 | -1.1094 | 0.9760 | 0.49 | 0.16 |
| NA                   | <a href="#">1381215_at</a>   | -1.1909 | -1.0002 | 0.8399 | 0.49 | 0.14 |
| Slc25a25             | <a href="#">1371754_at</a>   | -1.1469 | -1.0685 | 0.9316 | 0.49 | 0.16 |
| Tgfb2                | <a href="#">1376425_at</a>   | -0.9899 | -0.9562 | 0.9659 | 0.49 | 0.43 |
| Elovl6               | <a href="#">1394401_at</a>   | -1.1933 | -1.0179 | 0.8530 | 0.49 | 0.14 |
| NA                   | <a href="#">1389592_at</a>   | -1.2731 | -1.0186 | 0.8001 | 0.49 | 0.09 |
| Pir                  | <a href="#">1377662_at</a>   | -1.1893 | -1.0624 | 0.8933 | 0.49 | 0.14 |
| NA                   | <a href="#">1376149_at</a>   | -1.3152 | -1.0261 | 0.7802 | 0.49 | 0.09 |
| NA                   | <a href="#">1389511_s_at</a> | -1.1714 | -1.0175 | 0.8686 | 0.49 | 0.14 |
| NA                   | <a href="#">1386552_at</a>   | -1.1302 | -0.9905 | 0.8763 | 0.49 | 0.16 |
| Cte1                 | <a href="#">1388211_s_at</a> | -1.1377 | -1.0280 | 0.9036 | 0.49 | 0.16 |
| NA                   | <a href="#">1378156_at</a>   | -1.1462 | -1.0358 | 0.9037 | 0.49 | 0.16 |
| Adamts8_predicted    | <a href="#">1379022_at</a>   | -1.3006 | -1.0123 | 0.7783 | 0.49 | 0.09 |
| Tpm1                 | <a href="#">1395794_at</a>   | -1.1810 | -0.9881 | 0.8367 | 0.49 | 0.14 |
| RGD1562511_predicted | <a href="#">1371635_at</a>   | -1.2516 | -1.0010 | 0.7998 | 0.50 | 0.11 |
| RGD1307524_predicted | <a href="#">1389007_at</a>   | -1.3551 | -1.0107 | 0.7459 | 0.50 | 0.07 |
| NA                   | <a href="#">1391370_at</a>   | -1.2130 | -1.0292 | 0.8485 | 0.50 | 0.14 |
| Sparcl1              | <a href="#">1386865_at</a>   | -1.0977 | -1.0049 | 0.9154 | 0.50 | 0.16 |
| Aim1l_predicted      | <a href="#">1379226_at</a>   | -1.1962 | -1.0475 | 0.8756 | 0.50 | 0.14 |
| Msln                 | <a href="#">1368441_at</a>   | -1.1830 | -1.0228 | 0.8646 | 0.50 | 0.14 |
| Hsph1                | <a href="#">1385620_at</a>   | -1.1499 | -1.0326 | 0.8980 | 0.50 | 0.16 |
| NA                   | <a href="#">1386022_at</a>   | -1.0470 | -1.0239 | 0.9779 | 0.50 | 0.29 |
| Hoxc8                | <a href="#">1380442_at</a>   | -1.0441 | -1.0010 | 0.9588 | 0.50 | 0.29 |
| Ppp1r3c              | <a href="#">1373108_at</a>   | -1.0509 | -0.9990 | 0.9506 | 0.50 | 0.29 |
| NA                   | <a href="#">1388662_at</a>   | -1.1253 | -1.0706 | 0.9514 | 0.50 | 0.16 |
| Lzts2                | <a href="#">1389190_at</a>   | -1.3204 | -0.9969 | 0.7550 | 0.50 | 0.07 |
| NA                   | <a href="#">1389649_at</a>   | -1.0749 | -0.9863 | 0.9175 | 0.50 | 0.29 |
| RGD1564833_predicted | <a href="#">1393264_at</a>   | -1.1514 | -0.9830 | 0.8538 | 0.50 | 0.16 |
| Pgbd5_predicted      | <a href="#">1389597_at</a>   | -0.9513 | -0.9331 | 0.9808 | 0.50 | 0.56 |
| Slit3                | <a href="#">1391375_at</a>   | -1.1001 | -1.0025 | 0.9113 | 0.50 | 0.16 |

|                      |                              |         |         |        |      |      |
|----------------------|------------------------------|---------|---------|--------|------|------|
| Spsb1_predicted      | <a href="#">1373554_at</a>   | -1.1540 | -0.9789 | 0.8483 | 0.50 | 0.16 |
| NA                   | <a href="#">1375990_a_at</a> | -1.2958 | -0.9988 | 0.7708 | 0.50 | 0.09 |
| Igfbp5               | <a href="#">1370960_at</a>   | -0.9145 | -0.9136 | 0.9990 | 0.50 | 0.70 |
| RGD1561962_predicted | <a href="#">1376290_at</a>   | -1.2358 | -0.9985 | 0.8080 | 0.50 | 0.11 |
| Akr7a3               | <a href="#">1368121_at</a>   | -1.1054 | -1.0457 | 0.9459 | 0.50 | 0.16 |
| Hsph1                | <a href="#">1388898_at</a>   | -1.1579 | -0.9932 | 0.8578 | 0.50 | 0.16 |
| Cyp1b1               | <a href="#">1368990_at</a>   | -0.9269 | -1.4013 | 1.5118 | 0.50 | 0.70 |
| NA                   | <a href="#">1378146_at</a>   | -1.1333 | -0.9866 | 0.8706 | 0.50 | 0.16 |
| NA                   | <a href="#">1383750_at</a>   | -1.1084 | -0.9769 | 0.8813 | 0.50 | 0.16 |
| NA                   | <a href="#">1390675_at</a>   | -1.2046 | -0.9888 | 0.8208 | 0.50 | 0.14 |
| NA                   | <a href="#">1395203_at</a>   | -1.1676 | -0.9777 | 0.8374 | 0.50 | 0.14 |
| Tas1r2               | <a href="#">1372379_at</a>   | -0.8849 | -0.8941 | 1.0104 | 0.50 | 0.88 |
| NA                   | <a href="#">1372537_at</a>   | -1.0776 | -0.9575 | 0.8885 | 0.50 | 0.29 |
| NA                   | <a href="#">1374971_at</a>   | -1.1254 | -1.0155 | 0.9023 | 0.50 | 0.16 |
| LOC360570            | <a href="#">1382805_at</a>   | -1.1187 | -1.0044 | 0.8978 | 0.50 | 0.16 |
| LOC686661            | <a href="#">1394550_at</a>   | -1.1710 | -0.9973 | 0.8516 | 0.50 | 0.14 |
| Nrd1                 | <a href="#">1382673_at</a>   | -1.1096 | -0.9932 | 0.8950 | 0.50 | 0.16 |
| Expi                 | <a href="#">1387715_at</a>   | -0.7084 | -0.8424 | 1.1892 | 0.50 | 1.53 |
| Ppp2r3a              | <a href="#">1395410_at</a>   | -1.2559 | -0.9826 | 0.7824 | 0.50 | 0.11 |
| NA                   | <a href="#">1381080_at</a>   | -1.1678 | -0.9870 | 0.8452 | 0.50 | 0.14 |

**Dataset 1b** Expression profile of dysplastic ZD vs ZS esophagus at 5 wks post first NMBA dose (cutoff point: q-value < 5% and ≥ 2-fold difference)

Inflammatory probe sets denoted in Table 1 are highlighted in yellow.

| 689 Up-regulated probe sets associated with ZD | Affymetrix Probe ID* | Numerator Score(d) | Denominator (r) | Fold-Change** | q-value(%) |      |
|------------------------------------------------|----------------------|--------------------|-----------------|---------------|------------|------|
| Ca2                                            | 1367733_at           | 8.2500             | 5.5079          | 0.6676        | 41.29      | 0.00 |
| Ca2                                            | 1386922_at           | 11.1192            | 5.1365          | 0.4620        | 35.56      | 0.00 |
| Cxcl5                                          | 1387648_at           | 4.0499             | 4.3000          | 1.0618        | 28.07      | 0.00 |
| Ptgs2 (Cox-2)                                  | 1368527_at           | 3.8796             | 4.0811          | 1.0519        | 26.26      | 0.00 |
| Cxcl2                                          | 1368760_at           | 6.3202             | 4.5370          | 0.7179        | 25.52      | 0.00 |
| NA                                             | 1379497_at           | 5.5425             | 4.7193          | 0.8515        | 22.71      | 0.00 |
| NA                                             | 1392736_at           | 5.5500             | 4.6666          | 0.8408        | 21.19      | 0.00 |
| Krtap14_predicted                              | 1379709_at           | 1.5920             | 2.5247          | 1.5859        | 18.61      | 0.06 |
| Igha_mapped                                    | 1374334_at           | 3.7885             | 3.8677          | 1.0209        | 16.78      | 0.00 |
| CiCa2                                          | 1384784_at           | 2.5173             | 3.1769          | 1.2620        | 15.76      | 0.03 |
| Ceacam1                                        | 1382975_at           | 4.2969             | 3.6358          | 0.8461        | 15.39      | 0.00 |
| Ceacam1                                        | 1374620_at           | 5.6075             | 3.7590          | 0.6704        | 15.11      | 0.00 |
| NA                                             | 1391505_x_at         | 4.9495             | 3.8776          | 0.7834        | 14.51      | 0.00 |
| LOC683295                                      | 1373349_at           | 3.7618             | 4.6910          | 1.2470        | 13.72      | 0.00 |
| Acvr1                                          | 1394503_at           | 3.1779             | 3.1897          | 1.0037        | 12.61      | 0.00 |
| NA                                             | 1374236_at           | 7.9726             | 3.7009          | 0.4642        | 12.53      | 0.00 |
| Fibp                                           | 1385107_at           | 4.3432             | 4.0505          | 0.9326        | 12.14      | 0.00 |
| Ka17                                           | 1397645_at           | 4.6693             | 3.5406          | 0.7583        | 10.93      | 0.00 |
| Ly6b                                           | 1370401_at           | 4.0061             | 3.1080          | 0.7758        | 10.81      | 0.00 |
| NA                                             | 1373536_at           | 5.3465             | 3.5854          | 0.6706        | 10.71      | 0.00 |
| NA                                             | 1375422_at           | 6.2085             | 3.3629          | 0.5417        | 10.62      | 0.00 |
| RGD1560676_predicted                           | 1393978_at           | 5.0627             | 3.3659          | 0.6648        | 9.54       | 0.00 |
| Ear11                                          | 1370777_at           | 7.4168             | 3.1999          | 0.4314        | 9.31       | 0.00 |
| Il22ra2                                        | 1391612_at           | 6.6945             | 3.1661          | 0.4729        | 9.24       | 0.00 |
| NA                                             | 1397900_at           | 4.8137             | 3.0850          | 0.6409        | 9.11       | 0.00 |
| LOC690164                                      | 1384329_at           | 5.6218             | 3.2339          | 0.5752        | 8.98       | 0.00 |
| LOC684841                                      | 1380888_at           | 4.5448             | 2.9631          | 0.6520        | 8.78       | 0.00 |

|                      |              |        |        |        |      |      |
|----------------------|--------------|--------|--------|--------|------|------|
| Anxa1                | 1394451_at   | 5.1024 | 3.0474 | 0.5972 | 8.62 | 0.00 |
| RT1-CE5              | 1388255_x_at | 1.0880 | 1.7958 | 1.6506 | 8.28 | 0.20 |
| Ceacam1              | 1369854_a_at | 3.3063 | 2.5925 | 0.7841 | 7.82 | 0.00 |
| LOC500180            | 1387902_a_at | 2.8631 | 2.7536 | 0.9618 | 7.57 | 0.01 |
| Ifit3                | 1376908_at   | 3.0654 | 2.6095 | 0.8513 | 7.54 | 0.00 |
| Fos                  | 1375043_at   | 4.6972 | 2.8422 | 0.6051 | 7.00 | 0.00 |
| NA                   | 1382173_at   | 4.0358 | 2.6120 | 0.6472 | 6.69 | 0.00 |
| Cfi                  | 1368205_at   | 4.5296 | 2.8392 | 0.6268 | 6.69 | 0.00 |
| NA                   | 1381127_at   | 3.5343 | 2.6017 | 0.7361 | 6.66 | 0.00 |
| Sectm1b              | 1376976_at   | 4.2321 | 2.6937 | 0.6365 | 6.57 | 0.00 |
| Fosl1                | 1368489_at   | 5.2811 | 2.6126 | 0.4947 | 6.39 | 0.00 |
| LOC683295            | 1371757_s_at | 2.9389 | 3.4956 | 1.1894 | 6.37 | 0.01 |
| Plat                 | 1367800_at   | 6.0762 | 2.6342 | 0.4335 | 6.36 | 0.00 |
| Il1b                 | 1398256_at   | 4.1734 | 2.6451 | 0.6338 | 6.33 | 0.00 |
| NA                   | 1383163_at   | 2.8594 | 2.3420 | 0.8191 | 6.27 | 0.01 |
| RGD1561543_predicted | 1396194_at   | 3.6062 | 2.4367 | 0.6757 | 6.07 | 0.00 |
| Ppp2r4_predicted     | 1395409_at   | 5.4725 | 2.6559 | 0.4853 | 6.07 | 0.00 |
| U2af2                | 1395614_at   | 5.4605 | 2.5566 | 0.4682 | 6.02 | 0.00 |
| LOC685912            | 1385686_at   | 4.9335 | 2.6104 | 0.5291 | 5.97 | 0.00 |
| RGD1560851_predicted | 1373902_at   | 5.5666 | 2.5160 | 0.4520 | 5.91 | 0.00 |
| Sifn3                | 1387134_at   | 4.2114 | 2.4737 | 0.5874 | 5.82 | 0.00 |
| Rbclca2              | 1385784_at   | 1.9714 | 1.9748 | 1.0017 | 5.79 | 0.04 |
| LOC685652            | 1377246_at   | 2.3322 | 2.1260 | 0.9116 | 5.75 | 0.04 |
| Cxcl14               | 1388485_at   | 5.8768 | 2.4144 | 0.4108 | 5.45 | 0.00 |
| Dusp1                | 1368147_at   | 3.1112 | 2.2841 | 0.7341 | 5.38 | 0.00 |
| NA                   | 1386128_at   | 1.5274 | 1.6866 | 1.1043 | 5.34 | 0.07 |
| NA                   | 1383469_at   | 3.4103 | 2.2350 | 0.6554 | 5.29 | 0.00 |
| Areg                 | 1369871_at   | 4.9467 | 2.4534 | 0.4960 | 5.28 | 0.00 |
| Zfp655               | 1376840_at   | 3.9364 | 2.2745 | 0.5778 | 5.25 | 0.00 |
| LOC691783            | 1376710_at   | 6.3499 | 2.3621 | 0.3720 | 5.19 | 0.00 |
| Slc5a5               | 1369020_at   | 4.3875 | 2.2989 | 0.5240 | 5.14 | 0.00 |
| Apobec1              | 1368270_at   | 3.9114 | 2.2397 | 0.5726 | 5.07 | 0.00 |
| Adfp                 | 1390383_at   | 3.2099 | 2.1334 | 0.6646 | 5.03 | 0.00 |
| RGD1561144_predicted | 1394264_at   | 5.0136 | 2.2790 | 0.4546 | 4.97 | 0.00 |
| Tmprss11d            | 1387620_a_at | 4.7456 | 2.3883 | 0.5033 | 4.96 | 0.00 |
| Cast                 | 1391481_at   | 3.0048 | 2.2109 | 0.7358 | 4.95 | 0.00 |
| NA                   | 1376685_at   | 4.0526 | 2.4100 | 0.5947 | 4.95 | 0.00 |
| Rhoc_predicted       | 1378930_a_at | 5.9531 | 2.2720 | 0.3816 | 4.93 | 0.00 |
| Elf3                 | 1374119_at   | 4.2495 | 2.3389 | 0.5504 | 4.92 | 0.00 |
| Ddit4                | 1368025_at   | 5.4350 | 2.2499 | 0.4140 | 4.84 | 0.00 |
| Lcn2                 | 1387011_at   | 2.8491 | 2.3945 | 0.8405 | 4.79 | 0.01 |
| NA                   | 1380520_at   | 4.2580 | 2.3516 | 0.5523 | 4.67 | 0.00 |
| NA                   | 1377705_at   | 4.4165 | 2.1339 | 0.4832 | 4.61 | 0.00 |
| Cxcr4                | 1370097_a_at | 4.5365 | 2.2020 | 0.4854 | 4.58 | 0.00 |
| Scgb1a1              | 1367566_at   | 4.8053 | 2.2055 | 0.4590 | 4.57 | 0.00 |
| Rnd1                 | 1381533_at   | 4.0917 | 2.1735 | 0.5312 | 4.56 | 0.00 |
| NA                   | 1381335_at   | 3.5824 | 2.3272 | 0.6496 | 4.53 | 0.00 |
| Csf3r_predicted      | 1386009_at   | 2.0223 | 1.8941 | 0.9366 | 4.49 | 0.04 |
| MGC105830            | 1393669_at   | 3.1668 | 2.4756 | 0.7817 | 4.45 | 0.00 |
| LOC685479            | 1389773_at   | 3.1193 | 2.3665 | 0.7587 | 4.44 | 0.00 |
| NA                   | 1389678_at   | 3.5426 | 2.3153 | 0.6536 | 4.38 | 0.00 |
| RGD1564982_predicted | 1381913_at   | 3.5010 | 2.1314 | 0.6088 | 4.37 | 0.00 |
| RGD1311126_predicted | 1376668_at   | 4.9095 | 2.0696 | 0.4215 | 4.32 | 0.00 |
| Ly6c                 | 1370056_at   | 3.3719 | 2.0098 | 0.5961 | 4.31 | 0.00 |
| NA                   | 1377706_x_at | 3.7141 | 2.0118 | 0.5416 | 4.27 | 0.00 |

|                      |              |        |        |        |      |      |
|----------------------|--------------|--------|--------|--------|------|------|
| Lyn                  | 1368679_a_at | 3.1741 | 1.9675 | 0.6199 | 4.22 | 0.00 |
| LOC246266            | 1387959_at   | 4.8566 | 2.0280 | 0.4176 | 4.20 | 0.00 |
| LOC688030            | 1378024_at   | 2.9386 | 2.1536 | 0.7329 | 4.19 | 0.01 |
| NA                   | 1390890_at   | 4.6913 | 2.0619 | 0.4395 | 4.18 | 0.00 |
| RGD1561144_predicted | 1392444_at   | 3.8982 | 2.0116 | 0.5160 | 4.18 | 0.00 |
| Cxcr4                | 1373661_a_at | 5.0333 | 2.0847 | 0.4142 | 4.16 | 0.00 |
| Tubb3                | 1371618_s_at | 1.5855 | 1.6095 | 1.0151 | 4.16 | 0.06 |
| Mogat1_predicted     | 1385308_at   | 2.6902 | 1.8453 | 0.6859 | 4.11 | 0.02 |
| Rrm2                 | 1393848_at   | 3.3291 | 1.9484 | 0.5852 | 4.09 | 0.00 |
| LOC680531            | 1383581_at   | 3.1065 | 1.9683 | 0.6336 | 4.09 | 0.00 |
| NA                   | 1389754_at   | 2.5194 | 1.8007 | 0.7147 | 4.06 | 0.03 |
| Kif23_predicted      | 1395828_at   | 3.1745 | 1.8838 | 0.5934 | 3.99 | 0.00 |
| Cftr                 | 1384960_at   | 3.6107 | 1.8868 | 0.5226 | 3.98 | 0.00 |
| NA                   | 1377774_at   | 1.3253 | 1.9751 | 1.4903 | 3.98 | 0.12 |
| Tnrc9_predicted      | 1376352_at   | 2.1211 | 1.6142 | 0.7610 | 3.97 | 0.04 |
| MGC105830            | 1385270_s_at | 2.7299 | 2.3673 | 0.8672 | 3.96 | 0.02 |
| Pttg1                | 1367780_at   | 3.8804 | 1.9133 | 0.4931 | 3.92 | 0.00 |
| Kcnj16               | 1373991_at   | 1.0088 | 1.2016 | 1.1912 | 3.92 | 0.30 |
| Klf12_predicted      | 1385545_at   | 2.9587 | 1.7902 | 0.6051 | 3.89 | 0.01 |
| Ube2c_predicted      | 1388484_at   | 3.4708 | 1.9614 | 0.5651 | 3.89 | 0.00 |
| Alpl                 | 1368139_s_at | 4.4682 | 1.9784 | 0.4428 | 3.87 | 0.00 |
| Cxcr4                | 1389244_x_at | 4.4088 | 1.9815 | 0.4494 | 3.87 | 0.00 |
| Padi4                | 1387239_a_at | 2.3701 | 1.6491 | 0.6958 | 3.86 | 0.04 |
| Adfp                 | 1390850_at   | 2.4653 | 1.7072 | 0.6925 | 3.84 | 0.04 |
| Atf3                 | 1369268_at   | 2.8729 | 1.7859 | 0.6216 | 3.82 | 0.01 |
| Birc3                | 1370113_at   | 3.5963 | 1.8837 | 0.5238 | 3.82 | 0.00 |
| NA                   | 1375230_at   | 2.6852 | 1.7488 | 0.6513 | 3.80 | 0.02 |
| Cd3e_predicted       | 1389997_at   | 4.2300 | 1.8867 | 0.4460 | 3.73 | 0.00 |
| Cdkn1a               | 1387391_at   | 2.8994 | 1.7929 | 0.6184 | 3.72 | 0.01 |
| Depdc1b_predicted    | 1390892_at   | 3.7506 | 1.8607 | 0.4961 | 3.70 | 0.00 |
| Mx1                  | 1371015_at   | 1.7871 | 1.5307 | 0.8565 | 3.70 | 0.05 |
| Ccl6                 | 1382106_at   | 2.8067 | 1.7354 | 0.6183 | 3.68 | 0.02 |
| NA                   | 1395388_at   | 2.3521 | 1.6245 | 0.6907 | 3.67 | 0.04 |
| Mcpt9                | 1387220_at   | 2.8365 | 1.7107 | 0.6031 | 3.66 | 0.02 |
| LOC683586            | 1390771_at   | 3.5345 | 1.8701 | 0.5291 | 3.63 | 0.00 |
| Paics                | 1393751_at   | 3.2407 | 1.7506 | 0.5402 | 3.63 | 0.00 |
| Birc5                | 1368799_at   | 3.9067 | 1.8322 | 0.4690 | 3.62 | 0.00 |
| Tk1                  | 1389858_at   | 3.5354 | 1.8753 | 0.5304 | 3.60 | 0.00 |
| Slc16a1              | 1389223_at   | 4.7296 | 1.8419 | 0.3894 | 3.60 | 0.00 |
| Ccnb1                | 1370346_at   | 3.0727 | 1.7804 | 0.5794 | 3.59 | 0.00 |
| NA                   | 1378261_at   | 4.0437 | 1.8547 | 0.4587 | 3.58 | 0.00 |
| Iqgap1_predicted     | 1378028_at   | 3.2334 | 1.7656 | 0.5460 | 3.58 | 0.00 |
| RGD1559597_predicted | 1384627_at   | 0.9055 | 0.9978 | 1.1019 | 3.57 | 0.43 |
| Cndp1                | 1390569_at   | 3.3835 | 1.7324 | 0.5120 | 3.56 | 0.00 |
| Cd7_predicted        | 1392082_a_at | 5.0497 | 1.8149 | 0.3594 | 3.54 | 0.00 |
| Ccnb1                | 1370345_at   | 3.3601 | 1.8302 | 0.5447 | 3.53 | 0.00 |
| Gp49b                | 1375917_at   | 2.4755 | 2.0727 | 0.8373 | 3.52 | 0.04 |
| RGD1560812_predicted | 1383874_at   | 3.9011 | 1.7653 | 0.4525 | 3.51 | 0.00 |
| Asns                 | 1387925_at   | 3.6326 | 1.7797 | 0.4899 | 3.50 | 0.00 |
| Sult1b1              | 1387314_at   | 3.3044 | 1.7521 | 0.5302 | 3.48 | 0.00 |
| Stk6                 | 1376039_at   | 3.4477 | 1.7624 | 0.5112 | 3.47 | 0.00 |
| Serpinb3             | 1384973_at   | 1.7171 | 2.5611 | 1.4915 | 3.45 | 0.05 |
| Plaur                | 1387269_s_at | 3.6328 | 1.7288 | 0.4759 | 3.44 | 0.00 |
| Cd3e_predicted       | 1379791_at   | 4.2060 | 1.7835 | 0.4240 | 3.43 | 0.00 |
| C3                   | 1368000_at   | 2.6611 | 2.1131 | 0.7941 | 3.43 | 0.02 |

|                      |              |        |        |        |      |      |
|----------------------|--------------|--------|--------|--------|------|------|
| Mat2a                | 1387737_at   | 3.3075 | 1.6984 | 0.5135 | 3.39 | 0.00 |
| LOC687121            | 1384231_at   | 2.8444 | 1.7494 | 0.6150 | 3.38 | 0.01 |
| NA                   | 1396362_at   | 2.8161 | 1.6173 | 0.5743 | 3.37 | 0.02 |
| Cdca2                | 1381833_at   | 2.8369 | 1.6483 | 0.5810 | 3.37 | 0.02 |
| Krt2-5               | 1371756_at   | 2.3341 | 2.2732 | 0.9739 | 3.36 | 0.04 |
| Csf3                 | 1369529_at   | 1.4677 | 1.3633 | 0.9289 | 3.36 | 0.07 |
| Pou3f1               | 1370432_at   | 2.5811 | 1.5856 | 0.6143 | 3.35 | 0.03 |
| Scgb1c1_predicted    | 1393436_at   | 3.0155 | 1.6262 | 0.5393 | 3.35 | 0.00 |
| Rod1                 | 1387432_at   | 3.3469 | 1.7360 | 0.5187 | 3.35 | 0.00 |
| Mad2l1_predicted     | 1398602_at   | 3.1426 | 1.6875 | 0.5370 | 3.35 | 0.00 |
| Hist3h2ba_predicted  | 1392512_at   | 3.5837 | 1.6638 | 0.4643 | 3.32 | 0.00 |
| NA                   | 1370988_at   | 2.1957 | 2.0212 | 0.9205 | 3.31 | 0.04 |
| RGD1305719_predicted | 1380107_a_at | 3.1117 | 1.6211 | 0.5210 | 3.30 | 0.00 |
| Emb                  | 1368541_at   | 4.3912 | 1.7160 | 0.3908 | 3.30 | 0.00 |
| Pls1_predicted       | 1389654_at   | 5.2180 | 1.7094 | 0.3276 | 3.30 | 0.00 |
| NA                   | 1373759_at   | 2.5000 | 1.5249 | 0.6100 | 3.30 | 0.03 |
| LOC500449            | 1382167_at   | 4.6880 | 1.7010 | 0.3628 | 3.30 | 0.00 |
| Pscd1                | 1369517_at   | 3.2636 | 1.8251 | 0.5592 | 3.28 | 0.00 |
| Myo1b                | 1369720_at   | 4.5142 | 1.6806 | 0.3723 | 3.27 | 0.00 |
| Ifitm1_predicted     | 1372013_at   | 4.5329 | 1.7111 | 0.3775 | 3.27 | 0.00 |
| Tmem58_predicted     | 1392285_at   | 2.7853 | 1.5725 | 0.5645 | 3.27 | 0.02 |
| Prp2                 | 1373006_at   | 4.7337 | 1.6752 | 0.3539 | 3.25 | 0.00 |
| Ldhd                 | 1382277_at   | 4.1599 | 1.6735 | 0.4023 | 3.24 | 0.00 |
| Slc35e1_predicted    | 1374449_at   | 3.3038 | 1.6713 | 0.5059 | 3.23 | 0.00 |
| CxCl3 (Gm1960)       | 1370633_at   | 2.7157 | 1.5532 | 0.5719 | 3.23 | 0.02 |
| NA                   | 1388773_at   | 2.8871 | 1.6367 | 0.5669 | 3.23 | 0.01 |
| Tcrb                 | 1388275_at   | 3.6249 | 1.6478 | 0.4546 | 3.22 | 0.00 |
| Palmd                | 1395734_at   | 5.4498 | 1.6812 | 0.3085 | 3.21 | 0.00 |
| Kcnj16               | 1370076_at   | 0.8943 | 1.0063 | 1.1253 | 3.20 | 0.43 |
| Nrg1                 | 1371211_a_at | 2.9924 | 1.6768 | 0.5603 | 3.20 | 0.00 |
| Atp1a1               | 1371108_a_at | 2.9376 | 1.8310 | 0.6233 | 3.20 | 0.01 |
| Sp110                | 1372930_at   | 2.6336 | 1.5226 | 0.5781 | 3.18 | 0.02 |
| Myo5a                | 1368450_at   | 5.7379 | 1.6788 | 0.2926 | 3.18 | 0.00 |
| Igha_mapped          | 1371262_at   | 2.1911 | 1.4707 | 0.6712 | 3.17 | 0.04 |
| NA                   | 1382291_at   | 2.0877 | 1.4261 | 0.6831 | 3.16 | 0.04 |
| Scd1                 | 1370355_at   | 2.8125 | 1.8557 | 0.6598 | 3.16 | 0.02 |
| Hist1h4b             | 1372726_at   | 5.5578 | 1.6529 | 0.2974 | 3.16 | 0.00 |
| RGD1310958_predicted | 1391058_at   | 4.7192 | 1.6444 | 0.3484 | 3.16 | 0.00 |
| Cdc20                | 1370294_a_at | 3.2238 | 1.6066 | 0.4984 | 3.14 | 0.00 |
| RGD1309350_predicted | 1377660_at   | 4.9870 | 1.6587 | 0.3326 | 3.14 | 0.00 |
| Cldn10_predicted     | 1370967_at   | 1.5836 | 1.7654 | 1.1148 | 3.13 | 0.06 |
| RGD1308324_predicted | 1391236_at   | 4.0792 | 1.6610 | 0.4072 | 3.12 | 0.00 |
| Dsc2                 | 1375936_at   | 2.7440 | 1.5124 | 0.5512 | 3.11 | 0.02 |
| NA                   | 1376394_at   | 3.5086 | 1.6134 | 0.4598 | 3.11 | 0.00 |
| Ccna2                | 1379582_a_at | 2.9805 | 1.6254 | 0.5454 | 3.10 | 0.00 |
| Ptprz1               | 1368350_at   | 3.7949 | 1.6215 | 0.4273 | 3.09 | 0.00 |
| Tiparp_predicted     | 1385407_at   | 5.3860 | 1.6232 | 0.3014 | 3.09 | 0.00 |
| Rgs1                 | 1398540_at   | 3.6259 | 1.6378 | 0.4517 | 3.07 | 0.00 |
| Ceacam1              | 1370371_a_at | 1.7562 | 2.4893 | 1.4174 | 3.07 | 0.05 |
| Hbegf                | 1368983_at   | 4.2799 | 1.6022 | 0.3744 | 3.07 | 0.00 |
| NA                   | 1392627_x_at | 2.5154 | 1.6845 | 0.6697 | 3.04 | 0.03 |
| LOC259246            | 1374912_at   | 3.2093 | 1.5858 | 0.4941 | 3.03 | 0.00 |
| Hmmr                 | 1370462_at   | 3.5879 | 1.5932 | 0.4440 | 3.03 | 0.00 |
| Mphosph1_predicted   | 1380775_at   | 2.9149 | 1.5462 | 0.5305 | 3.02 | 0.01 |
| Ccl6                 | 1389123_at   | 3.3431 | 1.5667 | 0.4686 | 3.02 | 0.00 |

|                      |              |        |        |        |      |      |
|----------------------|--------------|--------|--------|--------|------|------|
| Kif22                | 1372516_at   | 3.0434 | 1.5866 | 0.5213 | 3.02 | 0.00 |
| NA                   | 1391518_at   | 3.3006 | 1.6621 | 0.5036 | 3.02 | 0.00 |
| RGD1306792_predicted | 1391104_at   | 2.2544 | 1.7478 | 0.7753 | 3.02 | 0.04 |
| Rrm2                 | 1389408_at   | 2.8672 | 1.5424 | 0.5380 | 3.02 | 0.01 |
| Es2                  | 1371100_at   | 1.8392 | 1.3391 | 0.7281 | 3.01 | 0.05 |
| NA                   | 1389990_at   | 2.1831 | 1.7935 | 0.8215 | 3.01 | 0.04 |
| MGC105830            | 1382946_a_at | 2.8802 | 1.7464 | 0.6063 | 3.00 | 0.01 |
| Ccr6                 | 1393929_at   | 4.5145 | 1.5902 | 0.3522 | 3.00 | 0.00 |
| RGD1565606_predicted | 1372915_at   | 3.3811 | 1.5279 | 0.4519 | 2.98 | 0.00 |
| Top2a                | 1388650_at   | 2.8008 | 1.5543 | 0.5550 | 2.97 | 0.02 |
| Slc4a7               | 1369160_a_at | 4.0667 | 1.5369 | 0.3779 | 2.96 | 0.00 |
| Ttk_predicted        | 1379448_at   | 2.8686 | 1.5393 | 0.5366 | 2.96 | 0.01 |
| Cd3d                 | 1387472_at   | 3.4255 | 1.5069 | 0.4399 | 2.95 | 0.00 |
| Wbscr1               | 1397675_at   | 2.6020 | 1.7480 | 0.6718 | 2.95 | 0.02 |
| NA                   | 1377092_at   | 2.2185 | 1.8887 | 0.8513 | 2.95 | 0.04 |
| Junb                 | 1387788_at   | 3.5244 | 1.6027 | 0.4548 | 2.95 | 0.00 |
| Sox9                 | 1392813_at   | 2.5620 | 1.4392 | 0.5618 | 2.95 | 0.03 |
| LOC499745            | 1375277_at   | 2.9689 | 1.6164 | 0.5445 | 2.94 | 0.01 |
| Kif23_predicted      | 1391063_at   | 3.0034 | 1.4899 | 0.4961 | 2.94 | 0.00 |
| Tnnt2                | 1367592_at   | 2.6493 | 1.4884 | 0.5618 | 2.94 | 0.02 |
| Ccnb2                | 1389566_at   | 3.3964 | 1.5387 | 0.4530 | 2.94 | 0.00 |
| Kif20a_predicted     | 1373722_at   | 3.1005 | 1.5169 | 0.4892 | 2.93 | 0.00 |
| Snx10                | 1383585_s_at | 4.0647 | 1.5728 | 0.3869 | 2.93 | 0.00 |
| Socs1                | 1371252_at   | 3.1380 | 1.5752 | 0.5020 | 2.92 | 0.00 |
| Mt1a                 | 1371237_a_at | 3.4674 | 1.5270 | 0.4404 | 2.92 | 0.00 |
| Sod2                 | 1370172_at   | 3.3966 | 1.6139 | 0.4752 | 2.91 | 0.00 |
| LOC362350            | 1370924_at   | 4.2348 | 1.5358 | 0.3627 | 2.91 | 0.00 |
| Depdc1a_predicted    | 1376914_at   | 3.1520 | 1.5386 | 0.4881 | 2.90 | 0.00 |
| Hmmr                 | 1370461_at   | 2.6178 | 1.4870 | 0.5681 | 2.90 | 0.02 |
| Agpat2_predicted     | 1374570_at   | 3.5853 | 1.5214 | 0.4244 | 2.90 | 0.00 |
| Irx4_predicted       | 1392981_at   | 3.1936 | 1.5899 | 0.4978 | 2.89 | 0.00 |
| LOC298018            | 1392227_at   | 4.6234 | 1.5158 | 0.3279 | 2.89 | 0.00 |
| Comtd1_predicted     | 1373150_at   | 5.4453 | 1.5289 | 0.2808 | 2.88 | 0.00 |
| Mki67_predicted      | 1374775_at   | 2.8805 | 1.4735 | 0.5115 | 2.87 | 0.01 |
| NA                   | 1393522_at   | 2.0795 | 1.3445 | 0.6466 | 2.87 | 0.04 |
| Cdc20                | 1387895_s_at | 2.7263 | 1.4524 | 0.5327 | 2.87 | 0.02 |
| Pank3_predicted      | 1391348_at   | 3.4752 | 1.5235 | 0.4384 | 2.84 | 0.00 |
| Btg2                 | 1386995_at   | 4.3698 | 1.5092 | 0.3454 | 2.84 | 0.00 |
| Nfkbia               | 1389538_at   | 4.2550 | 1.5283 | 0.3592 | 2.83 | 0.00 |
| Nup133_predicted     | 1375071_at   | 2.9670 | 1.4920 | 0.5029 | 2.83 | 0.01 |
| NA                   | 1378537_at   | 3.6493 | 1.5075 | 0.4131 | 2.83 | 0.00 |
| Elavl2               | 1383736_at   | 2.0540 | 1.3067 | 0.6362 | 2.82 | 0.04 |
| Sass6_predicted      | 1392040_at   | 2.5647 | 1.3991 | 0.5455 | 2.82 | 0.03 |
| Dctn6_predicted      | 1396392_at   | 4.7089 | 1.4994 | 0.3184 | 2.81 | 0.00 |
| RGD1305899_predicted | 1382855_at   | 3.4239 | 1.4651 | 0.4279 | 2.81 | 0.00 |
| Ptges                | 1368014_at   | 4.1090 | 1.4669 | 0.3570 | 2.81 | 0.00 |
| Slc2a1               | 1370848_at   | 4.2593 | 1.4852 | 0.3487 | 2.81 | 0.00 |
| Pmm2_predicted       | 1397458_at   | 3.0844 | 1.5757 | 0.5109 | 2.81 | 0.00 |
| Phlda1               | 1368860_at   | 3.3909 | 1.4558 | 0.4293 | 2.81 | 0.00 |
| NA                   | 1381705_at   | 3.2870 | 1.4837 | 0.4514 | 2.80 | 0.00 |
| PRP-2                | 1372702_at   | 4.2626 | 1.4778 | 0.3467 | 2.80 | 0.00 |
| Hk2                  | 1369006_at   | 2.8266 | 1.4466 | 0.5118 | 2.79 | 0.02 |
| Plk1                 | 1370297_at   | 3.2951 | 1.4757 | 0.4478 | 2.79 | 0.00 |
| Blnk                 | 1393641_at   | 3.6192 | 1.5173 | 0.4193 | 2.79 | 0.00 |
| NA                   | 1394706_at   | 3.0757 | 1.4588 | 0.4743 | 2.79 | 0.00 |

|                      |              |        |        |        |      |      |
|----------------------|--------------|--------|--------|--------|------|------|
| Cebpd                | 1368813_at   | 2.4543 | 1.6259 | 0.6625 | 2.79 | 0.04 |
| Thrsp                | 1370150_a_at | 2.6775 | 1.4656 | 0.5474 | 2.79 | 0.02 |
| Mobkl2b_predicted    | 1384900_at   | 3.1096 | 1.4699 | 0.4727 | 2.79 | 0.00 |
| Rcor1_predicted      | 1376080_at   | 3.7055 | 1.4827 | 0.4001 | 2.78 | 0.00 |
| Tmem58_predicted     | 1373486_at   | 2.4726 | 1.3566 | 0.5487 | 2.78 | 0.04 |
| Sh3bp2               | 1384968_at   | 4.0458 | 1.4862 | 0.3674 | 2.78 | 0.00 |
| Lat                  | 1368723_at   | 4.1054 | 1.4765 | 0.3597 | 2.78 | 0.00 |
| LOC290071            | 1371016_at   | 4.1410 | 1.4638 | 0.3535 | 2.78 | 0.00 |
| Tas1r2               | 1395796_at   | 3.9803 | 1.4721 | 0.3698 | 2.78 | 0.00 |
| LOC498736            | 1373718_at   | 4.0972 | 1.4931 | 0.3644 | 2.78 | 0.00 |
| RGD1565646_predicted | 1375153_at   | 3.0077 | 1.4428 | 0.4797 | 2.77 | 0.00 |
| NA                   | 1398411_at   | 2.4913 | 1.3938 | 0.5595 | 2.77 | 0.03 |
| NA                   | 1381503_at   | 2.8838 | 1.5472 | 0.5365 | 2.77 | 0.01 |
| NA                   | 1390364_at   | 3.5622 | 1.4637 | 0.4109 | 2.76 | 0.00 |
| Got2                 | 1393167_at   | 5.7256 | 1.4707 | 0.2569 | 2.76 | 0.00 |
| Slc39a10_predicted   | 1373677_at   | 3.6614 | 1.4302 | 0.3906 | 2.76 | 0.00 |
| Paics                | 1375924_at   | 2.9210 | 1.4034 | 0.4804 | 2.76 | 0.01 |
| Cenpe_predicted      | 1389542_at   | 3.4459 | 1.4403 | 0.4180 | 2.75 | 0.00 |
| Mcpt3                | 1388231_at   | 2.8690 | 1.3781 | 0.4803 | 2.74 | 0.01 |
| RGD1307201_predicted | 1382459_at   | 2.1526 | 1.3147 | 0.6107 | 2.74 | 0.04 |
| Tlr4                 | 1387982_at   | 4.5731 | 1.4645 | 0.3202 | 2.74 | 0.00 |
| Cdkn3_predicted      | 1372685_at   | 3.1606 | 1.4361 | 0.4544 | 2.74 | 0.00 |
| NA                   | 1389986_at   | 3.2949 | 1.4992 | 0.4550 | 2.74 | 0.00 |
| Hs3st1               | 1370834_at   | 4.4575 | 1.4642 | 0.3285 | 2.74 | 0.00 |
| Ddah1                | 1387111_at   | 2.6652 | 1.4561 | 0.5463 | 2.73 | 0.02 |
| Racgap1_predicted    | 1384259_at   | 2.9553 | 1.4057 | 0.4756 | 2.73 | 0.01 |
| Cd96                 | 1382507_at   | 4.1127 | 1.4568 | 0.3542 | 2.72 | 0.00 |
| Racgap1_predicted    | 1373658_at   | 2.9580 | 1.4164 | 0.4789 | 2.72 | 0.01 |
| Scarb1               | 1367855_at   | 3.2999 | 1.5164 | 0.4595 | 2.72 | 0.00 |
| LOC681870            | 1393816_at   | 2.5934 | 1.3610 | 0.5248 | 2.72 | 0.03 |
| Akr1b8               | 1370902_at   | 2.8744 | 1.4488 | 0.5040 | 2.72 | 0.01 |
| Ms4a7_predicted      | 1378193_at   | 2.3667 | 1.4265 | 0.6027 | 2.71 | 0.04 |
| Msn                  | 1368948_at   | 2.8719 | 1.3770 | 0.4795 | 2.71 | 0.01 |
| Top2a                | 1372186_a_at | 2.7231 | 1.3879 | 0.5097 | 2.71 | 0.02 |
| LOC681012            | 1395402_at   | 2.9208 | 1.4866 | 0.5090 | 2.71 | 0.01 |
| Cst7_predicted       | 1382622_at   | 2.7789 | 1.4900 | 0.5362 | 2.71 | 0.02 |
| Ect2_predicted       | 1383747_at   | 3.0031 | 1.4056 | 0.4680 | 2.71 | 0.00 |
| Sp1                  | 1369247_at   | 2.6135 | 1.3705 | 0.5244 | 2.70 | 0.02 |
| Ggt1                 | 1368374_a_at | 2.6710 | 1.5061 | 0.5639 | 2.70 | 0.02 |
| Snx10                | 1379275_at   | 3.8646 | 1.4367 | 0.3718 | 2.70 | 0.00 |
| Ptges                | 1368015_at   | 4.0594 | 1.4097 | 0.3473 | 2.69 | 0.00 |
| Jmjd3_predicted      | 1390000_at   | 3.0460 | 1.5001 | 0.4925 | 2.68 | 0.00 |
| Palmd                | 1382864_at   | 4.7406 | 1.4171 | 0.2989 | 2.68 | 0.00 |
| Cdca1                | 1383940_at   | 3.0408 | 1.4285 | 0.4698 | 2.68 | 0.00 |
| Tubb2b               | 1388131_at   | 3.7144 | 1.4602 | 0.3931 | 2.68 | 0.00 |
| Tas1r2               | 1382743_at   | 3.9182 | 1.4415 | 0.3679 | 2.68 | 0.00 |
| RGD1310784_predicted | 1391317_at   | 2.2840 | 1.3489 | 0.5906 | 2.68 | 0.04 |
| Il1rn                | 1387835_at   | 3.2185 | 1.4367 | 0.4464 | 2.67 | 0.00 |
| Icos                 | 1370769_a_at | 3.1697 | 1.4621 | 0.4613 | 2.67 | 0.00 |
| Il17f                | 1377264_at   | 1.6561 | 2.5278 | 1.5263 | 2.67 | 0.05 |
| Plk2                 | 1368106_at   | 3.6983 | 1.4126 | 0.3820 | 2.66 | 0.00 |
| Gdpd1_predicted      | 1385302_at   | 2.8472 | 1.4145 | 0.4968 | 2.66 | 0.01 |
| Nr4a1                | 1386935_at   | 2.4827 | 1.3186 | 0.5311 | 2.66 | 0.03 |
| Cdc2a                | 1367776_at   | 2.5289 | 1.3641 | 0.5394 | 2.66 | 0.03 |
| Sat                  | 1371774_at   | 4.4475 | 1.4069 | 0.3163 | 2.66 | 0.00 |



|                      |              |        |        |        |      |      |
|----------------------|--------------|--------|--------|--------|------|------|
| NA                   | 1397728_at   | 3.6485 | 1.3944 | 0.3822 | 2.65 | 0.00 |
| RGD1560020_predicted | 1391878_at   | 2.3043 | 1.3105 | 0.5687 | 2.64 | 0.04 |
| Bub1_predicted       | 1385086_at   | 2.7756 | 1.3538 | 0.4877 | 2.64 | 0.02 |
| Gla                  | 1382063_at   | 4.9534 | 1.3910 | 0.2808 | 2.63 | 0.00 |
| RGD1565140_predicted | 1382692_at   | 2.3289 | 1.3148 | 0.5645 | 2.63 | 0.04 |
| Kif11                | 1385619_at   | 2.9585 | 1.4048 | 0.4748 | 2.62 | 0.01 |
| Plscr1               | 1369029_at   | 3.0700 | 1.3457 | 0.4383 | 2.61 | 0.00 |
| Epha2_predicted      | 1374143_at   | 4.2933 | 1.3978 | 0.3256 | 2.61 | 0.00 |
| Cyr61                | 1368290_at   | 1.2053 | 1.0409 | 0.8636 | 2.61 | 0.14 |
| Nsf                  | 1369690_at   | 4.0848 | 1.3682 | 0.3349 | 2.61 | 0.00 |
| NA                   | 1378890_at   | 2.2541 | 1.2586 | 0.5584 | 2.61 | 0.04 |
| NA                   | 1378133_at   | 3.1312 | 1.4264 | 0.4555 | 2.61 | 0.00 |
| Akt2                 | 1387353_at   | 2.3322 | 1.5920 | 0.6826 | 2.60 | 0.04 |
| NA                   | 1380897_at   | 4.5583 | 1.3710 | 0.3008 | 2.60 | 0.00 |
| RT1-Bb               | 1371033_at   | 1.4310 | 2.5032 | 1.7493 | 2.59 | 0.08 |
| NA                   | 1392633_at   | 2.3530 | 1.3016 | 0.5532 | 2.59 | 0.04 |
| Aurkb                | 1368260_at   | 2.8380 | 1.3512 | 0.4761 | 2.59 | 0.02 |
| Cfb                  | 1389470_at   | 2.4938 | 1.4638 | 0.5870 | 2.59 | 0.03 |
| Icos                 | 1393329_at   | 2.9373 | 1.4393 | 0.4900 | 2.59 | 0.01 |
| Nnmt_predicted       | 1379812_at   | 2.4670 | 1.2804 | 0.5190 | 2.59 | 0.04 |
| Bst1                 | 1369294_at   | 3.0235 | 1.3434 | 0.4443 | 2.58 | 0.00 |
| NA                   | 1385978_at   | 1.7813 | 1.1832 | 0.6643 | 2.58 | 0.05 |
| Kif2c                | 1369380_at   | 1.7755 | 1.1721 | 0.6601 | 2.58 | 0.05 |
| RT1-Aw2              | 1371210_s_at | 1.0281 | 0.9378 | 0.9122 | 2.58 | 0.30 |
| Xtrp3                | 1369705_at   | 2.7094 | 1.3824 | 0.5102 | 2.57 | 0.02 |
| Hist1h4a_predicted   | 1388276_at   | 2.6052 | 1.3046 | 0.5007 | 2.57 | 0.02 |
| Bub1b                | 1383926_at   | 2.6610 | 1.3257 | 0.4982 | 2.57 | 0.02 |
| Tacc3                | 1372886_at   | 2.9544 | 1.3416 | 0.4541 | 2.57 | 0.01 |
| NA                   | 1384415_at   | 3.8250 | 1.3438 | 0.3513 | 2.56 | 0.00 |
| RT1-Aw2              | 1394803_at   | 1.3284 | 1.0049 | 0.7565 | 2.56 | 0.10 |
| NA                   | 1390556_at   | 3.5553 | 1.3754 | 0.3869 | 2.56 | 0.00 |
| Ocm                  | 1370477_at   | 2.4295 | 1.3796 | 0.5679 | 2.56 | 0.04 |
| Batf_predicted       | 1382663_at   | 3.5348 | 1.3722 | 0.3882 | 2.56 | 0.00 |
| Ttk_predicted        | 1397476_at   | 2.7994 | 1.2961 | 0.4630 | 2.56 | 0.02 |
| Cflar                | 1379679_at   | 2.2308 | 1.2167 | 0.5454 | 2.55 | 0.04 |
| Ibrdc3_predicted     | 1382074_at   | 4.2228 | 1.3539 | 0.3206 | 2.55 | 0.00 |
| RGD1306658           | 1392579_at   | 3.1361 | 1.3138 | 0.4189 | 2.55 | 0.00 |
| Sftpc                | 1370255_at   | 3.2111 | 1.3109 | 0.4083 | 2.55 | 0.00 |
| Runx1                | 1368914_at   | 3.5055 | 1.3572 | 0.3872 | 2.55 | 0.00 |
| NA                   | 1371394_x_at | 2.2921 | 1.2283 | 0.5359 | 2.54 | 0.04 |
| Dusp1                | 1368146_at   | 3.0135 | 1.3152 | 0.4365 | 2.53 | 0.00 |
| Hist1h4b             | 1374600_at   | 4.5099 | 1.3386 | 0.2968 | 2.53 | 0.00 |
| NA                   | 1379690_at   | 2.6407 | 1.4375 | 0.5444 | 2.53 | 0.02 |
| NA                   | 1398528_at   | 2.9853 | 1.3226 | 0.4430 | 2.52 | 0.00 |
| NA                   | 1391719_at   | 4.0351 | 1.3423 | 0.3327 | 2.52 | 0.00 |
| Mad211_predicted     | 1376951_at   | 2.2708 | 1.2726 | 0.5604 | 2.52 | 0.04 |
| RGD1566211_predicted | 1382603_at   | 1.8306 | 1.6683 | 0.9113 | 2.52 | 0.05 |
| Aspm_predicted       | 1393581_at   | 2.7342 | 1.2994 | 0.4752 | 2.52 | 0.02 |
| LOC499300            | 1372852_at   | 3.4307 | 1.3171 | 0.3839 | 2.52 | 0.00 |
| Spag5                | 1370999_at   | 2.9616 | 1.2950 | 0.4372 | 2.52 | 0.01 |
| S100a9               | 1387125_at   | 1.6521 | 3.1891 | 1.9303 | 2.51 | 0.05 |
| Palmd                | 1376924_a_at | 4.1833 | 1.3186 | 0.3152 | 2.51 | 0.00 |
| Traf4af1             | 1397609_at   | 2.9340 | 1.2931 | 0.4407 | 2.51 | 0.01 |
| Ptprc                | 1370603_a_at | 4.4184 | 1.3314 | 0.3013 | 2.51 | 0.00 |
| Lxn                  | 1367768_at   | 2.0790 | 1.1776 | 0.5664 | 2.50 | 0.04 |

|                      |              |        |        |        |      |      |
|----------------------|--------------|--------|--------|--------|------|------|
| Itgal                | 1393347_at   | 3.6396 | 1.3154 | 0.3614 | 2.50 | 0.00 |
| Rcc2_predicted       | 1395396_at   | 2.7420 | 1.3492 | 0.4921 | 2.50 | 0.02 |
| Bcl11b_predicted     | 1378520_at   | 3.3775 | 1.3123 | 0.3885 | 2.49 | 0.00 |
| LOC679298            | 1395044_at   | 2.5360 | 1.3416 | 0.5290 | 2.48 | 0.03 |
| RGD1559690_predicted | 1378906_at   | 2.0096 | 1.1605 | 0.5775 | 2.48 | 0.04 |
| Melk_predicted       | 1389756_at   | 2.4364 | 1.2755 | 0.5235 | 2.47 | 0.04 |
| Slc23a2              | 1369378_at   | 2.9433 | 1.3253 | 0.4503 | 2.47 | 0.01 |
| Cldn1                | 1396150_at   | 2.8794 | 1.3365 | 0.4642 | 2.46 | 0.01 |
| Thbs1                | 1374529_at   | 4.1236 | 1.2929 | 0.3135 | 2.46 | 0.00 |
| Cd44                 | 1387952_a_at | 4.0222 | 1.3040 | 0.3242 | 2.46 | 0.00 |
| Odz2                 | 1395836_at   | 4.2468 | 1.3080 | 0.3080 | 2.46 | 0.00 |
| NA                   | 1376943_at   | 3.0678 | 1.2926 | 0.4214 | 2.45 | 0.00 |
| Map4k4_predicted     | 1373863_at   | 3.7483 | 1.3112 | 0.3498 | 2.45 | 0.00 |
| MGC125004            | 1393791_at   | 2.6467 | 1.2631 | 0.4772 | 2.45 | 0.02 |
| Il2rg                | 1389092_at   | 3.4821 | 1.2962 | 0.3722 | 2.45 | 0.00 |
| Traf4af1             | 1390137_at   | 3.0802 | 1.2727 | 0.4132 | 2.45 | 0.00 |
| Pctp                 | 1387058_at   | 3.3880 | 1.2693 | 0.3747 | 2.44 | 0.00 |
| Scd2                 | 1386889_at   | 2.0734 | 1.4977 | 0.7223 | 2.44 | 0.04 |
| RGD1562047_predicted | 1373823_at   | 2.8145 | 1.2787 | 0.4543 | 2.43 | 0.02 |
| NA                   | 1382493_at   | 2.8945 | 1.2702 | 0.4388 | 2.43 | 0.01 |
| NA                   | 1388010_at   | 2.6575 | 1.2210 | 0.4595 | 2.43 | 0.02 |
| Cdca8                | 1371928_at   | 2.7616 | 1.2411 | 0.4494 | 2.43 | 0.02 |
| F2rl2                | 1384165_at   | 1.8645 | 1.1215 | 0.6015 | 2.43 | 0.05 |
| Eif4g1               | 1385152_at   | 2.7700 | 1.2510 | 0.4516 | 2.43 | 0.02 |
| NA                   | 1395442_at   | 3.2901 | 1.2777 | 0.3883 | 2.43 | 0.00 |
| Arsb                 | 1371021_at   | 2.7025 | 1.3151 | 0.4866 | 2.43 | 0.02 |
| Ctsc                 | 1368280_at   | 3.9699 | 1.2693 | 0.3197 | 2.42 | 0.00 |
| NA                   | 1392296_at   | 2.8725 | 1.2796 | 0.4455 | 2.42 | 0.01 |
| Trib1                | 1371019_at   | 3.1692 | 1.2793 | 0.4037 | 2.42 | 0.00 |
| Uox                  | 1387963_a_at | 1.6148 | 2.2636 | 1.4018 | 2.41 | 0.06 |
| Ube2g2_predicted     | 1380157_at   | 2.3981 | 1.3930 | 0.5809 | 2.41 | 0.04 |
| Zfand2a              | 1373767_at   | 2.7939 | 1.2151 | 0.4349 | 2.41 | 0.02 |
| RGD1305179_predicted | 1391222_at   | 3.9752 | 1.2675 | 0.3189 | 2.41 | 0.00 |
| Cd3g                 | 1384787_at   | 3.1890 | 1.2500 | 0.3920 | 2.40 | 0.00 |
| Lck                  | 1383320_at   | 3.6803 | 1.2661 | 0.3440 | 2.40 | 0.00 |
| Prc1_predicted       | 1392899_at   | 2.6009 | 1.2212 | 0.4695 | 2.40 | 0.02 |
| RGD1561386_predicted | 1380069_at   | 3.7538 | 1.2800 | 0.3410 | 2.40 | 0.00 |
| Bcl2a1               | 1368482_at   | 2.5487 | 1.2803 | 0.5023 | 2.40 | 0.03 |
| Cldn1                | 1387470_at   | 2.4995 | 1.2757 | 0.5104 | 2.39 | 0.03 |
| RGD1563547_predicted | 1383221_at   | 3.4535 | 1.2414 | 0.3594 | 2.39 | 0.00 |
| Sp1                  | 1392180_at   | 3.2960 | 1.2404 | 0.3763 | 2.39 | 0.00 |
| Nbeal2_predicted     | 1378286_at   | 2.7033 | 1.3186 | 0.4878 | 2.39 | 0.02 |
| Id1                  | 1387028_a_at | 3.0665 | 1.2948 | 0.4222 | 2.39 | 0.00 |
| Kif11                | 1390891_at   | 2.7638 | 1.2518 | 0.4529 | 2.39 | 0.02 |
| Lgals3bp             | 1387946_at   | 4.0238 | 1.2516 | 0.3110 | 2.39 | 0.00 |
| RGD1310360           | 1372903_at   | 2.4340 | 1.1896 | 0.4887 | 2.38 | 0.04 |
| Kpna2                | 1367683_at   | 2.9953 | 1.2374 | 0.4131 | 2.38 | 0.00 |
| Klk10                | 1380083_at   | 2.4784 | 1.3663 | 0.5513 | 2.38 | 0.03 |
| MGC72974             | 1380668_at   | 3.4395 | 1.2279 | 0.3570 | 2.38 | 0.00 |
| Ca4                  | 1368437_at   | 2.1110 | 1.1500 | 0.5448 | 2.38 | 0.04 |
| NA                   | 1398348_at   | 2.5292 | 1.2310 | 0.4867 | 2.38 | 0.03 |
| Spn                  | 1370987_at   | 3.2581 | 1.2572 | 0.3859 | 2.38 | 0.00 |
| Rcc2_predicted       | 1382832_at   | 2.4019 | 1.3643 | 0.5680 | 2.38 | 0.04 |
| Slc20a1              | 1370314_at   | 2.6389 | 1.2013 | 0.4552 | 2.38 | 0.02 |
| RGD1307679           | 1391893_at   | 3.2141 | 1.2317 | 0.3832 | 2.37 | 0.00 |

|                      |              |        |        |        |      |      |
|----------------------|--------------|--------|--------|--------|------|------|
| Fgfbp1               | 1368349_at   | 3.4870 | 1.2539 | 0.3596 | 2.37 | 0.00 |
| Rhcg                 | 1376487_at   | 2.2499 | 1.1732 | 0.5214 | 2.37 | 0.04 |
| Fgf13                | 1368114_at   | 4.4550 | 1.2398 | 0.2783 | 2.37 | 0.00 |
| NA                   | 1375612_at   | 3.4244 | 1.2345 | 0.3605 | 2.37 | 0.00 |
| RGD1565644_predicted | 1384865_at   | 3.3581 | 1.2242 | 0.3645 | 2.36 | 0.00 |
| Lypla2               | 1367458_at   | 2.8236 | 1.3035 | 0.4616 | 2.36 | 0.02 |
| S100a8               | 1368494_at   | 1.5639 | 2.8752 | 1.8385 | 2.36 | 0.06 |
| Bpy2ip1_predicted    | 1374271_at   | 4.4156 | 1.2292 | 0.2784 | 2.35 | 0.00 |
| NA                   | 1390415_at   | 2.4131 | 1.1723 | 0.4858 | 2.35 | 0.04 |
| Arhgap1_predicted    | 1393113_at   | 2.8097 | 1.1878 | 0.4228 | 2.35 | 0.02 |
| Arf3                 | 1387447_at   | 3.0161 | 1.2356 | 0.4097 | 2.35 | 0.00 |
| Ccne1                | 1373530_at   | 2.6134 | 1.2051 | 0.4611 | 2.35 | 0.02 |
| NA                   | 1393163_at   | 3.2523 | 1.2482 | 0.3838 | 2.34 | 0.00 |
| Rasal2_predicted     | 1378740_at   | 3.7080 | 1.2400 | 0.3344 | 2.34 | 0.00 |
| Cxcl1                | 1387316_at   | 1.8311 | 1.6163 | 0.8827 | 2.34 | 0.05 |
| Atp6v0a4_predicted   | 1379741_at   | 2.2117 | 1.2266 | 0.5546 | 2.34 | 0.04 |
| Dlg7_predicted       | 1376684_at   | 3.3443 | 1.2051 | 0.3603 | 2.34 | 0.00 |
| Plk4_predicted       | 1377832_at   | 1.9737 | 1.1109 | 0.5628 | 2.33 | 0.04 |
| Nolc1                | 1368033_at   | 2.1957 | 1.1857 | 0.5400 | 2.33 | 0.04 |
| Gch                  | 1380230_at   | 2.5170 | 1.2199 | 0.4847 | 2.33 | 0.03 |
| Nsf                  | 1369689_at   | 3.2370 | 1.2068 | 0.3728 | 2.33 | 0.00 |
| Slc4a8               | 1374095_at   | 2.6411 | 1.1703 | 0.4431 | 2.33 | 0.02 |
| Dnajb1_predicted     | 1383302_at   | 3.1381 | 1.2463 | 0.3971 | 2.33 | 0.00 |
| Slc38a1              | 1370409_at   | 3.4971 | 1.2018 | 0.3436 | 2.32 | 0.00 |
| Nusap1_predicted     | 1392732_at   | 2.7928 | 1.2114 | 0.4337 | 2.32 | 0.02 |
| Socs3                | 1369584_at   | 2.6025 | 1.2110 | 0.4653 | 2.32 | 0.02 |
| RGD1306734_predicted | 1398618_s_at | 2.6156 | 1.1543 | 0.4413 | 2.32 | 0.02 |
| Asb1_predicted       | 1381002_at   | 1.8553 | 1.0522 | 0.5671 | 2.32 | 0.05 |
| LOC363174            | 1384762_at   | 2.9510 | 1.1776 | 0.3990 | 2.32 | 0.01 |
| Cdca2                | 1383958_at   | 2.3991 | 1.1502 | 0.4794 | 2.31 | 0.04 |
| Itga6                | 1371186_at   | 2.7283 | 1.2061 | 0.4421 | 2.31 | 0.02 |
| LOC306464            | 1393844_at   | 2.5429 | 1.1897 | 0.4678 | 2.31 | 0.03 |
| RGD1309107           | 1394419_at   | 2.4902 | 1.1700 | 0.4699 | 2.31 | 0.03 |
| Elavl2               | 1383768_at   | 1.9771 | 1.0966 | 0.5546 | 2.31 | 0.04 |
| NA                   | 1394972_at   | 2.2920 | 1.1190 | 0.4882 | 2.31 | 0.04 |
| Myh9                 | 1387402_at   | 2.4221 | 1.2626 | 0.5213 | 2.30 | 0.04 |
| NA                   | 1381632_at   | 3.1772 | 1.1961 | 0.3765 | 2.30 | 0.00 |
| NA                   | 1384174_at   | 1.9148 | 1.0778 | 0.5629 | 2.30 | 0.05 |
| RGD1305486           | 1395535_at   | 2.6046 | 1.2205 | 0.4686 | 2.30 | 0.02 |
| RGD1565023_predicted | 1372322_at   | 2.7342 | 1.2081 | 0.4418 | 2.30 | 0.02 |
| lfnar1_predicted     | 1375696_at   | 2.6218 | 1.2180 | 0.4646 | 2.29 | 0.02 |
| LOC681730            | 1370821_at   | 3.1347 | 1.1895 | 0.3795 | 2.29 | 0.00 |
| Rplp1                | 1385220_at   | 2.0191 | 1.0892 | 0.5395 | 2.29 | 0.04 |
| Icos                 | 1368783_at   | 2.7910 | 1.2389 | 0.4439 | 2.29 | 0.02 |
| Efnb1                | 1369476_at   | 2.6523 | 1.1397 | 0.4297 | 2.29 | 0.02 |
| LOC498113            | 1388277_at   | 2.2551 | 1.1235 | 0.4982 | 2.29 | 0.04 |
| Elavl1_predicted     | 1391743_at   | 4.0269 | 1.1934 | 0.2963 | 2.29 | 0.00 |
| NA                   | 1378413_at   | 3.3722 | 1.2137 | 0.3599 | 2.29 | 0.00 |
| Kctd11_predicted     | 1385226_at   | 3.2669 | 1.1889 | 0.3639 | 2.29 | 0.00 |
| Stard4_predicted     | 1396521_at   | 3.4896 | 1.1779 | 0.3376 | 2.28 | 0.00 |
| Sipa1l2              | 1376040_at   | 4.1371 | 1.1932 | 0.2884 | 2.28 | 0.00 |
| NA                   | 1375155_at   | 2.9064 | 1.1645 | 0.4007 | 2.28 | 0.01 |
| Ankrd52_predicted    | 1375212_at   | 2.3890 | 1.1743 | 0.4915 | 2.28 | 0.04 |
| RGD1562563_predicted | 1394585_at   | 2.6392 | 1.2665 | 0.4799 | 2.28 | 0.02 |
| Sele                 | 1388018_at   | 1.6012 | 1.2324 | 0.7697 | 2.28 | 0.06 |

|                      |              |        |        |        |      |      |
|----------------------|--------------|--------|--------|--------|------|------|
| Odz2                 | 1368993_at   | 3.9802 | 1.1957 | 0.3004 | 2.28 | 0.00 |
| NA                   | 1394883_at   | 2.7302 | 1.1514 | 0.4217 | 2.28 | 0.02 |
| RGD1305671_predicted | 1395349_at   | 3.4299 | 1.2014 | 0.3503 | 2.27 | 0.00 |
| LOC681012            | 1375252_at   | 2.7518 | 1.1723 | 0.4260 | 2.27 | 0.02 |
| NA                   | 1378982_at   | 3.5546 | 1.1966 | 0.3366 | 2.27 | 0.00 |
| Cpne8_predicted      | 1391830_at   | 3.9401 | 1.1773 | 0.2988 | 2.27 | 0.00 |
| Nrg1                 | 1369783_a_at | 2.2017 | 1.1389 | 0.5173 | 2.27 | 0.04 |
| Btbd3_predicted      | 1382478_at   | 2.7127 | 1.1656 | 0.4297 | 2.26 | 0.02 |
| RGD1560834_predicted | 1398217_at   | 3.4277 | 1.1835 | 0.3453 | 2.26 | 0.00 |
| Thrsp                | 1371400_at   | 2.5201 | 1.1485 | 0.4557 | 2.26 | 0.03 |
| Ppm1j                | 1374310_at   | 2.5586 | 1.2367 | 0.4834 | 2.26 | 0.03 |
| Hal                  | 1387307_at   | 1.2916 | 0.9823 | 0.7606 | 2.26 | 0.12 |
| Aff4_predicted       | 1397386_at   | 3.0472 | 1.1404 | 0.3742 | 2.26 | 0.00 |
| CxCl3 (Gm1960)       | 1370634_x_at | 1.8617 | 1.0394 | 0.5583 | 2.25 | 0.05 |
| Cotl1_predicted      | 1388596_at   | 3.1662 | 1.1617 | 0.3669 | 2.25 | 0.00 |
| NA                   | 1391517_at   | 2.9503 | 1.1779 | 0.3992 | 2.25 | 0.01 |
| Ube2b                | 1380087_at   | 2.0877 | 1.2875 | 0.6167 | 2.25 | 0.04 |
| NA                   | 1388872_at   | 3.7223 | 1.1647 | 0.3129 | 2.25 | 0.00 |
| Rhoc_predicted       | 1371659_at   | 2.5531 | 1.2334 | 0.4831 | 2.24 | 0.03 |
| Cldn1                | 1383946_at   | 2.2537 | 1.1696 | 0.5190 | 2.24 | 0.04 |
| Net1                 | 1381781_at   | 3.3864 | 1.1480 | 0.3390 | 2.24 | 0.00 |
| Sult1d1              | 1369047_at   | 2.3432 | 1.1008 | 0.4698 | 2.24 | 0.04 |
| Ehbp1_predicted      | 1373217_at   | 2.1566 | 1.0882 | 0.5046 | 2.24 | 0.04 |
| Crb3                 | 1384531_at   | 2.6088 | 1.2478 | 0.4783 | 2.24 | 0.02 |
| NA                   | 1377994_at   | 2.7772 | 1.1223 | 0.4041 | 2.24 | 0.02 |
| Mobk1a_predicted     | 1380144_at   | 3.3800 | 1.1659 | 0.3450 | 2.24 | 0.00 |
| Sbf1_predicted       | 1377174_at   | 2.1303 | 1.3399 | 0.6290 | 2.24 | 0.04 |
| NA                   | 1384702_at   | 2.9855 | 1.1547 | 0.3868 | 2.24 | 0.00 |
| Hif1a                | 1387076_at   | 4.7243 | 1.1592 | 0.2454 | 2.24 | 0.00 |
| RGD1308324_predicted | 1393086_at   | 3.1021 | 1.1776 | 0.3796 | 2.24 | 0.00 |
| Thbs1                | 1394109_at   | 3.7044 | 1.1596 | 0.3130 | 2.24 | 0.00 |
| Sell                 | 1369801_at   | 2.0089 | 1.0642 | 0.5298 | 2.23 | 0.04 |
| Sstr2                | 1368782_at   | 2.0398 | 1.2680 | 0.6216 | 2.23 | 0.04 |
| Il9r                 | 1369359_at   | 2.3949 | 1.1034 | 0.4607 | 2.23 | 0.04 |
| Eif3s8               | 1397674_at   | 2.6382 | 1.1886 | 0.4505 | 2.23 | 0.02 |
| RGD1308432_predicted | 1396203_at   | 2.7737 | 1.1504 | 0.4148 | 2.23 | 0.02 |
| Rg9mtd2              | 1395118_at   | 2.8244 | 1.1290 | 0.3997 | 2.23 | 0.02 |
| NA                   | 1384280_at   | 2.7027 | 1.1484 | 0.4249 | 2.23 | 0.02 |
| Atp8b1_predicted     | 1391693_at   | 3.5718 | 1.1437 | 0.3202 | 2.23 | 0.00 |
| NA                   | 1395758_at   | 2.5467 | 1.1240 | 0.4413 | 2.22 | 0.03 |
| Zbtb7b_predicted     | 1385398_at   | 2.6470 | 1.1381 | 0.4300 | 2.22 | 0.02 |
| Plek                 | 1390687_at   | 2.8755 | 1.1518 | 0.4006 | 2.22 | 0.01 |
| NA                   | 1375732_at   | 2.7962 | 1.1685 | 0.4179 | 2.22 | 0.02 |
| Mobk1a_predicted     | 1397533_at   | 2.1010 | 1.0687 | 0.5087 | 2.22 | 0.04 |
| NA                   | 1373053_at   | 0.8894 | 1.2606 | 1.4173 | 2.22 | 0.43 |
| NA                   | 1381482_at   | 2.9491 | 1.1442 | 0.3880 | 2.21 | 0.01 |
| Ccr4                 | 1369555_at   | 2.2212 | 1.1447 | 0.5153 | 2.21 | 0.04 |
| Cebpa                | 1369658_at   | 2.3062 | 1.2465 | 0.5405 | 2.21 | 0.04 |
| LOC680308            | 1372808_at   | 2.8537 | 1.1300 | 0.3960 | 2.21 | 0.01 |
| Cit                  | 1389137_at   | 3.0389 | 1.1286 | 0.3714 | 2.21 | 0.00 |
| Upp1                 | 1372691_at   | 3.3857 | 1.1415 | 0.3372 | 2.21 | 0.00 |
| NA                   | 1391027_at   | 3.5082 | 1.1434 | 0.3259 | 2.21 | 0.00 |
| NA                   | 1395944_at   | 2.0322 | 1.0886 | 0.5357 | 2.21 | 0.04 |
| Sdfr2_predicted      | 1378160_at   | 3.4200 | 1.1437 | 0.3344 | 2.20 | 0.00 |
| Mipep                | 1397644_at   | 2.8613 | 1.1060 | 0.3865 | 2.20 | 0.01 |

|                      |              |        |        |        |      |      |
|----------------------|--------------|--------|--------|--------|------|------|
| Pigt_predicted       | 1379515_at   | 2.0421 | 1.2723 | 0.6230 | 2.20 | 0.04 |
| Cdc20                | 1389506_x_at | 2.2827 | 1.0792 | 0.4728 | 2.20 | 0.04 |
| LOC363198            | 1393158_at   | 2.5019 | 1.1362 | 0.4541 | 2.20 | 0.03 |
| Pcdhb21_predicted    | 1388340_at   | 1.8185 | 1.1015 | 0.6057 | 2.20 | 0.05 |
| Rps6ka6_predicted    | 1389735_at   | 3.7100 | 1.1272 | 0.3038 | 2.19 | 0.00 |
| Sec61a1              | 1382615_at   | 2.6232 | 1.1652 | 0.4442 | 2.19 | 0.02 |
| Ssr3                 | 1369718_at   | 3.1577 | 1.1246 | 0.3561 | 2.19 | 0.00 |
| Marcks               | 1370948_a_at | 2.9762 | 1.1139 | 0.3743 | 2.19 | 0.00 |
| Sema3f_predicted     | 1377892_at   | 2.2423 | 1.2679 | 0.5655 | 2.19 | 0.04 |
| Pgsg                 | 1368655_at   | 2.7888 | 1.1545 | 0.4140 | 2.19 | 0.02 |
| Nr2f6                | 1370380_s_at | 3.0171 | 1.1483 | 0.3806 | 2.19 | 0.00 |
| Cebpd                | 1387343_at   | 2.0729 | 1.2453 | 0.6007 | 2.18 | 0.04 |
| Dusp7                | 1377992_at   | 4.1700 | 1.1284 | 0.2706 | 2.18 | 0.00 |
| Zfp36                | 1387870_at   | 2.9193 | 1.0930 | 0.3744 | 2.18 | 0.01 |
| Tpr                  | 1382939_at   | 2.9849 | 1.1292 | 0.3783 | 2.18 | 0.00 |
| NA                   | 1376837_at   | 2.6414 | 1.0893 | 0.4124 | 2.18 | 0.02 |
| Hcst                 | 1385440_at   | 3.4251 | 1.1370 | 0.3320 | 2.18 | 0.00 |
| Casp6                | 1368305_at   | 3.6536 | 1.1241 | 0.3077 | 2.18 | 0.00 |
| Pdlim5               | 1368703_at   | 3.1201 | 1.1145 | 0.3572 | 2.17 | 0.00 |
| RGD1305797_predicted | 1395879_at   | 2.4926 | 1.1411 | 0.4578 | 2.17 | 0.03 |
| Dhrs1                | 1391259_at   | 2.6522 | 1.1429 | 0.4309 | 2.17 | 0.02 |
| RGD1311136           | 1376303_a_at | 2.1082 | 1.3025 | 0.6178 | 2.17 | 0.04 |
| Trerf1_predicted     | 1378617_at   | 3.0543 | 1.1020 | 0.3608 | 2.17 | 0.00 |
| Tmem49               | 1370807_at   | 2.5731 | 1.0797 | 0.4196 | 2.17 | 0.03 |
| Tmem97               | 1396086_at   | 2.2717 | 1.0817 | 0.4761 | 2.16 | 0.04 |
| Cd3z                 | 1370621_at   | 2.8509 | 1.1421 | 0.4006 | 2.16 | 0.01 |
| Plac8_predicted      | 1371447_at   | 2.6052 | 1.1406 | 0.4378 | 2.16 | 0.02 |
| Mgp                  | 1392578_at   | 1.9339 | 1.0442 | 0.5400 | 2.16 | 0.05 |
| Ckap2_predicted      | 1384068_at   | 2.3381 | 1.0642 | 0.4551 | 2.16 | 0.04 |
| NA                   | 1383111_at   | 2.2470 | 1.0693 | 0.4759 | 2.16 | 0.04 |
| LOC499991            | 1385397_at   | 1.8344 | 1.0770 | 0.5871 | 2.16 | 0.05 |
| RGD1565356_predicted | 1397167_at   | 2.4807 | 1.0937 | 0.4409 | 2.15 | 0.03 |
| Tsn                  | 1367728_at   | 2.7007 | 1.1420 | 0.4229 | 2.15 | 0.02 |
| NA                   | 1378801_at   | 2.8749 | 1.0922 | 0.3799 | 2.15 | 0.01 |
| Akt2                 | 1368832_at   | 2.1641 | 1.2460 | 0.5757 | 2.15 | 0.04 |
| NA                   | 1383637_at   | 2.9142 | 1.0956 | 0.3759 | 2.15 | 0.01 |
| Ripx                 | 1378194_a_at | 2.9546 | 1.0781 | 0.3649 | 2.15 | 0.01 |
| NA                   | 1386855_at   | 2.5094 | 1.0582 | 0.4217 | 2.15 | 0.03 |
| RGD1562378_predicted | 1392476_at   | 2.4802 | 1.0461 | 0.4218 | 2.14 | 0.03 |
| NA                   | 1390100_s_at | 2.4800 | 1.1306 | 0.4559 | 2.14 | 0.03 |
| Ppm1k_predicted      | 1394939_at   | 2.1413 | 1.0310 | 0.4815 | 2.14 | 0.04 |
| Xrn2_predicted       | 1393702_at   | 3.4590 | 1.0974 | 0.3173 | 2.14 | 0.00 |
| Sp1                  | 1392631_at   | 2.9877 | 1.0800 | 0.3615 | 2.14 | 0.00 |
| Hnrpa2b1_predicted   | 1395561_at   | 2.9278 | 1.1035 | 0.3769 | 2.14 | 0.01 |
| Sdad1                | 1390704_at   | 2.5900 | 1.0974 | 0.4237 | 2.14 | 0.03 |
| LOC678905            | 1390053_at   | 2.8090 | 1.0838 | 0.3858 | 2.14 | 0.02 |
| Ube2e2               | 1376438_at   | 2.4928 | 1.1565 | 0.4639 | 2.14 | 0.03 |
| Cdkn2b               | 1369193_at   | 3.1581 | 1.0936 | 0.3463 | 2.14 | 0.00 |
| NA                   | 1378654_at   | 3.0157 | 1.0939 | 0.3627 | 2.13 | 0.00 |
| Hk2                  | 1383519_at   | 2.8819 | 1.0865 | 0.3770 | 2.13 | 0.01 |
|                      | AFFX_Rat_GAP |        |        |        |      |      |
| Gapdh                | DH_5_at      | 2.1980 | 1.2108 | 0.5509 | 2.13 | 0.04 |
| Hist1h2bh            | 1390021_at   | 2.5795 | 1.0570 | 0.4098 | 2.13 | 0.03 |
| Ubd                  | 1368762_at   | 2.0606 | 1.1951 | 0.5800 | 2.13 | 0.04 |
| NA                   | 1381560_at   | 3.0697 | 1.0740 | 0.3499 | 2.12 | 0.00 |

|                      |              |        |        |        |      |      |
|----------------------|--------------|--------|--------|--------|------|------|
| B4galnt1             | 1398272_at   | 3.1617 | 1.0923 | 0.3455 | 2.12 | 0.00 |
| Rap1ga1              | 1373631_at   | 2.8164 | 1.1053 | 0.3924 | 2.12 | 0.02 |
| Tmsb10               | 1367655_at   | 2.6549 | 1.0603 | 0.3994 | 2.12 | 0.02 |
| NA                   | 1379739_at   | 2.8834 | 1.0813 | 0.3750 | 2.12 | 0.01 |
| Spbc24_predicted     | 1373026_at   | 2.1482 | 1.0600 | 0.4934 | 2.12 | 0.04 |
| Shmt2                | 1388695_at   | 2.1577 | 1.0288 | 0.4768 | 2.12 | 0.04 |
| Ctsc                 | 1397808_at   | 3.7540 | 1.0795 | 0.2876 | 2.12 | 0.00 |
| Marcks               | 1370949_at   | 3.1403 | 1.0747 | 0.3422 | 2.12 | 0.00 |
| RGD1565734_predicted | 1385781_at   | 2.3319 | 1.0437 | 0.4476 | 2.12 | 0.04 |
| LOC304743            | 1385269_s_at | 1.9864 | 1.0067 | 0.5068 | 2.12 | 0.04 |
| Kcnh1                | 1368061_at   | 2.3678 | 1.0372 | 0.4380 | 2.12 | 0.04 |
| Tk1                  | 1372631_at   | 2.2065 | 1.0396 | 0.4711 | 2.11 | 0.04 |
| Arhgdia              | 1398108_at   | 2.6374 | 1.0484 | 0.3975 | 2.11 | 0.02 |
| NA                   | 1391979_at   | 2.9035 | 1.0884 | 0.3749 | 2.11 | 0.01 |
| RGD1561386_predicted | 1379603_at   | 4.3673 | 1.0790 | 0.2471 | 2.11 | 0.00 |
| Ppp4r1               | 1387858_at   | 2.5675 | 1.1314 | 0.4407 | 2.10 | 0.03 |
| RGD1307791_predicted | 1375627_at   | 2.1469 | 1.1643 | 0.5423 | 2.10 | 0.04 |
| Baz1a_predicted      | 1377727_at   | 3.3347 | 1.0777 | 0.3232 | 2.09 | 0.00 |
| Eif3s10              | 1379485_at   | 2.8017 | 1.0800 | 0.3855 | 2.09 | 0.02 |
| Lrrc8                | 1382920_at   | 3.0307 | 1.0625 | 0.3506 | 2.09 | 0.00 |
| Tns4                 | 1378947_at   | 2.5053 | 1.0389 | 0.4147 | 2.09 | 0.03 |
| Tnfrsf12a            | 1371785_at   | 2.0778 | 1.0086 | 0.4854 | 2.09 | 0.04 |
| Nolc1                | 1368032_at   | 2.4674 | 1.0375 | 0.4205 | 2.09 | 0.04 |
| Esp1_predicted       | 1376084_a_at | 2.2747 | 1.0109 | 0.4444 | 2.09 | 0.04 |
| NA                   | 1383727_at   | 2.7408 | 1.0310 | 0.3762 | 2.09 | 0.02 |
| Gdpd1_predicted      | 1378235_at   | 2.5680 | 1.0559 | 0.4112 | 2.09 | 0.03 |
| RT1-Bb               | 1370382_at   | 1.9851 | 1.1293 | 0.5689 | 2.08 | 0.04 |
| Gprk6                | 1388066_a_at | 2.2560 | 1.1482 | 0.5090 | 2.08 | 0.04 |
| Hmgb2                | 1367676_at   | 2.7655 | 1.0486 | 0.3792 | 2.08 | 0.02 |
| Dyrk3                | 1383853_at   | 2.8764 | 1.0541 | 0.3665 | 2.08 | 0.01 |
| Atp1b3               | 1377195_at   | 2.5051 | 1.0692 | 0.4268 | 2.08 | 0.03 |
| Cd37                 | 1368555_at   | 2.6187 | 1.0418 | 0.3978 | 2.08 | 0.02 |
| NA                   | 1376157_at   | 3.5394 | 1.0630 | 0.3003 | 2.08 | 0.00 |
| NA                   | 1378833_at   | 2.6175 | 1.0214 | 0.3902 | 2.08 | 0.02 |
| Mafb                 | 1387947_at   | 3.2642 | 1.0431 | 0.3195 | 2.08 | 0.00 |
| Gtf2ird1             | 1375808_at   | 1.8721 | 1.2320 | 0.6581 | 2.08 | 0.05 |
| Mmp12                | 1368530_at   | 2.1450 | 1.0474 | 0.4883 | 2.07 | 0.04 |
| LOC290396            | 1376377_at   | 2.2656 | 0.9976 | 0.4403 | 2.07 | 0.04 |
| Vdac1                | 1386909_a_at | 2.4944 | 1.1167 | 0.4477 | 2.07 | 0.03 |
| Ube2l6               | 1373037_at   | 2.9012 | 1.0331 | 0.3561 | 2.07 | 0.01 |
| Sp1                  | 1379384_at   | 2.8479 | 1.0263 | 0.3604 | 2.07 | 0.01 |
| NA                   | 1391674_at   | 2.7134 | 1.0331 | 0.3808 | 2.07 | 0.02 |
| RGD1563001_predicted | 1375362_at   | 3.3933 | 1.0568 | 0.3114 | 2.07 | 0.00 |
| Lbr                  | 1370136_at   | 3.1078 | 1.0549 | 0.3394 | 2.07 | 0.00 |
| RGD1560812_predicted | 1383001_at   | 2.3851 | 1.0101 | 0.4235 | 2.07 | 0.04 |
| Ns5atp9              | 1381434_s_at | 2.7703 | 1.0200 | 0.3682 | 2.07 | 0.02 |
| Cd69                 | 1384837_at   | 2.2131 | 1.0872 | 0.4913 | 2.07 | 0.04 |
| Ptprc                | 1390798_at   | 2.8726 | 1.0609 | 0.3693 | 2.07 | 0.01 |
| Ddx21a               | 1396187_at   | 2.4783 | 1.0246 | 0.4134 | 2.07 | 0.03 |
| Rhov                 | 1370627_at   | 2.5170 | 1.0412 | 0.4137 | 2.07 | 0.03 |
| Nudt9                | 1373840_at   | 3.3784 | 1.0389 | 0.3075 | 2.07 | 0.00 |
| Slc28a3              | 1369447_at   | 3.0322 | 1.0442 | 0.3444 | 2.06 | 0.00 |
| Rnd3                 | 1377663_at   | 4.1156 | 1.0447 | 0.2538 | 2.06 | 0.00 |
| NA                   | 1395574_at   | 3.5728 | 1.0442 | 0.2923 | 2.06 | 0.00 |
| Dsg1c_predicted      | 1385018_at   | 2.4822 | 1.0607 | 0.4273 | 2.06 | 0.03 |

|                      |              |        |        |        |      |      |
|----------------------|--------------|--------|--------|--------|------|------|
| Fshprh1              | 1368773_at   | 1.8745 | 0.9636 | 0.5141 | 2.06 | 0.05 |
| Acaca                | 1387538_at   | 2.5551 | 1.0713 | 0.4193 | 2.06 | 0.03 |
| Sertad2              | 1375279_at   | 3.2900 | 1.0435 | 0.3172 | 2.05 | 0.00 |
| RGD1560391_predicted | 1374778_at   | 3.7513 | 1.0316 | 0.2750 | 2.05 | 0.00 |
| Pon3                 | 1384544_at   | 2.4301 | 1.0430 | 0.4292 | 2.05 | 0.04 |
| Nppb                 | 1367616_at   | 2.7371 | 1.0235 | 0.3739 | 2.05 | 0.02 |
| Gch                  | 1368503_at   | 2.2685 | 1.0730 | 0.4730 | 2.05 | 0.04 |
| Syngn2               | 1369554_at   | 1.9488 | 1.1872 | 0.6092 | 2.05 | 0.05 |
| Msr2_predicted       | 1395126_at   | 2.7620 | 1.0210 | 0.3697 | 2.04 | 0.02 |
| RGD1307394_predicted | 1382196_at   | 3.1234 | 1.0397 | 0.3329 | 2.04 | 0.00 |
| Cad                  | 1385437_at   | 2.4805 | 1.0222 | 0.4121 | 2.04 | 0.03 |
| Sla                  | 1379766_at   | 3.4380 | 1.0315 | 0.3000 | 2.04 | 0.00 |
| Pld3                 | 1371961_at   | 2.5744 | 1.0686 | 0.4151 | 2.04 | 0.03 |
| LOC362419            | 1381003_at   | 3.5515 | 1.0249 | 0.2886 | 2.04 | 0.00 |
| Atp7a                | 1369342_at   | 2.3374 | 1.0364 | 0.4434 | 2.04 | 0.04 |
| NA                   | 1398481_at   | 3.3160 | 1.0258 | 0.3094 | 2.04 | 0.00 |
| Asf1b_predicted      | 1383684_at   | 1.8566 | 0.9983 | 0.5377 | 2.04 | 0.05 |
| Atp2c2               | 1387310_at   | 2.4644 | 1.0678 | 0.4333 | 2.04 | 0.04 |
| Nrg1                 | 1371212_at   | 2.0667 | 0.9747 | 0.4716 | 2.03 | 0.04 |
| Rps6ka4_predicted    | 1375741_at   | 2.2478 | 1.0736 | 0.4776 | 2.03 | 0.04 |
| RGD1561123_predicted | 1380077_at   | 3.1682 | 1.0247 | 0.3234 | 2.03 | 0.00 |
| NA                   | 1385986_at   | 3.4796 | 1.0292 | 0.2958 | 2.03 | 0.00 |
| LOC360919            | 1383605_at   | 2.2455 | 0.9682 | 0.4312 | 2.03 | 0.04 |
| Lasp1                | 1387844_at   | 2.9946 | 1.0275 | 0.3431 | 2.03 | 0.00 |
| Ube2v1_predicted     | 1395426_at   | 2.2432 | 1.0796 | 0.4813 | 2.03 | 0.04 |
| Lyn                  | 1387277_at   | 2.6518 | 1.0055 | 0.3792 | 2.03 | 0.02 |
| Rgs5                 | 1369957_at   | 2.8427 | 1.0447 | 0.3675 | 2.03 | 0.01 |
| Eprs                 | 1382040_at   | 2.1341 | 0.9943 | 0.4659 | 2.02 | 0.04 |
| Rnf12                | 1390524_at   | 2.7604 | 0.9909 | 0.3590 | 2.02 | 0.02 |
| Orm1                 | 1368731_at   | 1.3463 | 0.8914 | 0.6621 | 2.02 | 0.10 |
| Dnajc5               | 1369813_at   | 2.7014 | 0.9995 | 0.3700 | 2.02 | 0.02 |
| Jub                  | 1388230_at   | 2.4796 | 1.0108 | 0.4077 | 2.02 | 0.03 |
| Ssr1                 | 1390767_at   | 3.0183 | 1.0015 | 0.3318 | 2.02 | 0.00 |
| Nfkb1                | 1370968_at   | 3.2908 | 1.0187 | 0.3096 | 2.01 | 0.00 |
| Bpgm                 | 1383551_at   | 1.8785 | 0.9284 | 0.4942 | 2.01 | 0.05 |
| RGD1359509           | 1373866_at   | 3.7806 | 1.0042 | 0.2656 | 2.01 | 0.00 |
| Hif1a                | 1368149_at   | 3.0775 | 1.0040 | 0.3262 | 2.01 | 0.00 |
| Ptpn22_predicted     | 1381357_at   | 2.5076 | 0.9821 | 0.3916 | 2.01 | 0.03 |
| RGD1562451_predicted | 1382443_at   | 2.2357 | 1.0527 | 0.4709 | 2.01 | 0.04 |
| NA                   | 1377637_at   | 2.2860 | 0.9675 | 0.4232 | 2.01 | 0.04 |
| Acp6                 | 1396167_at   | 3.0530 | 1.0215 | 0.3346 | 2.01 | 0.00 |
| NA                   | 1374987_at   | 2.5247 | 1.0034 | 0.3974 | 2.01 | 0.03 |
| Fgr                  | 1368693_at   | 2.3019 | 1.0139 | 0.4405 | 2.01 | 0.04 |
| LOC500420            | 1374953_at   | 2.0987 | 0.9846 | 0.4691 | 2.01 | 0.04 |
| Gtf2a1               | 1369548_at   | 2.3155 | 0.9882 | 0.4268 | 2.01 | 0.04 |
| Dusp2                | 1377023_at   | 3.9238 | 1.0044 | 0.2560 | 2.00 | 0.00 |
| RGD1560608_predicted | 1394411_at   | 2.7833 | 0.9944 | 0.3573 | 2.00 | 0.02 |
| Nedd4a               | 1395157_at   | 2.4981 | 1.0097 | 0.4042 | 2.00 | 0.03 |
| RGD1310052_predicted | 1397515_at   | 2.8305 | 0.9943 | 0.3513 | 2.00 | 0.02 |
| NA                   | 1377151_at   | 1.9296 | 0.9931 | 0.5146 | 2.00 | 0.05 |
| Noxo1_predicted      | 1379081_at   | 2.8554 | 1.0070 | 0.3527 | 2.00 | 0.01 |
| NA                   | 1391552_at   | 1.9458 | 0.9227 | 0.4742 | 2.00 | 0.05 |
| Camk2d               | 1371263_a_at | 2.5442 | 0.9965 | 0.3917 | 2.00 | 0.03 |
| Marcks               | 1388157_at   | 2.8895 | 0.9794 | 0.3389 | 2.00 | 0.01 |
| Eif4g1               | 1390340_a_at | 2.5466 | 1.0100 | 0.3966 | 2.00 | 0.03 |

|                |            |        |        |        |      |      |
|----------------|------------|--------|--------|--------|------|------|
| Sbf1_predicted | 1397522_at | 1.9600 | 1.1765 | 0.6002 | 2.00 | 0.05 |
| Gch            | 1387221_at | 2.3504 | 1.0250 | 0.4361 | 2.00 | 0.04 |
| NA             | 1376969_at | 2.1076 | 1.0745 | 0.5098 | 2.00 | 0.04 |

| 1251 Down-regulated Genes associated with ZD | Affymetrix Probe ID* | Score (d) | Numerator (r) | Denominator (s+s0) | Fold-Change** | q-value(%) |
|----------------------------------------------|----------------------|-----------|---------------|--------------------|---------------|------------|
| NA                                           | 1379888_at           | -11.3760  | -5.1669       | 0.4542             | 0.03          | 0.00       |
| LOC687873                                    | 1398090_at           | -10.3264  | -4.9889       | 0.4831             | 0.03          | 0.00       |
| DLP2                                         | 1385559_at           | -9.9914   | -4.9582       | 0.4962             | 0.03          | 0.00       |
| Fxyd4                                        | 1387092_at           | -6.9748   | -4.5505       | 0.6524             | 0.04          | 0.00       |
| Elmod1_predicted                             | 1389781_at           | -5.7922   | -5.1050       | 0.8814             | 0.04          | 0.00       |
| RGD1304904_predicted                         | 1385129_at           | -9.0338   | -4.6784       | 0.5179             | 0.04          | 0.00       |
| Slurp1_predicted                             | 1373493_at           | -9.1678   | -4.6526       | 0.5075             | 0.04          | 0.00       |
| NA                                           | 1374241_at           | -8.7450   | -4.4603       | 0.5100             | 0.05          | 0.00       |
| NA                                           | 1397903_at           | -8.7015   | -4.1753       | 0.4798             | 0.05          | 0.00       |
| RGD1565626_predicted                         | 1392080_at           | -4.2244   | -4.7450       | 1.1232             | 0.06          | 0.00       |
| P2rx2                                        | 1387578_a_at         | -6.5122   | -4.0152       | 0.6166             | 0.06          | 0.00       |
| RGD1559748_predicted                         | 1383203_at           | -4.3823   | -4.2170       | 0.9623             | 0.06          | 0.00       |
| RGD1311975                                   | 1384491_at           | -5.8081   | -3.9985       | 0.6884             | 0.06          | 0.00       |
| NA                                           | 1392136_at           | -3.5883   | -4.7702       | 1.3294             | 0.06          | 0.00       |
| Upk1b                                        | 1383875_at           | -9.5445   | -3.9192       | 0.4106             | 0.07          | 0.00       |
| NA                                           | 1373167_at           | -8.8660   | -3.8928       | 0.4391             | 0.07          | 0.00       |
| LOC686143                                    | 1381286_at           | -6.1459   | -4.0166       | 0.6535             | 0.07          | 0.00       |
| RGD1565626_predicted                         | 1384999_at           | -3.5322   | -4.7155       | 1.3350             | 0.07          | 0.00       |
| Adh6a_predicted                              | 1381756_at           | -4.8150   | -3.4950       | 0.7259             | 0.07          | 0.00       |
| Cyp26b1                                      | 1384392_at           | -9.2992   | -3.7335       | 0.4015             | 0.07          | 0.00       |
| RGD1565626_predicted                         | 1384803_at           | -4.3624   | -4.2344       | 0.9706             | 0.08          | 0.00       |
| LOC679461                                    | 1384961_at           | -3.1208   | -4.6242       | 1.4817             | 0.08          | 0.00       |
| NA                                           | 1384236_at           | -4.3773   | -4.0029       | 0.9145             | 0.08          | 0.00       |
| RGD1309879                                   | 1377307_at           | -5.6868   | -3.7567       | 0.6606             | 0.08          | 0.00       |
| Fetub                                        | 1387082_at           | -5.0202   | -3.7186       | 0.7407             | 0.08          | 0.00       |
| NA                                           | 1391504_at           | -4.9399   | -3.8195       | 0.7732             | 0.09          | 0.00       |
| RGD1563131_predicted                         | 1397173_at           | -5.0785   | -3.3842       | 0.6664             | 0.10          | 0.00       |
| Cryba4                                       | 1367608_at           | -3.3588   | -3.0041       | 0.8944             | 0.10          | 0.00       |
| Tmem86a_predicted                            | 1373309_at           | -5.2796   | -3.3851       | 0.6412             | 0.10          | 0.00       |
| NA                                           | 1382031_at           | -7.1723   | -3.3333       | 0.4647             | 0.10          | 0.00       |
| Gdpd2_predicted                              | 1383546_at           | -6.1494   | -3.3493       | 0.5447             | 0.10          | 0.00       |
| RGD1565626_predicted                         | 1374986_x_at         | -5.5927   | -3.4170       | 0.6110             | 0.10          | 0.00       |
| B0at1                                        | 1398463_at           | -4.6714   | -3.4981       | 0.7488             | 0.10          | 0.00       |
| LOC681124                                    | 1392804_at           | -4.0768   | -3.5273       | 0.8652             | 0.11          | 0.00       |
| P2rx2                                        | 1369475_x_at         | -5.2346   | -3.0388       | 0.5805             | 0.11          | 0.00       |
| Fgf3                                         | 1387532_at           | -8.2785   | -3.1753       | 0.3836             | 0.11          | 0.00       |
| Hsd11b2                                      | 1368102_at           | -6.2821   | -3.1568       | 0.5025             | 0.11          | 0.00       |
| RGD1309610_predicted                         | 1383432_at           | -4.3475   | -3.3956       | 0.7811             | 0.12          | 0.00       |
| Ptgds                                        | 1367851_at           | -8.0976   | -3.0987       | 0.3827             | 0.12          | 0.00       |
| NA                                           | 1395770_at           | -2.5064   | -2.6200       | 1.0453             | 0.12          | 0.01       |
| Cte1                                         | 1398250_at           | -3.9864   | -2.8423       | 0.7130             | 0.12          | 0.00       |
| LOC361776                                    | 1373254_at           | -2.0858   | -2.6610       | 1.2757             | 0.12          | 0.02       |
| NA                                           | 1392597_at           | -5.1996   | -3.2001       | 0.6155             | 0.12          | 0.00       |
| NA                                           | 1393018_at           | -5.4364   | -2.9541       | 0.5434             | 0.12          | 0.00       |
| Cdh16                                        | 1390822_at           | -4.9220   | -3.2352       | 0.6573             | 0.12          | 0.00       |
| RGD1311155                                   | 1389581_at           | -6.0868   | -2.9613       | 0.4865             | 0.13          | 0.00       |
| RGD1563692_predicted                         | 1394408_at           | -6.1239   | -3.0762       | 0.5023             | 0.13          | 0.00       |
| Slc15a1                                      | 1369381_a_at         | -4.0115   | -3.2864       | 0.8192             | 0.13          | 0.00       |



|                      |              |         |         |        |      |      |
|----------------------|--------------|---------|---------|--------|------|------|
| Fmo2                 | 1377635_at   | -7.0551 | -2.9466 | 0.4177 | 0.13 | 0.00 |
| RGD1308195_predicted | 1392821_at   | -5.3021 | -2.9622 | 0.5587 | 0.14 | 0.00 |
| NA                   | 1372381_at   | -5.2963 | -2.8027 | 0.5292 | 0.14 | 0.00 |
| Sts                  | 1368372_at   | -6.8559 | -2.8593 | 0.4171 | 0.14 | 0.00 |
| Ryr3                 | 1398479_at   | -7.2130 | -2.8314 | 0.3925 | 0.14 | 0.00 |
| RGD1311589_predicted | 1374142_at   | -6.9402 | -2.8512 | 0.4108 | 0.14 | 0.00 |
| LOC367994            | 1389503_at   | -5.9147 | -2.8686 | 0.4850 | 0.14 | 0.00 |
| NA                   | 1382324_at   | -5.2030 | -2.8942 | 0.5563 | 0.14 | 0.00 |
| NA                   | 1390601_at   | -5.7295 | -2.7314 | 0.4767 | 0.15 | 0.00 |
| RGD1310552_predicted | 1374574_at   | -4.6005 | -2.9078 | 0.6321 | 0.15 | 0.00 |
| NA                   | 1393109_at   | -5.9281 | -2.7031 | 0.4560 | 0.15 | 0.00 |
| NA                   | 1398433_at   | -5.4438 | -2.6649 | 0.4895 | 0.15 | 0.00 |
| RGD1564128_predicted | 1385682_at   | -5.7930 | -2.8019 | 0.4837 | 0.15 | 0.00 |
| Dkk4_predicted       | 1397684_at   | -4.7717 | -2.7885 | 0.5844 | 0.15 | 0.00 |
| Pdlim3               | 1370291_at   | -7.6421 | -2.7115 | 0.3548 | 0.15 | 0.00 |
| NA                   | 1384474_at   | -3.5850 | -2.4814 | 0.6922 | 0.16 | 0.00 |
| Cpe                  | 1386921_at   | -7.2947 | -2.6598 | 0.3646 | 0.16 | 0.00 |
| LOC684050            | 1373368_at   | -6.1886 | -2.7090 | 0.4377 | 0.16 | 0.00 |
| Irx3_predicted       | 1390776_at   | -6.9377 | -2.6231 | 0.3781 | 0.16 | 0.00 |
| Gsta3                | 1367774_at   | -5.2428 | -2.6749 | 0.5102 | 0.16 | 0.00 |
| Kb1                  | 1370868_at   | -2.5050 | -3.0047 | 1.1995 | 0.16 | 0.01 |
| NA                   | 1371089_at   | -4.5775 | -2.7247 | 0.5952 | 0.16 | 0.00 |
| Oact2                | 1392943_at   | -4.8423 | -2.6605 | 0.5494 | 0.16 | 0.00 |
| Fmo3                 | 1368304_at   | -5.6068 | -2.6790 | 0.4778 | 0.17 | 0.00 |
| Cobl_predicted       | 1384834_at   | -5.2672 | -2.6702 | 0.5070 | 0.17 | 0.00 |
| NA                   | 1384743_at   | -4.5311 | -2.7600 | 0.6091 | 0.17 | 0.00 |
| NA                   | 1390182_at   | -3.3908 | -2.9510 | 0.8703 | 0.17 | 0.00 |
| Dhrs10               | 1391800_at   | -6.5912 | -2.5982 | 0.3942 | 0.17 | 0.00 |
| Ubl3                 | 1383223_at   | -5.6619 | -2.5810 | 0.4559 | 0.17 | 0.00 |
| Nrtn                 | 1374048_at   | -4.4440 | -2.7065 | 0.6090 | 0.17 | 0.00 |
| NA                   | 1382347_at   | -2.9517 | -2.9955 | 1.0149 | 0.17 | 0.00 |
| NA                   | 1376457_at   | -4.3033 | -2.4556 | 0.5706 | 0.17 | 0.00 |
| Ggh                  | 1368470_at   | -5.2891 | -2.4756 | 0.4681 | 0.17 | 0.00 |
| Cyp2a3a              | 1369136_at   | -3.9392 | -2.3774 | 0.6035 | 0.18 | 0.00 |
| Frmpl1_predicted     | 1377693_at   | -4.3666 | -2.6270 | 0.6016 | 0.18 | 0.00 |
| Actn3                | 1367962_at   | -4.4507 | -2.4207 | 0.5439 | 0.18 | 0.00 |
| NA                   | 1370078_at   | -4.9824 | -2.4260 | 0.4869 | 0.18 | 0.00 |
| NA                   | 1373886_at   | -5.5894 | -2.4427 | 0.4370 | 0.18 | 0.00 |
| Pvalb                | 1370214_at   | -4.4465 | -2.5860 | 0.5816 | 0.18 | 0.00 |
| Hspb6                | 1387898_at   | -9.6509 | -2.4533 | 0.2542 | 0.18 | 0.00 |
| NA                   | 1380143_at   | -5.2045 | -2.5313 | 0.4864 | 0.18 | 0.00 |
| RGD1563441_predicted | 1393565_at   | -6.2892 | -2.4265 | 0.3858 | 0.18 | 0.00 |
| Hpd                  | 1368188_at   | -3.7197 | -2.6226 | 0.7051 | 0.18 | 0.00 |
| Clu                  | 1367784_a_at | -6.2838 | -2.4577 | 0.3911 | 0.19 | 0.00 |
| Myl9_predicted       | 1388298_at   | -5.5274 | -2.4209 | 0.4380 | 0.19 | 0.00 |
| Cyb5r2               | 1391430_at   | -4.7624 | -2.3982 | 0.5036 | 0.19 | 0.00 |
| LOC684884            | 1386049_at   | -3.9039 | -2.5611 | 0.6560 | 0.19 | 0.00 |
| Cryab                | 1370026_at   | -5.3438 | -2.4195 | 0.4528 | 0.19 | 0.00 |
| RGD1310552_predicted | 1393352_at   | -3.9825 | -2.5348 | 0.6365 | 0.19 | 0.00 |
| RGD1564335_predicted | 1393510_at   | -6.5226 | -2.3729 | 0.3638 | 0.19 | 0.00 |
| Selenbp1             | 1367673_at   | -5.0972 | -2.4007 | 0.4710 | 0.19 | 0.00 |
| Cnn1                 | 1367785_at   | -4.9917 | -2.3532 | 0.4714 | 0.19 | 0.00 |
| NA                   | 1390913_at   | -4.3665 | -2.5103 | 0.5749 | 0.19 | 0.00 |
| NA                   | 1385098_at   | -4.6215 | -2.4125 | 0.5220 | 0.20 | 0.00 |
| LOC686098            | 1380940_at   | -4.6093 | -2.3931 | 0.5192 | 0.20 | 0.00 |

|                      |              |         |         |        |      |      |
|----------------------|--------------|---------|---------|--------|------|------|
| Id4                  | 1394022_at   | -6.5788 | -2.3056 | 0.3505 | 0.20 | 0.00 |
| RGD1307150_predicted | 1371677_at   | -4.0680 | -2.4000 | 0.5900 | 0.20 | 0.00 |
| Mtac2d1              | 1383606_at   | -4.9295 | -2.4076 | 0.4884 | 0.20 | 0.00 |
| NA                   | 1381350_at   | -5.4638 | -2.2900 | 0.4191 | 0.20 | 0.00 |
| NA                   | 1393210_at   | -4.7692 | -2.3083 | 0.4840 | 0.20 | 0.00 |
| Ln timer_predicted   | 1389464_at   | -4.6456 | -2.3516 | 0.5062 | 0.20 | 0.00 |
| Bmp6                 | 1388920_at   | -5.7906 | -2.3423 | 0.4045 | 0.20 | 0.00 |
| RGD1562284_predicted | 1377867_at   | -4.0872 | -2.3493 | 0.5748 | 0.20 | 0.00 |
| NA                   | 1383557_at   | -5.2402 | -2.3707 | 0.4524 | 0.20 | 0.00 |
| Mypn_predicted       | 1374088_at   | -5.2270 | -2.2903 | 0.4382 | 0.20 | 0.00 |
| NA                   | 1376398_at   | -5.4724 | -2.2961 | 0.4196 | 0.20 | 0.00 |
| Lrat                 | 1368570_at   | -4.5065 | -2.2762 | 0.5051 | 0.20 | 0.00 |
| Klk6                 | 1368384_at   | -2.0941 | -2.6221 | 1.2521 | 0.20 | 0.02 |
| Plagl1               | 1387122_at   | -5.0022 | -2.3383 | 0.4675 | 0.20 | 0.00 |
| RGD1564074_predicted | 1388916_at   | -6.7856 | -2.3023 | 0.3393 | 0.20 | 0.00 |
| Ogn_predicted        | 1385248_a_at | -3.9619 | -2.3127 | 0.5837 | 0.20 | 0.00 |
| Dkk4_predicted       | 1385444_at   | -5.6850 | -2.2626 | 0.3980 | 0.21 | 0.00 |
| NA                   | 1397166_at   | -4.0419 | -2.3820 | 0.5893 | 0.21 | 0.00 |
| LOC684884            | 1396388_at   | -3.8720 | -2.4063 | 0.6215 | 0.21 | 0.00 |
| Lypd2_predicted      | 1375132_at   | -6.8680 | -2.2514 | 0.3278 | 0.21 | 0.00 |
| NA                   | 1380799_at   | -5.1376 | -2.3172 | 0.4510 | 0.21 | 0.00 |
| Tspyl4               | 1390097_at   | -4.0615 | -2.1683 | 0.5339 | 0.21 | 0.00 |
| Actg2                | 1386869_at   | -4.3194 | -2.3096 | 0.5347 | 0.21 | 0.00 |
| Hspb8                | 1388721_at   | -7.6537 | -2.2524 | 0.2943 | 0.21 | 0.00 |
| NA                   | 1385558_at   | -3.4193 | -2.4510 | 0.7168 | 0.21 | 0.00 |
| NA                   | 1383939_at   | -6.1950 | -2.2184 | 0.3581 | 0.21 | 0.00 |
| NA                   | 1394517_at   | -3.5737 | -2.0952 | 0.5863 | 0.21 | 0.00 |
| NA                   | 1374290_at   | -4.6495 | -2.1970 | 0.4725 | 0.21 | 0.00 |
| Eps8l1_predicted     | 1384079_at   | -4.0700 | -2.3204 | 0.5701 | 0.21 | 0.00 |
| Slc23a1              | 1369169_at   | -5.0527 | -2.1786 | 0.4312 | 0.21 | 0.00 |
| NA                   | 1377795_at   | -4.3927 | -2.2176 | 0.5048 | 0.21 | 0.00 |
| Myf6                 | 1387181_at   | -3.9041 | -2.2895 | 0.5864 | 0.21 | 0.00 |
| NA                   | 1372390_at   | -3.3800 | -2.0985 | 0.6209 | 0.21 | 0.00 |
| NA                   | 1397901_at   | -5.0574 | -2.2585 | 0.4466 | 0.22 | 0.00 |
| Apobec2_predicted    | 1371492_at   | -3.9943 | -2.2955 | 0.5747 | 0.22 | 0.00 |
| Bhlhb5_predicted     | 1393708_at   | -4.1297 | -2.2149 | 0.5363 | 0.22 | 0.00 |
| RGD1560859_predicted | 1372418_at   | -3.3957 | -2.4308 | 0.7158 | 0.22 | 0.00 |
| RGD1563465_predicted | 1376311_at   | -5.1178 | -2.1484 | 0.4198 | 0.22 | 0.00 |
| Cldn10_predicted     | 1372492_at   | -2.9753 | -2.2176 | 0.7453 | 0.22 | 0.00 |
| Ppp1r14a             | 1367813_at   | -4.8173 | -2.1884 | 0.4543 | 0.22 | 0.00 |
| NA                   | 1375959_at   | -5.7083 | -2.1690 | 0.3800 | 0.22 | 0.00 |
| Cyp1b1               | 1368990_at   | -5.8529 | -2.1947 | 0.3750 | 0.22 | 0.00 |
| Dmn                  | 1372658_at   | -5.3997 | -2.1688 | 0.4017 | 0.22 | 0.00 |
| Myh8                 | 1378698_at   | -3.9275 | -2.1441 | 0.5459 | 0.22 | 0.00 |
| Ssg1                 | 1370161_at   | -4.1761 | -2.1872 | 0.5237 | 0.22 | 0.00 |
| Actc1                | 1374353_x_at | -4.2537 | -2.1229 | 0.4991 | 0.22 | 0.00 |
| NA                   | 1373130_at   | -4.2653 | -2.1863 | 0.5126 | 0.22 | 0.00 |
| Kb40                 | 1378317_at   | -4.8204 | -2.2035 | 0.4571 | 0.22 | 0.00 |
| Tacr2                | 1387754_at   | -3.8103 | -2.1053 | 0.5525 | 0.22 | 0.00 |
| NA                   | 1378163_at   | -6.5277 | -2.1825 | 0.3343 | 0.22 | 0.00 |
| NA                   | 1383164_at   | -4.8188 | -2.1949 | 0.4555 | 0.22 | 0.00 |
| Kprp                 | 1378449_at   | -2.7062 | -2.5479 | 0.9415 | 0.22 | 0.01 |
| Actc1                | 1374352_at   | -4.0992 | -2.1112 | 0.5150 | 0.22 | 0.00 |
| Dmpk_predicted       | 1373915_at   | -6.4618 | -2.1532 | 0.3332 | 0.23 | 0.00 |
| RGD1564935_predicted | 1370896_a_at | -5.8723 | -2.1299 | 0.3627 | 0.23 | 0.00 |

|                      |              |         |         |        |      |      |
|----------------------|--------------|---------|---------|--------|------|------|
| Stag3                | 1368613_at   | -5.2895 | -2.1148 | 0.3998 | 0.23 | 0.00 |
| LOC678810            | 1390912_at   | -4.6563 | -2.1902 | 0.4704 | 0.23 | 0.00 |
| Tagln                | 1367570_at   | -4.9740 | -2.1685 | 0.4360 | 0.23 | 0.00 |
| NA                   | 1380013_at   | -4.4201 | -2.1959 | 0.4968 | 0.23 | 0.00 |
| Sod3                 | 1368322_at   | -5.4199 | -2.1645 | 0.3994 | 0.23 | 0.00 |
| NA                   | 1379382_at   | -5.0774 | -2.1807 | 0.4295 | 0.23 | 0.00 |
| LOC679990            | 1374969_at   | -5.2520 | -2.1013 | 0.4001 | 0.23 | 0.00 |
| NA                   | 1389462_at   | -4.2123 | -2.1480 | 0.5099 | 0.23 | 0.00 |
| NA                   | 1385983_at   | -5.9645 | -2.1168 | 0.3549 | 0.23 | 0.00 |
| Crispld2             | 1387922_at   | -3.8057 | -2.0618 | 0.5418 | 0.23 | 0.00 |
| Nexn                 | 1370697_a_at | -6.1832 | -2.1049 | 0.3404 | 0.23 | 0.00 |
| Mtap2                | 1388152_at   | -2.9709 | -2.4169 | 0.8135 | 0.23 | 0.00 |
| Actl6b_predicted     | 1382608_at   | -4.0233 | -2.1115 | 0.5248 | 0.23 | 0.00 |
| Enpp2                | 1368536_at   | -5.1908 | -2.0705 | 0.3989 | 0.23 | 0.00 |
| Oact2                | 1379075_at   | -4.4581 | -2.1171 | 0.4749 | 0.23 | 0.00 |
| Ppp1r3c              | 1373108_at   | -4.8420 | -2.0843 | 0.4305 | 0.23 | 0.00 |
| NA                   | 1388866_at   | -6.8255 | -2.1009 | 0.3078 | 0.23 | 0.00 |
| Adh1                 | 1368021_at   | -4.3163 | -2.1406 | 0.4959 | 0.23 | 0.00 |
| Lrrn3                | 1368964_at   | -4.6504 | -2.1728 | 0.4672 | 0.23 | 0.00 |
| Bbox1                | 1369546_at   | -3.7836 | -2.0749 | 0.5484 | 0.23 | 0.00 |
| Lmod1_predicted      | 1374237_at   | -5.7046 | -2.0745 | 0.3637 | 0.23 | 0.00 |
| NA                   | 1394394_at   | -4.4606 | -2.0532 | 0.4603 | 0.23 | 0.00 |
| Myl3                 | 1367572_at   | -3.3441 | -2.1906 | 0.6551 | 0.23 | 0.00 |
| NA                   | 1379467_at   | -4.8913 | -2.1450 | 0.4385 | 0.23 | 0.00 |
| Ugt8                 | 1368858_at   | -3.0676 | -1.9227 | 0.6268 | 0.23 | 0.00 |
| Actc1                | 1370856_at   | -3.8912 | -2.0719 | 0.5324 | 0.24 | 0.00 |
| Actc1                | 1385797_at   | -3.4861 | -2.0056 | 0.5753 | 0.24 | 0.00 |
| Nrep                 | 1371412_a_at | -3.5918 | -2.0771 | 0.5783 | 0.24 | 0.00 |
| Ogn_predicted        | 1383263_at   | -4.2789 | -2.0520 | 0.4796 | 0.24 | 0.00 |
| Nkd1_predicted       | 1382726_at   | -5.0589 | -2.0656 | 0.4083 | 0.24 | 0.00 |
| Pgam2                | 1367951_at   | -3.7967 | -2.0911 | 0.5508 | 0.24 | 0.00 |
| Smpx                 | 1370165_at   | -3.5301 | -2.1368 | 0.6053 | 0.24 | 0.00 |
| Kcnma1               | 1372929_at   | -4.2444 | -2.0561 | 0.4844 | 0.24 | 0.00 |
| LOC363458            | 1384276_at   | -4.3777 | -2.0050 | 0.4580 | 0.24 | 0.00 |
| Sult1a1              | 1370019_at   | -4.8633 | -2.0603 | 0.4236 | 0.24 | 0.00 |
| RGD1564108_predicted | 1393064_at   | -3.2769 | -1.9361 | 0.5909 | 0.24 | 0.00 |
| NA                   | 1375031_at   | -4.5454 | -2.0830 | 0.4583 | 0.24 | 0.00 |
| NA                   | 1376892_at   | -4.5656 | -2.0496 | 0.4489 | 0.24 | 0.00 |
| Foxg1                | 1368632_at   | -4.7596 | -2.0910 | 0.4393 | 0.24 | 0.00 |
| Aqp4                 | 1372190_at   | -6.1690 | -2.0490 | 0.3321 | 0.24 | 0.00 |
| Apeg1                | 1368001_at   | -4.6275 | -2.0096 | 0.4343 | 0.24 | 0.00 |
| LOC678810            | 1390227_at   | -5.5687 | -2.0577 | 0.3695 | 0.24 | 0.00 |
| RGD1565759_predicted | 1383704_at   | -7.0562 | -2.0406 | 0.2892 | 0.24 | 0.00 |
| Igfbp6               | 1387625_at   | -5.1148 | -2.0614 | 0.4030 | 0.24 | 0.00 |
| Omd                  | 1387197_at   | -5.5780 | -2.0290 | 0.3637 | 0.24 | 0.00 |
| Fhl1                 | 1390049_at   | -5.8006 | -2.0350 | 0.3508 | 0.24 | 0.00 |
| Pygm                 | 1383072_at   | -3.8980 | -1.9922 | 0.5111 | 0.24 | 0.00 |
| Nmbr                 | 1387515_at   | -4.4436 | -2.0193 | 0.4544 | 0.24 | 0.00 |
| NA                   | 1388349_at   | -3.4175 | -2.0810 | 0.6089 | 0.25 | 0.00 |
| LOC679341            | 1388604_at   | -3.7561 | -2.0549 | 0.5471 | 0.25 | 0.00 |
| Mest                 | 1371731_at   | -3.4694 | -2.1163 | 0.6100 | 0.25 | 0.00 |
| NA                   | 1378883_at   | -2.4553 | -1.8541 | 0.7552 | 0.25 | 0.01 |
| NA                   | 1383995_at   | -3.9360 | -1.9976 | 0.5075 | 0.25 | 0.00 |
| Cmtm8                | 1374491_at   | -3.4824 | -2.1860 | 0.6277 | 0.25 | 0.00 |
| RGD1564875_predicted | 1371984_at   | -4.3376 | -2.0520 | 0.4731 | 0.25 | 0.00 |

|                      |              |         |         |        |      |      |
|----------------------|--------------|---------|---------|--------|------|------|
| Cdo1                 | 1367755_at   | -4.2471 | -2.0020 | 0.4714 | 0.25 | 0.00 |
| RGD1561343_predicted | 1374469_at   | -3.7997 | -1.9505 | 0.5133 | 0.25 | 0.00 |
| LOC691246            | 1374311_at   | -4.5975 | -1.9809 | 0.4309 | 0.25 | 0.00 |
| Finc_predicted       | 1388496_at   | -6.0666 | -2.0112 | 0.3315 | 0.25 | 0.00 |
| NA                   | 1382964_at   | -4.2971 | -2.0647 | 0.4805 | 0.25 | 0.00 |
| NA                   | 1393075_at   | -6.0323 | -2.0050 | 0.3324 | 0.25 | 0.00 |
| Ckm                  | 1367626_at   | -3.5913 | -2.0020 | 0.5574 | 0.25 | 0.00 |
| NA                   | 1389242_at   | -6.2111 | -2.0225 | 0.3256 | 0.25 | 0.00 |
| Mybpc1               | 1374248_at   | -3.5887 | -2.0808 | 0.5798 | 0.25 | 0.00 |
| NA                   | 1378258_at   | -3.8514 | -1.9463 | 0.5054 | 0.25 | 0.00 |
| Adamts19_predicted   | 1379586_at   | -4.3703 | -1.9651 | 0.4497 | 0.25 | 0.00 |
| Amigo2               | 1373345_at   | -4.2310 | -1.9372 | 0.4579 | 0.25 | 0.00 |
| Actn2_predicted      | 1372595_at   | -3.3706 | -2.0186 | 0.5989 | 0.25 | 0.00 |
| Reck_predicted       | 1374448_at   | -5.1701 | -2.0123 | 0.3892 | 0.25 | 0.00 |
| RGD1305647_predicted | 1374391_at   | -3.4081 | -2.0822 | 0.6110 | 0.25 | 0.00 |
| Dscr111              | 1389066_at   | -5.2831 | -1.9680 | 0.3725 | 0.25 | 0.00 |
| Vsnl1                | 1398243_at   | -2.8881 | -2.0943 | 0.7251 | 0.25 | 0.01 |
| NA                   | 1374667_at   | -3.8474 | -1.9068 | 0.4956 | 0.25 | 0.00 |
| Mtap6                | 1371087_a_at | -5.5988 | -2.0090 | 0.3588 | 0.25 | 0.00 |
| Ngb                  | 1387208_at   | -3.6385 | -1.8858 | 0.5183 | 0.25 | 0.00 |
| Hspa2                | 1394200_at   | -4.1979 | -1.9403 | 0.4622 | 0.25 | 0.00 |
| Susd2_predicted      | 1398511_at   | -4.5740 | -2.0187 | 0.4413 | 0.25 | 0.00 |
| LOC679389            | 1386120_at   | -2.7512 | -1.8251 | 0.6634 | 0.26 | 0.01 |
| Usp13_predicted      | 1381605_at   | -3.7215 | -2.0281 | 0.5450 | 0.26 | 0.00 |
| NA                   | 1384709_at   | -5.4393 | -1.9572 | 0.3598 | 0.26 | 0.00 |
| Slc2a4               | 1367989_at   | -4.8517 | -1.9867 | 0.4095 | 0.26 | 0.00 |
| RGD1563599_predicted | 1372296_at   | -5.2746 | -1.9532 | 0.3703 | 0.26 | 0.00 |
| Trdn                 | 1370198_at   | -3.3073 | -1.9811 | 0.5990 | 0.26 | 0.00 |
| NA                   | 1386466_at   | -4.5243 | -1.9529 | 0.4316 | 0.26 | 0.00 |
| Trdn                 | 1384737_at   | -3.4157 | -1.9730 | 0.5776 | 0.26 | 0.00 |
| Ogn_predicted        | 1390450_a_at | -3.9720 | -1.9671 | 0.4952 | 0.26 | 0.00 |
| NA                   | 1378262_at   | -4.6345 | -1.9858 | 0.4285 | 0.26 | 0.00 |
| NA                   | 1378233_at   | -5.4303 | -1.9358 | 0.3565 | 0.26 | 0.00 |
| Tnfrsf11b            | 1369407_at   | -4.5991 | -1.9845 | 0.4315 | 0.26 | 0.00 |
| NA                   | 1391544_at   | -3.6477 | -2.1115 | 0.5789 | 0.26 | 0.00 |
| RGD1311155           | 1373970_at   | -4.0474 | -1.9204 | 0.4745 | 0.26 | 0.00 |
| Trim54               | 1372639_at   | -3.5230 | -1.9901 | 0.5649 | 0.26 | 0.00 |
| Frzb                 | 1375961_at   | -4.7040 | -1.9127 | 0.4066 | 0.26 | 0.00 |
| Mamdc2               | 1375983_at   | -4.0099 | -1.9582 | 0.4883 | 0.26 | 0.00 |
| NA                   | 1393528_at   | -4.1676 | -1.9310 | 0.4633 | 0.26 | 0.00 |
| Tmem106a             | 1374948_at   | -4.6760 | -1.9150 | 0.4095 | 0.26 | 0.00 |
| NA                   | 1388935_at   | -4.7930 | -1.9135 | 0.3992 | 0.26 | 0.00 |
| Mylk_predicted       | 1371541_at   | -4.9271 | -1.9160 | 0.3889 | 0.26 | 0.00 |
| LOC686587            | 1388398_at   | -3.8249 | -1.8723 | 0.4895 | 0.26 | 0.00 |
| Lims2                | 1388422_at   | -4.8988 | -1.9208 | 0.3921 | 0.26 | 0.00 |
| NA                   | 1378601_at   | -3.9590 | -1.9258 | 0.4864 | 0.26 | 0.00 |
| Ogn_predicted        | 1376749_at   | -4.1177 | -1.9264 | 0.4678 | 0.26 | 0.00 |
| Tbx15_predicted      | 1383916_at   | -3.6798 | -1.8846 | 0.5122 | 0.26 | 0.00 |
| Id4                  | 1385923_at   | -6.3185 | -1.9291 | 0.3053 | 0.26 | 0.00 |
| Plekhc1              | 1398327_at   | -4.8211 | -1.9150 | 0.3972 | 0.26 | 0.00 |
| NA                   | 1383914_at   | -4.9318 | -1.9155 | 0.3884 | 0.26 | 0.00 |
| Hspb8                | 1387282_at   | -7.3366 | -1.9316 | 0.2633 | 0.26 | 0.00 |
| Id4                  | 1375183_at   | -4.6457 | -1.9158 | 0.4124 | 0.26 | 0.00 |
| NA                   | 1374307_at   | -4.8333 | -1.9316 | 0.3997 | 0.26 | 0.00 |
| Sfrp4                | 1368394_at   | -4.1910 | -1.8702 | 0.4462 | 0.26 | 0.00 |

|                      |              |         |         |        |      |      |
|----------------------|--------------|---------|---------|--------|------|------|
| LOC683263            | 1376736_at   | -4.8608 | -1.9115 | 0.3933 | 0.26 | 0.00 |
| Wnk4                 | 1389662_at   | -3.9930 | -1.8637 | 0.4667 | 0.26 | 0.00 |
| LOC306805            | 1381504_at   | -3.3354 | -1.8948 | 0.5681 | 0.27 | 0.00 |
| S100b                | 1386903_at   | -3.5760 | -1.9027 | 0.5321 | 0.27 | 0.00 |
| RGD1561067_predicted | 1375898_at   | -5.3259 | -1.8889 | 0.3547 | 0.27 | 0.00 |
| NA                   | 1374830_at   | -4.1282 | -1.8957 | 0.4592 | 0.27 | 0.00 |
| Cpd                  | 1386907_at   | -3.5460 | -1.8945 | 0.5343 | 0.27 | 0.00 |
| RGD1561067_predicted | 1372380_at   | -5.1154 | -1.8844 | 0.3684 | 0.27 | 0.00 |
| Aldh1a2              | 1368003_at   | -5.1495 | -1.8875 | 0.3665 | 0.27 | 0.00 |
| RGD1562107_predicted | 1381573_at   | -4.8266 | -1.8837 | 0.3903 | 0.27 | 0.00 |
| Tnfrsf17_predicted   | 1384441_at   | -3.0422 | -1.7586 | 0.5781 | 0.27 | 0.00 |
| Nexn                 | 1370854_at   | -5.3832 | -1.8898 | 0.3511 | 0.27 | 0.00 |
| Tpm1                 | 1370287_a_at | -4.4473 | -1.8821 | 0.4232 | 0.27 | 0.00 |
| Slc39a2_predicted    | 1380356_at   | -4.1476 | -1.9066 | 0.4597 | 0.27 | 0.00 |
| NA                   | 1396405_at   | -4.2720 | -1.9315 | 0.4521 | 0.27 | 0.00 |
| Cdkn1c               | 1372299_at   | -4.4404 | -1.9162 | 0.4315 | 0.27 | 0.00 |
| Frk                  | 1369156_at   | -5.5968 | -1.8927 | 0.3382 | 0.27 | 0.00 |
| Pcdh20_predicted     | 1385229_at   | -3.5411 | -1.9924 | 0.5627 | 0.27 | 0.00 |
| NA                   | 1389649_at   | -3.8024 | -1.9177 | 0.5043 | 0.27 | 0.00 |
| RGD1564875_predicted | 1375982_at   | -5.4665 | -1.8819 | 0.3443 | 0.27 | 0.00 |
| NA                   | 1382098_at   | -2.8695 | -1.9609 | 0.6834 | 0.27 | 0.01 |
| LOC687718            | 1378040_at   | -4.7405 | -1.9282 | 0.4067 | 0.27 | 0.00 |
| Nexn                 | 1382229_at   | -5.2162 | -1.8607 | 0.3567 | 0.27 | 0.00 |
| Myh8                 | 1371053_at   | -3.7580 | -1.9060 | 0.5072 | 0.27 | 0.00 |
| Ap2a1_predicted      | 1371247_at   | -3.3876 | -1.8953 | 0.5595 | 0.27 | 0.00 |
| Tmbim1               | 1372104_at   | -4.5315 | -1.9231 | 0.4244 | 0.27 | 0.00 |
| RGD1305176_predicted | 1398245_at   | -5.0546 | -1.8639 | 0.3687 | 0.27 | 0.00 |
| NA                   | 1380471_at   | -4.0400 | -1.8909 | 0.4680 | 0.27 | 0.00 |
| Igfbp6               | 1372168_s_at | -4.9994 | -1.8805 | 0.3761 | 0.27 | 0.00 |
| NA                   | 1391024_at   | -2.6977 | -2.1157 | 0.7843 | 0.27 | 0.01 |
| Des                  | 1367600_at   | -6.3353 | -1.8697 | 0.2951 | 0.27 | 0.00 |
| Tmprss2              | 1373329_at   | -3.4823 | -1.7934 | 0.5150 | 0.27 | 0.00 |
| RGD1564654_predicted | 1380901_at   | -2.8967 | -2.1435 | 0.7400 | 0.27 | 0.01 |
| Eno2                 | 1370341_at   | -5.1033 | -1.8819 | 0.3687 | 0.27 | 0.00 |
| Slc9a3               | 1387542_at   | -2.7870 | -1.8848 | 0.6763 | 0.27 | 0.01 |
| RGD1562123_predicted | 1393613_at   | -4.5603 | -1.8801 | 0.4123 | 0.27 | 0.00 |
| Pitx2                | 1368785_a_at | -4.8715 | -1.8544 | 0.3807 | 0.28 | 0.00 |
| Chrdl1               | 1393579_at   | -4.4404 | -1.8259 | 0.4112 | 0.28 | 0.00 |
| Tpm1                 | 1370288_a_at | -6.1633 | -1.8486 | 0.2999 | 0.28 | 0.00 |
| RGD1311830_predicted | 1371566_at   | -3.9177 | -1.8393 | 0.4695 | 0.28 | 0.00 |
| Fhl1                 | 1372107_at   | -5.9111 | -1.8268 | 0.3090 | 0.28 | 0.00 |
| LOC687025            | 1374796_at   | -4.6129 | -1.8248 | 0.3956 | 0.28 | 0.00 |
| Fmo1                 | 1387053_at   | -3.6690 | -1.8936 | 0.5161 | 0.28 | 0.00 |
| Neb1_predicted       | 1389532_at   | -2.9434 | -2.0309 | 0.6900 | 0.28 | 0.00 |
| Ddit4l               | 1368013_at   | -3.2893 | -1.8173 | 0.5525 | 0.28 | 0.00 |
| Myl1_v2              | 1370033_at   | -3.4824 | -1.8371 | 0.5276 | 0.28 | 0.00 |
| NA                   | 1380455_at   | -4.1786 | -1.8343 | 0.4390 | 0.28 | 0.00 |
| Ndrp2                | 1387121_a_at | -4.7272 | -1.8513 | 0.3916 | 0.28 | 0.00 |
| NA                   | 1372583_at   | -4.4680 | -1.8296 | 0.4095 | 0.28 | 0.00 |
| Dtna_predicted       | 1380964_at   | -4.2916 | -1.7690 | 0.4122 | 0.28 | 0.00 |
| NA                   | 1391871_at   | -5.0909 | -1.8204 | 0.3576 | 0.28 | 0.00 |
| Ces3                 | 1370363_at   | -2.5837 | -2.2172 | 0.8582 | 0.29 | 0.01 |
| Col4a5_predicted     | 1374705_at   | -3.5257 | -1.7944 | 0.5090 | 0.29 | 0.00 |
| Hey2                 | 1384515_at   | -5.3021 | -1.7997 | 0.3394 | 0.29 | 0.00 |
| LOC688173            | 1371554_at   | -3.1271 | -1.8051 | 0.5773 | 0.29 | 0.00 |

|                      |              |         |         |        |      |      |
|----------------------|--------------|---------|---------|--------|------|------|
| Akr1c18              | 1387958_at   | -2.7619 | -2.1553 | 0.7804 | 0.29 | 0.01 |
| Tceal1               | 1391212_at   | -3.9192 | -1.7727 | 0.4523 | 0.29 | 0.00 |
| Tns                  | 1371954_at   | -4.6951 | -1.7748 | 0.3780 | 0.29 | 0.00 |
| Ube1dc1              | 1396134_at   | -3.5881 | -1.7815 | 0.4965 | 0.29 | 0.00 |
| NA                   | 1378623_at   | -4.0896 | -1.7614 | 0.4307 | 0.29 | 0.00 |
| Hfe2                 | 1391429_at   | -3.7440 | -1.8340 | 0.4898 | 0.29 | 0.00 |
| Atp2a1               | 1368108_at   | -3.1573 | -1.7921 | 0.5676 | 0.29 | 0.00 |
| Aoc3                 | 1372615_at   | -4.5757 | -1.7934 | 0.3919 | 0.29 | 0.00 |
| LOC679942            | 1392832_at   | -3.7075 | -1.8779 | 0.5065 | 0.29 | 0.00 |
| NA                   | 1373873_at   | -4.1836 | -1.8129 | 0.4333 | 0.29 | 0.00 |
| Magi3                | 1398866_at   | -4.7375 | -1.7779 | 0.3753 | 0.29 | 0.00 |
| Smtnl1_predicted     | 1385576_at   | -3.7520 | -1.8059 | 0.4813 | 0.29 | 0.00 |
| NA                   | 1372864_at   | -4.3432 | -1.7461 | 0.4020 | 0.29 | 0.00 |
| NA                   | 1383188_at   | -4.2126 | -1.8068 | 0.4289 | 0.29 | 0.00 |
| Asb2                 | 1372280_at   | -4.7451 | -1.8162 | 0.3827 | 0.29 | 0.00 |
| Acta1                | 1369928_at   | -3.5283 | -1.8303 | 0.5188 | 0.29 | 0.00 |
| Slc6a9               | 1375266_at   | -4.3363 | -1.7911 | 0.4130 | 0.29 | 0.00 |
| C7                   | 1383291_at   | -4.1115 | -1.7562 | 0.4272 | 0.29 | 0.00 |
| LOC681869            | 1395466_at   | -3.2393 | -1.8936 | 0.5846 | 0.29 | 0.00 |
| Calcoco1             | 1370285_at   | -3.9264 | -1.8273 | 0.4654 | 0.29 | 0.00 |
| Pcp4                 | 1368145_at   | -3.3672 | -1.7038 | 0.5060 | 0.29 | 0.00 |
| NA                   | 1388451_at   | -4.0016 | -1.7602 | 0.4399 | 0.29 | 0.00 |
| LOC680866            | 1384195_at   | -3.0569 | -1.9656 | 0.6430 | 0.29 | 0.00 |
| LOC680451            | 1374417_at   | -4.3225 | -1.7616 | 0.4075 | 0.29 | 0.00 |
| LOC361187            | 1378848_at   | -3.2982 | -1.7036 | 0.5165 | 0.29 | 0.00 |
| RGD1560745_predicted | 1393281_at   | -4.1470 | -1.7565 | 0.4236 | 0.29 | 0.00 |
| Pygm                 | 1370982_at   | -3.4848 | -1.7881 | 0.5131 | 0.29 | 0.00 |
| Akap12               | 1368869_at   | -4.3521 | -1.7754 | 0.4079 | 0.29 | 0.00 |
| NA                   | 1373223_at   | -5.5292 | -1.7566 | 0.3177 | 0.30 | 0.00 |
| Tpm1                 | 1379936_at   | -4.4035 | -1.7238 | 0.3915 | 0.30 | 0.00 |
| Myot_predicted       | 1392950_at   | -2.8755 | -1.8213 | 0.6334 | 0.30 | 0.01 |
| LOC678826            | 1375349_at   | -4.2073 | -1.7507 | 0.4161 | 0.30 | 0.00 |
| Ca3                  | 1386977_at   | -3.2511 | -1.7033 | 0.5239 | 0.30 | 0.00 |
| Cyp26b1              | 1376667_at   | -4.8246 | -1.7262 | 0.3578 | 0.30 | 0.00 |
| LOC686098            | 1385177_at   | -4.0618 | -1.7838 | 0.4392 | 0.30 | 0.00 |
| Myl2                 | 1387787_at   | -3.1485 | -1.8058 | 0.5736 | 0.30 | 0.00 |
| Kif21a_predicted     | 1381976_at   | -5.1480 | -1.7661 | 0.3431 | 0.30 | 0.00 |
| Gpr64                | 1382967_at   | -4.0958 | -1.7187 | 0.4196 | 0.30 | 0.00 |
| LOC683529            | 1391139_at   | -4.5744 | -1.7438 | 0.3812 | 0.30 | 0.00 |
| NA                   | 1385701_at   | -4.5754 | -1.7552 | 0.3836 | 0.30 | 0.00 |
| Prss23               | 1373152_at   | -4.0888 | -1.7249 | 0.4219 | 0.30 | 0.00 |
| LOC499814            | 1378324_at   | -3.0444 | -1.9234 | 0.6318 | 0.30 | 0.00 |
| Mybpc2_predicted     | 1373697_at   | -2.8234 | -1.7496 | 0.6197 | 0.30 | 0.01 |
| RGD1307396_predicted | 1397848_at   | -4.5379 | -1.7712 | 0.3903 | 0.30 | 0.00 |
| NA                   | 1380872_at   | -3.9056 | -1.6866 | 0.4318 | 0.30 | 0.00 |
| LOC362774            | 1376174_at   | -3.8881 | -1.7616 | 0.4531 | 0.30 | 0.00 |
| Smpd3                | 1368991_at   | -2.8436 | -1.9064 | 0.6704 | 0.30 | 0.01 |
| LOC361187            | 1391924_at   | -3.0227 | -1.6836 | 0.5570 | 0.30 | 0.00 |
| LOC680229            | 1383766_at   | -4.0010 | -1.7025 | 0.4255 | 0.30 | 0.00 |
| RGD1306952           | 1372372_at   | -3.5656 | -1.7409 | 0.4883 | 0.30 | 0.00 |
| NA                   | 1377423_at   | -3.0576 | -1.8598 | 0.6082 | 0.30 | 0.00 |
| Ldhb                 | 1370218_at   | -4.4054 | -1.7452 | 0.3961 | 0.30 | 0.00 |
| Tpm1                 | 1371241_x_at | -3.0653 | -1.7781 | 0.5801 | 0.30 | 0.00 |
| Adrb3                | 1368780_at   | -3.8807 | -1.7210 | 0.4435 | 0.30 | 0.00 |
| Ndn                  | 1371947_at   | -3.9682 | -1.7534 | 0.4419 | 0.30 | 0.00 |

|                      |              |         |         |        |      |      |
|----------------------|--------------|---------|---------|--------|------|------|
| NA                   | 1372111_at   | -4.1530 | -1.7108 | 0.4119 | 0.30 | 0.00 |
| Hspa2                | 1369841_at   | -3.2319 | -1.7138 | 0.5303 | 0.31 | 0.00 |
| Pdzn3_predicted      | 1373748_at   | -4.4009 | -1.6824 | 0.3823 | 0.31 | 0.00 |
| NA                   | 1376074_at   | -3.8829 | -1.6626 | 0.4282 | 0.31 | 0.00 |
| Bdnf                 | 1368677_at   | -3.3273 | -1.6468 | 0.4949 | 0.31 | 0.00 |
| Cfl2_predicted       | 1388928_at   | -5.1422 | -1.6849 | 0.3277 | 0.31 | 0.00 |
| NA                   | 1381575_at   | -3.0561 | -1.7729 | 0.5801 | 0.31 | 0.00 |
| LOC684425            | 1374677_at   | -3.1625 | -1.6771 | 0.5303 | 0.31 | 0.00 |
| Tmod1                | 1387370_at   | -3.9905 | -1.6769 | 0.4202 | 0.31 | 0.00 |
| NA                   | 1373312_at   | -3.9890 | -1.6746 | 0.4198 | 0.31 | 0.00 |
| Hoxc5_predicted      | 1393876_at   | -4.3209 | -1.6927 | 0.3917 | 0.31 | 0.00 |
| NA                   | 1374121_at   | -4.2634 | -1.6740 | 0.3926 | 0.31 | 0.00 |
| Ttn                  | 1375518_at   | -2.8845 | -1.7655 | 0.6121 | 0.31 | 0.01 |
| RGD1560155_predicted | 1377884_at   | -4.1159 | -1.6570 | 0.4026 | 0.31 | 0.00 |
| Clu                  | 1388246_at   | -4.1878 | -1.7133 | 0.4091 | 0.31 | 0.00 |
| NA                   | 1374935_at   | -4.5355 | -1.6853 | 0.3716 | 0.31 | 0.00 |
| LOC362994            | 1374768_at   | -3.9187 | -1.6484 | 0.4207 | 0.31 | 0.00 |
| Ilf1_predicted       | 1377659_at   | -3.3571 | -1.6445 | 0.4899 | 0.31 | 0.00 |
| St5_predicted        | 1373288_at   | -4.5493 | -1.6558 | 0.3640 | 0.31 | 0.00 |
| Rptn_predicted       | 1377775_at   | -1.8209 | -2.4181 | 1.3280 | 0.31 | 0.03 |
| NA                   | 1373082_at   | -3.9895 | -1.6473 | 0.4129 | 0.31 | 0.00 |
| NA                   | 1388452_at   | -4.0309 | -1.6641 | 0.4128 | 0.31 | 0.00 |
| NA                   | 1372745_at   | -3.1909 | -1.6734 | 0.5244 | 0.31 | 0.00 |
| Myom1                | 1374895_at   | -3.2619 | -1.7341 | 0.5316 | 0.31 | 0.00 |
| C7                   | 1388557_at   | -3.3970 | -1.6879 | 0.4969 | 0.31 | 0.00 |
| Tpm1                 | 1368724_a_at | -3.0224 | -1.7239 | 0.5704 | 0.31 | 0.00 |
| NA                   | 1393437_at   | -4.4803 | -1.6572 | 0.3699 | 0.32 | 0.00 |
| Phex                 | 1369719_at   | -3.9631 | -1.6727 | 0.4221 | 0.32 | 0.00 |
| RGD1308297           | 1373920_at   | -3.5713 | -1.6328 | 0.4572 | 0.32 | 0.00 |
| Dnah1                | 1381039_at   | -2.4742 | -1.9772 | 0.7991 | 0.32 | 0.01 |
| Rpl3l_predicted      | 1376884_a_at | -2.9139 | -1.6722 | 0.5739 | 0.32 | 0.01 |
| LOC690661            | 1377655_at   | -3.9168 | -1.6308 | 0.4164 | 0.32 | 0.00 |
| NA                   | 1382835_at   | -3.8874 | -1.6831 | 0.4330 | 0.32 | 0.00 |
| LOC680021            | 1373337_at   | -3.7746 | -1.7089 | 0.4527 | 0.32 | 0.00 |
| LnX1_predicted       | 1385497_x_at | -3.9863 | -1.6530 | 0.4147 | 0.32 | 0.00 |
| NA                   | 1392126_at   | -3.7304 | -1.6462 | 0.4413 | 0.32 | 0.00 |
| Mustn1               | 1373032_at   | -4.2501 | -1.6182 | 0.3807 | 0.32 | 0.00 |
| Tnni2                | 1367964_at   | -2.9031 | -1.6460 | 0.5670 | 0.32 | 0.01 |
| NA                   | 1392840_at   | -4.2532 | -1.6561 | 0.3894 | 0.32 | 0.00 |
| RGD1307396_predicted | 1376645_at   | -3.8307 | -1.6543 | 0.4319 | 0.32 | 0.00 |
| Nkx6-1               | 1368998_at   | -4.8144 | -1.6287 | 0.3383 | 0.32 | 0.00 |
| Ccl11                | 1387319_at   | -3.0129 | -1.7115 | 0.5681 | 0.32 | 0.00 |
| RGD1562234_predicted | 1373276_at   | -2.2589 | -3.1586 | 1.3983 | 0.32 | 0.01 |
| Capn3                | 1369375_a_at | -3.7030 | -1.6015 | 0.4325 | 0.32 | 0.00 |
| Itga11_predicted     | 1394824_at   | -4.3897 | -1.6440 | 0.3745 | 0.32 | 0.00 |
| NA                   | 1384310_at   | -4.1333 | -1.6167 | 0.3911 | 0.32 | 0.00 |
| Nope_predicted       | 1373839_at   | -3.6730 | -1.6088 | 0.4380 | 0.32 | 0.00 |
| Gpsm1                | 1372383_at   | -3.0040 | -1.7679 | 0.5885 | 0.32 | 0.00 |
| NA                   | 1397559_at   | -3.3301 | -1.5851 | 0.4760 | 0.32 | 0.00 |
| Dhtkd1               | 1390172_at   | -4.0911 | -1.6345 | 0.3995 | 0.32 | 0.00 |
| Adamts1              | 1368223_at   | -3.4286 | -1.6407 | 0.4785 | 0.32 | 0.00 |
| Plce1                | 1368980_at   | -3.4362 | -1.5770 | 0.4589 | 0.32 | 0.00 |
| Osr2                 | 1380133_at   | -4.5308 | -1.6251 | 0.3587 | 0.32 | 0.00 |
| NA                   | 1395052_at   | -4.0145 | -1.6079 | 0.4005 | 0.32 | 0.00 |
| Kbtbd10              | 1368252_at   | -2.8475 | -1.7121 | 0.6013 | 0.33 | 0.01 |

|                      |              |         |         |        |      |      |
|----------------------|--------------|---------|---------|--------|------|------|
| LOC306805            | 1380726_at   | -3.7003 | -1.5851 | 0.4284 | 0.33 | 0.00 |
| NA                   | 1391071_at   | -3.9607 | -1.6107 | 0.4067 | 0.33 | 0.00 |
| Aox1                 | 1387376_at   | -3.8311 | -1.6262 | 0.4245 | 0.33 | 0.00 |
| Prrx2_predicted      | 1374477_at   | -3.8868 | -1.6386 | 0.4216 | 0.33 | 0.00 |
| Ecm1                 | 1388698_at   | -4.1231 | -1.6343 | 0.3964 | 0.33 | 0.00 |
| P2rx2                | 1369474_a_at | -2.7520 | -1.4913 | 0.5419 | 0.33 | 0.01 |
| Serpinb7             | 1375101_at   | -3.4703 | -1.6766 | 0.4831 | 0.33 | 0.00 |
| Gap43                | 1367930_at   | -3.5540 | -1.6052 | 0.4517 | 0.33 | 0.00 |
| Smyd1_predicted      | 1380146_at   | -2.8557 | -1.6130 | 0.5648 | 0.33 | 0.01 |
| NA                   | 1397554_at   | -3.9268 | -1.6012 | 0.4078 | 0.33 | 0.00 |
| Ubl3                 | 1374413_at   | -4.0622 | -1.6198 | 0.3987 | 0.33 | 0.00 |
| NA                   | 1379358_at   | -3.7748 | -1.5999 | 0.4238 | 0.33 | 0.00 |
| NA                   | 1371775_at   | -2.7130 | -1.7147 | 0.6320 | 0.33 | 0.01 |
| NA                   | 1390339_at   | -3.4779 | -1.6288 | 0.4683 | 0.33 | 0.00 |
| NA                   | 1377818_at   | -4.5213 | -1.6213 | 0.3586 | 0.33 | 0.00 |
| NA                   | 1398620_at   | -4.3405 | -1.6031 | 0.3693 | 0.33 | 0.00 |
| NA                   | 1392034_at   | -3.9681 | -1.5760 | 0.3972 | 0.33 | 0.00 |
| NA                   | 1378111_at   | -3.6401 | -1.5470 | 0.4250 | 0.33 | 0.00 |
| LOC502020            | 1393177_at   | -4.0021 | -1.6428 | 0.4105 | 0.33 | 0.00 |
| NA                   | 1389310_at   | -4.1269 | -1.5712 | 0.3807 | 0.33 | 0.00 |
| NA                   | 1383976_at   | -3.7857 | -1.5862 | 0.4190 | 0.33 | 0.00 |
| RGD1564875_predicted | 1372737_at   | -3.4933 | -1.5554 | 0.4453 | 0.33 | 0.00 |
| RGD1564875_predicted | 1375303_at   | -3.6429 | -1.6100 | 0.4420 | 0.33 | 0.00 |
| NA                   | 1385845_at   | -4.1604 | -1.5801 | 0.3798 | 0.33 | 0.00 |
| Gnai1                | 1387505_at   | -4.0436 | -1.6230 | 0.4014 | 0.33 | 0.00 |
| P2ry14               | 1370449_at   | -3.9921 | -1.5706 | 0.3934 | 0.33 | 0.00 |
| NA                   | 1381080_at   | -3.7646 | -1.5826 | 0.4204 | 0.33 | 0.00 |
| Plac9_predicted      | 1384558_at   | -3.9011 | -1.5841 | 0.4061 | 0.33 | 0.00 |
| Slc6a4               | 1368348_at   | -4.1090 | -1.5775 | 0.3839 | 0.33 | 0.00 |
| Klf15                | 1368249_at   | -3.9743 | -1.6267 | 0.4093 | 0.33 | 0.00 |
| Hdac11_predicted     | 1374954_at   | -4.0320 | -1.6122 | 0.3999 | 0.33 | 0.00 |
| NA                   | 1396455_at   | -4.0052 | -1.5994 | 0.3993 | 0.33 | 0.00 |
| NA                   | 1373684_at   | -3.3140 | -1.6000 | 0.4828 | 0.33 | 0.00 |
| RGD1563869_predicted | 1376465_at   | -4.2364 | -1.6008 | 0.3779 | 0.33 | 0.00 |
| NA                   | 1371679_at   | -4.1676 | -1.5918 | 0.3819 | 0.34 | 0.00 |
| Serpinb7             | 1369547_at   | -3.1668 | -1.6513 | 0.5214 | 0.34 | 0.00 |
| Cap2                 | 1368894_at   | -4.2889 | -1.5932 | 0.3715 | 0.34 | 0.00 |
| S100a1               | 1388456_at   | -4.6040 | -1.5683 | 0.3406 | 0.34 | 0.00 |
| Abat                 | 1369799_at   | -2.4842 | -1.6229 | 0.6533 | 0.34 | 0.01 |
| Tlcd1                | 1391559_at   | -3.1326 | -1.6549 | 0.5283 | 0.34 | 0.00 |
| Pi16_predicted       | 1372640_at   | -5.7527 | -1.5697 | 0.2729 | 0.34 | 0.00 |
| Sgce                 | 1389971_at   | -4.2742 | -1.5582 | 0.3646 | 0.34 | 0.00 |
| Acta2                | 1370857_at   | -3.6776 | -1.5279 | 0.4155 | 0.34 | 0.00 |
| Rassf8_predicted     | 1373624_at   | -4.0750 | -1.5412 | 0.3782 | 0.34 | 0.00 |
| Gpld1                | 1380833_at   | -2.9180 | -1.6903 | 0.5793 | 0.34 | 0.00 |
| Bmp6                 | 1388201_at   | -5.2512 | -1.5622 | 0.2975 | 0.34 | 0.00 |
| Timp2                | 1386940_at   | -4.9779 | -1.5649 | 0.3144 | 0.34 | 0.00 |
| Aldh1a1              | 1387022_at   | -4.5328 | -1.5697 | 0.3463 | 0.34 | 0.00 |
| Map1b                | 1373363_at   | -4.1987 | -1.5387 | 0.3665 | 0.34 | 0.00 |
| Aldh3a1              | 1368130_at   | -3.8015 | -1.5990 | 0.4206 | 0.34 | 0.00 |
| Ryr2                 | 1382088_at   | -3.8850 | -1.5397 | 0.3963 | 0.34 | 0.00 |
| NA                   | 1383061_at   | -2.9465 | -1.6578 | 0.5626 | 0.34 | 0.00 |
| Dhrs7c_predicted     | 1389079_at   | -3.0621 | -1.5173 | 0.4955 | 0.34 | 0.00 |
| RGD1307284_predicted | 1398458_at   | -4.8014 | -1.5501 | 0.3228 | 0.34 | 0.00 |
| NA                   | 1380850_at   | -3.1145 | -1.6094 | 0.5168 | 0.34 | 0.00 |



|                      |              |         |         |        |      |      |
|----------------------|--------------|---------|---------|--------|------|------|
| NA                   | 1378414_at   | -2.9969 | -1.6578 | 0.5532 | 0.34 | 0.00 |
| Mcam                 | 1374933_at   | -3.4706 | -1.5138 | 0.4362 | 0.34 | 0.00 |
| NA                   | 1391444_at   | -5.2889 | -1.5297 | 0.2892 | 0.34 | 0.00 |
| NA                   | 1378082_at   | -2.8111 | -1.6038 | 0.5705 | 0.34 | 0.01 |
| Tnxa                 | 1388145_at   | -6.0000 | -1.5393 | 0.2565 | 0.34 | 0.00 |
| RGD1561041_predicted | 1382185_at   | -3.6561 | -1.5561 | 0.4256 | 0.34 | 0.00 |
| Plcl1                | 1368700_at   | -3.3215 | -1.5756 | 0.4744 | 0.35 | 0.00 |
| Gkap1                | 1383059_a_at | -3.8763 | -1.5376 | 0.3967 | 0.35 | 0.00 |
| LOC681309            | 1390878_at   | -4.5168 | -1.5336 | 0.3395 | 0.35 | 0.00 |
| RGD1561064_predicted | 1376227_at   | -2.8239 | -1.5588 | 0.5520 | 0.35 | 0.01 |
| Msln                 | 1368441_at   | -3.8787 | -1.5274 | 0.3938 | 0.35 | 0.00 |
| LOC246295            | 1371933_at   | -2.9755 | -1.6046 | 0.5393 | 0.35 | 0.00 |
| NA                   | 1375856_at   | -2.4023 | -1.5913 | 0.6624 | 0.35 | 0.01 |
| RGD1305645_predicted | 1372646_at   | -2.6592 | -1.4680 | 0.5520 | 0.35 | 0.01 |
| NA                   | 1383460_at   | -5.3165 | -1.5281 | 0.2874 | 0.35 | 0.00 |
| Sema3b_predicted     | 1377336_at   | -4.3963 | -1.5033 | 0.3420 | 0.35 | 0.00 |
| NA                   | 1388825_at   | -4.4308 | -1.5145 | 0.3418 | 0.35 | 0.00 |
| NA                   | 1385053_at   | -3.8437 | -1.5263 | 0.3971 | 0.35 | 0.00 |
| NA                   | 1371746_at   | -3.2794 | -1.5220 | 0.4641 | 0.35 | 0.00 |
| Cav                  | 1370131_at   | -3.3458 | -1.5492 | 0.4630 | 0.35 | 0.00 |
| NA                   | 1373651_at   | -4.1922 | -1.5186 | 0.3622 | 0.35 | 0.00 |
| Fndc1                | 1374726_at   | -4.6058 | -1.5270 | 0.3315 | 0.35 | 0.00 |
| NA                   | 1372159_at   | -4.5956 | -1.4931 | 0.3249 | 0.35 | 0.00 |
| Rbm24_predicted      | 1377788_at   | -4.8388 | -1.5112 | 0.3123 | 0.35 | 0.00 |
| Klhl23_predicted     | 1383433_at   | -3.8461 | -1.4885 | 0.3870 | 0.35 | 0.00 |
| LOC691923            | 1391707_at   | -3.8001 | -1.5344 | 0.4038 | 0.35 | 0.00 |
| NA                   | 1373996_at   | -3.3858 | -1.5671 | 0.4628 | 0.35 | 0.00 |
| Aldh3a2              | 1368365_at   | -4.6433 | -1.5053 | 0.3242 | 0.35 | 0.00 |
| Geft                 | 1372967_at   | -4.4664 | -1.4915 | 0.3339 | 0.35 | 0.00 |
| NA                   | 1378146_at   | -4.0515 | -1.4820 | 0.3658 | 0.35 | 0.00 |
| Gata4                | 1369960_at   | -6.3519 | -1.5011 | 0.2363 | 0.35 | 0.00 |
| Nr2f1                | 1387571_at   | -3.0764 | -1.4699 | 0.4778 | 0.35 | 0.00 |
| Bphl                 | 1388617_at   | -2.8715 | -1.4897 | 0.5188 | 0.35 | 0.01 |
| Gpc3                 | 1368395_at   | -3.2444 | -1.5845 | 0.4884 | 0.35 | 0.00 |
| Rnf167               | 1399065_at   | -3.9728 | -1.4680 | 0.3695 | 0.35 | 0.00 |
| NA                   | 1393356_at   | -3.9184 | -1.4688 | 0.3748 | 0.35 | 0.00 |
| NA                   | 1378074_at   | -3.3707 | -1.5431 | 0.4578 | 0.35 | 0.00 |
| NA                   | 1377266_at   | -3.0043 | -1.6176 | 0.5384 | 0.35 | 0.00 |
| RGD1309808_predicted | 1372604_at   | -3.3354 | -1.4957 | 0.4484 | 0.35 | 0.00 |
| Cmklr1               | 1383304_at   | -3.9741 | -1.4940 | 0.3759 | 0.35 | 0.00 |
| Sntg2_predicted      | 1385325_at   | -2.8618 | -1.4040 | 0.4906 | 0.36 | 0.01 |
| Ckb                  | 1367740_at   | -4.2632 | -1.4792 | 0.3470 | 0.36 | 0.00 |
| Sema6d_predicted     | 1381968_at   | -3.5055 | -1.5002 | 0.4279 | 0.36 | 0.00 |
| Tmod1                | 1388718_at   | -4.1589 | -1.4845 | 0.3569 | 0.36 | 0.00 |
| Lrrc28_predicted     | 1375419_at   | -4.2015 | -1.4709 | 0.3501 | 0.36 | 0.00 |
| Atp1a2               | 1386911_at   | -3.5138 | -1.5283 | 0.4350 | 0.36 | 0.00 |
| Pik3r1               | 1376296_at   | -4.3042 | -1.5066 | 0.3500 | 0.36 | 0.00 |
| Efemp1               | 1390112_at   | -3.6645 | -1.5118 | 0.4126 | 0.36 | 0.00 |
| RGD1307396_predicted | 1395765_at   | -3.6680 | -1.5033 | 0.4098 | 0.36 | 0.00 |
| Ptger3               | 1376977_at   | -3.9525 | -1.5185 | 0.3842 | 0.36 | 0.00 |
| Sparcl1              | 1386865_at   | -3.8410 | -1.4560 | 0.3791 | 0.36 | 0.00 |
| NA                   | 1385008_at   | -3.4142 | -1.4666 | 0.4295 | 0.36 | 0.00 |
| NA                   | 1372856_at   | -4.8910 | -1.4725 | 0.3011 | 0.36 | 0.00 |
| Gpm6a                | 1373773_at   | -3.3699 | -1.5328 | 0.4548 | 0.36 | 0.00 |
| NA                   | 1396426_at   | -2.5969 | -1.5341 | 0.5907 | 0.36 | 0.01 |

|                      |              |         |         |        |      |      |
|----------------------|--------------|---------|---------|--------|------|------|
| Tnnc2                | 1372195_at   | -2.6767 | -1.5438 | 0.5768 | 0.36 | 0.01 |
| NA                   | 1392893_a_at | -3.2521 | -1.4810 | 0.4554 | 0.36 | 0.00 |
| Trp53inp2            | 1375517_at   | -3.3242 | -1.5347 | 0.4617 | 0.36 | 0.00 |
| Sdc2                 | 1382189_at   | -3.2920 | -1.4673 | 0.4457 | 0.36 | 0.00 |
| Tbx5                 | 1377139_at   | -4.0775 | -1.4682 | 0.3601 | 0.36 | 0.00 |
| NA                   | 1372647_at   | -4.8447 | -1.4634 | 0.3021 | 0.36 | 0.00 |
| NA                   | 1373172_at   | -4.3730 | -1.4830 | 0.3391 | 0.36 | 0.00 |
| Cd151                | 1389306_at   | -3.6437 | -1.4603 | 0.4008 | 0.36 | 0.00 |
| LOC691995            | 1388598_at   | -3.3534 | -1.4964 | 0.4462 | 0.36 | 0.00 |
| NA                   | 1374089_at   | -3.4004 | -1.4475 | 0.4257 | 0.36 | 0.00 |
| Postn_predicted      | 1373911_at   | -2.6984 | -1.4667 | 0.5435 | 0.36 | 0.01 |
| Cd248_predicted      | 1389490_at   | -3.2115 | -1.4526 | 0.4523 | 0.36 | 0.00 |
| Gabarap              | 1392976_at   | -2.7437 | -1.4871 | 0.5420 | 0.36 | 0.01 |
| Mrc2_predicted       | 1382659_at   | -2.7352 | -1.4453 | 0.5284 | 0.36 | 0.01 |
| Hrc                  | 1377499_a_at | -3.2959 | -1.4674 | 0.4452 | 0.36 | 0.00 |
| RGD1564253_predicted | 1394459_at   | -4.7901 | -1.4552 | 0.3038 | 0.36 | 0.00 |
| Casq2                | 1368988_at   | -2.6145 | -1.3693 | 0.5237 | 0.36 | 0.01 |
| NA                   | 1378156_at   | -4.3002 | -1.4628 | 0.3402 | 0.36 | 0.00 |
| Tgfb1i1              | 1370887_at   | -3.9206 | -1.4247 | 0.3634 | 0.37 | 0.00 |
| Il11ra1              | 1370331_at   | -4.2392 | -1.4503 | 0.3421 | 0.37 | 0.00 |
| Dpep1                | 1368282_at   | -2.5850 | -1.4497 | 0.5608 | 0.37 | 0.01 |
| Osbp1a               | 1383633_at   | -3.1951 | -1.5243 | 0.4771 | 0.37 | 0.00 |
| NA                   | 1397225_at   | -3.0105 | -1.5335 | 0.5094 | 0.37 | 0.00 |
| Pfkm                 | 1367864_at   | -3.4118 | -1.4652 | 0.4295 | 0.37 | 0.00 |
| Sdpr                 | 1375638_at   | -3.6076 | -1.4536 | 0.4029 | 0.37 | 0.00 |
| RGD1564436_predicted | 1382940_at   | -4.3955 | -1.4474 | 0.3293 | 0.37 | 0.00 |
| NA                   | 1391331_at   | -2.6688 | -1.5941 | 0.5973 | 0.37 | 0.01 |
| NA                   | 1389554_at   | -3.4221 | -1.4759 | 0.4313 | 0.37 | 0.00 |
| RGD1306911_predicted | 1389449_at   | -2.5726 | -1.4589 | 0.5671 | 0.37 | 0.01 |
| Pmp22                | 1370247_a_at | -3.7856 | -1.4389 | 0.3801 | 0.37 | 0.00 |
| NA                   | 1380465_at   | -4.7674 | -1.4404 | 0.3021 | 0.37 | 0.00 |
| NA                   | 1392587_at   | -4.3912 | -1.4426 | 0.3285 | 0.37 | 0.00 |
| Mybph                | 1368966_at   | -2.6601 | -1.3717 | 0.5157 | 0.37 | 0.01 |
| Hspb7                | 1372649_at   | -3.7280 | -1.4598 | 0.3916 | 0.37 | 0.00 |
| NA                   | 1378292_at   | -2.1613 | -1.5694 | 0.7261 | 0.37 | 0.02 |
| Ampd1                | 1398306_at   | -3.0738 | -1.4201 | 0.4620 | 0.37 | 0.00 |
| Cyp4f6               | 1387916_at   | -3.4424 | -1.4157 | 0.4113 | 0.37 | 0.00 |
| LOC681858            | 1374056_at   | -3.6467 | -1.4373 | 0.3941 | 0.37 | 0.00 |
| NA                   | 1394290_at   | -3.1338 | -1.4604 | 0.4660 | 0.37 | 0.00 |
| NA                   | 1384707_at   | -2.9887 | -1.4906 | 0.4987 | 0.37 | 0.00 |
| RGD1564935_predicted | 1381219_at   | -2.9287 | -1.3863 | 0.4733 | 0.37 | 0.00 |
| NA                   | 1397452_at   | -2.8983 | -1.3801 | 0.4762 | 0.37 | 0.01 |
| Sfrp2                | 1390119_at   | -2.9678 | -1.4231 | 0.4795 | 0.37 | 0.00 |
| NA                   | 1371969_at   | -3.3532 | -1.4110 | 0.4208 | 0.37 | 0.00 |
| RGD1564108_predicted | 1385038_at   | -2.4407 | -1.3575 | 0.5562 | 0.37 | 0.01 |
| NA                   | 1381269_at   | -3.2433 | -1.3738 | 0.4236 | 0.37 | 0.00 |
| LOC687536            | 1383488_at   | -4.2521 | -1.4166 | 0.3331 | 0.37 | 0.00 |
| Cgn_predicted        | 1384143_at   | -3.3010 | -1.4822 | 0.4490 | 0.37 | 0.00 |
| LOC312863            | 1372858_at   | -2.8260 | -1.3804 | 0.4885 | 0.37 | 0.01 |
| NA                   | 1384250_a_at | -3.3134 | -1.3884 | 0.4190 | 0.37 | 0.00 |
| Aebp1_predicted      | 1372301_at   | -3.9131 | -1.4234 | 0.3638 | 0.37 | 0.00 |
| Per2                 | 1368303_at   | -3.6230 | -1.4579 | 0.4024 | 0.37 | 0.00 |
| Calm4_predicted      | 1373317_at   | -2.8129 | -1.5326 | 0.5448 | 0.37 | 0.01 |
| Igfbp5               | 1370960_at   | -2.8989 | -1.5520 | 0.5354 | 0.37 | 0.01 |
| NA                   | 1390240_at   | -2.9848 | -1.4562 | 0.4879 | 0.37 | 0.00 |

|                      |              |         |         |        |      |      |
|----------------------|--------------|---------|---------|--------|------|------|
| LOC678910            | 1383713_at   | -3.3714 | -1.4532 | 0.4310 | 0.37 | 0.00 |
| LOC686590            | 1389540_at   | -5.2237 | -1.4138 | 0.2706 | 0.38 | 0.00 |
| RGD1565927_predicted | 1376937_at   | -3.3980 | -1.3803 | 0.4062 | 0.38 | 0.00 |
| Adamtsl4             | 1372426_at   | -4.3326 | -1.4305 | 0.3302 | 0.38 | 0.00 |
| Epdr2                | 1375855_at   | -3.2379 | -1.3925 | 0.4301 | 0.38 | 0.00 |
| NA                   | 1383565_at   | -3.0529 | -1.5120 | 0.4953 | 0.38 | 0.00 |
| LOC682946            | 1373963_at   | -4.0383 | -1.4213 | 0.3520 | 0.38 | 0.00 |
| Sdc2                 | 1370166_at   | -3.4610 | -1.4003 | 0.4046 | 0.38 | 0.00 |
| Cyp1a1               | 1370269_at   | -2.3991 | -1.4394 | 0.6000 | 0.38 | 0.01 |
| Lama2_predicted      | 1390404_at   | -3.5186 | -1.3964 | 0.3968 | 0.38 | 0.00 |
| Slc16a7              | 1370609_a_at | -2.7997 | -1.4690 | 0.5247 | 0.38 | 0.01 |
| NA                   | 1373908_at   | -3.4071 | -1.3768 | 0.4041 | 0.38 | 0.00 |
| NA                   | 1372681_at   | -3.3737 | -1.4056 | 0.4166 | 0.38 | 0.00 |
| RGD1564779_predicted | 1384160_at   | -4.2242 | -1.4053 | 0.3327 | 0.38 | 0.00 |
| Tnfrsf17_predicted   | 1385710_at   | -1.7240 | -1.1751 | 0.6816 | 0.38 | 0.04 |
| Olfml3_predicted     | 1371924_at   | -2.9170 | -1.4220 | 0.4875 | 0.38 | 0.00 |
| Prkcz                | 1370197_a_at | -4.4503 | -1.4031 | 0.3153 | 0.38 | 0.00 |
| NA                   | 1379336_at   | -2.9537 | -1.4880 | 0.5038 | 0.38 | 0.00 |
| NA                   | 1394455_at   | -3.2226 | -1.3769 | 0.4273 | 0.38 | 0.00 |
| Kcnd3                | 1369144_a_at | -2.6149 | -1.3964 | 0.5340 | 0.38 | 0.01 |
| Mrgprf               | 1382190_at   | -3.4652 | -1.4141 | 0.4081 | 0.38 | 0.00 |
| NA                   | 1392364_at   | -2.6920 | -1.5094 | 0.5607 | 0.38 | 0.01 |
| Tm4sf2               | 1371702_at   | -3.7817 | -1.4231 | 0.3763 | 0.38 | 0.00 |
| Casq2                | 1387401_at   | -2.7725 | -1.3237 | 0.4775 | 0.38 | 0.01 |
| Mic211               | 1368528_at   | -2.8807 | -1.4430 | 0.5009 | 0.38 | 0.01 |
| NA                   | 1378809_at   | -3.5434 | -1.4037 | 0.3961 | 0.38 | 0.00 |
| Nck2_predicted       | 1398441_at   | -4.0558 | -1.3996 | 0.3451 | 0.38 | 0.00 |
| Lgals1               | 1367628_at   | -2.6442 | -1.4780 | 0.5590 | 0.38 | 0.01 |
| NA                   | 1382914_at   | -3.9940 | -1.3887 | 0.3477 | 0.38 | 0.00 |
| Asph_predicted       | 1379884_at   | -2.9587 | -1.3880 | 0.4691 | 0.38 | 0.00 |
| NA                   | 1389281_at   | -3.6065 | -1.3670 | 0.3790 | 0.38 | 0.00 |
| NA                   | 1397678_at   | -2.9741 | -1.3912 | 0.4678 | 0.38 | 0.00 |
| NA                   | 1374709_at   | -4.1119 | -1.3822 | 0.3361 | 0.38 | 0.00 |
| Ank2                 | 1373351_at   | -3.1706 | -1.4022 | 0.4423 | 0.38 | 0.00 |
| Kif3c                | 1369637_at   | -4.6307 | -1.3814 | 0.2983 | 0.38 | 0.00 |
| NA                   | 1386552_at   | -3.2601 | -1.3460 | 0.4129 | 0.38 | 0.00 |
| NA                   | 1374012_at   | -3.9722 | -1.3701 | 0.3449 | 0.38 | 0.00 |
| NA                   | 1374685_at   | -3.6412 | -1.3762 | 0.3780 | 0.38 | 0.00 |
| RGD1563612_predicted | 1389679_at   | -3.2243 | -1.3586 | 0.4214 | 0.38 | 0.00 |
| Cpa6_predicted       | 1384454_at   | -4.5709 | -1.3784 | 0.3016 | 0.38 | 0.00 |
| Itgb1bp2_predicted   | 1388961_at   | -3.4215 | -1.3541 | 0.3958 | 0.38 | 0.00 |
| C1qtnf7_predicted    | 1393632_at   | -3.6109 | -1.3692 | 0.3792 | 0.38 | 0.00 |
| Zfp692_predicted     | 1379342_at   | -3.6763 | -1.3971 | 0.3800 | 0.38 | 0.00 |
| Kif7_predicted       | 1393447_at   | -3.5996 | -1.3583 | 0.3773 | 0.39 | 0.00 |
| Cox6a2               | 1367782_at   | -2.1324 | -1.4333 | 0.6722 | 0.39 | 0.02 |
| LOC368066            | 1373975_at   | -1.6893 | -1.2068 | 0.7144 | 0.39 | 0.04 |
| Pcsk5                | 1393467_at   | -3.0983 | -1.3464 | 0.4346 | 0.39 | 0.00 |
| NA                   | 1376734_at   | -3.1902 | -1.3348 | 0.4184 | 0.39 | 0.00 |
| NA                   | 1373158_at   | -3.0980 | -1.4191 | 0.4581 | 0.39 | 0.00 |
| Magi3                | 1387753_s_at | -3.9144 | -1.3577 | 0.3468 | 0.39 | 0.00 |
| NA                   | 1380209_at   | -2.7484 | -1.4903 | 0.5422 | 0.39 | 0.01 |
| Phyh                 | 1387271_at   | -4.0783 | -1.3644 | 0.3346 | 0.39 | 0.00 |
| Neb_predicted        | 1394666_at   | -2.4336 | -1.3593 | 0.5585 | 0.39 | 0.01 |
| Fez1                 | 1367918_at   | -3.0196 | -1.3834 | 0.4581 | 0.39 | 0.00 |
| Kcns3                | 1368751_at   | -3.8522 | -1.3782 | 0.3578 | 0.39 | 0.00 |

|                      |            |         |         |        |      |      |
|----------------------|------------|---------|---------|--------|------|------|
| Smarcd3              | 1371665_at | -3.7682 | -1.3767 | 0.3653 | 0.39 | 0.00 |
| RGD1309610_predicted | 1379193_at | -3.9006 | -1.3602 | 0.3487 | 0.39 | 0.00 |
| Six1                 | 1374904_at | -3.0061 | -1.4223 | 0.4731 | 0.39 | 0.00 |
| Plcb4                | 1386962_at | -3.8807 | -1.3478 | 0.3473 | 0.39 | 0.00 |
| NA                   | 1394020_at | -3.3034 | -1.3740 | 0.4159 | 0.39 | 0.00 |
| NA                   | 1377086_at | -2.1439 | -1.2592 | 0.5873 | 0.39 | 0.02 |
| Col1a2               | 1387854_at | -2.3318 | -1.3419 | 0.5755 | 0.39 | 0.01 |
| NA                   | 1393743_at | -3.7999 | -1.3860 | 0.3648 | 0.39 | 0.00 |
| Cd52                 | 1368338_at | -2.7494 | -1.4075 | 0.5119 | 0.39 | 0.01 |
| Aoc3                 | 1394838_at | -3.7026 | -1.3757 | 0.3715 | 0.39 | 0.00 |
| Myoz2_predicted      | 1371801_at | -2.1907 | -1.4915 | 0.6809 | 0.39 | 0.01 |
| Pcdh20_predicted     | 1391208_at | -4.2655 | -1.3556 | 0.3178 | 0.39 | 0.00 |
| MGC108776            | 1390944_at | -3.1482 | -1.4113 | 0.4483 | 0.39 | 0.00 |
| Ca3                  | 1367896_at | -3.3150 | -1.3722 | 0.4139 | 0.39 | 0.00 |
| Adh1                 | 1378260_at | -3.5908 | -1.3684 | 0.3811 | 0.39 | 0.00 |
| NA                   | 1377767_at | -3.3863 | -1.3522 | 0.3993 | 0.39 | 0.00 |
| Ddr2                 | 1389423_at | -3.5081 | -1.3502 | 0.3849 | 0.39 | 0.00 |
| NA                   | 1391617_at | -2.7831 | -1.2769 | 0.4588 | 0.39 | 0.01 |
| Ryr1                 | 1390355_at | -2.6764 | -1.3965 | 0.5218 | 0.39 | 0.01 |
| NA                   | 1390301_at | -3.5327 | -1.3589 | 0.3847 | 0.39 | 0.00 |
| Cacna2d1             | 1369649_at | -4.4860 | -1.3503 | 0.3010 | 0.39 | 0.00 |
| LOC683555            | 1388741_at | -2.1333 | -1.4835 | 0.6954 | 0.39 | 0.02 |
| NA                   | 1379277_at | -4.2834 | -1.3432 | 0.3136 | 0.39 | 0.00 |
| 3                    | 1384285_at | -2.8300 | -1.3750 | 0.4858 | 0.39 | 0.01 |
| NA                   | 1376371_at | -2.0445 | -1.5819 | 0.7737 | 0.39 | 0.02 |
| Lrrc17               | 1395472_at | -2.7793 | -1.3539 | 0.4872 | 0.39 | 0.01 |
| NA                   | 1380306_at | -2.6757 | -1.3936 | 0.5208 | 0.40 | 0.01 |
| Gkap1                | 1379909_at | -4.0431 | -1.3414 | 0.3318 | 0.40 | 0.00 |
| NA                   | 1380057_at | -3.0512 | -1.3094 | 0.4291 | 0.40 | 0.00 |
| RGD1562983_predicted | 1372684_at | -3.4247 | -1.3128 | 0.3833 | 0.40 | 0.00 |
| NA                   | 1374774_at | -3.7492 | -1.3395 | 0.3573 | 0.40 | 0.00 |
| Rnase1               | 1393026_at | -3.0208 | -1.3843 | 0.4583 | 0.40 | 0.00 |
| Dixdc1               | 1390127_at | -2.6201 | -1.2567 | 0.4797 | 0.40 | 0.01 |
| ltpr1                | 1387907_at | -3.9109 | -1.3519 | 0.3457 | 0.40 | 0.00 |
| Tcp11l2              | 1388471_at | -3.7702 | -1.3449 | 0.3567 | 0.40 | 0.00 |
| NA                   | 1383838_at | -2.1814 | -1.5174 | 0.6956 | 0.40 | 0.01 |
| RGD1306233_predicted | 1385602_at | -3.0099 | -1.3714 | 0.4556 | 0.40 | 0.00 |
| Tpm1                 | 1390471_at | -3.5832 | -1.3115 | 0.3660 | 0.40 | 0.00 |
| Pgf                  | 1368919_at | -4.1796 | -1.3242 | 0.3168 | 0.40 | 0.00 |
| Grem1                | 1369113_at | -2.3675 | -1.3159 | 0.5558 | 0.40 | 0.01 |
| Abcg4                | 1376172_at | -2.9238 | -1.3775 | 0.4711 | 0.40 | 0.00 |
| Trim2                | 1373578_at | -2.4785 | -1.4739 | 0.5947 | 0.40 | 0.01 |
| Ide                  | 1381097_at | -2.8186 | -1.4040 | 0.4981 | 0.40 | 0.01 |
| RGD1307081           | 1394309_at | -2.9918 | -1.3661 | 0.4566 | 0.40 | 0.00 |
| NA                   | 1376170_at | -3.1746 | -1.3438 | 0.4233 | 0.40 | 0.00 |
| Ace2                 | 1380962_at | -2.6111 | -1.4224 | 0.5448 | 0.40 | 0.01 |
| NA                   | 1377572_at | -2.8790 | -1.3157 | 0.4570 | 0.40 | 0.01 |
| Scn4b                | 1373188_at | -2.5843 | -1.3445 | 0.5203 | 0.40 | 0.01 |
| RGD1563892_predicted | 1375890_at | -3.5330 | -1.3048 | 0.3693 | 0.40 | 0.00 |
| NA                   | 1392613_at | -2.3115 | -1.4271 | 0.6174 | 0.40 | 0.01 |
| NA                   | 1398406_at | -2.7665 | -1.3471 | 0.4869 | 0.40 | 0.01 |
| Dscr1l1              | 1374235_at | -3.3659 | -1.3170 | 0.3913 | 0.40 | 0.00 |
| Alad                 | 1367720_at | -4.2599 | -1.3169 | 0.3091 | 0.40 | 0.00 |
| Ctsl                 | 1370245_at | -4.4995 | -1.3101 | 0.2912 | 0.40 | 0.00 |
| Twist1               | 1378165_at | -3.3248 | -1.3248 | 0.3985 | 0.40 | 0.00 |

|                      |              |         |         |        |      |      |
|----------------------|--------------|---------|---------|--------|------|------|
| Arl12_predicted      | 1391341_at   | -3.3372 | -1.3341 | 0.3998 | 0.40 | 0.00 |
| LOC681900            | 1391240_at   | -2.7640 | -1.3214 | 0.4781 | 0.40 | 0.01 |
| RGD1310470           | 1392556_at   | -3.7477 | -1.3154 | 0.3510 | 0.40 | 0.00 |
| NA                   | 1373545_at   | -3.6869 | -1.2961 | 0.3515 | 0.40 | 0.00 |
| Cntrob_predicted     | 1383020_at   | -2.9394 | -1.3372 | 0.4549 | 0.40 | 0.00 |
| NA                   | 1374710_at   | -2.3303 | -1.3136 | 0.5637 | 0.40 | 0.01 |
| RGD1564924_predicted | 1377563_at   | -3.0047 | -1.2947 | 0.4309 | 0.40 | 0.00 |
| NA                   | 1381048_at   | -4.1459 | -1.2950 | 0.3124 | 0.40 | 0.00 |
| Rhoj                 | 1372835_at   | -3.3586 | -1.2896 | 0.3840 | 0.40 | 0.00 |
| NA                   | 1388743_at   | -3.1964 | -1.2970 | 0.4058 | 0.40 | 0.00 |
| RGD1306676           | 1393832_at   | -4.0858 | -1.3143 | 0.3217 | 0.40 | 0.00 |
| LOC681849            | 1373648_at   | -2.7790 | -1.2943 | 0.4657 | 0.40 | 0.01 |
| Lamb2                | 1367880_at   | -3.9735 | -1.3034 | 0.3280 | 0.41 | 0.00 |
| Rnase4               | 1368943_at   | -3.3631 | -1.3155 | 0.3912 | 0.41 | 0.00 |
| MGC94010             | 1373592_at   | -3.0382 | -1.2653 | 0.4165 | 0.41 | 0.00 |
| Col1a2               | 1370155_at   | -2.3856 | -1.3056 | 0.5473 | 0.41 | 0.01 |
| Dhrs4                | 1370814_at   | -3.9249 | -1.3027 | 0.3319 | 0.41 | 0.00 |
| Cox8h                | 1367739_at   | -2.1105 | -1.3824 | 0.6550 | 0.41 | 0.02 |
| NA                   | 1384980_at   | -2.8199 | -1.3657 | 0.4843 | 0.41 | 0.01 |
| LOC500152            | 1392053_at   | -2.9536 | -1.3436 | 0.4549 | 0.41 | 0.00 |
| Bhlhb3               | 1368511_at   | -3.5999 | -1.2759 | 0.3544 | 0.41 | 0.00 |
| NA                   | 1379647_at   | -2.8039 | -1.3544 | 0.4830 | 0.41 | 0.01 |
| Cyp2f2               | 1368608_at   | -2.7206 | -1.3677 | 0.5027 | 0.41 | 0.01 |
| Brunol6_predicted    | 1393330_at   | -3.4244 | -1.2817 | 0.3743 | 0.41 | 0.00 |
| Cybrd1               | 1376344_at   | -2.5785 | -1.3401 | 0.5197 | 0.41 | 0.01 |
| NA                   | 1373801_at   | -3.9176 | -1.2889 | 0.3290 | 0.41 | 0.00 |
| RGD1307524_predicted | 1389007_at   | -4.5432 | -1.2823 | 0.2822 | 0.41 | 0.00 |
| NA                   | 1379779_at   | -2.8869 | -1.2544 | 0.4345 | 0.41 | 0.01 |
| RGD1560766_predicted | 1393653_at   | -3.2895 | -1.2783 | 0.3886 | 0.41 | 0.00 |
| NA                   | 1379672_at   | -3.3537 | -1.2837 | 0.3828 | 0.41 | 0.00 |
| Spg20                | 1372633_at   | -4.1035 | -1.2866 | 0.3135 | 0.41 | 0.00 |
| R3hdm1               | 1380854_at   | -3.8163 | -1.2897 | 0.3379 | 0.41 | 0.00 |
| NA                   | 1378555_at   | -3.4800 | -1.2792 | 0.3676 | 0.41 | 0.00 |
| Ak1                  | 1389185_at   | -3.5948 | -1.2688 | 0.3530 | 0.41 | 0.00 |
| NA                   | 1374060_at   | -3.4353 | -1.2799 | 0.3726 | 0.41 | 0.00 |
| llvbl_predicted      | 1373512_at   | -2.9758 | -1.2905 | 0.4337 | 0.41 | 0.00 |
| Ppp1r3c              | 1395236_at   | -3.9834 | -1.2879 | 0.3233 | 0.41 | 0.00 |
| NA                   | 1379707_at   | -2.2851 | -1.1963 | 0.5235 | 0.41 | 0.01 |
| Gup1_predicted       | 1383413_at   | -2.6143 | -1.2419 | 0.4750 | 0.41 | 0.01 |
| Pacsin2              | 1372857_at   | -4.4255 | -1.2705 | 0.2871 | 0.41 | 0.00 |
| NA                   | 1379882_a_at | -3.6119 | -1.2832 | 0.3553 | 0.41 | 0.00 |
| Bicc1_predicted      | 1373696_at   | -2.9017 | -1.2943 | 0.4460 | 0.41 | 0.01 |
| Ide                  | 1387652_at   | -3.3414 | -1.3047 | 0.3905 | 0.41 | 0.00 |
| Tmem35               | 1397227_at   | -4.3826 | -1.2667 | 0.2890 | 0.41 | 0.00 |
| Scn7a                | 1370973_at   | -2.8449 | -1.3258 | 0.4660 | 0.41 | 0.01 |
| NA                   | 1380017_at   | -3.7605 | -1.2607 | 0.3352 | 0.41 | 0.00 |
| Pdgfc                | 1392274_at   | -3.0649 | -1.2590 | 0.4108 | 0.41 | 0.00 |
| NA                   | 1382021_at   | -3.7092 | -1.2723 | 0.3430 | 0.41 | 0.00 |
| Ntf3                 | 1387267_at   | -4.5469 | -1.2713 | 0.2796 | 0.41 | 0.00 |
| Sdpr                 | 1382452_at   | -2.7564 | -1.2474 | 0.4525 | 0.41 | 0.01 |
| RGD1307506_predicted | 1372282_at   | -2.7975 | -1.2812 | 0.4580 | 0.41 | 0.01 |
| Nol3                 | 1368544_a_at | -4.1976 | -1.2766 | 0.3041 | 0.41 | 0.00 |
| Ate1_predicted       | 1377963_at   | -2.6986 | -1.2162 | 0.4507 | 0.42 | 0.01 |
| NA                   | 1381157_at   | -3.2975 | -1.2561 | 0.3809 | 0.42 | 0.00 |
| NA                   | 1388662_at   | -2.6837 | -1.3709 | 0.5108 | 0.42 | 0.01 |

|                      |              |         |         |        |      |      |
|----------------------|--------------|---------|---------|--------|------|------|
| LOC681869            | 1381223_at   | -2.3312 | -1.3987 | 0.6000 | 0.42 | 0.01 |
| LOC682044            | 1385687_at   | -2.5062 | -1.3751 | 0.5487 | 0.42 | 0.01 |
| Rapgef4              | 1371081_at   | -2.8793 | -1.2618 | 0.4382 | 0.42 | 0.01 |
| NA                   | 1385205_at   | -2.4323 | -1.3346 | 0.5487 | 0.42 | 0.01 |
| RGD1559427_predicted | 1392670_at   | -2.9331 | -1.2323 | 0.4201 | 0.42 | 0.00 |
| RGD1559697_predicted | 1380387_at   | -3.5531 | -1.2610 | 0.3549 | 0.42 | 0.00 |
| NA                   | 1386348_at   | -3.1519 | -1.3004 | 0.4126 | 0.42 | 0.00 |
| RGD1304623_predicted | 1389107_at   | -4.2347 | -1.2603 | 0.2976 | 0.42 | 0.00 |
| LOC680115            | 1383696_at   | -3.4070 | -1.2861 | 0.3775 | 0.42 | 0.00 |
| NA                   | 1395112_at   | -1.8247 | -1.1419 | 0.6258 | 0.42 | 0.03 |
| NA                   | 1376584_at   | -3.5554 | -1.2514 | 0.3520 | 0.42 | 0.00 |
| Slc2a4               | 1388958_a_at | -4.1805 | -1.2653 | 0.3027 | 0.42 | 0.00 |
| Chrdl1               | 1376193_at   | -2.3034 | -1.3154 | 0.5711 | 0.42 | 0.01 |
| Igsf10               | 1390901_at   | -2.2068 | -1.3272 | 0.6014 | 0.42 | 0.01 |
| Klhl23_predicted     | 1393196_at   | -3.2976 | -1.2467 | 0.3781 | 0.42 | 0.00 |
| Ivd                  | 1370232_at   | -3.2700 | -1.2544 | 0.3836 | 0.42 | 0.00 |
| NA                   | 1374187_at   | -3.5364 | -1.2797 | 0.3619 | 0.42 | 0.00 |
| Akap12               | 1368868_at   | -3.7295 | -1.2520 | 0.3357 | 0.42 | 0.00 |
| NA                   | 1389376_at   | -2.8236 | -1.2994 | 0.4602 | 0.42 | 0.01 |
| NA                   | 1375001_at   | -3.3064 | -1.2963 | 0.3920 | 0.42 | 0.00 |
| Tgfb2                | 1376425_at   | -3.7685 | -1.2498 | 0.3316 | 0.42 | 0.00 |
| NA                   | 1376128_at   | -4.1601 | -1.2515 | 0.3008 | 0.42 | 0.00 |
| RGD1562629_predicted | 1383146_at   | -3.3589 | -1.2550 | 0.3737 | 0.42 | 0.00 |
| Gpr137b_predicted    | 1385025_a_at | -2.2812 | -1.3895 | 0.6091 | 0.42 | 0.01 |
| Gstm5                | 1370813_at   | -3.8207 | -1.2418 | 0.3250 | 0.42 | 0.00 |
| Spsb3_predicted      | 1372908_at   | -4.0854 | -1.2656 | 0.3098 | 0.42 | 0.00 |
| LOC641520            | 1383787_at   | -3.0761 | -1.2324 | 0.4007 | 0.42 | 0.00 |
| NA                   | 1372537_at   | -2.5964 | -1.2551 | 0.4834 | 0.42 | 0.01 |
| NA                   | 1391293_at   | -2.1521 | -1.2205 | 0.5671 | 0.42 | 0.02 |
| NA                   | 1380741_at   | -2.8923 | -1.2137 | 0.4196 | 0.42 | 0.01 |
| RGD1566234_predicted | 1371517_at   | -3.3969 | -1.2376 | 0.3643 | 0.42 | 0.00 |
| Zfp423               | 1368542_at   | -3.0557 | -1.2193 | 0.3990 | 0.42 | 0.00 |
| Optn                 | 1388432_at   | -3.7328 | -1.2391 | 0.3319 | 0.42 | 0.00 |
| NA                   | 1389592_at   | -2.9035 | -1.2224 | 0.4210 | 0.42 | 0.01 |
| Adcy9_predicted      | 1381063_at   | -4.7090 | -1.2408 | 0.2635 | 0.42 | 0.00 |
| Slc24a3              | 1376165_at   | -2.6393 | -1.2104 | 0.4586 | 0.42 | 0.01 |
| Egr3                 | 1392791_at   | -2.5452 | -1.3233 | 0.5199 | 0.42 | 0.01 |
| Btd                  | 1373672_at   | -2.8209 | -1.2166 | 0.4313 | 0.42 | 0.01 |
| Myh11                | 1380613_at   | -3.7148 | -1.2410 | 0.3341 | 0.42 | 0.00 |
| Il1r2                | 1387180_at   | -2.7813 | -1.2742 | 0.4581 | 0.42 | 0.01 |
| Mb                   | 1387768_at   | -2.5187 | -1.3142 | 0.5218 | 0.42 | 0.01 |
| Cte1                 | 1388211_s_at | -2.3015 | -1.1735 | 0.5099 | 0.42 | 0.01 |
| Tns                  | 1371361_at   | -3.5049 | -1.2328 | 0.3517 | 0.42 | 0.00 |
| Tspan2               | 1368104_at   | -2.7561 | -1.1965 | 0.4341 | 0.42 | 0.01 |
| RGD1559723_predicted | 1395201_at   | -3.1104 | -1.2455 | 0.4004 | 0.42 | 0.00 |
| NA                   | 1392203_at   | -3.7295 | -1.2386 | 0.3321 | 0.42 | 0.00 |
| Rrad                 | 1367862_at   | -4.3487 | -1.2384 | 0.2848 | 0.42 | 0.00 |
| NA                   | 1396435_at   | -3.2031 | -1.2284 | 0.3835 | 0.42 | 0.00 |
| Acadm                | 1367702_at   | -2.8379 | -1.2183 | 0.4293 | 0.42 | 0.01 |
| Xlkd1_predicted      | 1382192_at   | -3.0653 | -1.2777 | 0.4168 | 0.42 | 0.00 |
| NA                   | 1373872_at   | -3.3530 | -1.2398 | 0.3698 | 0.42 | 0.00 |
| NA                   | 1386376_at   | -2.4126 | -1.1857 | 0.4914 | 0.42 | 0.01 |
| RGD1561042_predicted | 1374874_at   | -3.5383 | -1.2393 | 0.3503 | 0.42 | 0.00 |
| NA                   | 1388876_at   | -2.6804 | -1.2071 | 0.4503 | 0.42 | 0.01 |
| Tcf8                 | 1376673_at   | -3.1854 | -1.2360 | 0.3880 | 0.43 | 0.00 |

|                      |              |         |         |        |      |      |
|----------------------|--------------|---------|---------|--------|------|------|
| LOC680039            | 1390023_at   | -3.0892 | -1.2588 | 0.4075 | 0.43 | 0.00 |
| Taok1                | 1388002_at   | -3.9250 | -1.2279 | 0.3128 | 0.43 | 0.00 |
| Schip1               | 1389367_at   | -2.9515 | -1.1981 | 0.4059 | 0.43 | 0.00 |
| RGD1559923_predicted | 1398452_at   | -2.9482 | -1.2085 | 0.4099 | 0.43 | 0.00 |
| Elov16               | 1388108_at   | -3.1975 | -1.2327 | 0.3855 | 0.43 | 0.00 |
| Pgcp                 | 1368399_a_at | -2.5231 | -1.2452 | 0.4935 | 0.43 | 0.01 |
| RGD1305928_predicted | 1380536_at   | -1.9431 | -1.4731 | 0.7581 | 0.43 | 0.02 |
| Tm4sf4               | 1368706_at   | -1.7584 | -1.2681 | 0.7212 | 0.43 | 0.04 |
| NA                   | 1379451_at   | -3.4202 | -1.2474 | 0.3647 | 0.43 | 0.00 |
| NA                   | 1382081_at   | -3.2430 | -1.2177 | 0.3755 | 0.43 | 0.00 |
| MGC109519            | 1372219_at   | -3.8785 | -1.2130 | 0.3128 | 0.43 | 0.00 |
| Gadd45g              | 1388792_at   | -4.1457 | -1.2371 | 0.2984 | 0.43 | 0.00 |
| Pllp                 | 1386943_at   | -2.3629 | -1.1412 | 0.4830 | 0.43 | 0.01 |
| Dst_predicted        | 1398598_at   | -3.9127 | -1.2191 | 0.3116 | 0.43 | 0.00 |
| Timp3                | 1389836_a_at | -3.2310 | -1.2070 | 0.3736 | 0.43 | 0.00 |
| Rasl12_predicted     | 1378484_at   | -2.6094 | -1.2001 | 0.4599 | 0.43 | 0.01 |
| Copz2_predicted      | 1372305_at   | -3.1174 | -1.2212 | 0.3918 | 0.43 | 0.00 |
| NA                   | 1383770_at   | -3.4305 | -1.2003 | 0.3499 | 0.43 | 0.00 |
| Zfp395_predicted     | 1390148_a_at | -3.3882 | -1.2316 | 0.3635 | 0.43 | 0.00 |
| Fkbp9                | 1375640_at   | -3.1930 | -1.2170 | 0.3811 | 0.43 | 0.00 |
| NA                   | 1381977_at   | -3.6263 | -1.2121 | 0.3342 | 0.43 | 0.00 |
| Btbd14a              | 1380459_at   | -3.2753 | -1.2305 | 0.3757 | 0.43 | 0.00 |
| LOC680115            | 1392953_at   | -3.6746 | -1.2327 | 0.3355 | 0.43 | 0.00 |
| Slc19a2              | 1390863_at   | -3.1487 | -1.1944 | 0.3793 | 0.43 | 0.00 |
| Myh10                | 1370158_at   | -3.6393 | -1.2040 | 0.3308 | 0.43 | 0.00 |
| Olfml1               | 1383453_at   | -2.9807 | -1.2013 | 0.4030 | 0.43 | 0.00 |
| Rai14                | 1384528_at   | -3.6084 | -1.2275 | 0.3402 | 0.43 | 0.00 |
| RGD1305633_predicted | 1370157_at   | -2.3864 | -1.1924 | 0.4997 | 0.43 | 0.01 |
| RGD1565037_predicted | 1388705_at   | -3.2770 | -1.2385 | 0.3779 | 0.43 | 0.00 |
| Kat3                 | 1374006_at   | -2.8442 | -1.2853 | 0.4519 | 0.43 | 0.01 |
| Plekhc1              | 1384182_at   | -3.3374 | -1.2255 | 0.3672 | 0.43 | 0.00 |
| Hsd17b3              | 1369553_at   | -3.1365 | -1.2362 | 0.3941 | 0.43 | 0.00 |
| Cacna1c              | 1379157_at   | -3.3930 | -1.1989 | 0.3533 | 0.43 | 0.00 |
| NA                   | 1392044_at   | -2.9793 | -1.2293 | 0.4126 | 0.43 | 0.00 |
| Sdc2                 | 1370167_at   | -2.8350 | -1.1981 | 0.4226 | 0.43 | 0.01 |
| NA                   | 1383193_at   | -3.4991 | -1.2204 | 0.3488 | 0.43 | 0.00 |
| Gucy1a3              | 1368154_at   | -3.2778 | -1.2289 | 0.3749 | 0.43 | 0.00 |
| Cfl2_predicted       | 1388483_at   | -4.2737 | -1.2106 | 0.2833 | 0.43 | 0.00 |
| NA                   | 1374622_at   | -3.0894 | -1.2213 | 0.3953 | 0.43 | 0.00 |
| RGD1310552_predicted | 1382764_at   | -2.6098 | -1.2710 | 0.4870 | 0.43 | 0.01 |
| Gulp1                | 1376285_at   | -2.5812 | -1.2216 | 0.4733 | 0.43 | 0.01 |
| NA                   | 1374868_at   | -3.3832 | -1.1981 | 0.3541 | 0.43 | 0.00 |
| Pafah1b1             | 1393279_at   | -2.7114 | -1.1869 | 0.4377 | 0.43 | 0.01 |
| Xlkd1_predicted      | 1382732_at   | -3.1195 | -1.2437 | 0.3987 | 0.43 | 0.00 |
| Ptgis                | 1370012_at   | -3.9189 | -1.2038 | 0.3072 | 0.43 | 0.00 |
| LOC690329            | 1382695_at   | -3.2263 | -1.2148 | 0.3765 | 0.43 | 0.00 |
| RGD1560177_predicted | 1373151_at   | -3.4323 | -1.2098 | 0.3525 | 0.43 | 0.00 |
| NA                   | 1374171_at   | -3.0628 | -1.2198 | 0.3983 | 0.43 | 0.00 |
| Sult5a1_predicted    | 1374691_at   | -3.4548 | -1.1943 | 0.3457 | 0.43 | 0.00 |
| Nid2                 | 1388618_at   | -2.7079 | -1.1761 | 0.4343 | 0.43 | 0.01 |
| RGD1560155_predicted | 1382552_at   | -3.3866 | -1.1988 | 0.3540 | 0.43 | 0.00 |
| NA                   | 1383439_at   | -2.2872 | -1.1926 | 0.5214 | 0.43 | 0.01 |
| Arl4a                | 1367960_at   | -4.1287 | -1.2076 | 0.2925 | 0.43 | 0.00 |
| NA                   | 1373599_at   | -2.9397 | -1.1834 | 0.4025 | 0.43 | 0.00 |
| Cacng1               | 1369706_at   | -2.0915 | -1.1297 | 0.5402 | 0.43 | 0.02 |

|                      |              |         |         |        |      |      |
|----------------------|--------------|---------|---------|--------|------|------|
| LOC499677            | 1372234_at   | -2.9750 | -1.1893 | 0.3998 | 0.43 | 0.00 |
| Fads1                | 1367857_at   | -2.8344 | -1.1974 | 0.4224 | 0.44 | 0.01 |
| Gpd1                 | 1371363_at   | -2.6941 | -1.1509 | 0.4272 | 0.44 | 0.01 |
| Col6a3_predicted     | 1389966_at   | -2.3255 | -1.1865 | 0.5102 | 0.44 | 0.01 |
| Rims1                | 1369332_a_at | -3.0447 | -1.1949 | 0.3925 | 0.44 | 0.00 |
| NA                   | 1372318_at   | -2.8710 | -1.1910 | 0.4148 | 0.44 | 0.01 |
| Serpinf1             | 1388569_at   | -2.7585 | -1.1780 | 0.4270 | 0.44 | 0.01 |
| Chodl_predicted      | 1378252_at   | -2.2320 | -1.1205 | 0.5020 | 0.44 | 0.01 |
| Art3                 | 1372065_at   | -2.3980 | -1.1908 | 0.4966 | 0.44 | 0.01 |
| Tle2                 | 1374861_at   | -2.5116 | -1.1956 | 0.4760 | 0.44 | 0.01 |
| Myh1                 | 1370971_at   | -2.4522 | -1.2249 | 0.4995 | 0.44 | 0.01 |
| Abca8a_predicted     | 1390783_at   | -3.0642 | -1.2122 | 0.3956 | 0.44 | 0.00 |
| NA                   | 1385638_at   | -3.5073 | -1.2014 | 0.3425 | 0.44 | 0.00 |
| Ppap2b               | 1372101_at   | -2.9436 | -1.2156 | 0.4130 | 0.44 | 0.00 |
| NA                   | 1393827_at   | -1.9461 | -1.3560 | 0.6968 | 0.44 | 0.02 |
| Ncam1                | 1383686_at   | -2.4322 | -1.1968 | 0.4921 | 0.44 | 0.01 |
| Osbp1a               | 1383830_a_at | -2.7853 | -1.2468 | 0.4476 | 0.44 | 0.01 |
| NA                   | 1374703_at   | -3.4634 | -1.1811 | 0.3410 | 0.44 | 0.00 |
| NA                   | 1384433_at   | -2.8207 | -1.1662 | 0.4135 | 0.44 | 0.01 |
| Rab15                | 1373646_at   | -4.1486 | -1.1955 | 0.2882 | 0.44 | 0.00 |
| NA                   | 1384546_at   | -3.5492 | -1.1783 | 0.3320 | 0.44 | 0.00 |
| NA                   | 1383884_at   | -3.4689 | -1.1951 | 0.3445 | 0.44 | 0.00 |
| Wasl                 | 1376124_at   | -2.9315 | -1.2117 | 0.4133 | 0.44 | 0.00 |
| RGD1562778_predicted | 1374017_at   | -2.3396 | -1.1876 | 0.5076 | 0.44 | 0.01 |
| Cacna1h              | 1368398_at   | -2.6392 | -1.1859 | 0.4493 | 0.44 | 0.01 |
| LOC687022            | 1380486_at   | -4.0682 | -1.1815 | 0.2904 | 0.44 | 0.00 |
| NA                   | 1376194_at   | -2.9983 | -1.2090 | 0.4032 | 0.44 | 0.00 |
| P4ha2_predicted      | 1372610_at   | -3.3355 | -1.1923 | 0.3574 | 0.44 | 0.00 |
| Tspan2               | 1368105_at   | -2.6750 | -1.1288 | 0.4220 | 0.44 | 0.01 |
| Frzb                 | 1373615_at   | -2.7833 | -1.1342 | 0.4075 | 0.44 | 0.01 |
| Cyhr1                | 1377738_a_at | -3.8508 | -1.1792 | 0.3062 | 0.44 | 0.00 |
| Capn8                | 1387292_s_at | -2.6949 | -1.1546 | 0.4285 | 0.44 | 0.01 |
| NA                   | 1378467_at   | -3.5845 | -1.1983 | 0.3343 | 0.44 | 0.00 |
| NA                   | 1383412_at   | -2.5776 | -1.1283 | 0.4377 | 0.44 | 0.01 |
| LOC686460            | 1375055_at   | -2.3924 | -1.1139 | 0.4656 | 0.44 | 0.01 |
| RGD1564938_predicted | 1371877_at   | -2.8504 | -1.2276 | 0.4307 | 0.44 | 0.01 |
| Snx22_predicted      | 1378699_at   | -2.3050 | -1.2192 | 0.5289 | 0.44 | 0.01 |
| Trim63               | 1387804_at   | -2.2224 | -1.1633 | 0.5234 | 0.44 | 0.01 |
| Hspb2                | 1370018_at   | -3.5750 | -1.1694 | 0.3271 | 0.44 | 0.00 |
| Nrap_predicted       | 1374099_at   | -2.1718 | -1.2329 | 0.5677 | 0.44 | 0.02 |
| NA                   | 1380831_at   | -2.6577 | -1.1594 | 0.4363 | 0.44 | 0.01 |
| RGD1560062_predicted | 1389214_at   | -3.3570 | -1.1663 | 0.3474 | 0.44 | 0.00 |
| NA                   | 1376015_at   | -3.1928 | -1.1596 | 0.3632 | 0.44 | 0.00 |
| Nt5e                 | 1384112_at   | -4.0910 | -1.1791 | 0.2882 | 0.44 | 0.00 |
| NA                   | 1392619_at   | -2.2785 | -1.2904 | 0.5664 | 0.44 | 0.01 |
| Aldh6a1              | 1387344_at   | -3.1948 | -1.1955 | 0.3742 | 0.44 | 0.00 |
| Cln8                 | 1389791_at   | -3.2115 | -1.2042 | 0.3750 | 0.44 | 0.00 |
| NA                   | 1384248_at   | -2.8267 | -1.2080 | 0.4273 | 0.44 | 0.01 |
| LOC498996            | 1372103_at   | -3.6371 | -1.1765 | 0.3235 | 0.44 | 0.00 |
| Tcf21                | 1388782_at   | -2.7236 | -1.2046 | 0.4423 | 0.44 | 0.01 |
| Cachd1_predicted     | 1379663_at   | -3.7204 | -1.1781 | 0.3166 | 0.45 | 0.00 |
| NA                   | 1374971_at   | -2.5620 | -1.1146 | 0.4351 | 0.45 | 0.01 |
| NA                   | 1392935_at   | -2.7990 | -1.1497 | 0.4107 | 0.45 | 0.01 |
| Akr1c12_predicted    | 1379803_at   | -3.1591 | -1.1682 | 0.3698 | 0.45 | 0.00 |
| LOC304558            | 1376610_a_at | -3.2956 | -1.1701 | 0.3551 | 0.45 | 0.00 |



|                      |              |         |         |        |      |      |
|----------------------|--------------|---------|---------|--------|------|------|
| Nefh                 | 1370815_at   | -2.0138 | -1.3914 | 0.6909 | 0.45 | 0.02 |
| RGD1309985_predicted | 1389084_at   | -3.5099 | -1.1546 | 0.3290 | 0.45 | 0.00 |
| Pygm                 | 1375476_at   | -2.3030 | -1.1215 | 0.4870 | 0.45 | 0.01 |
| LOC315970            | 1383028_at   | -3.1496 | -1.1564 | 0.3672 | 0.45 | 0.00 |
| Xkr6                 | 1379321_at   | -3.5824 | -1.1721 | 0.3272 | 0.45 | 0.00 |
| Boc_predicted        | 1389095_at   | -3.3953 | -1.1654 | 0.3432 | 0.45 | 0.00 |
| Tpm1                 | 1391841_at   | -3.0706 | -1.1323 | 0.3688 | 0.45 | 0.00 |
| LOC303730            | 1374978_at   | -2.1970 | -1.3269 | 0.6040 | 0.45 | 0.01 |
| RGD1561019_predicted | 1377868_at   | -2.9223 | -1.1731 | 0.4014 | 0.45 | 0.00 |
| NA                   | 1379719_at   | -3.0773 | -1.1278 | 0.3665 | 0.45 | 0.00 |
| Synpr                | 1368865_at   | -3.1502 | -1.1629 | 0.3692 | 0.45 | 0.00 |
| Npy1r                | 1390828_at   | -2.6682 | -1.1355 | 0.4256 | 0.45 | 0.01 |
| Prkch                | 1388836_at   | -3.3110 | -1.1734 | 0.3544 | 0.45 | 0.00 |
| Adamts8_predicted    | 1379022_at   | -2.8374 | -1.1417 | 0.4024 | 0.45 | 0.01 |
| Pcdh18_predicted     | 1384824_at   | -2.9360 | -1.1577 | 0.3943 | 0.45 | 0.00 |
| RGD1306809_predicted | 1382235_at   | -2.8102 | -1.1312 | 0.4025 | 0.45 | 0.01 |
| NA                   | 1383212_at   | -3.5738 | -1.1433 | 0.3199 | 0.45 | 0.00 |
| Col6a1_predicted     | 1371349_at   | -2.5227 | -1.1381 | 0.4512 | 0.45 | 0.01 |
| NA                   | 1395859_at   | -2.8996 | -1.1783 | 0.4064 | 0.45 | 0.01 |
| Nov                  | 1368883_at   | -2.6164 | -1.1081 | 0.4235 | 0.45 | 0.01 |
| LOC683917            | 1371680_at   | -4.1093 | -1.1448 | 0.2786 | 0.45 | 0.00 |
| Lrp16                | 1372158_at   | -3.1135 | -1.1745 | 0.3772 | 0.45 | 0.00 |
| Ltbp4                | 1371500_at   | -3.4433 | -1.1554 | 0.3356 | 0.45 | 0.00 |
| Mpdz                 | 1368133_at   | -2.7876 | -1.1751 | 0.4216 | 0.45 | 0.01 |
| Rbm22                | 1384826_a_at | -2.8712 | -1.1411 | 0.3974 | 0.45 | 0.01 |
| Fn1                  | 1370234_at   | -2.7584 | -1.1564 | 0.4192 | 0.45 | 0.01 |
| RGD1309847_predicted | 1384993_at   | -2.8787 | -1.1765 | 0.4087 | 0.45 | 0.01 |
| Ppp1r1a              | 1386968_at   | -2.3317 | -1.0900 | 0.4675 | 0.45 | 0.01 |
| NA                   | 1385973_at   | -2.8847 | -1.1529 | 0.3997 | 0.45 | 0.01 |
| LOC685004            | 1380236_at   | -3.5935 | -1.1388 | 0.3169 | 0.45 | 0.00 |
| Adcy6                | 1367644_at   | -3.8144 | -1.1362 | 0.2979 | 0.45 | 0.00 |
| Zc3h6_predicted      | 1379971_at   | -2.4982 | -1.1670 | 0.4671 | 0.45 | 0.01 |
| Agxt                 | 1387215_at   | -1.9724 | -1.0646 | 0.5397 | 0.45 | 0.02 |
| Cpxm1_predicted      | 1390420_at   | -1.7403 | -1.1496 | 0.6606 | 0.45 | 0.04 |
| Tgm2                 | 1369943_at   | -3.0077 | -1.1571 | 0.3847 | 0.45 | 0.00 |
| Dcn                  | 1370956_at   | -3.1478 | -1.1575 | 0.3677 | 0.45 | 0.00 |
| Gucy1b3              | 1369097_s_at | -2.5992 | -1.1049 | 0.4251 | 0.45 | 0.01 |
| NA                   | 1388795_at   | -2.6232 | -1.1462 | 0.4369 | 0.45 | 0.01 |
| Tjp3_predicted       | 1378567_at   | -2.8742 | -1.1648 | 0.4053 | 0.46 | 0.01 |
| Slit3                | 1391375_at   | -2.6559 | -1.1285 | 0.4249 | 0.46 | 0.01 |
| Dnajc6_predicted     | 1377125_at   | -2.8087 | -1.0993 | 0.3914 | 0.46 | 0.01 |
| RGD1563510_predicted | 1380766_a_at | -2.8772 | -1.1555 | 0.4016 | 0.46 | 0.01 |
| LOC684078            | 1396295_at   | -2.5259 | -1.0963 | 0.4340 | 0.46 | 0.01 |
| Nudt16_predicted     | 1375847_at   | -2.8606 | -1.1181 | 0.3909 | 0.46 | 0.01 |
| Pde4dip              | 1387373_at   | -2.4656 | -1.1057 | 0.4485 | 0.46 | 0.01 |
| Gabbr1               | 1375720_at   | -3.2380 | -1.1401 | 0.3521 | 0.46 | 0.00 |
| Bmp4                 | 1387232_at   | -3.5716 | -1.1308 | 0.3166 | 0.46 | 0.00 |
| LOC682100            | 1382084_at   | -3.0287 | -1.1650 | 0.3846 | 0.46 | 0.00 |
| Creb3                | 1391686_at   | -1.8531 | -1.3921 | 0.7513 | 0.46 | 0.03 |
| RGD1563286_predicted | 1389003_at   | -2.5629 | -1.1466 | 0.4474 | 0.46 | 0.01 |
| NA                   | 1388921_at   | -3.9014 | -1.1386 | 0.2918 | 0.46 | 0.00 |
| Foxm1                | 1392058_at   | -2.2960 | -1.0596 | 0.4615 | 0.46 | 0.01 |
| Gtpbp2               | 1374489_at   | -2.9044 | -1.1623 | 0.4002 | 0.46 | 0.01 |
| Pacsin2              | 1368068_a_at | -3.7646 | -1.1283 | 0.2997 | 0.46 | 0.00 |
| Bnc2_predicted       | 1385486_at   | -3.5923 | -1.1226 | 0.3125 | 0.46 | 0.00 |

|                  |              |         |         |        |      |      |
|------------------|--------------|---------|---------|--------|------|------|
| Dpt_predicted    | 1371732_at   | -2.9237 | -1.1239 | 0.3844 | 0.46 | 0.00 |
| Pcsk6            | 1387812_at   | -3.4938 | -1.1424 | 0.3270 | 0.46 | 0.00 |
| Klhl23_predicted | 1386577_at   | -2.6570 | -1.1032 | 0.4152 | 0.46 | 0.01 |
| Flna_predicted   | 1371382_at   | -2.9091 | -1.1207 | 0.3852 | 0.46 | 0.01 |
| Galr2            | 1384667_x_at | -2.4654 | -1.2140 | 0.4924 | 0.46 | 0.01 |
| Kcnip2           | 1373987_at   | -3.0446 | -1.1308 | 0.3714 | 0.46 | 0.00 |
| Cacna1c          | 1370452_at   | -2.9304 | -1.1188 | 0.3818 | 0.46 | 0.00 |
| NA               | 1373335_at   | -3.2027 | -1.1460 | 0.3578 | 0.46 | 0.00 |
| Umps             | 1382257_at   | -2.4714 | -1.1223 | 0.4541 | 0.46 | 0.01 |
| Nr2f2            | 1389998_at   | -2.8874 | -1.1412 | 0.3952 | 0.46 | 0.01 |
| Abcc9            | 1398265_at   | -2.8255 | -1.1219 | 0.3971 | 0.46 | 0.01 |
| Ddx25            | 1368619_at   | -2.6427 | -1.1744 | 0.4444 | 0.46 | 0.01 |
| Nap1l3           | 1387407_at   | -3.1038 | -1.1418 | 0.3679 | 0.46 | 0.00 |
| Cdh1             | 1393066_at   | -3.1182 | -1.1195 | 0.3590 | 0.46 | 0.00 |
| NA               | 1372979_at   | -3.1935 | -1.0991 | 0.3442 | 0.46 | 0.00 |
| Zbtb20_predicted | 1379578_at   | -3.4397 | -1.1267 | 0.3276 | 0.46 | 0.00 |
| Rras_predicted   | 1388729_at   | -3.3403 | -1.1261 | 0.3371 | 0.46 | 0.00 |
| Cav3             | 1387814_at   | -2.1585 | -1.1373 | 0.5269 | 0.46 | 0.02 |
| LOC684921        | 1384093_at   | -3.3779 | -1.1134 | 0.3296 | 0.46 | 0.00 |
| Atp1b1           | 1386937_at   | -1.9550 | -1.1706 | 0.5988 | 0.46 | 0.02 |
| LOC301118        | 1393660_at   | -1.8523 | -1.2952 | 0.6992 | 0.46 | 0.03 |
| LOC687551        | 1383405_at   | -1.9230 | -1.1145 | 0.5796 | 0.46 | 0.02 |
| Map3k8           | 1369393_at   | -4.1301 | -1.1064 | 0.2679 | 0.46 | 0.00 |
| Ncoa3            | 1392385_at   | -3.0694 | -1.1456 | 0.3732 | 0.46 | 0.00 |
| Srpx             | 1368671_at   | -2.1775 | -1.1806 | 0.5422 | 0.46 | 0.02 |
| Zfp537_predicted | 1377853_at   | -3.0846 | -1.1191 | 0.3628 | 0.46 | 0.00 |
| NA               | 1377736_at   | -3.1325 | -1.0969 | 0.3502 | 0.46 | 0.00 |
| Ddx46            | 1397622_at   | -2.8021 | -1.1227 | 0.4007 | 0.46 | 0.01 |
| Osbp1a           | 1378263_at   | -2.7970 | -1.1523 | 0.4120 | 0.46 | 0.01 |
| Cry1             | 1392640_at   | -2.4459 | -1.1683 | 0.4777 | 0.46 | 0.01 |
| NA               | 1394101_at   | -3.6125 | -1.1083 | 0.3068 | 0.46 | 0.00 |
| Mfap5_predicted  | 1373674_at   | -3.0685 | -1.0908 | 0.3555 | 0.46 | 0.00 |
| Pik3r1           | 1380882_at   | -2.9864 | -1.0868 | 0.3639 | 0.46 | 0.00 |
| Tst              | 1370881_at   | -3.7125 | -1.1043 | 0.2974 | 0.46 | 0.00 |
| NA               | 1382296_at   | -2.4763 | -1.0865 | 0.4387 | 0.46 | 0.01 |
| RGD1310507       | 1398577_at   | -2.4151 | -1.1587 | 0.4798 | 0.46 | 0.01 |
| Mageh1           | 1395316_at   | -2.6790 | -1.1167 | 0.4168 | 0.47 | 0.01 |
| Csnk1e           | 1389212_at   | -3.3209 | -1.1067 | 0.3333 | 0.47 | 0.00 |
| Tfpi             | 1389780_at   | -2.4773 | -1.1083 | 0.4474 | 0.47 | 0.01 |
| Asb12            | 1374989_at   | -2.0562 | -1.0658 | 0.5183 | 0.47 | 0.02 |
| Map1b            | 1395357_at   | -3.0748 | -1.0875 | 0.3537 | 0.47 | 0.00 |
| NA               | 1389150_at   | -3.0720 | -1.0831 | 0.3526 | 0.47 | 0.00 |
| NA               | 1389311_at   | -2.9152 | -1.0983 | 0.3768 | 0.47 | 0.01 |
| Rcn3_predicted   | 1373128_at   | -3.0364 | -1.1167 | 0.3678 | 0.47 | 0.00 |
| LOC499677        | 1392070_at   | -2.2798 | -1.0582 | 0.4642 | 0.47 | 0.01 |
| LOC678766        | 1389500_at   | -2.5070 | -1.1712 | 0.4672 | 0.47 | 0.01 |
| Plod2            | 1372897_at   | -2.4840 | -1.0753 | 0.4329 | 0.47 | 0.01 |
| Abhd3_predicted  | 1382137_at   | -2.0822 | -1.0572 | 0.5077 | 0.47 | 0.02 |
| Tef              | 1390819_at   | -3.5232 | -1.1095 | 0.3149 | 0.47 | 0.00 |
| Mmp11            | 1367858_at   | -3.3628 | -1.1036 | 0.3282 | 0.47 | 0.00 |
| Sparc            | 1367563_at   | -1.9539 | -1.0357 | 0.5300 | 0.47 | 0.02 |
| Rai14            | 1389263_at   | -3.1382 | -1.1073 | 0.3528 | 0.47 | 0.00 |
| Hdac5            | 1397587_at   | -3.0121 | -1.1150 | 0.3702 | 0.47 | 0.00 |
| Gna14            | 1381557_at   | -2.6799 | -1.0688 | 0.3988 | 0.47 | 0.01 |
| Chrm3            | 1387462_at   | -2.8710 | -1.0802 | 0.3762 | 0.47 | 0.01 |

|                      |              |         |         |        |      |      |
|----------------------|--------------|---------|---------|--------|------|------|
| Pfkm                 | 1386961_at   | -2.1929 | -1.0373 | 0.4730 | 0.47 | 0.01 |
| NA                   | 1389632_at   | -3.4695 | -1.1024 | 0.3177 | 0.47 | 0.00 |
| Grtp1                | 1390918_at   | -3.0730 | -1.1223 | 0.3652 | 0.47 | 0.00 |
| RGD1559565_predicted | 1376770_at   | -2.6555 | -1.0666 | 0.4017 | 0.47 | 0.01 |
| NA                   | 1388672_at   | -3.3059 | -1.1004 | 0.3329 | 0.47 | 0.00 |
| NA                   | 1389394_at   | -2.6722 | -1.0541 | 0.3945 | 0.47 | 0.01 |
| NA                   | 1384501_at   | -2.5233 | -1.0556 | 0.4183 | 0.47 | 0.01 |
| Ceecam1              | 1374763_at   | -2.8806 | -1.0794 | 0.3747 | 0.47 | 0.01 |
| Vof16                | 1377778_at   | -2.2937 | -1.0640 | 0.4639 | 0.47 | 0.01 |
| Ms4a8b_predicted     | 1376359_at   | -2.3955 | -1.0729 | 0.4479 | 0.47 | 0.01 |
| NA                   | 1393063_at   | -2.9634 | -1.0808 | 0.3647 | 0.47 | 0.00 |
| NA                   | 1381206_at   | -2.3695 | -1.1591 | 0.4892 | 0.47 | 0.01 |
| RGD1309472           | 1374073_at   | -3.9945 | -1.0836 | 0.2713 | 0.47 | 0.00 |
| Rnase4               | 1371475_at   | -2.8241 | -1.0917 | 0.3865 | 0.47 | 0.01 |
| NA                   | 1374172_at   | -2.7211 | -1.1245 | 0.4133 | 0.47 | 0.01 |
| NA                   | 1374269_at   | -3.1027 | -1.0909 | 0.3516 | 0.47 | 0.00 |
| NA                   | 1380466_at   | -3.4341 | -1.0746 | 0.3129 | 0.47 | 0.00 |
| Prrx1                | 1384840_at   | -3.3008 | -1.0870 | 0.3293 | 0.47 | 0.00 |
| RGD1310693_predicted | 1391840_at   | -2.1116 | -1.1877 | 0.5625 | 0.47 | 0.02 |
| Cxxc5                | 1371629_at   | -3.1763 | -1.0770 | 0.3391 | 0.47 | 0.00 |
| Gas7                 | 1370963_at   | -3.0154 | -1.0796 | 0.3580 | 0.47 | 0.00 |
| NA                   | 1381819_at   | -2.5882 | -1.1256 | 0.4349 | 0.47 | 0.01 |
| NA                   | 1382317_at   | -2.7983 | -1.0818 | 0.3866 | 0.47 | 0.01 |
| Armcx2               | 1373156_at   | -2.3825 | -1.0890 | 0.4571 | 0.47 | 0.01 |
| Phyh                 | 1393245_at   | -4.0145 | -1.0758 | 0.2680 | 0.47 | 0.00 |
| NA                   | 1379900_at   | -2.4250 | -1.1441 | 0.4718 | 0.47 | 0.01 |
| Prkch                | 1369830_at   | -3.6646 | -1.0784 | 0.2943 | 0.47 | 0.00 |
| Sema3d               | 1397335_at   | -2.3202 | -1.0770 | 0.4642 | 0.47 | 0.01 |
| NA                   | 1379934_at   | -3.2733 | -1.0627 | 0.3247 | 0.47 | 0.00 |
| NA                   | 1380975_at   | -4.3189 | -1.0779 | 0.2496 | 0.47 | 0.00 |
| NA                   | 1386529_at   | -2.4668 | -1.1257 | 0.4563 | 0.47 | 0.01 |
| RGD1564253_predicted | 1382469_at   | -3.4493 | -1.0748 | 0.3116 | 0.47 | 0.00 |
| NA                   | 1384700_at   | -1.8327 | -1.2635 | 0.6894 | 0.48 | 0.03 |
| Nbl1                 | 1387004_at   | -3.1048 | -1.0789 | 0.3475 | 0.48 | 0.00 |
| LOC304037            | 1376411_at   | -2.6148 | -1.0720 | 0.4100 | 0.48 | 0.01 |
| NA                   | 1385924_at   | -2.8719 | -1.0674 | 0.3717 | 0.48 | 0.01 |
| Synj2bp              | 1368038_at   | -3.4183 | -1.0697 | 0.3129 | 0.48 | 0.00 |
| Pdgfrl               | 1374616_at   | -2.3897 | -1.1015 | 0.4610 | 0.48 | 0.01 |
| Tacr3                | 1368752_at   | -1.8683 | -0.9866 | 0.5281 | 0.48 | 0.03 |
| Edg2                 | 1374016_at   | -2.3203 | -1.0820 | 0.4663 | 0.48 | 0.01 |
| Bmyc                 | 1388274_at   | -3.7536 | -1.0721 | 0.2856 | 0.48 | 0.00 |
| NA                   | 1377161_at   | -2.7729 | -1.0796 | 0.3893 | 0.48 | 0.01 |
| Tpm1                 | 1395794_at   | -2.6290 | -1.0320 | 0.3925 | 0.48 | 0.01 |
| Ophn1_predicted      | 1378198_at   | -2.4226 | -1.0753 | 0.4439 | 0.48 | 0.01 |
| Grb14                | 1368618_at   | -2.6073 | -1.0393 | 0.3986 | 0.48 | 0.01 |
| NA                   | 1398415_at   | -3.1166 | -1.0565 | 0.3390 | 0.48 | 0.00 |
| Pbxip1               | 1381262_at   | -2.6853 | -1.1040 | 0.4111 | 0.48 | 0.01 |
| Dkk3                 | 1370328_at   | -3.1708 | -1.0597 | 0.3342 | 0.48 | 0.00 |
| NA                   | 1395390_at   | -2.2385 | -1.0803 | 0.4826 | 0.48 | 0.01 |
| NA                   | 1373092_at   | -2.7390 | -1.0704 | 0.3908 | 0.48 | 0.01 |
| Naglt1               | 1383518_at   | -2.7524 | -1.0391 | 0.3775 | 0.48 | 0.01 |
| Smtn                 | 1396885_at   | -2.5899 | -1.0643 | 0.4109 | 0.48 | 0.01 |
| NA                   | 1380470_x_at | -3.0790 | -1.0670 | 0.3466 | 0.48 | 0.00 |
| LOC679624            | 1385716_at   | -2.0749 | -0.9976 | 0.4808 | 0.48 | 0.02 |
| Arhgap23_predicted   | 1372307_at   | -2.9225 | -1.0793 | 0.3693 | 0.48 | 0.00 |

|                      |              |         |         |        |      |      |
|----------------------|--------------|---------|---------|--------|------|------|
| Leprel2_predicted    | 1373750_at   | -2.5728 | -1.1050 | 0.4295 | 0.48 | 0.01 |
| NA                   | 1391582_at   | -3.2685 | -1.0779 | 0.3298 | 0.48 | 0.00 |
| Cry2                 | 1372548_at   | -4.0032 | -1.0581 | 0.2643 | 0.48 | 0.00 |
| LOC300191            | 1373613_at   | -3.0966 | -1.0742 | 0.3469 | 0.48 | 0.00 |
| Sardh                | 1372323_at   | -3.3642 | -1.0706 | 0.3182 | 0.48 | 0.00 |
| RGD1561817_predicted | 1380100_at   | -2.6252 | -1.0260 | 0.3908 | 0.48 | 0.01 |
| Fthfd                | 1368378_at   | -2.0217 | -1.0848 | 0.5366 | 0.48 | 0.02 |
| Rora_predicted       | 1377029_at   | -2.1535 | -1.1862 | 0.5508 | 0.48 | 0.02 |
| RGD1561171_predicted | 1374929_at   | -2.9934 | -1.0594 | 0.3539 | 0.48 | 0.00 |
| Wbp5_predicted       | 1389857_at   | -3.0130 | -1.0656 | 0.3537 | 0.48 | 0.00 |
| Kbtbd10              | 1391008_at   | -2.1458 | -1.0324 | 0.4812 | 0.48 | 0.02 |
| NA                   | 1376149_at   | -3.1501 | -1.0662 | 0.3385 | 0.48 | 0.00 |
| RGD1307160_predicted | 1374305_at   | -2.9960 | -1.0577 | 0.3530 | 0.48 | 0.00 |
| RGD1560113_predicted | 1386125_at   | -3.4644 | -1.0592 | 0.3057 | 0.48 | 0.00 |
| Papss2_predicted     | 1376047_at   | -2.6277 | -1.0333 | 0.3932 | 0.48 | 0.01 |
| LOC498564            | 1383708_at   | -2.3026 | -1.0119 | 0.4395 | 0.48 | 0.01 |
| Hyal3                | 1373797_at   | -3.8397 | -1.0536 | 0.2744 | 0.48 | 0.00 |
| NA                   | 1384724_at   | -2.5844 | -1.0200 | 0.3947 | 0.48 | 0.01 |
| Loxl3_predicted      | 1385695_at   | -3.3906 | -1.0546 | 0.3110 | 0.48 | 0.00 |
| Tmod4_predicted      | 1372407_at   | -2.5093 | -1.0150 | 0.4045 | 0.48 | 0.01 |
| NA                   | 1376911_at   | -2.5675 | -1.0210 | 0.3977 | 0.48 | 0.01 |
| NA                   | 1380558_at   | -2.1117 | -1.1456 | 0.5425 | 0.48 | 0.02 |
| Mcpt1                | 1370405_at   | -1.7754 | -1.0056 | 0.5664 | 0.48 | 0.04 |
| NA                   | 1391011_at   | -2.3012 | -1.0311 | 0.4481 | 0.48 | 0.01 |
| NA                   | 1389905_at   | -2.8162 | -1.0775 | 0.3826 | 0.48 | 0.01 |
| NA                   | 1394184_at   | -3.7752 | -1.0433 | 0.2764 | 0.48 | 0.00 |
| RGD1312005_predicted | 1375999_at   | -2.6221 | -1.0110 | 0.3856 | 0.49 | 0.01 |
| NA                   | 1389694_at   | -2.0018 | -0.9913 | 0.4952 | 0.49 | 0.02 |
| NA                   | 1399096_at   | -3.0705 | -1.0464 | 0.3408 | 0.49 | 0.00 |
| RGD1306233_predicted | 1385629_at   | -2.2996 | -1.0936 | 0.4755 | 0.49 | 0.01 |
| Snrpn                | 1369085_s_at | -1.8346 | -1.0182 | 0.5550 | 0.49 | 0.03 |
| Tob1                 | 1368132_at   | -3.3892 | -1.0387 | 0.3065 | 0.49 | 0.00 |
| LOC304860            | 1382874_at   | -1.8880 | -1.2377 | 0.6556 | 0.49 | 0.03 |
| Lepr                 | 1388232_a_at | -2.2842 | -1.0597 | 0.4639 | 0.49 | 0.01 |
| Ank1                 | 1389398_at   | -1.9427 | -0.9740 | 0.5014 | 0.49 | 0.02 |
| NA                   | 1374542_at   | -2.4633 | -1.0817 | 0.4391 | 0.49 | 0.01 |
| Rora_predicted       | 1379397_at   | -2.0811 | -1.1642 | 0.5594 | 0.49 | 0.02 |
| Txlnb_predicted      | 1386437_at   | -2.3855 | -1.0045 | 0.4211 | 0.49 | 0.01 |
| Sparc                | 1367562_at   | -1.7253 | -1.0320 | 0.5982 | 0.49 | 0.04 |
| Rasgrp2_predicted    | 1374649_at   | -2.4211 | -1.0624 | 0.4388 | 0.49 | 0.01 |
| NA                   | 1385322_at   | -2.6894 | -1.0246 | 0.3810 | 0.49 | 0.01 |
| NA                   | 1378860_at   | -2.6222 | -1.0549 | 0.4023 | 0.49 | 0.01 |
| Fstl1                | 1368822_at   | -2.7373 | -1.0280 | 0.3756 | 0.49 | 0.01 |
| Col5a2               | 1373463_at   | -1.8375 | -0.9930 | 0.5404 | 0.49 | 0.03 |
| Prelp                | 1387886_at   | -3.7187 | -1.0290 | 0.2767 | 0.49 | 0.00 |
| Ptrf_predicted       | 1371406_at   | -3.2109 | -1.0365 | 0.3228 | 0.49 | 0.00 |
| Pla2g3_predicted     | 1384741_at   | -2.2453 | -0.9890 | 0.4405 | 0.49 | 0.01 |
| Tfpi                 | 1368323_at   | -2.5230 | -1.0320 | 0.4090 | 0.49 | 0.01 |
| NA                   | 1378269_at   | -3.7456 | -1.0362 | 0.2767 | 0.49 | 0.00 |
| NA                   | 1377806_at   | -3.3729 | -1.0386 | 0.3079 | 0.49 | 0.00 |
| NA                   | 1376886_at   | -2.9055 | -1.0319 | 0.3551 | 0.49 | 0.01 |
| Snrpb                | 1381941_at   | -3.1783 | -1.0431 | 0.3282 | 0.49 | 0.00 |
| NA                   | 1390341_at   | -2.8157 | -1.0303 | 0.3659 | 0.49 | 0.01 |
| NA                   | 1378645_at   | -3.0301 | -1.0418 | 0.3438 | 0.49 | 0.00 |
| Tcf8                 | 1370965_at   | -3.6935 | -1.0321 | 0.2794 | 0.49 | 0.00 |

|                      |              |         |         |        |      |      |
|----------------------|--------------|---------|---------|--------|------|------|
| NA                   | 1372481_at   | -3.1990 | -1.0247 | 0.3203 | 0.49 | 0.00 |
| NA                   | 1383750_at   | -2.0782 | -0.9736 | 0.4685 | 0.49 | 0.02 |
| Zbtb4_predicted      | 1375867_at   | -2.9573 | -1.0275 | 0.3475 | 0.49 | 0.00 |
| LOC304558            | 1383948_at   | -3.5262 | -1.0291 | 0.2918 | 0.49 | 0.00 |
| Sept8_predicted      | 1386296_at   | -3.3672 | -1.0253 | 0.3045 | 0.49 | 0.00 |
| NA                   | 1389256_at   | -3.1994 | -1.0243 | 0.3202 | 0.49 | 0.00 |
| Nrp2                 | 1382995_at   | -2.9466 | -1.0170 | 0.3451 | 0.49 | 0.00 |
| Casc4_predicted      | 1374081_at   | -2.5410 | -1.0504 | 0.4134 | 0.49 | 0.01 |
| Amt                  | 1383920_at   | -3.3027 | -1.0432 | 0.3159 | 0.49 | 0.00 |
| RGD1564043_predicted | 1389086_at   | -2.7820 | -1.0358 | 0.3723 | 0.49 | 0.01 |
| Pi16_predicted       | 1380484_at   | -1.9715 | -1.0067 | 0.5107 | 0.49 | 0.02 |
| Il12a                | 1369315_at   | -3.0163 | -1.0320 | 0.3421 | 0.49 | 0.00 |
| Cbara1               | 1376715_at   | -3.1996 | -1.0451 | 0.3266 | 0.49 | 0.00 |
| NA                   | 1373533_at   | -3.2066 | -1.0161 | 0.3169 | 0.49 | 0.00 |
| Tdg                  | 1395074_at   | -1.9111 | -0.9524 | 0.4983 | 0.49 | 0.02 |
| Slc43a1_predicted    | 1378196_at   | -3.5277 | -1.0337 | 0.2930 | 0.49 | 0.00 |
| Pxmp2                | 1367885_at   | -3.1732 | -1.0317 | 0.3251 | 0.49 | 0.00 |
| Zfp503_predicted     | 1386721_at   | -3.0752 | -1.0371 | 0.3373 | 0.49 | 0.00 |
| LOC316395            | 1397630_at   | -2.4419 | -1.0075 | 0.4126 | 0.49 | 0.01 |
| NA                   | 1381088_at   | -3.4477 | -1.0310 | 0.2990 | 0.49 | 0.00 |
| NA                   | 1397944_at   | -3.3678 | -1.0292 | 0.3056 | 0.49 | 0.00 |
| NA                   | 1385570_at   | -2.0079 | -1.0199 | 0.5079 | 0.49 | 0.02 |
| Cmya1_predicted      | 1389119_at   | -2.1430 | -1.0286 | 0.4800 | 0.49 | 0.02 |
| Efna3                | 1384861_at   | -3.0780 | -1.0276 | 0.3339 | 0.49 | 0.00 |
| Lrrc48               | 1391765_at   | -2.5621 | -1.0227 | 0.3992 | 0.49 | 0.01 |
| NA                   | 1385201_at   | -2.7637 | -1.0349 | 0.3745 | 0.49 | 0.01 |
| Osbp1a               | 1390923_a_at | -2.3159 | -1.0944 | 0.4726 | 0.49 | 0.01 |
| Cml3                 | 1370991_at   | -1.8080 | -0.9851 | 0.5449 | 0.49 | 0.03 |
| Aplp2                | 1380895_at   | -3.3589 | -1.0220 | 0.3043 | 0.49 | 0.00 |
| Dci                  | 1367659_s_at | -2.8429 | -1.0348 | 0.3640 | 0.49 | 0.01 |
| Kctd14_predicted     | 1395966_at   | -2.6960 | -1.0270 | 0.3809 | 0.49 | 0.01 |
| NA                   | 1383745_at   | -3.6484 | -1.0156 | 0.2784 | 0.49 | 0.00 |
| RGD1562511_predicted | 1371635_at   | -3.4016 | -1.0196 | 0.2997 | 0.49 | 0.00 |
| Creg_predicted       | 1375428_at   | -2.8237 | -1.0351 | 0.3666 | 0.49 | 0.01 |
| LOC686539            | 1389020_at   | -1.9865 | -0.9472 | 0.4768 | 0.49 | 0.02 |
| Sh3gl1               | 1395680_at   | -2.7331 | -1.0107 | 0.3698 | 0.49 | 0.01 |
| Svil_predicted       | 1376572_a_at | -2.6230 | -0.9958 | 0.3796 | 0.49 | 0.01 |
| Abcc9                | 1387287_a_at | -2.4244 | -1.0589 | 0.4368 | 0.49 | 0.01 |
| LOC683917            | 1378842_at   | -3.0088 | -1.0144 | 0.3371 | 0.49 | 0.00 |
| LOC686590            | 1372358_at   | -3.1702 | -1.0228 | 0.3226 | 0.49 | 0.00 |
| NA                   | 1374087_at   | -3.2311 | -1.0297 | 0.3187 | 0.49 | 0.00 |
| Dpep1                | 1368281_at   | -2.4191 | -1.0227 | 0.4228 | 0.50 | 0.01 |
| NA                   | 1383169_at   | -2.5418 | -1.0327 | 0.4063 | 0.50 | 0.01 |
| NA                   | 1391977_at   | -2.8422 | -1.0211 | 0.3593 | 0.50 | 0.01 |
| Habp4_predicted      | 1389665_at   | -3.3649 | -1.0151 | 0.3017 | 0.50 | 0.00 |
| NA                   | 1378068_at   | -2.9758 | -0.9964 | 0.3348 | 0.50 | 0.00 |
| Cpxm2_predicted      | 1373148_at   | -2.4625 | -0.9938 | 0.4036 | 0.50 | 0.01 |
| Stk10                | 1367936_at   | -3.2414 | -1.0270 | 0.3168 | 0.50 | 0.00 |
| Slc22a17             | 1371889_at   | -3.5514 | -1.0165 | 0.2862 | 0.50 | 0.00 |
| Amotl1_predicted     | 1371627_at   | -3.3908 | -1.0174 | 0.3001 | 0.50 | 0.00 |
| Smyd1_predicted      | 1397578_at   | -2.1001 | -0.9565 | 0.4555 | 0.50 | 0.02 |
| Fap                  | 1369422_at   | -2.2059 | -1.0090 | 0.4574 | 0.50 | 0.01 |
| Trim2                | 1375278_at   | -2.1458 | -1.1242 | 0.5239 | 0.50 | 0.02 |
| RGD1564833_predicted | 1373652_at   | -2.2520 | -1.0073 | 0.4473 | 0.50 | 0.01 |
| Casc1_predicted      | 1376217_at   | -3.3900 | -0.9992 | 0.2947 | 0.50 | 0.00 |

|                      |              |         |         |        |      |      |
|----------------------|--------------|---------|---------|--------|------|------|
| Epb4.113             | 1370503_s_at | -2.8320 | -1.0268 | 0.3626 | 0.50 | 0.01 |
| NA                   | 1390429_at   | -2.9937 | -1.0174 | 0.3399 | 0.50 | 0.00 |
| Atp1b1               | 1367814_at   | -1.7609 | -1.0675 | 0.6062 | 0.50 | 0.04 |
| NA                   | 1374907_at   | -1.8544 | -0.9074 | 0.4893 | 0.50 | 0.03 |
| Plekhm1              | 1380867_a_at | -3.6356 | -1.0105 | 0.2779 | 0.50 | 0.00 |
| NA                   | 1376786_a_at | -2.6890 | -1.0396 | 0.3866 | 0.50 | 0.01 |
| Adh7                 | 1369072_at   | -2.8673 | -1.0344 | 0.3608 | 0.50 | 0.01 |
| RGD1561831_predicted | 1378675_at   | -1.9491 | -1.1318 | 0.5807 | 0.50 | 0.02 |
| NA                   | 1385560_at   | -1.6818 | -0.8794 | 0.5229 | 0.50 | 0.04 |
| LOC310013            | 1395689_at   | -2.9047 | -0.9863 | 0.3395 | 0.50 | 0.01 |
| Pcna                 | 1371593_at   | -3.0212 | -0.9904 | 0.3278 | 0.50 | 0.00 |
| NA                   | 1372110_at   | -2.9520 | -0.9917 | 0.3359 | 0.50 | 0.00 |
| NA                   | 1389511_s_at | -3.0649 | -1.0092 | 0.3293 | 0.50 | 0.00 |
| Col14a1_predicted    | 1376105_at   | -2.2842 | -1.0237 | 0.4482 | 0.50 | 0.01 |
| Rhoq                 | 1386967_at   | -3.4316 | -0.9954 | 0.2901 | 0.50 | 0.00 |
| Cabc1                | 1372536_at   | -1.9346 | -1.0709 | 0.5536 | 0.50 | 0.02 |
| RGD1306327           | 1373266_at   | -2.9253 | -1.0106 | 0.3455 | 0.50 | 0.00 |
| NA                   | 1391154_at   | -2.6338 | -0.9793 | 0.3718 | 0.50 | 0.01 |
| Ctsl                 | 1370244_at   | -2.9845 | -1.0002 | 0.3351 | 0.50 | 0.00 |
| Tcf3_predicted       | 1390283_at   | -3.8007 | -0.9966 | 0.2622 | 0.50 | 0.00 |
| Elovl6               | 1394401_at   | -2.9258 | -0.9823 | 0.3357 | 0.50 | 0.00 |
| Egln3                | 1368174_at   | -3.3619 | -0.9925 | 0.2952 | 0.50 | 0.00 |
| LOC363915            | 1382147_at   | -2.9043 | -0.9889 | 0.3405 | 0.50 | 0.01 |
| Cpeb2_predicted      | 1390628_at   | -2.8895 | -1.0155 | 0.3514 | 0.50 | 0.01 |
| LOC686192            | 1373755_at   | -2.3303 | -1.0196 | 0.4376 | 0.50 | 0.01 |
| Inpp5a_predicted     | 1388697_at   | -3.3617 | -0.9889 | 0.2942 | 0.50 | 0.00 |
| Ndrp4                | 1370229_at   | -2.6270 | -0.9752 | 0.3712 | 0.50 | 0.01 |
| Lzts2                | 1389190_at   | -3.6648 | -1.0011 | 0.2732 | 0.50 | 0.00 |
| LOC686098            | 1374263_at   | -2.2984 | -1.0043 | 0.4370 | 0.50 | 0.01 |
| NA                   | 1377328_at   | -2.9062 | -0.9804 | 0.3374 | 0.50 | 0.01 |
| Pcdh7                | 1382422_at   | -2.4814 | -0.9781 | 0.3942 | 0.50 | 0.01 |
| Glrp1_predicted      | 1398708_at   | -2.0436 | -1.0624 | 0.5199 | 0.50 | 0.02 |
| Sumf1_predicted      | 1374588_at   | -2.5419 | -1.0277 | 0.4043 | 0.50 | 0.01 |
| LOC362264            | 1378423_at   | -1.8098 | -0.9329 | 0.5154 | 0.50 | 0.03 |
| Tpst1                | 1383321_at   | -2.4734 | -1.0161 | 0.4108 | 0.50 | 0.01 |
| Gucy1b3              | 1395132_at   | -2.6747 | -0.9807 | 0.3667 | 0.50 | 0.01 |
| NA                   | 1379356_at   | -2.8287 | -0.9906 | 0.3502 | 0.50 | 0.01 |
| NA                   | 1372807_at   | -3.1076 | -0.9918 | 0.3191 | 0.50 | 0.00 |
| NA                   | 1397837_at   | -2.7501 | -0.9984 | 0.3630 | 0.50 | 0.01 |
| Tmem38a_predicted    | 1389171_at   | -2.2749 | -0.9826 | 0.4319 | 0.50 | 0.01 |
| Pcsk5                | 1392773_at   | -2.4175 | -0.9758 | 0.4037 | 0.50 | 0.01 |
| NA                   | 1391370_at   | -2.5876 | -1.0054 | 0.3886 | 0.50 | 0.01 |
| Lrp4                 | 1370932_at   | -2.8712 | -0.9791 | 0.3410 | 0.50 | 0.01 |
| NA                   | 1377427_at   | -2.3404 | -0.9857 | 0.4212 | 0.50 | 0.01 |
| Pvrl3_predicted      | 1378027_at   | -2.3508 | -0.9589 | 0.4079 | 0.50 | 0.01 |
| Colec12              | 1372818_at   | -2.1650 | -1.0015 | 0.4626 | 0.50 | 0.02 |
| RGD1564291_predicted | 1374643_at   | -2.4499 | -0.9664 | 0.3944 | 0.50 | 0.01 |
| RGD1305773_predicted | 1381685_a_at | -2.5093 | -1.0294 | 0.4102 | 0.50 | 0.01 |

\*Affymetrix probe ID corresponds to the Rat Genome 230 2.0 Array.

\*\*Fold change represents ZD vs ZS esophageal mucosa

Inflammatory probe sets denoted in Table 1 are highlighted in yellow.
