# Supplementary material for: Dietary zinc deficiency fuels esophageal cancer development by inducing a distinct inflammatory signature
Source: Springer Nature journal article supplement (doi:10.1038/onc.2011.592), 2011-12-19
Supplement: 41388_2012_BFonc2011592_MOESM8_ESM.pdf [file 41388_2012_BFonc2011592_MOESM8_ESM.pdf]

**Dataset 2a** Expression profiling of ZR vs ZS esophagus at 5 wks post first NMBA dose (cutoff point: q-value < 5% and ≥ 2-fold difference)

| No Up-regulated probe sets associated with ZR         | Affymetrix Probe ID*        | Score (d)        | Numerator (r)        | Denominator (s+s0)        | Fold-Change**        | q-value(%)        |
|-------------------------------------------------------|-----------------------------|------------------|----------------------|---------------------------|----------------------|-------------------|
| <b>3 Down-regulated probe sets associated with ZR</b> | <b>Affymetrix Probe ID*</b> | <b>Score (d)</b> | <b>Numerator (r)</b> | <b>Denominator (s+s0)</b> | <b>Fold-Change**</b> | <b>q-value(%)</b> |
| NA                                                    | 1380306_at                  | -5.346           | -1.729               | 0.323                     | 0.31                 | 0.00              |
| NA                                                    | 1397225_at                  | -5.169           | -1.766               | 0.342                     | 0.31                 | 0.00              |
| Aqp4                                                  | 1372190_at                  | -8.023           | -1.254               | 0.156                     | 0.42                 | 0.00              |

**Dataset 2b** Expression profiling of ZR vs ZS esophagus at tumor endpoint after 3 NMBA doses (cutoff point: q-value < 5% and ≥ 2-fold difference)

| 46 Up-regulated probe sets associated with ZR | Affymetrix Probe ID* | Score (d) | Numerator (r) | Denominator (s+s0) | Fold-Change** | q-value(%) |
|-----------------------------------------------|----------------------|-----------|---------------|--------------------|---------------|------------|
| NA                                            | 1380552_at           | 4.028     | 2.743         | 0.681              | 7.18          | 0.00       |
| NA                                            | 1375422_at           | 5.253     | 2.567         | 0.489              | 6.25          | 0.00       |
| Ppp2r4_predicted                              | 1395409_at           | 3.449     | 1.987         | 0.576              | 3.60          | 0.00       |
| LOC683586 /// LOC685072                       | 1390771_at           | 3.299     | 1.898         | 0.575              | 3.40          | 0.00       |
| NA                                            | 1392736_at           | 2.692     | 1.980         | 0.736              | 3.13          | 0.00       |
| RGD1564982_predicted                          | 1381913_at           | 3.988     | 1.644         | 0.412              | 3.03          | 0.00       |
| Itga1                                         | 1387144_at           | 3.128     | 1.685         | 0.539              | 2.98          | 0.00       |
| RGD1565646_predicted                          | 1375153_at           | 2.854     | 1.695         | 0.594              | 2.94          | 0.00       |
| NA                                            | 1381503_at           | 2.377     | 1.622         | 0.682              | 2.84          | 1.24       |
| Mcm6                                          | 1371074_a_at         | 3.310     | 1.543         | 0.466              | 2.75          | 0.00       |
| Abca1                                         | 1394490_at           | 2.287     | 1.463         | 0.639              | 2.71          | 1.69       |
| NA                                            | 1389986_at           | 2.533     | 1.464         | 0.578              | 2.66          | 0.75       |
| NA                                            | 1378507_at           | 3.108     | 1.397         | 0.449              | 2.59          | 0.00       |
| NA                                            | 1382431_at           | 1.990     | 1.291         | 0.649              | 2.49          | 3.29       |
| MGC105830 /// LOC682488                       | 1393669_at           | 2.410     | 1.450         | 0.602              | 2.48          | 1.24       |
| Ccnd2                                         | 1370810_at           | 4.076     | 1.315         | 0.323              | 2.47          | 0.00       |
| NA                                            | 1386641_at           | 4.614     | 1.264         | 0.274              | 2.40          | 0.00       |
| NA                                            | 1373536_at           | 2.205     | 1.504         | 0.682              | 2.34          | 2.08       |
| RGD1561749_predicted                          | 1374805_at           | 2.970     | 1.288         | 0.434              | 2.33          | 0.00       |
| Kcnh1                                         | 1396147_at           | 2.837     | 1.261         | 0.444              | 2.31          | 0.00       |
| Sema6a_predicted                              | 1392795_at           | 2.679     | 1.239         | 0.462              | 2.29          | 0.00       |
| Zfp36l2                                       | 1389851_at           | 2.541     | 1.261         | 0.496              | 2.28          | 0.75       |
| MGC105830 /// LOC682488                       | 1385270_s_at         | 2.268     | 1.285         | 0.566              | 2.21          | 1.69       |
| Timeless                                      | 1368522_at           | 3.022     | 1.161         | 0.384              | 2.19          | 0.00       |
| Ebf1                                          | 1394709_at           | 3.103     | 1.158         | 0.373              | 2.18          | 0.00       |
| Smarca4                                       | 1375469_at           | 2.999     | 1.121         | 0.374              | 2.17          | 0.00       |
| RGD1306894_predicted                          | 1395900_at           | 2.868     | 1.106         | 0.386              | 2.16          | 0.00       |
| Dedd                                          | 1369003_at           | 2.074     | 1.070         | 0.516              | 2.14          | 2.61       |
| NA                                            | 1390436_at           | 3.295     | 1.083         | 0.329              | 2.14          | 0.00       |
| Dbp                                           | 1387874_at           | 2.160     | 1.229         | 0.569              | 2.14          | 2.19       |
| NA                                            | 1398528_at           | 2.668     | 1.135         | 0.425              | 2.14          | 0.00       |
| Lasp1                                         | 1387844_at           | 2.577     | 1.141         | 0.443              | 2.13          | 0.44       |
| Eps8l2_predicted                              | 1392324_at           | 2.230     | 1.202         | 0.539              | 2.12          | 2.08       |
| Cdh13                                         | 1369425_at           | 2.617     | 1.133         | 0.433              | 2.11          | 0.00       |
| Arhgap1_predicted                             | 1393113_at           | 2.765     | 1.086         | 0.393              | 2.10          | 0.00       |
| Mpp7                                          | 1394924_at           | 2.420     | 1.063         | 0.439              | 2.10          | 1.24       |

|                              |              |       |       |       |      |      |
|------------------------------|--------------|-------|-------|-------|------|------|
| Zfp91                        | 1383052_a_at | 3.406 | 1.065 | 0.313 | 2.08 | 0.00 |
| Dhx36_predicted              | 1377906_at   | 3.443 | 1.056 | 0.307 | 2.08 | 0.00 |
| Mcm3_predicted /// LOC367976 | 1372406_at   | 2.720 | 1.090 | 0.401 | 2.08 | 0.00 |
| Thy1                         | 1369651_at   | 3.268 | 1.024 | 0.313 | 2.05 | 0.00 |
| Mcm2_predicted               | 1374036_at   | 2.687 | 1.076 | 0.401 | 2.04 | 0.00 |
| Ris2_predicted               | 1377967_at   | 2.562 | 1.086 | 0.424 | 2.04 | 0.44 |
| Nr2f6 /// LOC688367          | 1370380_s_at | 3.188 | 1.037 | 0.325 | 2.03 | 0.00 |
| Dhx36_predicted              | 1379101_at   | 2.748 | 1.043 | 0.380 | 2.01 | 0.00 |
| Cdh13                        | 1375719_s_at | 2.448 | 1.067 | 0.436 | 2.01 | 0.75 |
| Ube2e2                       | 1376438_at   | 2.991 | 0.996 | 0.333 | 2.01 | 0.00 |

| 41 Down-regulated probe sets associated with ZR | Affymetrix Probe ID* | Score (d) | Numerator (r) | Denominator (s+s0) | Fold-Change** | q-value(%) |
|-------------------------------------------------|----------------------|-----------|---------------|--------------------|---------------|------------|
| NA                                              | 1373759_at           | -3.545    | -2.839        | 0.801              | 0.11          | 0.00       |
| Thbs1                                           | 1394109_at           | -3.628    | -2.613        | 0.720              | 0.16          | 0.00       |
| Thbs1                                           | 1374529_at           | -3.490    | -2.558        | 0.733              | 0.19          | 0.00       |
| Nr4a3                                           | 1369067_at           | -3.381    | -1.993        | 0.589              | 0.27          | 0.00       |
| NA                                              | 1392613_at           | -3.225    | -1.846        | 0.572              | 0.27          | 0.00       |
| Hspa1b                                          | 1370912_at           | -4.418    | -1.852        | 0.419              | 0.28          | 0.00       |
| NA                                              | 1397225_at           | -3.121    | -1.846        | 0.591              | 0.28          | 0.00       |
| Nrg1                                            | 1369783_a_at         | -3.107    | -1.722        | 0.554              | 0.29          | 0.00       |
| Tas1r2                                          | 1372379_at           | -3.147    | -1.688        | 0.537              | 0.29          | 0.00       |
| NA                                              | 1380306_at           | -2.989    | -1.743        | 0.583              | 0.30          | 0.00       |
| Nr4a3                                           | 1393389_at           | -3.610    | -1.703        | 0.472              | 0.30          | 0.00       |
| NA                                              | 1393018_at           | -3.526    | -1.698        | 0.482              | 0.31          | 0.00       |
| Adamts9_predicted                               | 1376481_at           | -3.816    | -1.566        | 0.411              | 0.33          | 0.00       |
| LOC301121                                       | 1391184_at           | -3.565    | -1.544        | 0.433              | 0.34          | 0.00       |
| Nr4a1                                           | 1386935_at           | -2.670    | -1.490        | 0.558              | 0.34          | 0.83       |
| Cyp2a3a                                         | 1369136_at           | -2.907    | -1.491        | 0.513              | 0.34          | 0.00       |
| Hspa1a /// Hspa1b                               | 1368247_at           | -3.703    | -1.554        | 0.420              | 0.34          | 0.00       |
| Atf3                                            | 1369268_at           | -2.732    | -1.402        | 0.513              | 0.35          | 0.83       |
| Filip1                                          | 1379463_at           | -3.267    | -1.347        | 0.412              | 0.38          | 0.00       |
| Tnfrsf12a                                       | 1371785_at           | -2.752    | -1.308        | 0.475              | 0.39          | 0.44       |
| NA                                              | 1388795_at           | -2.248    | -1.211        | 0.539              | 0.39          | 2.67       |
| Dnaja1                                          | 1368852_at           | -3.921    | -1.301        | 0.332              | 0.40          | 0.00       |
| Dnaja1                                          | 1398819_at           | -3.864    | -1.270        | 0.329              | 0.41          | 0.00       |
| NA                                              | 1392012_at           | -2.128    | -1.438        | 0.676              | 0.41          | 3.87       |
| Mest                                            | 1371731_at           | -2.145    | -1.172        | 0.546              | 0.42          | 3.87       |
| Tas1r2                                          | 1382743_at           | -2.552    | -1.200        | 0.470              | 0.43          | 1.29       |
| Nrg1                                            | 1371211_a_at         | -2.243    | -1.200        | 0.535              | 0.43          | 2.67       |
| Pdia3                                           | 1375388_at           | -2.616    | -1.142        | 0.436              | 0.44          | 0.83       |
| NA                                              | 1385569_at           | -2.434    | -1.129        | 0.464              | 0.45          | 2.08       |
| Crem                                            | 1369737_at           | -2.666    | -1.113        | 0.417              | 0.45          | 0.83       |
| NA                                              | 1383697_at           | -2.184    | -1.051        | 0.481              | 0.46          | 3.29       |
| NA                                              | 1383439_at           | -2.906    | -1.102        | 0.379              | 0.46          | 0.00       |
| NA                                              | 1378645_at           | -2.640    | -1.080        | 0.409              | 0.46          | 0.83       |
| PVR                                             | 1370177_at           | -2.319    | -1.064        | 0.459              | 0.46          | 2.19       |
| Eed_predicted                                   | 1378925_at           | -3.268    | -1.107        | 0.339              | 0.46          | 0.00       |
| Tas1r2                                          | 1395796_at           | -2.593    | -1.087        | 0.419              | 0.47          | 1.29       |
| Abra                                            | 1390881_at           | -2.084    | -1.008        | 0.484              | 0.47          | 4.62       |
| NA                                              | 1382493_at           | -2.516    | -1.074        | 0.427              | 0.48          | 1.69       |
| LOC690728                                       | 1398107_at           | -2.323    | -0.995        | 0.428              | 0.49          | 2.19       |
| NA                                              | 1384770_at           | -2.464    | -1.022        | 0.415              | 0.49          | 1.69       |

|                       |            |        |        |       |      |      |
|-----------------------|------------|--------|--------|-------|------|------|
| <u>Prc1_predicted</u> | 1392899_at | -2.401 | -0.995 | 0.414 | 0.50 | 2.08 |
|-----------------------|------------|--------|--------|-------|------|------|

---

\*Affymetrix probe ID corresponds to the Rat Genome 230 2.0 Array.

\*\*Fold change represents ZR vs ZS esophageal mucosa
