# Supplementary material for: Dietary zinc deficiency fuels esophageal cancer development by inducing a distinct inflammatory signature
Source: Springer Nature journal article supplement (doi:10.1038/onc.2011.592), 2011-12-19
Supplement: 41388_2012_BFonc2011592_MOESM9_ESM.pdf [file 41388_2012_BFonc2011592_MOESM9_ESM.pdf]

**Dataset 3a** Comparison of the expression profile of ZD esophagus at tumor endpoint with the published esophageal profile<sup>‡</sup> at 6 wks of ZD diet without NMBA

**Description of the problem:**

Number of classes: 2

Number of genes used for random variance estimation: 31099

Number of genes that passed filtering criteria: 31099

Type of univariate test used: Two-sample T-test (with random variance model)

Univariate test random variance model parameters:

a= 1.90741 , b= 11.98356 , Kolmogorov-Smirnov statistic= 0.0092

Nominal significance level of each univariate test: 0.001

**Summary of Results:**

Number of genes significant at 0.001 level of the univariate test: **861 (630 up-regulated and 231 down-regulated)**

**Genes that discriminate among classes:**

Sorted by Fold-Change

Class 1: ZD esophagus at 5 wks after the first NMBA dose

Class 2: ZD esophagus (No NMBA treatment) (Gastroenterology. 2009, 136:953-966)<sup>‡</sup> treatment.

\*\*Affymetrix probe ID corresponds to the Rat Genome 230 2.0 Array.

Inflammatory probe sets denoted in Table 1 are highlighted in yellow.

| p-value | FDR  | Geom mean of intensities in class 1 | Geom mean of intensities in class 2 | Fold-change* | Affymetrix Probe ID** | Gene symbol | Gene Name                                                                  |
|---------|------|-------------------------------------|-------------------------------------|--------------|-----------------------|-------------|----------------------------------------------------------------------------|
| 0.00    | 0.00 | 18628.90                            | 116.90                              | 159.36       | 1387125_at            | S100a9      | S100 calcium binding protein A9                                            |
| 0.00    | 0.00 | 1117.33                             | 22.12                               | 50.52        | 1370371_a_at          | Ceacam10    | carcinoembryonic antigen-related cell adhesion molecule 10                 |
| 0.00    | 0.00 | 312.04                              | 8.71                                | 35.81        | 1385107_at            | Slc6a14     | solute carrier family 6 (neurotransmitter transporter), member 14          |
| 0.00    | 0.01 | 407.42                              | 14.28                               | 28.53        | 1368760_at            | Cxcl2       | chemokine (C-X-C motif) ligand 2                                           |
| 0.00    | 0.02 | 1699.86                             | 63.71                               | 26.68        | 1377429_at            | Lpo         | lactoperoxidase                                                            |
| 0.00    | 0.01 | 1380.17                             | 60.71                               | 22.73        | 1387963_a_at          | Uox         | urate oxidase                                                              |
| 0.00    | 0.01 | 187.81                              | 8.96                                | 20.97        | 1377264_at            | Il17f       | interleukin 17F                                                            |
| 0.00    | 0.00 | 499.78                              | 27.18                               | 18.39        | 1371016_at            | RGD1311300  | similar to T cell receptor V delta 6                                       |
| 0.00    | 0.01 | 9926.13                             | 575.50                              | 17.25        | 1373349_at            | LOC683295   | similar to keratin complex 2, basic, gene 6a                               |
| 0.00    | 0.00 | 293.13                              | 18.04                               | 16.25        | 1390890_at            | NA          | NA                                                                         |
| 0.00    | 0.00 | 552.25                              | 35.19                               | 15.69        | 1389748_at            | NA          | NA                                                                         |
| 0.00    | 0.00 | 179.59                              | 12.20                               | 14.72        | 1385519_at            | Runx1t1     | runt-related transcription factor 1; translocated to, 1 (cyclin D-related) |
| 0.00    | 0.01 | 816.85                              | 56.12                               | 14.56        | 1398256_at            | Il1b        | interleukin 1 beta                                                         |
| 0.00    | 0.01 | 828.42                              | 61.91                               | 13.38        | 1374236_at            | Lgi2        | leucine-rich repeat LGI family, member 2                                   |
| 0.00    | 0.00 | 388.12                              | 29.90                               | 12.98        | 1368000_at            | C3          | complement component 3                                                     |
| 0.00    | 0.01 | 372.70                              | 29.06                               | 12.83        | 1395294_at            | NA          | NA                                                                         |
| 0.00    | 0.01 | 444.21                              | 34.77                               | 12.78        | 1387011_at            | Lcn2        | lipocalin 2                                                                |
| 0.00    | 0.01 | 493.50                              | 41.04                               | 12.02        | 1388275_at            | Tcrb        | T-cell receptor beta chain                                                 |
| 0.00    | 0.00 | 282.41                              | 23.83                               | 11.85        | 1391447_at            | NA          | NA                                                                         |
| 0.00    | 0.00 | 412.53                              | 41.04                               | 10.05        | 1370924_at            | Tcrb        | T-cell receptor beta chain                                                 |
| 0.00    | 0.01 | 345.75                              | 35.16                               | 9.83         | 1368270_at            | Apobec1     | apolipoprotein B mRNA editing enzyme, catalytic polypeptide 1              |
| 0.00    | 0.03 | 665.38                              | 69.16                               | 9.62         | 1387134_at            | S1fn3       | schlafen 3                                                                 |

|      |      |         |        |      |              |         |                                                                                |
|------|------|---------|--------|------|--------------|---------|--------------------------------------------------------------------------------|
| 0.00 | 0.02 | 156.40  | 16.56  | 9.45 | 1395076_at   | Runx1t1 | runt-related transcription factor 1; translocated to, 1 (cyclin D-related)     |
| 0.00 | 0.01 | 386.45  | 45.09  | 8.57 | 1384787_at   | Cd3g    | CD3 molecule, gamma polypeptide                                                |
| 0.00 | 0.01 | 42.17   | 5.09   | 8.29 | 1393791_at   | Trat1   | T cell receptor associated transmembrane adaptor 1                             |
| 0.00 | 0.01 | 384.94  | 46.51  | 8.28 | 1379791_at   | Cd3e    | CD3 molecule, epsilon polypeptide                                              |
| 0.00 | 0.00 | 300.27  | 37.21  | 8.07 | 1392171_at   | Chi3l1  | chitinase 3-like 1                                                             |
| 0.00 | 0.01 | 477.54  | 59.42  | 8.04 | 1377092_at   | NA      | NA                                                                             |
| 0.00 | 0.01 | 1353.06 | 169.48 | 7.98 | 1373667_at   | Ccbl1   | cysteine conjugate-beta lyase, cytoplasmic                                     |
| 0.00 | 0.01 | 242.45  | 30.39  | 7.98 | 1391979_at   | NA      | NA                                                                             |
| 0.00 | 0.01 | 320.04  | 41.78  | 7.66 | 1370987_at   | Spn     | sialophorin                                                                    |
| 0.00 | 0.03 | 1823.05 | 241.46 | 7.55 | 1386922_at   | Car2    | carbonic anhydrase II                                                          |
| 0.00 | 0.00 | 137.68  | 18.25  | 7.54 | 1370603_a_at | Ptprc   | protein tyrosine phosphatase, receptor type, C                                 |
| 0.00 | 0.01 | 220.70  | 29.87  | 7.39 | 1380077_at   | NA      | NA                                                                             |
| 0.00 | 0.02 | 184.42  | 24.98  | 7.38 | 1375917_at   | Lilrb4  | leukocyte immunoglobulin-like receptor, subfamily B, member 4                  |
| 0.00 | 0.03 | 2164.84 | 297.64 | 7.27 | 1367733_at   | Car2    | carbonic anhydrase II                                                          |
| 0.00 | 0.01 | 267.42  | 36.81  | 7.27 | 1382622_at   | Cst7    | cystatin F (leukocystatin)                                                     |
| 0.00 | 0.02 | 1026.26 | 142.62 | 7.20 | 1384329_at   | Prss22  | protease, serine, 22                                                           |
| 0.00 | 0.01 | 280.84  | 39.44  | 7.12 | 1387316_at   | Cxcl1   | chemokine (C-X-C motif) ligand 1 (melanoma growth stimulating activity, alpha) |
| 0.00 | 0.01 | 4595.03 | 645.64 | 7.12 | 1372013_at   | Ifitm1  | interferon induced transmembrane protein 1                                     |
| 0.00 | 0.02 | 255.94  | 35.99  | 7.11 | 1370777_at   | Ear11   | eosinophil-associated, ribonuclease A family, member 11                        |
| 0.00 | 0.00 | 794.25  | 112.94 | 7.03 | 1369964_at   | Coro1a  | coronin, actin binding protein 1A                                              |
| 0.00 | 0.00 | 298.41  | 43.57  | 6.85 | 1368723_at   | Lat     | linker for activation of T cells                                               |
| 0.00 | 0.01 | 390.87  | 57.82  | 6.76 | 1369029_at   | Plscr1  | phospholipid scramblase 1                                                      |
| 0.00 | 0.02 | 1120.46 | 167.48 | 6.69 | 1370056_at   | Ly6c    | Ly6-C antigen                                                                  |
| 0.00 | 0.00 | 554.15  | 84.45  | 6.56 | 1393140_at   | Zc3h12a | zinc finger CCCH type containing 12A                                           |
| 0.00 | 0.00 | 374.38  | 57.28  | 6.54 | 1390798_at   | Ptprc   | protein tyrosine phosphatase, receptor type, C                                 |
| 0.00 | 0.03 | 85.28   | 13.09  | 6.51 | 1397900_at   | NA      | NA                                                                             |
| 0.00 | 0.00 | 149.67  | 23.47  | 6.38 | 1398540_at   | Rgs1    | regulator of G-protein signaling 1                                             |
| 0.00 | 0.01 | 439.13  | 70.86  | 6.20 | 1368482_at   | Bcl2a1d | B-cell leukemia/lymphoma 2 related protein A1d                                 |
| 0.00 | 0.00 | 628.24  | 101.71 | 6.18 | 1368518_at   | Cd53    | Cd53 molecule                                                                  |
| 0.00 | 0.01 | 337.23  | 54.79  | 6.15 | 1373513_at   | NA      | NA                                                                             |
| 0.00 | 0.01 | 507.32  | 83.03  | 6.11 | 1389470_at   | Cfb     | complement factor B                                                            |
| 0.00 | 0.01 | 332.58  | 54.44  | 6.11 | 1389092_at   | Il2rg   | interleukin 2 receptor, gamma                                                  |
| 0.00 | 0.02 | 336.50  | 55.32  | 6.08 | 1368205_at   | Cfi     | complement factor I                                                            |
| 0.00 | 0.03 | 129.94  | 21.60  | 6.02 | 1370097_a_at | Cxcr4   | chemokine (C-X-C motif) receptor 4                                             |
| 0.00 | 0.02 | 273.58  | 45.75  | 5.98 | 1387472_at   | Cd3d    | CD3 molecule delta polypeptide                                                 |
| 0.00 | 0.00 | 309.67  | 51.85  | 5.97 | 1368826_at   | Comt    | catechol-O-methyltransferase                                                   |
| 0.00 | 0.01 | 531.08  | 89.07  | 5.96 | 1377671_at   | NA      | NA                                                                             |
| 0.00 | 0.00 | 299.68  | 51.09  | 5.87 | 1373661_a_at | Cxcr4   | chemokine (C-X-C motif) receptor 4                                             |
| 0.00 | 0.00 | 1184.39 | 203.43 | 5.82 | 1389210_at   | Lcp1    | lymphocyte cytosolic protein 1                                                 |
| 0.00 | 0.01 | 193.84  | 33.47  | 5.79 | 1397167_at   | NA      | NA                                                                             |
| 0.00 | 0.01 | 154.57  | 26.86  | 5.76 | 1376943_at   | NA      | NA                                                                             |
| 0.00 | 0.00 | 68.18   | 11.87  | 5.74 | 1383585_s_at | NA      | NA                                                                             |
| 0.00 | 0.00 | 484.90  | 85.19  | 5.69 | 1393329_at   | NA      | NA                                                                             |

|      |      |          |         |      |              |            |                                                                                         |
|------|------|----------|---------|------|--------------|------------|-----------------------------------------------------------------------------------------|
| 0.00 | 0.00 | 331.53   | 58.53   | 5.66 | 1393929_at   | Ccr6       | chemokine (C-C motif) receptor 6                                                        |
| 0.00 | 0.03 | 1363.82  | 240.81  | 5.66 | 1377185_at   | RGD1562622 | similar to RIKEN cDNA 6330442E10 gene                                                   |
| 0.00 | 0.01 | 201.18   | 35.87   | 5.61 | 1368783_at   | Icos       | inducible T-cell co-stimulator                                                          |
| 0.00 | 0.01 | 56.53    | 10.17   | 5.56 | 1386052_at   | Il7r       | interleukin 7 receptor                                                                  |
| 0.00 | 0.00 | 215.21   | 40.07   | 5.37 | 1379766_at   | Sla        | src-like adaptor                                                                        |
| 0.00 | 0.01 | 267.52   | 50.87   | 5.26 | 1389244_x_at | Cxcr4      | chemokine (C-X-C motif) receptor 4                                                      |
| 0.00 | 0.03 | 558.54   | 106.84  | 5.23 | 1388773_at   | Tnfaip2    | tumor necrosis factor, alpha-induced protein 2                                          |
| 0.00 | 0.03 | 234.87   | 45.07   | 5.21 | 1378193_at   | Ms4a7      | membrane-spanning 4-domains, subfamily A, member 7                                      |
| 0.00 | 0.01 | 315.91   | 61.22   | 5.16 | 1394585_at   | NA         | NA                                                                                      |
| 0.00 | 0.03 | 134.09   | 26.07   | 5.14 | 1376840_at   | NA         | NA                                                                                      |
| 0.00 | 0.02 | 116.34   | 22.62   | 5.14 | 1383248_at   | Fmo5       | flavin containing monooxygenase 5                                                       |
| 0.00 | 0.01 | 75.10    | 14.64   | 5.13 | 1387687_at   | Igsf6      | immunoglobulin superfamily, member 6                                                    |
| 0.00 | 0.03 | 16518.39 | 3222.06 | 5.13 | 1368494_at   | S100a8     | S100 calcium binding protein A8                                                         |
| 0.00 | 0.01 | 100.39   | 19.59   | 5.12 | 1389997_at   | Cd3e       | CD3 molecule, epsilon polypeptide                                                       |
| 0.00 | 0.01 | 340.19   | 66.66   | 5.10 | 1393347_at   | Itgal      | integrin alpha L                                                                        |
| 0.00 | 0.03 | 174.69   | 34.46   | 5.07 | 1387111_at   | Ddah1      | dimethylarginine dimethylaminohydrolase 1                                               |
| 0.00 | 0.00 | 1015.08  | 201.13  | 5.05 | 1372585_at   | RGD1566254 | RGD1566254                                                                              |
| 0.00 | 0.01 | 46.83    | 9.30    | 5.04 | 1386695_at   | NA         | NA                                                                                      |
| 0.00 | 0.02 | 237.24   | 47.40   | 5.01 | 1387946_at   | Lgals3bp   | lectin, galactoside-binding, soluble, 3 binding protein                                 |
| 0.00 | 0.02 | 662.42   | 133.55  | 4.96 | 1389006_at   | NA         | NA                                                                                      |
| 0.00 | 0.00 | 1621.55  | 329.45  | 4.92 | 1375808_at   | Prss27     | protease, serine 27                                                                     |
| 0.00 | 0.00 | 436.39   | 88.88   | 4.91 | 1383320_at   | Lck        | lymphocyte-specific protein tyrosine kinase                                             |
| 0.00 | 0.01 | 197.72   | 40.60   | 4.87 | 1368558_s_at | Aif1       | allograft inflammatory factor 1                                                         |
| 0.00 | 0.00 | 35.38    | 7.28    | 4.86 | 1385215_at   | Runx1t1    | runt-related transcription factor 1; translocated to, 1 (cyclin D-related)              |
| 0.00 | 0.02 | 77.16    | 15.97   | 4.83 | 1397859_x_at | RT1-A2     | RT1 class Ia, locus A2                                                                  |
| 0.00 | 0.01 | 78.83    | 16.55   | 4.76 | 1381771_at   | NA         | NA                                                                                      |
| 0.00 | 0.01 | 146.42   | 31.18   | 4.70 | 1384837_at   | Cd69       | Cd69 molecule                                                                           |
| 0.00 | 0.01 | 54.09    | 11.61   | 4.66 | 1369105_a_at | Pkib       | protein kinase inhibitor beta, (cAMP-dependent, catalytic) inhibitor beta               |
| 0.00 | 0.00 | 253.32   | 54.98   | 4.61 | 1368139_s_at | Alpl       | alkaline phosphatase, liver/bone/kidney                                                 |
| 0.00 | 0.01 | 612.17   | 132.99  | 4.60 | 1372404_at   | Rac2       | ras-related C3 botulinum toxin substrate 2 (rho family, small GTP binding protein Rac2) |
| 0.00 | 0.01 | 2358.78  | 516.46  | 4.57 | 1370822_at   | RT1-Ba     | RT1 class II, locus Ba                                                                  |
| 0.00 | 0.02 | 96.07    | 21.07   | 4.56 | 1380230_at   | NA         | NA                                                                                      |
| 0.00 | 0.01 | 1885.91  | 413.89  | 4.56 | 1370383_s_at | RT1-Db1    | RT1 class II, locus Db1                                                                 |
| 0.00 | 0.02 | 211.72   | 47.02   | 4.50 | 1368492_at   | Ptgds2     | prostaglandin D2 synthase 2, hematopoietic                                              |
| 0.00 | 0.02 | 369.51   | 82.43   | 4.48 | 1376710_at   | NA         | NA                                                                                      |
| 0.00 | 0.03 | 6189.56  | 1404.50 | 4.41 | 1387995_a_at | Ifitm3     | interferon induced transmembrane protein 3                                              |
| 0.00 | 0.01 | 640.16   | 145.65  | 4.40 | 1368006_at   | Laptm5     | lysosomal multispinning membrane protein 5                                              |
| 0.00 | 0.03 | 306.66   | 69.78   | 4.39 | 1390687_at   | Plek       | pleckstrin                                                                              |
| 0.00 | 0.02 | 216.39   | 50.17   | 4.31 | 1368914_at   | Runx1      | runt related transcription factor 1                                                     |
| 0.00 | 0.01 | 351.86   | 81.76   | 4.30 | 1385440_at   | Hcst       | hematopoietic cell signal transducer                                                    |
| 0.00 | 0.01 | 165.64   | 38.56   | 4.30 | 1382167_at   | Sit1       | signaling threshold regulating transmembrane adaptor 1                                  |

|      |      |         |         |      |              |         |                                                                                          |
|------|------|---------|---------|------|--------------|---------|------------------------------------------------------------------------------------------|
| 0.00 | 0.03 | 272.87  | 64.12   | 4.26 | 1372852_at   | Ptprcap | protein tyrosine phosphatase, receptor type, C-associated protein                        |
| 0.00 | 0.01 | 4651.24 | 1094.14 | 4.25 | 1373718_at   | Tubb2b  | tubulin, beta 2b                                                                         |
| 0.00 | 0.02 | 142.86  | 33.76   | 4.23 | 1368061_at   | Kcnh1   | potassium voltage-gated channel, subfamily H (eag-related), member 1                     |
| 0.00 | 0.01 | 66.60   | 15.92   | 4.18 | 1370769_a_at | Icos    | inducible T-cell co-stimulator                                                           |
| 0.00 | 0.02 | 59.18   | 14.22   | 4.16 | 1368782_at   | Sstr2   | somatostatin receptor 2                                                                  |
| 0.00 | 0.01 | 208.78  | 50.31   | 4.15 | 1369190_at   | Cd2     | Cd2 molecule                                                                             |
| 0.00 | 0.01 | 31.59   | 7.63    | 4.14 | 1394051_at   | P2ry10  | purinergic receptor P2Y, G-protein coupled 10                                            |
| 0.00 | 0.02 | 111.47  | 27.16   | 4.10 | 1379499_at   | Ltb     | lymphotoxin beta (TNF superfamily, member 3)                                             |
| 0.00 | 0.01 | 229.42  | 56.18   | 4.08 | 1370382_at   | RT1-Db1 | RT1 class II, locus Db1                                                                  |
| 0.00 | 0.02 | 94.56   | 23.29   | 4.06 | 1394264_at   | Chst5   | carbohydrate (N-acetylglucosamine 6-O) sulfotransferase 5                                |
| 0.00 | 0.02 | 458.68  | 113.10  | 4.06 | 1379344_at   | Cybb    | cytochrome b-245, beta polypeptide                                                       |
| 0.00 | 0.01 | 151.62  | 37.86   | 4.00 | 1370090_at   | Lcp2    | lymphocyte cytosolic protein 2                                                           |
| 0.00 | 0.02 | 191.69  | 48.23   | 3.97 | 1392444_at   | Chst5   | carbohydrate (N-acetylglucosamine 6-O) sulfotransferase 5                                |
| 0.00 | 0.02 | 346.99  | 87.41   | 3.97 | 1373006_at   | Tmem171 | transmembrane protein 171                                                                |
| 0.00 | 0.02 | 336.56  | 85.18   | 3.95 | 1370186_at   | Psmb9   | proteasome (prosome, macropain) subunit, beta type 9 (large multifunctional peptidase 2) |
| 0.00 | 0.03 | 88.67   | 22.46   | 3.95 | 1387269_s_at | Plaur   | plasminogen activator, urokinase receptor                                                |
| 0.00 | 0.00 | 181.72  | 46.31   | 3.92 | 1389678_at   | NA      | NA                                                                                       |
| 0.00 | 0.01 | 83.20   | 21.41   | 3.89 | 1383661_at   | NA      | NA                                                                                       |
| 0.00 | 0.01 | 103.73  | 26.74   | 3.88 | 1384939_at   | Il18r1  | interleukin 18 receptor 1                                                                |
| 0.00 | 0.01 | 62.66   | 16.20   | 3.87 | 1393649_at   | NA      | NA                                                                                       |
| 0.00 | 0.02 | 55.16   | 14.26   | 3.87 | 1382507_at   | Cd96    | CD96 molecule                                                                            |
| 0.00 | 0.01 | 174.54  | 45.17   | 3.86 | 1368555_at   | Cd37    | CD37 molecule                                                                            |
| 0.00 | 0.01 | 233.14  | 60.42   | 3.86 | 1392082_a_at | Cd7     | Cd7 molecule                                                                             |
| 0.00 | 0.02 | 4622.69 | 1205.11 | 3.84 | 1370883_at   | H2-Ea   | histocompatibility 2, class II antigen E alpha                                           |
| 0.00 | 0.02 | 102.60  | 26.88   | 3.82 | 1368412_a_at | Ptpro   | protein tyrosine phosphatase, receptor type, O                                           |
| 0.00 | 0.01 | 286.38  | 75.13   | 3.81 | 1385832_s_at | Sash3   | SAM and SH3 domain containing 3                                                          |
| 0.00 | 0.01 | 3740.32 | 990.94  | 3.77 | 1370172_at   | Sod2    | superoxide dismutase 2, mitochondrial                                                    |
| 0.00 | 0.00 | 226.19  | 60.26   | 3.75 | 1385641_at   | NA      | NA                                                                                       |
| 0.00 | 0.02 | 221.20  | 59.00   | 3.75 | 1384544_at   | Pon3    | paraoxonase 3                                                                            |
| 0.00 | 0.01 | 134.63  | 35.92   | 3.75 | 1393901_at   | Runx1t1 | runt-related transcription factor 1; translocated to, 1 (cyclin D-related)               |
| 0.00 | 0.02 | 74.95   | 20.06   | 3.74 | 1368693_at   | Fgr     | Gardner-Rasheed feline sarcoma viral (v-fgr) oncogene homolog                            |
| 0.00 | 0.02 | 1363.94 | 365.31  | 3.73 | 1370968_at   | Nfkb1   | nuclear factor of kappa light polypeptide gene enhancer in B-cells 1                     |
| 0.00 | 0.02 | 155.00  | 41.85   | 3.70 | 1377994_at   | NA      | NA                                                                                       |
| 0.00 | 0.00 | 798.30  | 216.37  | 3.69 | 1371447_at   | Plac8   | placenta-specific 8                                                                      |
| 0.00 | 0.04 | 253.62  | 69.26   | 3.66 | 1370173_at   | Sod2    | superoxide dismutase 2, mitochondrial                                                    |
| 0.00 | 0.01 | 1340.69 | 366.33  | 3.66 | 1379371_at   | NA      | NA                                                                                       |
| 0.00 | 0.02 | 199.94  | 55.30   | 3.62 | 1373932_at   | NA      | NA                                                                                       |
| 0.00 | 0.02 | 311.90  | 86.65   | 3.60 | 1390866_at   | NA      | NA                                                                                       |
| 0.00 | 0.01 | 3047.79 | 851.70  | 3.58 | 1367846_at   | S100a4  | S100 calcium-binding protein A4                                                          |
| 0.00 | 0.02 | 229.82  | 64.27   | 3.58 | 1378633_at   | Lpxn    | leupaxin                                                                                 |
| 0.00 | 0.01 | 260.48  | 73.43   | 3.55 | 1389553_at   | Clec4a3 | C-type lectin domain family 4, member a3                                                 |

|      |      |         |         |      |              |           |                                                                                          |
|------|------|---------|---------|------|--------------|-----------|------------------------------------------------------------------------------------------|
| 0.00 | 0.00 | 1555.25 | 439.27  | 3.54 | 1383658_at   | Laptm5    | lysosomal multispanning membrane protein 5                                               |
| 0.00 | 0.03 | 177.20  | 50.62   | 3.50 | 1393108_at   | NA        | NA                                                                                       |
| 0.00 | 0.03 | 178.49  | 51.08   | 3.49 | 1382026_at   | Arhgap9   | Rho GTPase activating protein 9                                                          |
| 0.00 | 0.01 | 967.31  | 277.79  | 3.48 | 1368655_at   | Srgn      | serglycin                                                                                |
| 0.00 | 0.01 | 99.70   | 28.65   | 3.48 | 1386410_at   | NA        | NA                                                                                       |
| 0.00 | 0.02 | 74.69   | 21.52   | 3.47 | 1378629_at   | Satb1     | SATB homeobox 1                                                                          |
| 0.00 | 0.01 | 70.49   | 20.34   | 3.47 | 1394122_at   | Rhoh      | ras homolog gene family, member H                                                        |
| 0.00 | 0.01 | 228.53  | 66.05   | 3.46 | 1392722_at   | Dapp1     | dual adaptor of phosphotyrosine and 3-phosphoinositides                                  |
| 0.00 | 0.02 | 101.16  | 29.38   | 3.44 | 1378413_at   | NA        | NA                                                                                       |
| 0.00 | 0.00 | 192.44  | 55.98   | 3.44 | 1378377_at   | Dapp1     | dual adaptor of phosphotyrosine and 3-phosphoinositides                                  |
| 0.00 | 0.03 | 62.65   | 18.26   | 3.43 | 1379626_at   | Satb1     | SATB homeobox 1                                                                          |
| 0.00 | 0.01 | 4918.22 | 1435.37 | 3.43 | 1367679_at   | Cd74      | Cd74 molecule, major histocompatibility complex, class II invariant chain                |
| 0.00 | 0.01 | 871.91  | 256.68  | 3.40 | 1387343_at   | Cebpd     | CCAAT/enhancer binding protein (C/EBP), delta                                            |
| 0.00 | 0.02 | 117.90  | 34.79   | 3.39 | 1398348_at   | NA        | NA                                                                                       |
| 0.00 | 0.01 | 602.74  | 178.49  | 3.38 | 1374730_at   | Tyrobp    | Tyro protein tyrosine kinase binding protein                                             |
| 0.00 | 0.03 | 188.44  | 56.18   | 3.35 | 1368374_a_at | Ggt1      | gamma-glutamyltransferase 1                                                              |
| 0.00 | 0.00 | 890.10  | 266.52  | 3.34 | 1368490_at   | Cd14      | CD14 molecule                                                                            |
| 0.00 | 0.01 | 166.14  | 49.81   | 3.34 | 1372200_at   | Gpsm3     | G-protein signaling modulator 3 (AGS3-like, C. elegans)                                  |
| 0.00 | 0.03 | 268.37  | 80.46   | 3.34 | 1368503_at   | Gch1      | GTP cyclohydrolase 1                                                                     |
| 0.00 | 0.02 | 489.49  | 147.13  | 3.33 | 1379677_at   | Tnfsf13   | tumor necrosis factor (ligand) superfamily, member 13                                    |
| 0.00 | 0.02 | 119.60  | 36.09   | 3.31 | 1389413_at   | Evi2a     | ecotropic viral integration site 2A                                                      |
| 0.00 | 0.00 | 305.69  | 92.35   | 3.31 | 1392716_at   | NA        | NA                                                                                       |
| 0.00 | 0.02 | 116.30  | 35.21   | 3.30 | 1382566_at   | Il7r      | interleukin 7 receptor                                                                   |
| 0.00 | 0.03 | 230.45  | 69.82   | 3.30 | 1382692_at   | Clec7a    | C-type lectin domain family 7, member a                                                  |
| 0.00 | 0.01 | 145.57  | 44.31   | 3.29 | 1377195_at   | NA        | NA                                                                                       |
| 0.00 | 0.01 | 76.36   | 23.26   | 3.28 | 1378915_x_at | LOC308990 | hypothetical protein LOC308990                                                           |
| 0.00 | 0.03 | 498.26  | 152.26  | 3.27 | 1374119_at   | Elf3      | E74-like factor 3                                                                        |
| 0.00 | 0.02 | 395.38  | 120.87  | 3.27 | 1367786_at   | Psmb8     | proteasome (prosome, macropain) subunit, beta type 8 (large multifunctional peptidase 7) |
| 0.00 | 0.02 | 96.25   | 29.45   | 3.27 | 1398727_at   | NA        | NA                                                                                       |
| 0.00 | 0.01 | 134.72  | 41.29   | 3.26 | 1390797_at   | Lcp2      | lymphocyte cytosolic protein 2                                                           |
| 0.00 | 0.01 | 660.33  | 202.40  | 3.26 | 1370882_at   | Hla-dmb   | major histocompatibility complex, class II, DM beta                                      |
| 0.00 | 0.01 | 1037.73 | 320.04  | 3.24 | 1371659_at   | Rhoc      | ras homolog gene family, member C                                                        |
| 0.00 | 0.02 | 477.87  | 147.64  | 3.24 | 1377353_a_at | Tnfsf13   | tumor necrosis factor (ligand) superfamily, member 13                                    |
| 0.00 | 0.02 | 321.11  | 99.22   | 3.24 | 1376788_at   | Dapk1     | death associated protein kinase 1                                                        |
| 0.00 | 0.03 | 121.62  | 37.84   | 3.21 | 1376394_at   | Clec9a    | C-type lectin domain family 9, member a                                                  |
| 0.00 | 0.03 | 88.22   | 27.51   | 3.21 | 1392280_at   | Tlr2      | toll-like receptor 2                                                                     |
| 0.00 | 0.02 | 414.11  | 129.66  | 3.19 | 1374838_at   | Sp140     | SP140 nuclear body protein                                                               |
| 0.00 | 0.01 | 124.21  | 39.13   | 3.17 | 1385557_at   | NA        | NA                                                                                       |
| 0.00 | 0.03 | 29.75   | 9.44    | 3.15 | 1377190_at   | NA        | NA                                                                                       |
| 0.00 | 0.03 | 32.86   | 10.46   | 3.14 | 1372702_at   | PRP-2     | proline-rich protein                                                                     |
| 0.00 | 0.02 | 35.15   | 11.19   | 3.14 | 1387459_at   | Pkib      | protein kinase inhibitor beta, (cAMP-dependent, catalytic) inhibitor beta                |

|      |      |         |        |      |              |            |                                                                                             |
|------|------|---------|--------|------|--------------|------------|---------------------------------------------------------------------------------------------|
| 0.00 | 0.04 | 49.96   | 15.94  | 3.14 | 1380425_at   | Rnasel     | ribonuclease L (2@#%&,5@#%&-oligoisoadenylate synthetase-dependent)                         |
| 0.00 | 0.02 | 157.91  | 50.37  | 3.14 | 1393049_at   | Myo1g      | myosin IG                                                                                   |
| 0.00 | 0.02 | 173.90  | 55.67  | 3.12 | 1374157_at   | Pde4b      | phosphodiesterase 4B, cAMP specific                                                         |
| 0.00 | 0.01 | 95.18   | 30.47  | 3.12 | 1392794_at   | NA         | NA                                                                                          |
| 0.00 | 0.02 | 816.12  | 262.45 | 3.11 | 1373575_at   | Fcer1g     | Fc fragment of IgE, high affinity I, receptor for; gamma polypeptide                        |
| 0.00 | 0.01 | 159.56  | 51.66  | 3.09 | 1369204_at   | Hck        | hemopoietic cell kinase                                                                     |
| 0.00 | 0.02 | 81.97   | 26.58  | 3.08 | 1390849_at   | NA         | NA                                                                                          |
| 0.00 | 0.02 | 185.99  | 60.93  | 3.05 | 1384968_at   | Sh3bp2     | SH3-domain binding protein 2                                                                |
| 0.00 | 0.03 | 313.89  | 103.08 | 3.05 | 1369705_at   | Slc6a20    | solute carrier family 6 (neurotransmitter transporter), member 20                           |
| 0.00 | 0.03 | 226.63  | 74.43  | 3.05 | 1398350_at   | Basp1      | brain abundant, membrane attached signal protein 1                                          |
| 0.00 | 0.02 | 223.43  | 74.29  | 3.01 | 1368813_at   | Cebpd      | CCAAT/enhancer binding protein (C/EBP), delta                                               |
| 0.00 | 0.01 | 54.58   | 18.17  | 3.00 | 1398644_at   | Plxnc1     | plexin C1                                                                                   |
| 0.00 | 0.02 | 39.99   | 13.33  | 3.00 | 1381357_at   | Ptpn22     | protein tyrosine phosphatase, non-receptor type 22 (lymphoid)                               |
| 0.00 | 0.02 | 127.53  | 42.52  | 3.00 | 1382442_at   | Sep-06     | septin 6                                                                                    |
| 0.00 | 0.02 | 118.06  | 39.56  | 2.98 | 1394673_at   | LOC687856  | similar to Myeloid cell surface antigen CD33 precursor (Siglec-3)                           |
| 0.00 | 0.01 | 254.14  | 85.23  | 2.98 | 1390946_at   | NA         | NA                                                                                          |
| 0.00 | 0.02 | 1653.67 | 555.44 | 2.98 | 1367632_at   | Glul       | glutamate-ammonia ligase (glutamine synthetase)                                             |
| 0.00 | 0.02 | 261.37  | 88.22  | 2.96 | 1379911_at   | Dapk1      | death associated protein kinase 1                                                           |
| 0.00 | 0.01 | 65.71   | 22.42  | 2.93 | 1376327_at   | Tnfrsf14   | tumor necrosis factor receptor superfamily, member 14 (herpesvirus entry mediator)          |
| 0.00 | 0.03 | 316.16  | 107.89 | 2.93 | 1368207_at   | Fxyd5      | FXFD domain-containing ion transport regulator 5                                            |
| 0.00 | 0.03 | 204.92  | 70.11  | 2.92 | 1374544_at   | MGC112715  | platelet receptor Gi24                                                                      |
| 0.00 | 0.02 | 141.75  | 48.50  | 2.92 | 1379381_at   | NA         | NA                                                                                          |
| 0.00 | 0.02 | 142.00  | 48.60  | 2.92 | 1379387_at   | NA         | NA                                                                                          |
| 0.00 | 0.02 | 37.38   | 12.79  | 2.92 | 1396147_at   | NA         | NA                                                                                          |
| 0.00 | 0.01 | 525.57  | 180.39 | 2.91 | 1388131_at   | Tubb2b     | tubulin, beta 2b                                                                            |
| 0.00 | 0.02 | 48.66   | 16.78  | 2.90 | 1367627_at   | Gatm       | glycine amidinotransferase (L-arginine:glycine amidinotransferase)                          |
| 0.00 | 0.01 | 493.73  | 170.51 | 2.90 | 1370219_at   | Cyba       | cytochrome b-245, alpha polypeptide                                                         |
| 0.00 | 0.03 | 131.45  | 45.89  | 2.86 | 1367861_at   | Evl        | Enah/Vasp-like                                                                              |
| 0.00 | 0.02 | 258.86  | 90.81  | 2.85 | 1395836_at   | Odz2       | odz, odd Oz/ten-m homolog 2 (Drosophila)                                                    |
| 0.00 | 0.03 | 73.25   | 25.75  | 2.84 | 1398484_at   | RGD1308221 | similar to TBC1 domain family, member 8 (with GRAM domain); vascular Rab-GAP/TBC-containing |
| 0.00 | 0.00 | 240.08  | 84.48  | 2.84 | 1383131_at   | Itgb2      | integrin beta 2                                                                             |
| 0.00 | 0.02 | 178.04  | 62.94  | 2.83 | 1397096_at   | NA         | NA                                                                                          |
| 0.00 | 0.02 | 129.05  | 45.73  | 2.82 | 1388485_at   | Cxcl14     | chemokine (C-X-C motif) ligand 14                                                           |
| 0.00 | 0.01 | 77.47   | 27.51  | 2.82 | 1382663_at   | Batf       | basic leucine zipper transcription factor, ATF-like                                         |
| 0.00 | 0.03 | 930.77  | 330.65 | 2.81 | 1388596_at   | Cot11      | coactosin-like 1 (Dictyostelium)                                                            |
| 0.00 | 0.01 | 240.81  | 86.04  | 2.80 | 1374310_at   | Ppm1j      | protein phosphatase 1J                                                                      |
| 0.00 | 0.00 | 223.91  | 80.04  | 2.80 | 1376766_at   | Fmn11      | formin-like 1                                                                               |
| 0.00 | 0.03 | 470.60  | 170.36 | 2.76 | 1387450_at   | Tgfa       | transforming growth factor alpha                                                            |
| 0.00 | 0.03 | 121.34  | 44.08  | 2.75 | 1370585_a_at | Prkcb      | protein kinase C, beta                                                                      |
| 0.00 | 0.02 | 22.18   | 8.07   | 2.75 | 1369290_at   | Ccr5       | chemokine (C-C motif) receptor 5                                                            |

|      |      |         |        |      |              |            |                                                                    |
|------|------|---------|--------|------|--------------|------------|--------------------------------------------------------------------|
| 0.00 | 0.02 | 661.70  | 241.21 | 2.74 | 1376969_at   | NA         | NA                                                                 |
| 0.00 | 0.02 | 283.02  | 103.64 | 2.73 | 1392107_at   | Sbno2      | strawberry notch homolog 2 (Drosophila)                            |
| 0.00 | 0.02 | 273.68  | 100.28 | 2.73 | 1368073_at   | Irf1       | interferon regulatory factor 1                                     |
| 0.00 | 0.02 | 72.51   | 26.65  | 2.72 | 1369181_at   | Cybb       | cytochrome b-245, beta polypeptide                                 |
| 0.00 | 0.02 | 842.66  | 310.15 | 2.72 | 1370344_at   | Hspa4      | heat shock protein 4                                               |
| 0.00 | 0.03 | 112.25  | 41.66  | 2.69 | 1378314_at   | NA         | NA                                                                 |
| 0.00 | 0.04 | 105.71  | 39.49  | 2.68 | 1369294_at   | Bst1       | bone marrow stromal cell antigen 1                                 |
| 0.00 | 0.01 | 340.66  | 127.74 | 2.67 | 1373065_at   | Ptpn18     | protein tyrosine phosphatase, non-receptor type 18                 |
| 0.00 | 0.01 | 99.55   | 37.35  | 2.67 | 1395442_at   | NA         | NA                                                                 |
| 0.00 | 0.02 | 121.14  | 45.63  | 2.65 | 1392554_a_at | NA         | NA                                                                 |
| 0.00 | 0.03 | 337.87  | 127.62 | 2.65 | 1370885_at   | Ctsz       | cathepsin Z                                                        |
| 0.00 | 0.02 | 137.71  | 52.14  | 2.64 | 1370265_at   | Arrb2      | arrestin, beta 2                                                   |
| 0.00 | 0.02 | 209.75  | 79.68  | 2.63 | 1368521_at   | Napsa      | napsin A aspartic peptidase                                        |
| 0.00 | 0.01 | 64.02   | 24.38  | 2.63 | 1382346_at   | NA         | NA                                                                 |
| 0.00 | 0.02 | 135.73  | 51.98  | 2.61 | 1367936_at   | Stk10      | serine/threonine kinase 10                                         |
| 0.00 | 0.02 | 17.53   | 6.73   | 2.60 | 1391058_at   | RGD1310958 | similar to RIKEN cDNA C130090K23                                   |
| 0.00 | 0.02 | 52.15   | 20.07  | 2.60 | 1395183_at   | NA         | NA                                                                 |
| 0.00 | 0.03 | 56.92   | 21.93  | 2.60 | 1387394_at   | Il2rb      | interleukin 2 receptor, beta                                       |
| 0.00 | 0.03 | 171.43  | 66.45  | 2.58 | 1393400_at   | Zap70      | zeta-chain (TCR) associated protein kinase                         |
| 0.00 | 0.01 | 77.74   | 30.23  | 2.57 | 1368735_a_at | Trpv2      | transient receptor potential cation channel, subfamily V, member 2 |
| 0.00 | 0.01 | 207.59  | 80.76  | 2.57 | 1390529_at   | Cd83       | CD83 molecule                                                      |
| 0.00 | 0.02 | 141.50  | 55.08  | 2.57 | 1380537_at   | Nckap1l    | NCK associated protein 1 like                                      |
| 0.00 | 0.03 | 195.83  | 76.48  | 2.56 | 1376624_at   | NA         | NA                                                                 |
| 0.00 | 0.02 | 177.76  | 69.55  | 2.56 | 1380520_at   | NA         | NA                                                                 |
| 0.00 | 0.03 | 742.36  | 291.26 | 2.55 | 1376076_at   | NA         | NA                                                                 |
| 0.00 | 0.01 | 520.45  | 204.85 | 2.54 | 1372691_at   | Upp1       | uridine phosphorylase 1                                            |
| 0.00 | 0.00 | 312.86  | 123.20 | 2.54 | 1381193_at   | LOC317456  | hypothetical LOC317456                                             |
| 0.00 | 0.01 | 323.63  | 127.89 | 2.53 | 1391027_at   | NA         | NA                                                                 |
| 0.00 | 0.03 | 979.64  | 387.65 | 2.53 | 1373881_at   | Arhgdib    | Rho, GDP dissociation inhibitor (GDI) beta                         |
| 0.00 | 0.02 | 322.37  | 127.96 | 2.52 | 1370834_at   | Hs3st1     | heparan sulfate (glucosamine) 3-O-sulfotransferase 1               |
| 0.00 | 0.01 | 36.22   | 14.38  | 2.52 | 1393926_at   | Stap1      | signal transducing adaptor family member 1                         |
| 0.00 | 0.03 | 123.40  | 49.05  | 2.52 | 1377286_at   | Gimap4     | GTPase, IMAP family member 4                                       |
| 0.00 | 0.01 | 48.07   | 19.14  | 2.51 | 1370483_at   | Cd244      | Cd244 molecule, natural killer cell receptor 2B4                   |
| 0.00 | 0.02 | 34.57   | 13.80  | 2.50 | 1373751_at   | NA         | NA                                                                 |
| 0.00 | 0.03 | 1278.30 | 510.47 | 2.50 | 1392894_at   | Fgl2       | fibrinogen-like 2                                                  |
| 0.00 | 0.03 | 46.90   | 18.83  | 2.49 | 1378843_at   | NA         | NA                                                                 |
| 0.00 | 0.02 | 634.78  | 256.80 | 2.47 | 1373037_at   | Ube2l6     | ubiquitin-conjugating enzyme E2L 6                                 |
| 0.00 | 0.02 | 395.81  | 160.15 | 2.47 | 1373088_at   | LOC682888  | hypothetical protein LOC682888                                     |
| 0.00 | 0.03 | 101.80  | 41.31  | 2.46 | 1380728_at   | NA         | NA                                                                 |
| 0.00 | 0.03 | 83.92   | 34.16  | 2.46 | 1378617_at   | Trerf1     | transcriptional regulating factor 1                                |
| 0.00 | 0.02 | 75.03   | 30.58  | 2.45 | 1377023_at   | Dusp2      | dual specificity phosphatase 2                                     |
| 0.00 | 0.02 | 115.30  | 47.07  | 2.45 | 1376259_at   | Prkcq      | protein kinase C, theta                                            |
| 0.00 | 0.03 | 345.11  | 140.90 | 2.45 | 1387030_at   | Abcc5      | ATP-binding cassette, sub-family C (CFTR/MRP), member 5            |
| 0.00 | 0.02 | 145.25  | 59.51  | 2.44 | 1384298_at   | Myo1f      | myosin IF                                                          |
| 0.00 | 0.03 | 61.50   | 25.22  | 2.44 | 1374976_a_at | Soat1      | sterol O-acyltransferase 1                                         |

|      |      |         |        |      |              |           |                                                                                          |
|------|------|---------|--------|------|--------------|-----------|------------------------------------------------------------------------------------------|
| 0.00 | 0.01 | 67.26   | 27.59  | 2.44 | 1378418_at   | Tfab      | TRAF-interacting protein with forkhead-associated domain, family member B                |
| 0.00 | 0.03 | 231.97  | 95.84  | 2.42 | 1383786_at   | Rab32     | RAB32, member RAS oncogene family                                                        |
| 0.00 | 0.03 | 119.83  | 49.55  | 2.42 | 1378443_at   | Slamf9    | SLAM family member 9                                                                     |
| 0.00 | 0.02 | 84.73   | 35.12  | 2.41 | 1372326_at   | Slc2a3    | solute carrier family 2 (facilitated glucose transporter), member 3                      |
| 0.00 | 0.01 | 148.82  | 61.88  | 2.40 | 1377908_at   | NA        | NA                                                                                       |
| 0.00 | 0.02 | 74.26   | 31.14  | 2.38 | 1384896_at   | NA        | NA                                                                                       |
| 0.00 | 0.01 | 837.15  | 351.29 | 2.38 | 1391719_at   | NA        | NA                                                                                       |
| 0.00 | 0.02 | 199.27  | 83.64  | 2.38 | 1392407_at   | NA        | NA                                                                                       |
| 0.00 | 0.03 | 56.67   | 23.86  | 2.38 | 1390364_at   | NA        | NA                                                                                       |
| 0.00 | 0.02 | 261.79  | 110.52 | 2.37 | 1373504_at   | Glpr1     | GLI pathogenesis-related 1                                                               |
| 0.00 | 0.03 | 38.95   | 16.47  | 2.36 | 1384027_a_at | NA        | NA                                                                                       |
| 0.00 | 0.02 | 166.79  | 70.58  | 2.36 | 1370082_at   | Tgfb1     | transforming growth factor, beta 1                                                       |
| 0.00 | 0.03 | 122.07  | 51.69  | 2.36 | 1368008_at   | Prom1     | prominin 1                                                                               |
| 0.00 | 0.03 | 514.46  | 217.87 | 2.36 | 1368851_at   | Ets1      | v-ets erythroblastosis virus E26 oncogene homolog 1 (avian)                              |
| 0.00 | 0.01 | 195.28  | 83.00  | 2.35 | 1378700_at   | NA        | NA                                                                                       |
| 0.00 | 0.02 | 152.03  | 64.84  | 2.34 | 1393280_at   | Ly86      | lymphocyte antigen 86                                                                    |
| 0.00 | 0.03 | 234.13  | 99.99  | 2.34 | 1379295_at   | Gngt2     | guanine nucleotide binding protein (G protein), gamma transducing activity polypeptide 2 |
| 0.00 | 0.03 | 220.57  | 94.42  | 2.34 | 1380450_at   | Bzrap1    | benzodiazapine receptor associated protein 1                                             |
| 0.00 | 0.00 | 111.45  | 47.71  | 2.34 | 1385888_at   | NA        | NA                                                                                       |
| 0.00 | 0.02 | 75.72   | 32.42  | 2.34 | 1390556_at   | NA        | NA                                                                                       |
| 0.00 | 0.00 | 48.52   | 20.80  | 2.33 | 1379768_at   | NA        | NA                                                                                       |
| 0.00 | 0.02 | 93.83   | 40.26  | 2.33 | 1382601_at   | NA        | NA                                                                                       |
| 0.00 | 0.02 | 72.81   | 31.36  | 2.32 | 1395301_x_at | LOC685157 | similar to paired immunoglobulin-like type 2 receptor beta                               |
| 0.00 | 0.01 | 136.55  | 58.82  | 2.32 | 1387198_at   | Inpp5d    | inositol polyphosphate-5-phosphatase D                                                   |
| 0.00 | 0.01 | 282.17  | 121.98 | 2.31 | 1377239_at   | Apbb1ip   | amyloid beta (A4) precursor protein-binding, family B, member 1 interacting protein      |
| 0.00 | 0.02 | 406.21  | 175.89 | 2.31 | 1370348_at   | Ninj1     | ninjurin 1                                                                               |
| 0.00 | 0.03 | 95.31   | 41.29  | 2.31 | 1373754_at   | NA        | NA                                                                                       |
| 0.00 | 0.03 | 327.00  | 141.89 | 2.30 | 1388673_at   | Lsp1      | lymphocyte-specific protein 1                                                            |
| 0.00 | 0.01 | 107.54  | 46.82  | 2.30 | 1382181_at   | Pion      | pigeon homolog (Drosophila)                                                              |
| 0.00 | 0.03 | 151.58  | 66.19  | 2.29 | 1384013_at   | NA        | NA                                                                                       |
| 0.00 | 0.02 | 472.68  | 206.71 | 2.29 | 1384507_at   | Fam105a   | family with sequence similarity 105, member A                                            |
| 0.00 | 0.02 | 119.80  | 52.61  | 2.28 | 1377882_at   | Flt3      | fms-related tyrosine kinase 3                                                            |
| 0.00 | 0.02 | 46.82   | 20.61  | 2.27 | 1390948_at   | Phemx     | pan hematopoietic expression                                                             |
| 0.00 | 0.04 | 247.24  | 108.87 | 2.27 | 1371537_at   | B4galt5   | UDP-Gal:betaGlcNAc beta 1,4-galactosyltransferase, polypeptide 5                         |
| 0.00 | 0.03 | 718.19  | 316.46 | 2.27 | 1371727_at   | Glb1      | galactosidase, beta 1                                                                    |
| 0.00 | 0.03 | 261.55  | 115.35 | 2.27 | 1371468_at   | LOC312502 | similar to RAB11 family interacting protein 5 (class I) isoform 1                        |
| 0.00 | 0.02 | 1266.64 | 560.11 | 2.26 | 1367925_at   | Mvp       | major vault protein                                                                      |
| 0.00 | 0.01 | 1291.01 | 573.64 | 2.25 | 1379366_a_at | Bspry     | B-box and SPRY domain containing                                                         |
| 0.00 | 0.02 | 67.09   | 29.83  | 2.25 | 1367919_at   | Nup210    | nucleoporin 210                                                                          |
| 0.00 | 0.03 | 107.08  | 47.69  | 2.25 | 1379425_at   | Dem1      | defects in morphology 1 homolog (S. cerevisiae)                                          |
| 0.00 | 0.03 | 261.82  | 117.05 | 2.24 | 1392927_at   | Pagr4     | progesterin and adipoQ receptor family member IV                                         |



|      |      |         |        |      |              |            |                                                                                       |
|------|------|---------|--------|------|--------------|------------|---------------------------------------------------------------------------------------|
| 0.00 | 0.00 | 93.70   | 42.09  | 2.23 | 1378914_a_at | LOC308990  | hypothetical protein LOC308990                                                        |
| 0.00 | 0.03 | 88.19   | 39.83  | 2.21 | 1397540_at   | NA         | NA                                                                                    |
| 0.00 | 0.02 | 671.38  | 303.56 | 2.21 | 1377660_at   | RGD1309350 | similar to transthyretin (4L369)                                                      |
| 0.00 | 0.04 | 121.93  | 55.66  | 2.19 | 1374537_at   | Chsy1      | chondroitin sulfate synthase 1                                                        |
| 0.00 | 0.03 | 699.74  | 319.44 | 2.19 | 1369944_at   | Marcks1    | MARCKS-like 1                                                                         |
| 0.00 | 0.01 | 143.92  | 65.72  | 2.19 | 1388740_at   | Fermt3     | fermitin family homolog 3 (Drosophila)                                                |
| 0.00 | 0.01 | 192.44  | 87.92  | 2.19 | 1371106_at   | Itgb7      | integrin, beta 7                                                                      |
| 0.00 | 0.02 | 74.01   | 33.95  | 2.18 | 1393003_at   | NA         | NA                                                                                    |
| 0.00 | 0.01 | 69.79   | 32.11  | 2.17 | 1377153_a_at | Klhl6      | kelch-like 6 (Drosophila)                                                             |
| 0.00 | 0.02 | 202.22  | 93.10  | 2.17 | 1397548_at   | Hmha1      | histocompatibility (minor) HA-1                                                       |
| 0.00 | 0.02 | 230.28  | 106.87 | 2.15 | 1389109_at   | Pip4k2a    | phosphatidylinositol-5-phosphate 4-kinase, type II, alpha                             |
| 0.00 | 0.01 | 187.71  | 87.14  | 2.15 | 1385723_at   | NA         | NA                                                                                    |
| 0.00 | 0.02 | 75.78   | 35.35  | 2.14 | 1382404_at   | NA         | NA                                                                                    |
| 0.00 | 0.02 | 55.63   | 25.95  | 2.14 | 1377975_at   | NA         | NA                                                                                    |
| 0.00 | 0.01 | 345.01  | 161.09 | 2.14 | 1390553_at   | Tmem194b   | transmembrane protein 194B                                                            |
| 0.00 | 0.01 | 307.35  | 144.05 | 2.13 | 1375643_at   | Ckap4      | cytoskeleton-associated protein 4                                                     |
| 0.00 | 0.04 | 240.64  | 112.97 | 2.13 | 1385986_at   | NA         | NA                                                                                    |
| 0.00 | 0.02 | 125.04  | 58.73  | 2.13 | 1390287_at   | Bin2       | bridging integrator 2                                                                 |
| 0.00 | 0.02 | 1571.05 | 738.49 | 2.13 | 1370848_at   | Slc2a1     | solute carrier family 2 (facilitated glucose transporter), member 1                   |
| 0.00 | 0.03 | 172.63  | 81.29  | 2.12 | 1369197_at   | Apaf1      | apoptotic peptidase activating factor 1                                               |
| 0.00 | 0.03 | 76.49   | 36.04  | 2.12 | 1372989_at   | Zdhhc14    | zinc finger, DHHC-type containing 14                                                  |
| 0.00 | 0.03 | 87.62   | 41.41  | 2.12 | 1372308_at   | NA         | NA                                                                                    |
| 0.00 | 0.01 | 153.30  | 72.61  | 2.11 | 1380410_at   | NA         | NA                                                                                    |
| 0.00 | 0.00 | 60.47   | 28.67  | 2.11 | 1390694_at   | NA         | NA                                                                                    |
| 0.00 | 0.01 | 97.27   | 46.17  | 2.11 | 1379284_at   | Ubash3b    | ubiquitin associated and SH3 domain containing, B                                     |
| 0.00 | 0.03 | 102.57  | 48.82  | 2.10 | 1398098_at   | NA         | NA                                                                                    |
| 0.00 | 0.02 | 73.97   | 35.27  | 2.10 | 1379698_at   | NA         | NA                                                                                    |
| 0.00 | 0.01 | 21.02   | 10.02  | 2.10 | 1380803_at   | NA         | NA                                                                                    |
| 0.00 | 0.01 | 101.10  | 48.26  | 2.10 | 1377759_at   | Bid        | BH3 interacting domain death agonist                                                  |
| 0.00 | 0.02 | 63.94   | 30.60  | 2.09 | 1388026_at   | Cd247      | Cd247 molecule                                                                        |
| 0.00 | 0.02 | 269.95  | 129.38 | 2.09 | 1383426_at   | Pstpip1    | proline-serine-threonine phosphatase-interacting protein 1                            |
| 0.00 | 0.03 | 52.22   | 25.14  | 2.08 | 1384090_at   | Pigo       | phosphatidylinositol glycan anchor biosynthesis, class O                              |
| 0.00 | 0.02 | 22.05   | 10.65  | 2.07 | 1386482_at   | NA         | NA                                                                                    |
| 0.00 | 0.02 | 45.31   | 21.89  | 2.07 | 1397214_at   | NA         | NA                                                                                    |
| 0.00 | 0.02 | 175.68  | 84.91  | 2.07 | 1376835_at   | Nfkbie     | nuclear factor of kappa light polypeptide gene enhancer in B-cells inhibitor, epsilon |
| 0.00 | 0.01 | 1253.05 | 607.94 | 2.06 | 1378133_at   | Slc7a11    | solute carrier family 7 (cationic amino acid transporter, y+ system), member 11       |
| 0.00 | 0.00 | 143.56  | 69.88  | 2.05 | 1382920_at   | Lrrc8a     | leucine rich repeat containing 8 family, member A                                     |
| 0.00 | 0.02 | 33.28   | 16.20  | 2.05 | 1379150_at   | NA         | NA                                                                                    |
| 0.00 | 0.04 | 38.47   | 18.73  | 2.05 | 1374939_at   | Cyfp2      | cytoplasmic FMR1 interacting protein 2                                                |
| 0.00 | 0.03 | 500.78  | 243.88 | 2.05 | 1388492_at   | Tnip1      | TNFAIP3 interacting protein 1                                                         |
| 0.00 | 0.03 | 353.22  | 172.57 | 2.05 | 1381461_at   | NA         | NA                                                                                    |
| 0.00 | 0.03 | 172.46  | 84.49  | 2.04 | 1376627_at   | NA         | NA                                                                                    |
| 0.00 | 0.02 | 499.72  | 245.25 | 2.04 | 1373889_at   | RGD1561778 | similar to dendritic cell-derived immunoglobulin(Ig)-like receptor 1, DlgR1 - mouse   |

|      |      |         |         |      |              |            |                                                                                         |
|------|------|---------|---------|------|--------------|------------|-----------------------------------------------------------------------------------------|
| 0.00 | 0.00 | 45.53   | 22.36   | 2.04 | 1385336_at   | Dok2       | docking protein 2                                                                       |
| 0.00 | 0.02 | 3577.21 | 1761.16 | 2.03 | 1374987_at   | NA         | NA                                                                                      |
| 0.00 | 0.02 | 45.91   | 22.65   | 2.03 | 1388282_s_at | Klra5      | killer cell lectin-like receptor, subfamily A, member 5                                 |
| 0.00 | 0.01 | 20.91   | 10.41   | 2.01 | 1377106_at   | NA         | NA                                                                                      |
| 0.00 | 0.01 | 113.31  | 56.48   | 2.01 | 1384191_at   | NA         | NA                                                                                      |
| 0.00 | 0.02 | 88.66   | 44.22   | 2.01 | 1385046_at   | Fam55c     | family with sequence similarity 55, member C                                            |
| 0.00 | 0.03 | 132.41  | 66.06   | 2.00 | 1385159_at   | Nbeal2     | neurobeachin-like 2                                                                     |
| 0.00 | 0.03 | 186.78  | 93.49   | 2.00 | 1373631_at   | Rap1gap    | Rap1 GTPase-activating protein                                                          |
| 0.00 | 0.01 | 184.89  | 92.57   | 2.00 | 1371256_at   | Ptpn18     | protein tyrosine phosphatase, non-receptor type 18                                      |
| 0.00 | 0.02 | 768.66  | 386.47  | 1.99 | 1391743_at   | Elavl1     | ELAV (embryonic lethal, abnormal vision, Drosophila)-like 1 (Hu antigen R)              |
| 0.00 | 0.01 | 251.00  | 126.35  | 1.99 | 1387310_at   | Atp2c2     | ATPase, Ca++ transporting, type 2C, member 2                                            |
| 0.00 | 0.02 | 1026.97 | 517.32  | 1.99 | 1398481_at   | NA         | NA                                                                                      |
| 0.00 | 0.02 | 333.82  | 168.30  | 1.98 | 1367881_at   | Sirpa      | signal-regulatory protein alpha                                                         |
| 0.00 | 0.03 | 93.62   | 47.33   | 1.98 | 1391803_at   | NA         | NA                                                                                      |
| 0.00 | 0.02 | 2707.53 | 1369.70 | 1.98 | 1372070_at   | Ifi30      | interferon gamma inducible protein 30                                                   |
| 0.00 | 0.02 | 421.66  | 215.41  | 1.96 | 1384944_at   | Bcl11b     | B-cell CLL/lymphoma 11B (zinc finger protein)                                           |
| 0.00 | 0.03 | 73.35   | 37.49   | 1.96 | 1378980_at   | RGD1305685 | similar to hypothetical protein FLJ13089                                                |
| 0.00 | 0.03 | 42.41   | 21.76   | 1.95 | 1369044_a_at | Pde4b      | phosphodiesterase 4B, cAMP specific                                                     |
| 0.00 | 0.02 | 41.84   | 21.54   | 1.94 | 1391741_a_at | NA         | NA                                                                                      |
| 0.00 | 0.03 | 183.03  | 94.26   | 1.94 | 1385696_at   | NA         | NA                                                                                      |
| 0.00 | 0.02 | 118.29  | 61.01   | 1.94 | 1377116_at   | Rnasel     | ribonuclease L (2@#%\$&.5@#%\$&-oligoisoadenylate synthetase-dependent)                 |
| 0.00 | 0.03 | 496.95  | 256.31  | 1.94 | 1373611_at   | Il17ra     | interleukin 17 receptor A                                                               |
| 0.00 | 0.03 | 257.20  | 133.04  | 1.93 | 1367915_at   | Dgat1      | diacylglycerol O-acyltransferase homolog 1 (mouse)                                      |
| 0.00 | 0.02 | 79.74   | 41.25   | 1.93 | 1376197_at   | Tcf7       | transcription factor 7, T-cell specific                                                 |
| 0.00 | 0.02 | 170.52  | 88.25   | 1.93 | 1372135_at   | Ptk9l      | protein tyrosine kinase 9-like (A6-related protein)                                     |
| 0.00 | 0.03 | 80.79   | 41.90   | 1.93 | 1381161_a_at | NA         | NA                                                                                      |
| 0.00 | 0.03 | 58.45   | 30.36   | 1.93 | 1378447_at   | NA         | NA                                                                                      |
| 0.00 | 0.02 | 370.09  | 192.86  | 1.92 | 1379520_at   | NA         | NA                                                                                      |
| 0.00 | 0.03 | 87.26   | 45.49   | 1.92 | 1373226_at   | RGD1308019 | similar to hypothetical protein FLJ20245                                                |
| 0.00 | 0.03 | 236.62  | 123.44  | 1.92 | 1375989_a_at | Nfkb2      | nuclear factor of kappa light polypeptide gene enhancer in B-cells 2, p49/p100          |
| 0.00 | 0.01 | 356.96  | 186.32  | 1.92 | 1377630_at   | Tspan13    | tetraspanin 13                                                                          |
| 0.00 | 0.01 | 277.95  | 145.40  | 1.91 | 1393183_at   | Stard5     | StAR-related lipid transfer (START) domain containing 5                                 |
| 0.00 | 0.03 | 68.56   | 35.89   | 1.91 | 1368109_at   | St3gal5    | ST3 beta-galactoside alpha-2,3-sialyltransferase 5                                      |
| 0.00 | 0.01 | 486.38  | 254.63  | 1.91 | 1376040_at   | Sipa12     | signal-induced proliferation-associated 1 like 2                                        |
| 0.00 | 0.00 | 53.76   | 28.16   | 1.91 | 1382597_at   | NA         | NA                                                                                      |
| 0.00 | 0.02 | 308.65  | 161.71  | 1.91 | 1374300_at   | Entpd4     | ectonucleoside triphosphate diphosphohydrolase 4                                        |
| 0.00 | 0.02 | 679.43  | 356.31  | 1.91 | 1377892_at   | Sema3f     | sema domain, immunoglobulin domain (Ig), short basic domain, secreted, (semaphorin) 3 F |
| 0.00 | 0.00 | 401.74  | 210.98  | 1.90 | 1387104_at   | Scnn1a     | sodium channel, nonvoltage-gated, type I, alpha                                         |
| 0.00 | 0.02 | 1277.29 | 672.78  | 1.90 | 1367675_at   | Cib1       | calcium and integrin binding 1 (calmyrin)                                               |

|      |      |         |         |      |            |           |                                                                       |
|------|------|---------|---------|------|------------|-----------|-----------------------------------------------------------------------|
| 0.00 | 0.03 | 104.80  | 55.25   | 1.90 | 1390909_at | NA        | NA                                                                    |
| 0.00 | 0.02 | 86.21   | 45.46   | 1.90 | 1369038_at | Itgad     | integrin, alpha D                                                     |
| 0.00 | 0.02 | 155.75  | 82.30   | 1.89 | 1370516_at | Slc15a3   | solute carrier family 15, member 3                                    |
| 0.00 | 0.02 | 318.79  | 168.96  | 1.89 | 1385919_at | NA        | NA                                                                    |
| 0.00 | 0.03 | 82.16   | 43.60   | 1.88 | 1395775_at | NA        | NA                                                                    |
| 0.00 | 0.02 | 65.75   | 34.92   | 1.88 | 1375118_at | NA        | NA                                                                    |
| 0.00 | 0.03 | 5420.80 | 2882.55 | 1.88 | 1370156_at | Prnp      | prion protein                                                         |
| 0.00 | 0.01 | 109.43  | 58.46   | 1.87 | 1368770_at | Gcnt1     | glucosaminyl (N-acetyl) transferase 1, core 2                         |
| 0.00 | 0.02 | 200.31  | 107.11  | 1.87 | 1382110_at | Cnpy3     | canopy 3 homolog (zebrafish)                                          |
| 0.00 | 0.02 | 64.07   | 34.43   | 1.86 | 1394805_at | NA        | NA                                                                    |
| 0.00 | 0.03 | 195.27  | 105.21  | 1.86 | 1398745_at | NA        | NA                                                                    |
| 0.00 | 0.02 | 35.99   | 19.42   | 1.85 | 1385382_at | NA        | NA                                                                    |
| 0.00 | 0.02 | 113.73  | 61.38   | 1.85 | 1368251_at | Jak3      | Janus kinase 3                                                        |
| 0.00 | 0.03 | 1278.33 | 690.63  | 1.85 | 1389494_at | Ccdc88b   | coiled-coil domain containing 88B                                     |
| 0.00 | 0.01 | 234.92  | 127.10  | 1.85 | 1390859_at | N4bp1     | Nedd4 binding protein 1                                               |
| 0.00 | 0.03 | 59.45   | 32.20   | 1.85 | 1382087_at | NA        | NA                                                                    |
| 0.00 | 0.03 | 16.93   | 9.18    | 1.84 | 1392214_at | NA        | NA                                                                    |
| 0.00 | 0.02 | 43.00   | 23.34   | 1.84 | 1370617_at | Grb2      | growth factor receptor bound protein 2                                |
| 0.00 | 0.02 | 100.85  | 54.84   | 1.84 | 1372427_at | Raver1    | ribonucleoprotein, PTB-binding 1                                      |
| 0.00 | 0.03 | 488.60  | 265.84  | 1.84 | 1387264_at | Kcnk6     | potassium inwardly-rectifying channel, subfamily K, member 6          |
| 0.00 | 0.02 | 176.86  | 96.39   | 1.83 | 1386185_at | NA        | NA                                                                    |
| 0.00 | 0.03 | 176.71  | 96.36   | 1.83 | 1397157_at | NA        | NA                                                                    |
| 0.00 | 0.02 | 270.00  | 147.41  | 1.83 | 1380521_at | Hcls1     | hematopoietic cell specific Lyn substrate 1                           |
| 0.00 | 0.02 | 254.62  | 139.48  | 1.83 | 1372408_at | Gga2      | golgi associated, gamma adaptin ear containing, ARF binding protein 2 |
| 0.00 | 0.02 | 16.68   | 9.16    | 1.82 | 1384035_at | LOC685277 | similar to liver-specific bHLH-Zip transcription factor               |
| 0.00 | 0.02 | 81.24   | 44.61   | 1.82 | 1398330_at | Stxbp1    | syntaxin binding protein 1                                            |
| 0.00 | 0.02 | 85.24   | 47.38   | 1.80 | 1370469_at | Ptpn7     | protein tyrosine phosphatase, non-receptor type 7                     |
| 0.00 | 0.03 | 110.70  | 61.56   | 1.80 | 1377002_at | NA        | NA                                                                    |
| 0.00 | 0.02 | 99.79   | 55.52   | 1.80 | 1397781_at | NA        | NA                                                                    |
| 0.00 | 0.02 | 658.37  | 366.56  | 1.80 | 1375211_at | Rnaset2   | ribonuclease T2                                                       |
| 0.00 | 0.01 | 277.93  | 155.14  | 1.79 | 1373863_at | Map4k4    | mitogen-activated protein kinase kinase kinase kinase 4               |
| 0.00 | 0.04 | 190.96  | 106.78  | 1.79 | 1373519_at | NA        | NA                                                                    |
| 0.00 | 0.03 | 153.21  | 85.80   | 1.79 | 1368754_at | P2ry6     | pyrimidinergic receptor P2Y, G-protein coupled, 6                     |
| 0.00 | 0.03 | 72.40   | 40.60   | 1.78 | 1382392_at | NA        | NA                                                                    |
| 0.00 | 0.01 | 76.95   | 43.18   | 1.78 | 1369387_at | Vav1      | vav 1 guanine nucleotide exchange factor                              |
| 0.00 | 0.02 | 111.04  | 62.31   | 1.78 | 1372027_at | NA        | NA                                                                    |
| 0.00 | 0.03 | 63.51   | 35.71   | 1.78 | 1380154_at | Immt      | inner membrane protein, mitochondrial                                 |
| 0.00 | 0.01 | 627.46  | 352.82  | 1.78 | 1389988_at | Kctd2     | potassium channel tetramerisation domain containing 2                 |
| 0.00 | 0.02 | 202.23  | 113.99  | 1.77 | 1372921_at | NA        | NA                                                                    |
| 0.00 | 0.01 | 81.53   | 45.98   | 1.77 | 1384350_at | Nckap1l   | NCK associated protein 1 like                                         |
| 0.00 | 0.03 | 195.83  | 110.50  | 1.77 | 1380028_at | Arl4c     | ADP-ribosylation factor-like 4C                                       |
| 0.00 | 0.03 | 115.31  | 65.07   | 1.77 | 1388742_at | NA        | NA                                                                    |
| 0.00 | 0.03 | 121.43  | 68.71   | 1.77 | 1373298_at | NA        | NA                                                                    |
| 0.00 | 0.03 | 1227.09 | 696.06  | 1.76 | 1388763_at | LOC690976 | similar to Calponin-2 (Calponin H2, smooth muscle) (Neutral calponin) |

|      |      |         |        |      |              |           |                                                                                         |
|------|------|---------|--------|------|--------------|-----------|-----------------------------------------------------------------------------------------|
| 0.00 | 0.02 | 147.56  | 83.76  | 1.76 | 1373031_at   | Trim8     | tripartite motif-containing 8                                                           |
| 0.00 | 0.01 | 219.11  | 124.67 | 1.76 | 1373528_at   | Pik3cd    | phosphatidylinositol 3-kinase catalytic delta polypeptide                               |
| 0.00 | 0.04 | 383.06  | 218.03 | 1.76 | 1380851_at   | Sema3f    | sema domain, immunoglobulin domain (Ig), short basic domain, secreted, (semaphorin) 3 F |
| 0.00 | 0.03 | 69.00   | 39.36  | 1.75 | 1376675_at   | Cd300a    | CD300A molecule                                                                         |
| 0.00 | 0.01 | 161.30  | 92.02  | 1.75 | 1368010_at   | Ptpn6     | protein tyrosine phosphatase, non-receptor type 6                                       |
| 0.00 | 0.03 | 337.04  | 192.80 | 1.75 | 1368254_a_at | Sphk1     | sphingosine kinase 1                                                                    |
| 0.00 | 0.01 | 386.45  | 221.92 | 1.74 | 1371782_at   | Nipsnap3a | nipsnap homolog 3A (C. elegans)                                                         |
| 0.00 | 0.03 | 63.24   | 36.38  | 1.74 | 1376795_at   | Pik3ap1   | phosphoinositide-3-kinase adaptor protein 1                                             |
| 0.00 | 0.03 | 31.73   | 18.28  | 1.74 | 1398719_at   | Cdyl2     | chromodomain protein, Y chromosome-like 2                                               |
| 0.00 | 0.03 | 162.75  | 94.02  | 1.73 | 1376895_at   | Il16      | interleukin 16                                                                          |
| 0.00 | 0.02 | 310.18  | 179.20 | 1.73 | 1383618_at   | Mrp138    | mitochondrial ribosomal protein L38                                                     |
| 0.00 | 0.02 | 1206.38 | 697.48 | 1.73 | 1368118_at   | Bcl10     | B-cell CLL/lymphoma 10                                                                  |
| 0.00 | 0.02 | 333.40  | 193.22 | 1.73 | 1376568_at   | NA        | NA                                                                                      |
| 0.00 | 0.03 | 107.64  | 62.56  | 1.72 | 1375020_at   | Rin3      | Ras and Rab interactor 3                                                                |
| 0.00 | 0.03 | 275.59  | 160.69 | 1.72 | 1376701_a_at | MGC94282  | similar to 5930416119Rik protein                                                        |
| 0.00 | 0.03 | 231.56  | 135.33 | 1.71 | 1387205_at   | H2-M3     | histocompatibility 2, M region locus 3                                                  |
| 0.00 | 0.02 | 482.11  | 282.04 | 1.71 | 1374676_at   | NA        | NA                                                                                      |
| 0.00 | 0.03 | 12.67   | 7.41   | 1.71 | 1382337_at   | Stap1     | signal transducing adaptor family member 1                                              |
| 0.00 | 0.01 | 25.64   | 15.06  | 1.70 | 1382891_at   | Usp27x    | ubiquitin specific peptidase 27, X-linked                                               |
| 0.00 | 0.02 | 366.33  | 215.22 | 1.70 | 1383074_at   | Man2a1    | mannosidase, alpha, class 2A, member 1                                                  |
| 0.00 | 0.03 | 53.76   | 31.59  | 1.70 | 1382107_at   | NA        | NA                                                                                      |
| 0.00 | 0.01 | 87.64   | 51.70  | 1.70 | 1375420_at   | Tp53i11   | tumor protein p53 inducible protein 11                                                  |
| 0.00 | 0.03 | 135.46  | 80.11  | 1.69 | 1369310_at   | Basp1     | brain abundant, membrane attached signal protein 1                                      |
| 0.00 | 0.01 | 151.57  | 89.77  | 1.69 | 1373928_at   | Il17re    | interleukin 17 receptor E                                                               |
| 0.00 | 0.02 | 66.64   | 39.47  | 1.69 | 1374025_at   | Nmnat3    | nicotinamide nucleotide adenylyltransferase 3                                           |
| 0.00 | 0.03 | 46.93   | 27.85  | 1.68 | 1381079_at   | Bnc1      | basonuclin 1                                                                            |
| 0.00 | 0.01 | 105.60  | 62.73  | 1.68 | 1396623_at   | NA        | NA                                                                                      |
| 0.00 | 0.03 | 89.63   | 53.58  | 1.67 | 1393757_at   | N4bp211   | NEDD4 binding protein 2-like 1                                                          |
| 0.00 | 0.02 | 47.20   | 28.26  | 1.67 | 1392335_at   | NA        | NA                                                                                      |
| 0.00 | 0.01 | 112.09  | 67.35  | 1.66 | 1374265_at   | NA        | NA                                                                                      |
| 0.00 | 0.03 | 140.31  | 84.62  | 1.66 | 1381790_at   | Map4k4    | mitogen-activated protein kinase kinase kinase 4                                        |
| 0.00 | 0.02 | 717.19  | 432.60 | 1.66 | 1377821_at   | NA        | NA                                                                                      |
| 0.00 | 0.02 | 261.73  | 158.22 | 1.65 | 1372138_at   | Cux1      | cut-like homeobox 1                                                                     |
| 0.00 | 0.03 | 34.85   | 21.09  | 1.65 | 1396133_at   | Itgb5     | integrin, beta 5                                                                        |
| 0.00 | 0.03 | 226.66  | 137.14 | 1.65 | 1376200_at   | MGC72974  | hypothetical LOC316976                                                                  |
| 0.00 | 0.03 | 103.68  | 62.78  | 1.65 | 1376255_at   | Map4k1    | mitogen activated protein kinase kinase kinase 1                                        |
| 0.00 | 0.01 | 666.38  | 404.10 | 1.65 | 1373150_at   | Comtd1    | catechol-O-methyltransferase domain containing 1                                        |
| 0.00 | 0.03 | 84.08   | 51.57  | 1.63 | 1369483_at   | Cd4       | Cd4 molecule                                                                            |
| 0.00 | 0.03 | 39.81   | 24.48  | 1.63 | 1397713_at   | NA        | NA                                                                                      |
| 0.00 | 0.03 | 573.77  | 353.81 | 1.62 | 1383152_at   | Chid1     | chitinase domain containing 1                                                           |
| 0.00 | 0.03 | 63.00   | 38.89  | 1.62 | 1397102_at   | NA        | NA                                                                                      |
| 0.00 | 0.03 | 205.96  | 127.27 | 1.62 | 1394452_at   | NA        | NA                                                                                      |

|      |      |         |         |      |              |            |                                                                   |
|------|------|---------|---------|------|--------------|------------|-------------------------------------------------------------------|
| 0.00 | 0.02 | 33.12   | 20.48   | 1.62 | 1379975_at   | NA         | NA                                                                |
| 0.00 | 0.03 | 389.32  | 241.02  | 1.62 | 1383863_at   | Lmo2       | LIM domain only 2                                                 |
| 0.00 | 0.02 | 1764.02 | 1092.56 | 1.61 | 1371715_at   | MGC112883  | LOC500651                                                         |
| 0.00 | 0.04 | 291.13  | 180.40  | 1.61 | 1390000_at   | Jmjd3      | jumonji domain containing 3                                       |
| 0.00 | 0.02 | 73.45   | 45.54   | 1.61 | 1384292_at   | Dok1       | docking protein 1                                                 |
| 0.00 | 0.02 | 29.70   | 18.48   | 1.61 | 1380653_at   | NA         | NA                                                                |
| 0.00 | 0.03 | 497.34  | 310.84  | 1.60 | 1373852_at   | Srd5a3     | steroid 5 alpha-reductase 3                                       |
| 0.00 | 0.01 | 143.99  | 90.07   | 1.60 | 1377321_at   | NA         | NA                                                                |
| 0.00 | 0.01 | 30.50   | 19.13   | 1.59 | 1375370_at   | NA         | NA                                                                |
| 0.00 | 0.00 | 177.01  | 111.05  | 1.59 | 1376160_at   | Sfrs16     | splicing factor, arginine/serine-rich 16                          |
| 0.00 | 0.02 | 1061.64 | 666.92  | 1.59 | 1377103_at   | Midn       | midnolin                                                          |
| 0.00 | 0.01 | 338.19  | 212.78  | 1.59 | 1383608_at   | Arrdc2     | arrestin domain containing 2                                      |
| 0.00 | 0.01 | 580.47  | 365.70  | 1.59 | 1371446_at   | Mapkapk2   | mitogen-activated protein kinase-activated protein kinase 2       |
| 0.00 | 0.02 | 40.26   | 25.38   | 1.59 | 1386069_at   | Sp2        | Sp2 transcription factor                                          |
| 0.00 | 0.03 | 4788.21 | 3019.28 | 1.59 | 1387766_a_at | Rbp2       | retinol binding protein 2, cellular                               |
| 0.00 | 0.01 | 771.53  | 490.76  | 1.57 | 1399157_at   | RGD1310358 | similar to NNX3                                                   |
| 0.00 | 0.03 | 250.76  | 160.10  | 1.57 | 1392425_x_at | Luc7l      | LUC7-like ( <i>S. cerevisiae</i> )                                |
| 0.00 | 0.02 | 270.29  | 173.14  | 1.56 | 1389347_at   | Pitpnm1    | phosphatidylinositol transfer protein, membrane-associated 1      |
| 0.00 | 0.03 | 22.02   | 14.19   | 1.55 | 1383833_at   | Fam55b     | family with sequence similarity 55, member B                      |
| 0.00 | 0.02 | 158.30  | 102.04  | 1.55 | 1398335_at   | Ttyh3      | tweety homolog 3 ( <i>Drosophila</i> )                            |
| 0.00 | 0.01 | 290.94  | 188.15  | 1.55 | 1387132_at   | Lipe       | lipase, hormone sensitive                                         |
| 0.00 | 0.02 | 41.09   | 26.62   | 1.54 | 1380469_at   | NA         | NA                                                                |
| 0.00 | 0.00 | 146.66  | 95.09   | 1.54 | 1390936_at   | Lgi4       | leucine-rich repeat LGI family, member 4                          |
| 0.00 | 0.03 | 1231.99 | 802.00  | 1.54 | 1391106_at   | NA         | NA                                                                |
| 0.00 | 0.03 | 54.20   | 35.29   | 1.54 | 1397209_at   | RGD1565712 | similar to Hypothetical protein MGC59495                          |
| 0.00 | 0.03 | 1357.65 | 884.50  | 1.53 | 1388468_at   | Cdc42se1   | CDC42 small effector 1                                            |
| 0.00 | 0.02 | 278.07  | 181.25  | 1.53 | 1372561_at   | Smap2      | small ArfGAP2                                                     |
| 0.00 | 0.02 | 355.96  | 232.21  | 1.53 | 1385608_at   | NA         | NA                                                                |
| 0.00 | 0.02 | 132.45  | 86.41   | 1.53 | 1383350_at   | Slc35c2    | solute carrier family 35, member C2                               |
| 0.00 | 0.01 | 136.30  | 88.99   | 1.53 | 1384997_at   | Aen        | apoptosis enhancing nuclease                                      |
| 0.00 | 0.02 | 14.17   | 9.25    | 1.53 | 1380468_a_at | NA         | NA                                                                |
| 0.00 | 0.04 | 58.11   | 37.99   | 1.53 | 1392301_at   | Sh3tc1     | SH3 domain and tetratricopeptide repeats 1                        |
| 0.00 | 0.01 | 50.14   | 32.88   | 1.52 | 1374320_at   | F5         | coagulation factor V (proaccelerin, labile factor)                |
| 0.00 | 0.01 | 229.87  | 150.87  | 1.52 | 1381016_at   | NA         | NA                                                                |
| 0.00 | 0.03 | 169.81  | 111.79  | 1.52 | 1369088_at   | ErbB3      | v-erb-b2 erythroblastic leukemia viral oncogene homolog 3 (avian) |
| 0.00 | 0.01 | 45.42   | 29.91   | 1.52 | 1369552_at   | Samsn1     | SAM domain, SH3 domain and nuclear localization signals, 1        |
| 0.00 | 0.02 | 296.18  | 195.26  | 1.52 | 1374686_at   | Slc30a7    | solute carrier family 30 (zinc transporter), member 7             |
| 0.00 | 0.03 | 12.47   | 8.22    | 1.52 | 1381940_at   | NA         | NA                                                                |
| 0.00 | 0.02 | 25.32   | 16.71   | 1.52 | 1395205_at   | NA         | NA                                                                |
| 0.00 | 0.02 | 146.40  | 96.70   | 1.51 | 1394047_at   | NA         | NA                                                                |
| 0.00 | 0.02 | 88.75   | 58.64   | 1.51 | 1375839_at   | NA         | NA                                                                |
| 0.00 | 0.03 | 67.79   | 44.86   | 1.51 | 1379311_at   | Arid5a     | AT rich interactive domain 5A (Mrf1 like)                         |
| 0.00 | 0.03 | 131.66  | 87.16   | 1.51 | 1385534_at   | Ngfrap1    | nerve growth factor receptor (TNFRSF16) associated protein 1      |
| 0.00 | 0.03 | 223.31  | 148.79  | 1.50 | 1372129_at   | Tbc1d9b    | TBC1 domain family, member 9B                                     |

|      |      |         |         |      |              |            |                                                                                                                                                        |
|------|------|---------|---------|------|--------------|------------|--------------------------------------------------------------------------------------------------------------------------------------------------------|
| 0.00 | 0.03 | 38.24   | 25.52   | 1.50 | 1393830_at   | Sh2d2a     | SH2 domain protein 2A                                                                                                                                  |
| 0.00 | 0.04 | 28.50   | 19.03   | 1.50 | 1378549_at   | NA         | NA                                                                                                                                                     |
| 0.00 | 0.03 | 57.17   | 38.24   | 1.50 | 1389516_at   | NA         | NA                                                                                                                                                     |
| 0.00 | 0.02 | 29.95   | 20.04   | 1.49 | 1387879_a_at | Cugbp2     | CUG triplet repeat, RNA binding protein 2                                                                                                              |
| 0.00 | 0.03 | 137.77  | 92.27   | 1.49 | 1374221_at   | Slc29a3    | solute carrier family 29 (nucleoside transporters), member 3                                                                                           |
| 0.00 | 0.02 | 153.73  | 103.56  | 1.48 | 1382811_at   | NA         | NA                                                                                                                                                     |
| 0.00 | 0.02 | 97.28   | 65.60   | 1.48 | 1378982_at   | NA         | NA                                                                                                                                                     |
| 0.00 | 0.03 | 14.44   | 9.74    | 1.48 | 1393333_at   | NA         | NA                                                                                                                                                     |
| 0.00 | 0.02 | 1379.91 | 932.64  | 1.48 | 1373033_at   | Sft2d1     | SFT2 domain containing 1                                                                                                                               |
| 0.00 | 0.02 | 91.77   | 62.30   | 1.47 | 1387905_at   | Dnajc12    | DnaJ (Hsp40) homolog, subfamily C, member 12                                                                                                           |
| 0.00 | 0.03 | 472.86  | 321.29  | 1.47 | 1382008_at   | RGD1309804 | similar to hypothetical protein FLJ11218                                                                                                               |
| 0.00 | 0.02 | 41.83   | 28.45   | 1.47 | 1382817_at   | Mcm3ap     | minichromosome maintenance deficient 3 (S. cerevisiae) associated protein                                                                              |
| 0.00 | 0.03 | 91.48   | 62.42   | 1.47 | 1378437_at   | NA         | NA                                                                                                                                                     |
| 0.00 | 0.00 | 4462.41 | 3047.89 | 1.46 | 1388113_at   | Cox8a      | cytochrome c oxidase, subunit VIIIa                                                                                                                    |
| 0.00 | 0.03 | 505.37  | 345.23  | 1.46 | 1387066_a_at | Rgs12      | regulator of G-protein signaling 12                                                                                                                    |
| 0.00 | 0.01 | 237.14  | 162.25  | 1.46 | 1390154_at   | LOC686326  | similar to Interferon-alpha/beta receptor beta chain precursor (IFN-alpha-REC) (Type I interferon receptor) (IFN-R) (Interferon alpha/beta receptor-2) |
| 0.00 | 0.02 | 37.46   | 25.71   | 1.46 | 1370733_at   | Lipogenin  | Lipogenin                                                                                                                                              |
| 0.00 | 0.02 | 1404.54 | 964.42  | 1.46 | 1373100_at   | LOC499779  | similar to RIKEN cDNA 2900010J23                                                                                                                       |
| 0.00 | 0.03 | 247.43  | 169.90  | 1.46 | 1372955_at   | Stk38l     | serine/threonine kinase 38 like                                                                                                                        |
| 0.00 | 0.03 | 180.41  | 124.10  | 1.45 | 1383917_at   | Abi3       | ABI family, member 3                                                                                                                                   |
| 0.00 | 0.02 | 137.62  | 94.93   | 1.45 | 1376839_at   | NA         | NA                                                                                                                                                     |
| 0.00 | 0.03 | 223.20  | 154.27  | 1.45 | 1373262_at   | RGD1309543 | similar to 2310014H01Rik protein                                                                                                                       |
| 0.00 | 0.03 | 511.23  | 353.35  | 1.45 | 1399023_at   | Ric8a      | resistance to inhibitors of cholinesterase 8 homolog A (C. elegans)                                                                                    |
| 0.00 | 0.02 | 19.91   | 13.77   | 1.45 | 1385587_at   | Mcoln2     | mucolin 2                                                                                                                                              |
| 0.00 | 0.03 | 19.37   | 13.41   | 1.44 | 1395319_at   | NA         | NA                                                                                                                                                     |
| 0.00 | 0.02 | 108.68  | 75.50   | 1.44 | 1379280_at   | NA         | NA                                                                                                                                                     |
| 0.00 | 0.01 | 66.42   | 46.33   | 1.43 | 1369214_a_at | Ciita      | class II transactivator                                                                                                                                |
| 0.00 | 0.03 | 74.89   | 52.26   | 1.43 | 1377159_at   | Tsc22d4    | TSC22 domain family, member 4                                                                                                                          |
| 0.00 | 0.02 | 1176.94 | 823.21  | 1.43 | 1367710_at   | Psme2      | proteasome (prosome, macropain) activator subunit 2                                                                                                    |
| 0.00 | 0.02 | 9.75    | 6.83    | 1.43 | 1385831_at   | Sash3      | SAM and SH3 domain containing 3                                                                                                                        |
| 0.00 | 0.00 | 480.78  | 338.87  | 1.42 | 1389530_at   | Slc35e1    | solute carrier family 35, member E1                                                                                                                    |
| 0.00 | 0.02 | 111.10  | 78.41   | 1.42 | 1371071_at   | Gnb4       | guanine nucleotide binding protein (G protein), beta polypeptide 4                                                                                     |
| 0.00 | 0.03 | 84.85   | 60.04   | 1.41 | 1391112_at   | Ggta1      | glycoprotein, alpha-galactosyltransferase 1                                                                                                            |
| 0.00 | 0.03 | 149.98  | 106.16  | 1.41 | 1370049_at   | Smpd2      | sphingomyelin phosphodiesterase 2, neutral                                                                                                             |
| 0.00 | 0.03 | 212.42  | 151.87  | 1.40 | 1374068_at   | Vps39      | vacuolar protein sorting 39 homolog (S. cerevisiae)                                                                                                    |
| 0.00 | 0.01 | 929.58  | 665.69  | 1.40 | 1370305_at   | Yif1       | Yip1 interacting factor homolog (S. cerevisiae)                                                                                                        |
| 0.00 | 0.03 | 30.01   | 21.50   | 1.40 | 1383128_at   | Rpl5       | ribosomal protein L5                                                                                                                                   |
| 0.00 | 0.02 | 2703.64 | 1936.79 | 1.40 | 1398892_at   | Npc2       | Niemann-Pick disease, type C2                                                                                                                          |
| 0.00 | 0.01 | 338.39  | 242.85  | 1.39 | 1370916_at   | Tec        | tec protein tyrosine kinase                                                                                                                            |
| 0.00 | 0.03 | 109.49  | 78.65   | 1.39 | 1389219_at   | LOC679692  | similar to lysophosphatidylglycerol acyltransferase 1                                                                                                  |
| 0.00 | 0.02 | 1160.74 | 835.52  | 1.39 | 1371880_at   | Sp1        | Sp1 transcription factor                                                                                                                               |

|      |      |         |         |      |              |            |                                                                                     |
|------|------|---------|---------|------|--------------|------------|-------------------------------------------------------------------------------------|
| 0.00 | 0.04 | 34.48   | 24.84   | 1.39 | 1380064_at   | NA         | NA                                                                                  |
| 0.00 | 0.02 | 400.42  | 289.17  | 1.38 | 1388813_at   | Arf2       | ADP-ribosylation factor 2                                                           |
| 0.00 | 0.03 | 535.70  | 387.14  | 1.38 | 1378160_at   | Frrs1      | ferric-chelate reductase 1                                                          |
| 0.00 | 0.02 | 1186.24 | 857.42  | 1.38 | 1367922_at   | Adam17     | ADAM metallopeptidase domain 17                                                     |
| 0.00 | 0.00 | 195.91  | 141.68  | 1.38 | 1385839_x_at | Tm2d1      | TM2 domain containing 1                                                             |
| 0.00 | 0.02 | 5613.46 | 4060.63 | 1.38 | 1371644_at   | Twf1       | twinfilin, actin-binding protein, homolog 1 (Drosophila)                            |
| 0.00 | 0.02 | 33.53   | 24.36   | 1.38 | 1382036_at   | Tln1       | talin 1                                                                             |
| 0.00 | 0.02 | 487.32  | 354.69  | 1.37 | 1383674_at   | Tmem219    | transmembrane protein 219                                                           |
| 0.00 | 0.03 | 67.72   | 49.32   | 1.37 | 1382917_at   | NA         | NA                                                                                  |
| 0.00 | 0.03 | 119.31  | 87.90   | 1.36 | 1375015_at   | NA         | NA                                                                                  |
| 0.00 | 0.03 | 138.21  | 102.14  | 1.35 | 1396062_at   | NA         | NA                                                                                  |
| 0.00 | 0.03 | 682.10  | 504.17  | 1.35 | 1375938_at   | Ccdc12     | coiled-coil domain containing 12                                                    |
| 0.00 | 0.02 | 372.78  | 275.58  | 1.35 | 1385208_at   | RGD1305014 | similar to RIKEN cDNA 2310057M21                                                    |
| 0.00 | 0.01 | 210.73  | 155.96  | 1.35 | 1394460_at   | NA         | NA                                                                                  |
| 0.00 | 0.03 | 267.37  | 198.03  | 1.35 | 1389700_at   | NA         | NA                                                                                  |
| 0.00 | 0.00 | 246.69  | 182.96  | 1.35 | 1380857_at   | Pde12      | phosphodiesterase 12                                                                |
| 0.00 | 0.01 | 230.24  | 171.74  | 1.34 | 1375435_at   | RGD1311021 | hypothetical LOC308765                                                              |
| 0.00 | 0.02 | 2845.12 | 2122.92 | 1.34 | 1389538_at   | Nfkbia     | nuclear factor of kappa light polypeptide gene enhancer in B-cells inhibitor, alpha |
| 0.00 | 0.02 | 345.43  | 259.49  | 1.33 | 1371681_at   | Tox4       | TOX high mobility group box family member 4                                         |
| 0.00 | 0.03 | 338.04  | 254.01  | 1.33 | 1373542_at   | Sphk2      | sphingosine kinase 2                                                                |
| 0.00 | 0.03 | 395.47  | 298.11  | 1.33 | 1376073_at   | Sel1l      | sel-1 suppressor of lin-12-like (C. elegans)                                        |
| 0.00 | 0.03 | 58.63   | 44.32   | 1.32 | 1384948_at   | Trps1      | trichorhinophalangeal syndrome I homolog (human)                                    |
| 0.00 | 0.02 | 1349.63 | 1025.49 | 1.32 | 1398952_at   | RGD1564093 | similar to RIKEN cDNA 2310036O22                                                    |
| 0.00 | 0.04 | 515.73  | 392.21  | 1.31 | 1372430_at   | RGD1311739 | similar to RIKEN cDNA 1700037H04                                                    |
| 0.00 | 0.03 | 13.38   | 10.23   | 1.31 | 1396217_at   | NA         | NA                                                                                  |
| 0.00 | 0.02 | 16.37   | 12.53   | 1.31 | 1382563_at   | RGD1560818 | similar to hypothetical protein FLJ38944                                            |
| 0.00 | 0.02 | 550.04  | 423.78  | 1.30 | 1369060_a_at | Hdac3      | histone deacetylase 3                                                               |
| 0.00 | 0.03 | 67.99   | 52.61   | 1.29 | 1380241_a_at | Lrp5       | low density lipoprotein receptor-related protein 5                                  |
| 0.00 | 0.03 | 313.29  | 242.84  | 1.29 | 1374997_at   | Map3k11    | mitogen-activated protein kinase kinase kinase 11                                   |
| 0.00 | 0.03 | 1854.15 | 1438.99 | 1.29 | 1387806_at   | Rap1b      | RAP1B, member of RAS oncogene family                                                |
| 0.00 | 0.03 | 357.03  | 277.55  | 1.29 | 1389571_at   | Stat2      | signal transducer and activator of transcription 2                                  |
| 0.00 | 0.02 | 398.08  | 309.53  | 1.29 | 1372987_at   | NA         | NA                                                                                  |
| 0.00 | 0.02 | 4399.20 | 3421.06 | 1.29 | 1370051_at   | Tgm1       | transglutaminase 1, K polypeptide                                                   |
| 0.00 | 0.03 | 144.83  | 112.99  | 1.28 | 1384925_at   | NA         | NA                                                                                  |
| 0.00 | 0.04 | 200.21  | 156.37  | 1.28 | 1390447_at   | Stx3       | syntaxin 3                                                                          |
| 0.00 | 0.02 | 681.45  | 533.46  | 1.28 | 1390228_at   | Aof1       | amine oxidase (flavin containing) domain 1                                          |
| 0.00 | 0.03 | 685.58  | 537.41  | 1.28 | 1374105_at   | Higd1a     | HIG1 domain family, member 1A                                                       |
| 0.00 | 0.02 | 532.41  | 417.89  | 1.27 | 1372853_at   | Rela       | v-rel reticuloendotheliosis viral oncogene homolog A (avian)                        |
| 0.00 | 0.03 | 373.32  | 293.11  | 1.27 | 1387875_at   | Ptk2       | PTK2 protein tyrosine kinase 2                                                      |
| 0.00 | 0.02 | 183.02  | 144.09  | 1.27 | 1375045_at   | NA         | NA                                                                                  |
| 0.00 | 0.02 | 1296.48 | 1027.66 | 1.26 | 1368834_at   | Camk2d     | calcium/calmodulin-dependent protein kinase II delta                                |
| 0.00 | 0.03 | 325.72  | 259.20  | 1.26 | 1367478_at   | Htra2      | HtrA serine peptidase 2                                                             |
| 0.00 | 0.01 | 9.62    | 7.67    | 1.25 | 1376540_at   | NA         | NA                                                                                  |

|      |      |          |          |      |              |            |                                                                                               |
|------|------|----------|----------|------|--------------|------------|-----------------------------------------------------------------------------------------------|
| 0.00 | 0.02 | 604.94   | 485.72   | 1.25 | 1399114_at   | Gtf2e2     | general transcription factor IIE, polypeptide 2, beta                                         |
| 0.00 | 0.03 | 611.30   | 491.43   | 1.24 | 1399049_at   | RGD1308917 | similar to RIKEN cDNA 1200003C05                                                              |
| 0.00 | 0.03 | 130.29   | 105.92   | 1.23 | 1375712_at   | Thoc7      | THO complex 7 homolog (Drosophila)                                                            |
| 0.00 | 0.03 | 1387.33  | 1128.64  | 1.23 | 1375090_at   | NA         | NA                                                                                            |
| 0.00 | 0.03 | 292.87   | 238.63   | 1.23 | 1370440_at   | Slc15a4    | solute carrier family 15, member 4                                                            |
| 0.00 | 0.01 | 921.86   | 752.91   | 1.22 | 1367543_at   | LOC685079  | similar to Protein SYS1 homolog                                                               |
| 0.00 | 0.02 | 1074.62  | 878.84   | 1.22 | 1367546_at   | Mrp143     | mitochondrial ribosomal protein L43                                                           |
| 0.00 | 0.03 | 2365.92  | 1949.22  | 1.21 | 1371346_at   | Ndufb6     | NADH dehydrogenase (ubiquinone) 1 beta subcomplex, 6                                          |
| 0.00 | 0.03 | 436.19   | 362.17   | 1.20 | 1371934_at   | Usp21      | ubiquitin specific peptidase 21                                                               |
| 0.00 | 0.01 | 230.85   | 192.22   | 1.20 | 1371733_at   | Arl8a      | ADP-ribosylation factor-like 8A                                                               |
| 0.00 | 0.03 | 3341.22  | 2790.83  | 1.20 | 1370250_at   | Ube2i      | ubiquitin-conjugating enzyme E2I                                                              |
| 0.00 | 0.03 | 185.07   | 155.29   | 1.19 | 1378041_at   | Abcb8      | ATP-binding cassette, sub-family B (MDR/TAP), member 8                                        |
| 0.00 | 0.01 | 428.21   | 363.91   | 1.18 | 1374402_at   | Eif2ak1    | eukaryotic translation initiation factor 2 alpha kinase 1                                     |
| 0.00 | 0.03 | 277.56   | 236.06   | 1.18 | 1367550_a_at | Tm2d1      | TM2 domain containing 1                                                                       |
| 0.00 | 0.02 | 5893.84  | 5104.64  | 1.15 | 1371511_at   | Arpc2      | actin related protein 2/3 complex, subunit 2                                                  |
| 0.00 | 0.03 | 172.03   | 149.92   | 1.15 | 1389152_at   | Zfyve27    | zinc finger, FYVE domain containing 27                                                        |
| 0.00 | 0.03 | 449.41   | 399.26   | 1.13 | 1374523_at   | Pgls       | 6-phosphogluconolactonase                                                                     |
| 0.00 | 0.03 | 299.54   | 268.12   | 1.12 | 1380309_at   | Vps8       | vacuolar protein sorting 8 homolog (S. cerevisiae)                                            |
| 0.00 | 0.03 | 11622.40 | 10524.21 | 1.10 | 1388449_at   | Eef1b2     | eukaryotic translation elongation factor 1 beta 2                                             |
| 0.00 | 0.03 | 11055.30 | 10446.83 | 1.06 | 1367618_a_at | Gnb211     | guanine nucleotide binding protein (G protein), beta polypeptide 2 like 1                     |
| 0.00 | 0.03 | 46.50    | 1303.59  | 0.04 | 1384236_at   | NA         | NA                                                                                            |
| 0.00 | 0.02 | 371.67   | 9934.66  | 0.04 | 1383203_at   | RGD1559748 | similar to Palate lung and nasal carcinoma-like protein precursor (Tongue plunc-like protein) |
| 0.00 | 0.01 | 37.86    | 658.70   | 0.06 | 1398090_at   | LOC687873  | similar to kallikrein 5 preproprotein                                                         |
| 0.00 | 0.02 | 86.60    | 1128.61  | 0.08 | 1394228_at   | Tmigd1     | transmembrane and immunoglobulin domain containing 1                                          |
| 0.00 | 0.01 | 125.64   | 1465.62  | 0.09 | 1373493_at   | Slurp1     | secreted Ly6/Plaur domain containing 1                                                        |
| 0.00 | 0.03 | 15.16    | 157.98   | 0.10 | 1397903_at   | NA         | NA                                                                                            |
| 0.00 | 0.01 | 135.41   | 1173.77  | 0.12 | 1372390_at   | Apeg3      | antisense paternally expressed gene 3                                                         |
| 0.00 | 0.04 | 88.26    | 739.68   | 0.12 | 1378324_at   | Ttc30b     | tetratricopeptide repeat domain 30B                                                           |
| 0.00 | 0.00 | 37.25    | 260.01   | 0.14 | 1382088_at   | NA         | NA                                                                                            |
| 0.00 | 0.02 | 39.24    | 243.17   | 0.16 | 1392943_at   | Mboat2     | membrane bound O-acyltransferase domain containing 2                                          |
| 0.00 | 0.02 | 51.04    | 306.92   | 0.17 | 1382031_at   | NA         | NA                                                                                            |
| 0.00 | 0.02 | 614.94   | 3166.35  | 0.19 | 1368470_at   | Ggh        | gamma-glutamyl hydrolase                                                                      |
| 0.00 | 0.00 | 1510.68  | 7661.72  | 0.20 | 1381573_at   | RGD1562107 | similar to class-alpha glutathione S-transferase                                              |
| 0.00 | 0.03 | 21.24    | 103.82   | 0.20 | 1371089_at   | Yc2        | glutathione S-transferase Yc2 subunit                                                         |
| 0.00 | 0.02 | 65.66    | 313.35   | 0.21 | 1384392_at   | Cyp26b1    | cytochrome P450, family 26, subfamily b, polypeptide 1                                        |
| 0.00 | 0.03 | 175.77   | 837.31   | 0.21 | 1393684_at   | Hells      | helicase, lymphoid specific                                                                   |
| 0.00 | 0.03 | 389.36   | 1852.75  | 0.21 | 1384180_at   | Ifit2      | interferon-induced protein with tetratricopeptide repeats 2                                   |
| 0.00 | 0.02 | 568.36   | 2575.90  | 0.22 | 1372760_at   | NA         | NA                                                                                            |
| 0.00 | 0.01 | 49.60    | 216.80   | 0.23 | 1379075_at   | Mboat2     | membrane bound O-acyltransferase domain containing 2                                          |
| 0.00 | 0.01 | 86.18    | 356.79   | 0.24 | 1389662_at   | Wnk4       | WNK lysine deficient protein kinase 4                                                         |
| 0.00 | 0.03 | 58.65    | 228.92   | 0.26 | 1383894_at   | NA         | NA                                                                                            |



|      |      |        |         |      |              |            |                                                                                                                                                                     |
|------|------|--------|---------|------|--------------|------------|---------------------------------------------------------------------------------------------------------------------------------------------------------------------|
| 0.00 | 0.02 | 778.79 | 3028.40 | 0.26 | 1387156_at   | Hsd17b2    | hydroxysteroid (17-beta) dehydrogenase 2                                                                                                                            |
| 0.00 | 0.03 | 427.72 | 1654.40 | 0.26 | 1374863_at   | Rbp7       | retinol binding protein 7, cellular                                                                                                                                 |
| 0.00 | 0.01 | 948.60 | 3310.01 | 0.29 | 1387022_at   | Aldh1a1    | aldehyde dehydrogenase 1 family, member A1                                                                                                                          |
| 0.00 | 0.03 | 16.78  | 57.62   | 0.29 | 1369169_at   | Slc23a1    | solute carrier family 23 (nucleobase transporters), member 1                                                                                                        |
| 0.00 | 0.03 | 29.79  | 96.35   | 0.31 | 1383164_at   | NA         | NA                                                                                                                                                                  |
| 0.00 | 0.02 | 129.24 | 401.88  | 0.32 | 1368121_at   | Akr7a3     | aldo-keto reductase family 7, member A3 (aflatoxin aldehyde reductase)                                                                                              |
| 0.00 | 0.01 | 53.42  | 165.38  | 0.32 | 1369179_a_at | Pparg      | peroxisome proliferator-activated receptor gamma                                                                                                                    |
| 0.00 | 0.02 | 60.18  | 182.35  | 0.33 | 1387282_at   | Hspb8      | heat shock protein 8                                                                                                                                                |
| 0.00 | 0.03 | 115.75 | 348.09  | 0.33 | 1394290_at   | NA         | NA                                                                                                                                                                  |
| 0.00 | 0.03 | 232.00 | 694.18  | 0.33 | 1372604_at   | RGD1309808 | similar to apolipoprotein L2; apolipoprotein L-II                                                                                                                   |
| 0.00 | 0.03 | 81.60  | 242.59  | 0.34 | 1369435_at   | Ttpa       | tocopherol (alpha) transfer protein                                                                                                                                 |
| 0.00 | 0.02 | 59.15  | 168.84  | 0.35 | 1374948_at   | Tmem106a   | transmembrane protein 106A                                                                                                                                          |
| 0.00 | 0.02 | 196.51 | 539.06  | 0.36 | 1388721_at   | Hspb8      | heat shock protein 8                                                                                                                                                |
| 0.00 | 0.03 | 269.30 | 733.85  | 0.37 | 1384993_at   | RGD1309847 | similar to peptidylglycine alpha-amidating monooxygenase COOH-terminal interactor; peptidylglycine alpha-amidating monooxygenase COOH-terminal interactor protein-1 |
| 0.00 | 0.01 | 24.96  | 67.41   | 0.37 | 1395052_at   | NA         | NA                                                                                                                                                                  |
| 0.00 | 0.03 | 857.40 | 2311.63 | 0.37 | 1367702_at   | Acadm      | acyl-Coenzyme A dehydrogenase, C-4 to C-12 straight chain                                                                                                           |
| 0.00 | 0.02 | 278.99 | 749.46  | 0.37 | 1386075_at   | Mina       | myc induced nuclear antigen                                                                                                                                         |
| 0.00 | 0.01 | 346.42 | 911.72  | 0.38 | 1372449_at   | NA         | NA                                                                                                                                                                  |
| 0.00 | 0.01 | 192.63 | 501.49  | 0.38 | 1379934_at   | NA         | NA                                                                                                                                                                  |
| 0.00 | 0.02 | 87.88  | 225.05  | 0.39 | 1375818_at   | Lactb      | lactamase, beta                                                                                                                                                     |
| 0.00 | 0.02 | 153.83 | 392.99  | 0.39 | 1381597_at   | NA         | NA                                                                                                                                                                  |
| 0.00 | 0.02 | 26.15  | 66.39   | 0.39 | 1382775_at   | Ryr2       | ryanodine receptor 2, cardiac                                                                                                                                       |
| 0.00 | 0.03 | 735.18 | 1818.95 | 0.40 | 1368132_at   | Tob1       | transducer of ErbB-2.1                                                                                                                                              |
| 0.00 | 0.01 | 279.89 | 683.82  | 0.41 | 1374176_at   | RGD1308059 | similar to DNA segment, Chr 4, Brigham & Womens Genetics 0951 expressed                                                                                             |
| 0.00 | 0.03 | 305.00 | 740.67  | 0.41 | 1382255_at   | NA         | NA                                                                                                                                                                  |
| 0.00 | 0.01 | 96.93  | 231.67  | 0.42 | 1397452_at   | NA         | NA                                                                                                                                                                  |
| 0.00 | 0.03 | 205.49 | 483.91  | 0.42 | 1375990_a_at | NA         | NA                                                                                                                                                                  |
| 0.00 | 0.03 | 844.95 | 1985.86 | 0.43 | 1389014_at   | Nampt      | nicotinamide phosphoribosyltransferase                                                                                                                              |
| 0.00 | 0.01 | 277.35 | 643.03  | 0.43 | 1390819_at   | Tef        | thyrotrophic embryonic factor                                                                                                                                       |
| 0.00 | 0.01 | 49.03  | 113.62  | 0.43 | 1380402_at   | NA         | NA                                                                                                                                                                  |
| 0.00 | 0.03 | 124.96 | 289.08  | 0.43 | 1398287_at   | Plau       | plasminogen activator, urokinase                                                                                                                                    |
| 0.00 | 0.00 | 118.59 | 274.28  | 0.43 | 1396403_at   | RGD1311595 | similar to KIAA2026 protein                                                                                                                                         |
| 0.00 | 0.03 | 504.57 | 1163.78 | 0.43 | 1389351_at   | Lrrfp1     | leucine rich repeat (in FLII) interacting protein 1                                                                                                                 |
| 0.00 | 0.01 | 168.75 | 388.34  | 0.43 | 1393634_at   | Nrg4       | neuregulin 4                                                                                                                                                        |
| 0.00 | 0.03 | 918.79 | 2111.64 | 0.44 | 1398343_at   | Dnaja4     | DnaJ (Hsp40) homolog, subfamily A, member 4                                                                                                                         |
| 0.00 | 0.03 | 59.56  | 136.77  | 0.44 | 1393437_at   | NA         | NA                                                                                                                                                                  |
| 0.00 | 0.02 | 116.74 | 264.92  | 0.44 | 1387753_s_at | Magi3      | membrane associated guanylate kinase, WW and PDZ domain containing 3                                                                                                |
| 0.00 | 0.02 | 264.90 | 598.20  | 0.44 | 1372103_at   | LOC498996  | similar to DnaJ (Hsp40) homolog, subfamily A, member 4                                                                                                              |
| 0.00 | 0.00 | 381.82 | 860.35  | 0.44 | 1383353_at   | NA         | NA                                                                                                                                                                  |
| 0.00 | 0.01 | 20.05  | 45.03   | 0.45 | 1380465_at   | NA         | NA                                                                                                                                                                  |

|      |      |         |         |      |            |            |                                                                                              |
|------|------|---------|---------|------|------------|------------|----------------------------------------------------------------------------------------------|
| 0.00 | 0.03 | 21.74   | 48.43   | 0.45 | 1384210_at | Micalcl    | MICAL C-terminal like                                                                        |
| 0.00 | 0.04 | 105.90  | 229.71  | 0.46 | 1384263_at | Tmem161b   | transmembrane protein 161B                                                                   |
| 0.00 | 0.02 | 1045.41 | 2263.78 | 0.46 | 1372500_at | Tmod3      | tropomodulin 3                                                                               |
| 0.00 | 0.02 | 131.12  | 283.59  | 0.46 | 1376411_at | Arl13b     | ADP-ribosylation factor-like 13B                                                             |
| 0.00 | 0.03 | 25.10   | 53.87   | 0.47 | 1393279_at | NA         | NA                                                                                           |
| 0.00 | 0.02 | 675.06  | 1434.14 | 0.47 | 1373986_at | NA         | NA                                                                                           |
| 0.00 | 0.02 | 2124.85 | 4466.96 | 0.48 | 1377662_at | Pir        | pirin (iron-binding nuclear protein)                                                         |
| 0.00 | 0.03 | 419.87  | 874.26  | 0.48 | 1367960_at | Arl4a      | ADP-ribosylation factor-like 4A                                                              |
| 0.00 | 0.02 | 336.80  | 700.07  | 0.48 | 1374278_at | RGD1307696 | similar to dJ881L22.2 (novel protein)                                                        |
| 0.00 | 0.03 | 527.28  | 1092.71 | 0.48 | 1398600_at | NA         | NA                                                                                           |
| 0.00 | 0.02 | 577.11  | 1192.65 | 0.48 | 1384254_at | Otud1      | OTU domain containing 1                                                                      |
| 0.00 | 0.02 | 73.20   | 148.11  | 0.49 | 1374073_at | Slc46a1    | solute carrier family 46, member 1                                                           |
| 0.00 | 0.03 | 90.15   | 182.23  | 0.49 | 1391184_at | Rfx2       | regulatory factor X, 2 (influences HLA class II expression)                                  |
| 0.00 | 0.03 | 29.68   | 59.31   | 0.50 | 1378333_at | NA         | NA                                                                                           |
| 0.00 | 0.03 | 127.00  | 253.03  | 0.50 | 1377818_at | NA         | NA                                                                                           |
| 0.00 | 0.02 | 274.36  | 544.38  | 0.50 | 1383573_at | Tshz1      | teashirt zinc finger homeobox 1                                                              |
| 0.00 | 0.03 | 116.20  | 229.30  | 0.51 | 1378987_at | NA         | NA                                                                                           |
| 0.00 | 0.01 | 617.08  | 1192.88 | 0.52 | 1378679_at | Usp25      | ubiquitin specific peptidase 25                                                              |
| 0.00 | 0.01 | 405.99  | 780.60  | 0.52 | 1381279_at | Ripk2      | receptor-interacting serine-threonine kinase 2                                               |
| 0.00 | 0.02 | 588.47  | 1131.06 | 0.52 | 1370054_at | Cdkn2c     | cyclin-dependent kinase inhibitor 2C (p18, inhibits CDK4)                                    |
| 0.00 | 0.02 | 624.00  | 1197.20 | 0.52 | 1372774_at | Coq6       | coenzyme Q6 homolog (yeast)                                                                  |
| 0.00 | 0.03 | 122.31  | 232.77  | 0.53 | 1383212_at | NA         | NA                                                                                           |
| 0.00 | 0.03 | 207.49  | 392.02  | 0.53 | 1380321_at | Mtus1      | mitochondrial tumor suppressor 1                                                             |
| 0.00 | 0.03 | 207.64  | 390.87  | 0.53 | 1384916_at | NA         | NA                                                                                           |
| 0.00 | 0.03 | 50.92   | 95.17   | 0.54 | 1369919_at | Tef        | thyrotrophic embryonic factor                                                                |
| 0.00 | 0.00 | 100.02  | 186.85  | 0.54 | 1371091_at | Irs2       | insulin receptor substrate 2                                                                 |
| 0.00 | 0.02 | 68.65   | 127.60  | 0.54 | 1396275_at | Dusp18     | dual specificity phosphatase 18                                                              |
| 0.00 | 0.03 | 159.79  | 296.66  | 0.54 | 1368115_at | Cldn3      | claudin 3                                                                                    |
| 0.00 | 0.02 | 4781.11 | 8870.02 | 0.54 | 1398688_at | Spink5     | serine peptidase inhibitor, Kazal type 5                                                     |
| 0.00 | 0.03 | 126.85  | 234.91  | 0.54 | 1372976_at | Abhd14a    | abhydrolase domain containing 14A                                                            |
| 0.00 | 0.02 | 482.13  | 890.25  | 0.54 | 1390508_at | NA         | NA                                                                                           |
| 0.00 | 0.02 | 34.74   | 63.84   | 0.54 | 1377523_at | LOC686314  | similar to dachshund b                                                                       |
| 0.00 | 0.01 | 200.72  | 368.89  | 0.54 | 1372554_at | Tmem131    | transmembrane protein 131                                                                    |
| 0.00 | 0.00 | 61.69   | 113.09  | 0.55 | 1376667_at | Cyp26b1    | cytochrome P450, family 26, subfamily b, polypeptide 1                                       |
| 0.00 | 0.02 | 138.03  | 251.82  | 0.55 | 1392157_at | Plxna2     | plexin A2                                                                                    |
| 0.00 | 0.03 | 85.08   | 154.93  | 0.55 | 1384570_at | Plekha4    | pleckstrin homology domain containing, family A (phosphoinositide binding specific) member 4 |
| 0.00 | 0.03 | 118.41  | 215.26  | 0.55 | 1370932_at | Lrp4       | low density lipoprotein receptor-related protein 4                                           |
| 0.00 | 0.02 | 17.67   | 31.98   | 0.55 | 1382983_at | NA         | NA                                                                                           |
| 0.00 | 0.03 | 47.78   | 86.41   | 0.55 | 1387672_at | Gnmt       | glycine N-methyltransferase                                                                  |
| 0.00 | 0.03 | 61.88   | 111.81  | 0.55 | 1369325_at | Lyst       | lysosomal trafficking regulator                                                              |
| 0.00 | 0.01 | 64.02   | 114.85  | 0.56 | 1386569_at | NA         | NA                                                                                           |
| 0.00 | 0.03 | 219.25  | 393.24  | 0.56 | 1398409_at | NA         | NA                                                                                           |
| 0.00 | 0.02 | 17.02   | 30.47   | 0.56 | 1379445_at | NA         | NA                                                                                           |
| 0.00 | 0.03 | 386.39  | 688.23  | 0.56 | 1377934_at | NA         | NA                                                                                           |
| 0.00 | 0.02 | 684.87  | 1207.53 | 0.57 | 1390763_at | NA         | NA                                                                                           |

|      |      |         |          |      |              |            |                                                                                       |
|------|------|---------|----------|------|--------------|------------|---------------------------------------------------------------------------------------|
| 0.00 | 0.03 | 145.31  | 255.30   | 0.57 | 1376863_at   | NA         | NA                                                                                    |
| 0.00 | 0.03 | 235.74  | 413.17   | 0.57 | 1389456_at   | NA         | NA                                                                                    |
| 0.00 | 0.02 | 71.70   | 125.17   | 0.57 | 1398452_at   | RGD1559923 | similar to chromosome 14 open reading frame 35                                        |
| 0.00 | 0.01 | 127.18  | 221.70   | 0.57 | 1389403_at   | Bmp7       | bone morphogenetic protein 7                                                          |
| 0.00 | 0.02 | 23.67   | 41.25    | 0.57 | 1378339_at   | Fam124a    | family with sequence similarity 124A                                                  |
| 0.00 | 0.02 | 94.31   | 162.28   | 0.58 | 1383149_at   | LOC684122  | similar to development and differentiation enhancing factor-like 1                    |
| 0.00 | 0.02 | 119.13  | 204.90   | 0.58 | 1390522_at   | Fbxl11     | F-box and leucine-rich repeat protein 11                                              |
| 0.00 | 0.03 | 30.31   | 51.94    | 0.58 | 1368696_at   | Fxyd7      | FXD domain-containing ion transport regulator 7                                       |
| 0.00 | 0.03 | 1031.31 | 1765.55  | 0.58 | 1369968_at   | Ptn        | pleiotrophin                                                                          |
| 0.00 | 0.04 | 955.99  | 1632.76  | 0.59 | 1370357_at   | Slc30a4    | solute carrier family 30 (zinc transporter), member 4                                 |
| 0.00 | 0.02 | 8667.95 | 14799.25 | 0.59 | 1367577_at   | Hspb1      | heat shock protein 1                                                                  |
| 0.00 | 0.01 | 375.31  | 636.65   | 0.59 | 1379942_at   | Sox2       | SRY (sex determining region Y)-box 2                                                  |
| 0.00 | 0.01 | 410.24  | 689.06   | 0.60 | 1370541_at   | Nr1d2      | nuclear receptor subfamily 1, group D, member 2                                       |
| 0.00 | 0.00 | 839.41  | 1401.74  | 0.60 | 1368702_at   | Pawr       | PRKC, apoptosis, WT1, regulator                                                       |
| 0.00 | 0.02 | 127.42  | 212.63   | 0.60 | 1387266_at   | Siah1a     | seven in absentia 1A                                                                  |
| 0.00 | 0.03 | 1355.75 | 2259.71  | 0.60 | 1369998_at   | Arf6       | ADP-ribosylation factor 6                                                             |
| 0.00 | 0.01 | 43.95   | 73.05    | 0.60 | 1380193_at   | NA         | NA                                                                                    |
| 0.00 | 0.03 | 1760.88 | 2925.65  | 0.60 | 1384244_at   | Hsd12      | hydroxysteroid dehydrogenase like 2                                                   |
| 0.00 | 0.02 | 38.63   | 64.08    | 0.60 | 1392658_at   | Tcea1      | transcription elongation factor A (SII) 1                                             |
| 0.00 | 0.03 | 169.45  | 278.92   | 0.61 | 1379982_at   | NA         | NA                                                                                    |
| 0.00 | 0.03 | 96.58   | 158.89   | 0.61 | 1382032_at   | NA         | NA                                                                                    |
| 0.00 | 0.03 | 57.12   | 93.66    | 0.61 | 1388456_at   | S100a1     | S100 calcium binding protein A1                                                       |
| 0.00 | 0.03 | 98.33   | 160.89   | 0.61 | 1384945_at   | Fytd1      | forty-two-three domain containing 1                                                   |
| 0.00 | 0.03 | 1238.93 | 2022.41  | 0.61 | 1375641_at   | Arpc5l     | actin related protein 2/3 complex, subunit 5-like                                     |
| 0.00 | 0.01 | 22.09   | 36.04    | 0.61 | 1381887_x_at | RGD1311595 | similar to KIAA2026 protein                                                           |
| 0.00 | 0.03 | 244.51  | 394.57   | 0.62 | 1387148_at   | Gprasp1    | G protein-coupled receptor associated sorting protein 1                               |
| 0.00 | 0.03 | 830.63  | 1340.37  | 0.62 | 1376587_at   | Fbxo11     | F-box protein 11                                                                      |
| 0.00 | 0.03 | 179.85  | 284.99   | 0.63 | 1384172_at   | RGD1310474 | similar to KIAA0423                                                                   |
| 0.00 | 0.02 | 42.39   | 66.85    | 0.63 | 1379577_at   | RGD1559441 | similar to MIC2L1                                                                     |
| 0.00 | 0.01 | 650.31  | 1023.24  | 0.64 | 1379226_at   | Aim1l      | absent in melanoma 1-like                                                             |
| 0.00 | 0.03 | 15.11   | 23.62    | 0.64 | 1384675_at   | Apeg3      | antisense paternally expressed gene 3                                                 |
| 0.00 | 0.02 | 511.39  | 796.30   | 0.64 | 1387784_at   | Psm10      | proteasome (prosome, macropain) 26S subunit, non-ATPase, 10                           |
| 0.00 | 0.03 | 393.27  | 610.98   | 0.64 | 1382309_at   | NA         | NA                                                                                    |
| 0.00 | 0.03 | 30.63   | 47.52    | 0.64 | 1391617_at   | NA         | NA                                                                                    |
| 0.00 | 0.01 | 35.95   | 55.49    | 0.65 | 1381396_s_at | Klf15      | Kruppel-like factor 15                                                                |
| 0.00 | 0.02 | 141.64  | 218.27   | 0.65 | 1369974_at   | Vamp2      | vesicle-associated membrane protein 2                                                 |
| 0.00 | 0.03 | 757.49  | 1164.13  | 0.65 | 1373836_at   | Fytd1      | forty-two-three domain containing 1                                                   |
| 0.00 | 0.02 | 1195.99 | 1837.83  | 0.65 | 1372091_at   | Mid1ip1    | MID1 interacting protein 1 (gastrulation specific G12 homolog (zebrafish))            |
| 0.00 | 0.03 | 24.27   | 37.24    | 0.65 | 1397506_at   | Fxn        | frataxin                                                                              |
| 0.00 | 0.02 | 5848.65 | 8931.03  | 0.65 | 1370235_at   | Dbi        | diazepam binding inhibitor (GABA receptor modulator, acyl-Coenzyme A binding protein) |
| 0.00 | 0.03 | 220.69  | 336.17   | 0.66 | 1370974_at   | Vps54      | vacuolar protein sorting 54 homolog (S. cerevisiae)                                   |
| 0.00 | 0.02 | 1565.29 | 2379.93  | 0.66 | 1367619_at   | Pgrmc1     | progesterone receptor membrane component 1                                            |

|      |      |         |          |      |              |            |                                                                                |
|------|------|---------|----------|------|--------------|------------|--------------------------------------------------------------------------------|
| 0.00 | 0.02 | 33.01   | 49.90    | 0.66 | 1398196_at   | NA         | NA                                                                             |
| 0.00 | 0.02 | 90.31   | 136.36   | 0.66 | 1393666_at   | NA         | NA                                                                             |
| 0.00 | 0.02 | 33.87   | 51.04    | 0.66 | 1389848_at   | Arhgap23   | Rho GTPase activating protein 23                                               |
| 0.00 | 0.01 | 1456.86 | 2194.05  | 0.66 | 1398909_at   | LOC301124  | hypothetical LOC301124                                                         |
| 0.00 | 0.03 | 959.65  | 1444.16  | 0.66 | 1391880_at   | NA         | NA                                                                             |
| 0.00 | 0.03 | 132.79  | 198.90   | 0.67 | 1390990_at   | NA         | NA                                                                             |
| 0.00 | 0.01 | 16.45   | 24.63    | 0.67 | 1369911_at   | Cxcr5      | chemokine (C-X-C motif) receptor 5                                             |
| 0.00 | 0.03 | 108.82  | 162.74   | 0.67 | 1383737_at   | NA         | NA                                                                             |
| 0.00 | 0.03 | 28.02   | 41.73    | 0.67 | 1392034_at   | NA         | NA                                                                             |
| 0.00 | 0.02 | 33.94   | 50.53    | 0.67 | 1380348_at   | Wnt9a      | wingless-type MMTV integration site family, member 9A                          |
| 0.00 | 0.03 | 505.34  | 752.27   | 0.67 | 1396692_at   | RGD1306402 | similar to RIKEN cDNA 4933435A13                                               |
| 0.00 | 0.00 | 1525.49 | 2255.88  | 0.68 | 1369980_s_at | Mprip      | myosin phosphatase Rho interacting protein                                     |
| 0.00 | 0.03 | 222.83  | 326.40   | 0.68 | 1386632_at   | Tmem55a    | transmembrane protein 55A                                                      |
| 0.00 | 0.04 | 84.13   | 122.99   | 0.68 | 1376779_at   | Foxo1      | forkhead box O1                                                                |
| 0.00 | 0.03 | 1588.85 | 2319.48  | 0.69 | 1367824_at   | Fnta       | farnesyltransferase, CAAX box, alpha                                           |
| 0.00 | 0.02 | 657.69  | 960.11   | 0.69 | 1374447_at   | Usp9x      | ubiquitin specific peptidase 9, X-linked                                       |
| 0.00 | 0.01 | 8094.69 | 11796.71 | 0.69 | 1368017_at   | Lgals7     | lectin, galactoside-binding, soluble, 7                                        |
| 0.00 | 0.02 | 11.34   | 16.52    | 0.69 | 1398015_at   | NA         | NA                                                                             |
| 0.00 | 0.02 | 20.44   | 29.72    | 0.69 | 1375026_at   | Calml4     | calmodulin-like 4                                                              |
| 0.00 | 0.01 | 1402.29 | 2015.96  | 0.70 | 1399011_at   | Cops6      | COP9 constitutive photomorphogenic homolog subunit 6 (Arabidopsis)             |
| 0.00 | 0.01 | 427.78  | 614.52   | 0.70 | 1368859_at   | Ppm1a      | protein phosphatase 1A, magnesium dependent, alpha isoform                     |
| 0.00 | 0.03 | 248.55  | 356.51   | 0.70 | 1386989_at   | S1pr2      | sphingosine-1-phosphate receptor 2                                             |
| 0.00 | 0.02 | 248.74  | 356.69   | 0.70 | 1382100_at   | RGD1309605 | similar to RIKEN cDNA 2310047O13                                               |
| 0.00 | 0.02 | 276.04  | 395.52   | 0.70 | 1383769_at   | NA         | NA                                                                             |
| 0.00 | 0.03 | 132.01  | 189.01   | 0.70 | 1389665_at   | Habp4      | hyaluronan binding protein 4                                                   |
| 0.00 | 0.02 | 197.82  | 282.79   | 0.70 | 1393170_at   | RGD1561431 | similar to homeobox-containing transcription factor                            |
| 0.00 | 0.02 | 27.11   | 38.73    | 0.70 | 1387184_at   | Axin2      | axin2                                                                          |
| 0.00 | 0.01 | 172.50  | 245.90   | 0.70 | 1392985_at   | Arih1      | ariadne ubiquitin-conjugating enzyme E2 binding protein homolog 1 (Drosophila) |
| 0.00 | 0.02 | 8.71    | 12.40    | 0.70 | 1370513_at   | Tpm1       | tropomyosin 1, alpha                                                           |
| 0.00 | 0.03 | 655.72  | 932.32   | 0.70 | 1372741_at   | Sccpdh     | saccharopine dehydrogenase (putative)                                          |
| 0.00 | 0.02 | 137.35  | 195.14   | 0.70 | 1390841_at   | NA         | NA                                                                             |
| 0.00 | 0.03 | 316.93  | 449.88   | 0.70 | 1372779_at   | B3gnt2     | UDP-GlcNAc:betaGal beta-1,3-N-acetylglucosaminyltransferase 2                  |
| 0.00 | 0.03 | 737.11  | 1039.05  | 0.71 | 1377702_at   | P2ry5      | purinergic receptor P2Y, G-protein coupled, 5                                  |
| 0.00 | 0.03 | 133.45  | 188.07   | 0.71 | 1372557_at   | Arl6       | ADP-ribosylation factor-like 6                                                 |
| 0.00 | 0.03 | 175.54  | 247.31   | 0.71 | 1397888_at   | NA         | NA                                                                             |
| 0.00 | 0.00 | 784.45  | 1103.64  | 0.71 | 1380580_at   | NA         | NA                                                                             |
| 0.00 | 0.01 | 283.47  | 396.60   | 0.71 | 1374696_at   | NA         | NA                                                                             |
| 0.00 | 0.01 | 626.09  | 874.48   | 0.72 | 1373974_at   | Osbp       | oxysterol binding protein                                                      |
| 0.00 | 0.03 | 6.70    | 9.32     | 0.72 | 1396682_at   | NA         | NA                                                                             |
| 0.00 | 0.03 | 17.21   | 23.90    | 0.72 | 1398266_a_at | Egr2       | early growth response 2                                                        |
| 0.00 | 0.02 | 19.22   | 26.58    | 0.72 | 1389982_at   | Lhx1       | LIM homeobox 1                                                                 |
| 0.00 | 0.02 | 22.48   | 31.03    | 0.72 | 1397243_at   | NA         | NA                                                                             |
| 0.00 | 0.01 | 305.34  | 420.86   | 0.73 | 1396170_at   | Wbp4       | WW domain binding protein 4 (formin binding protein 21)                        |

|      |      |         |         |      |            |            |                                                                         |
|------|------|---------|---------|------|------------|------------|-------------------------------------------------------------------------|
| 0.00 | 0.02 | 175.82  | 242.32  | 0.73 | 1370330_at | Sipa111    | signal-induced proliferation-associated 1 like 1                        |
| 0.00 | 0.03 | 19.54   | 26.90   | 0.73 | 1375499_at | NA         | NA                                                                      |
| 0.00 | 0.02 | 2610.29 | 3571.00 | 0.73 | 1371253_at | Etfa       | electron-transfer-flavoprotein, alpha polypeptide                       |
| 0.00 | 0.02 | 39.33   | 53.78   | 0.73 | 1375876_at | RGD1308049 | similar to RIKEN cDNA 2410004C24                                        |
| 0.00 | 0.02 | 102.66  | 140.27  | 0.73 | 1392421_at | Baz2b      | bromodomain adjacent to zinc finger domain, 2B                          |
| 0.00 | 0.03 | 414.96  | 564.00  | 0.74 | 1376082_at | Evi1       | ecotropic viral integration site 1                                      |
| 0.00 | 0.03 | 7.34    | 9.91    | 0.74 | 1397850_at | NA         | NA                                                                      |
| 0.00 | 0.02 | 264.76  | 357.03  | 0.74 | 1373643_at | NA         | NA                                                                      |
| 0.00 | 0.03 | 524.62  | 707.23  | 0.74 | 1389233_at | Reps1      | RALBP1 associated Eps domain containing 1                               |
| 0.00 | 0.01 | 5148.92 | 6940.09 | 0.74 | 1390208_at | Htatip2    | HIV-1 tat interactive protein 2, homolog (human)                        |
| 0.00 | 0.03 | 185.23  | 245.74  | 0.75 | 1374553_at | Fam32a     | family with sequence similarity 32, member A                            |
| 0.00 | 0.01 | 187.04  | 246.46  | 0.76 | 1374169_at | RGD1310686 | similar to chromosome 16 open reading frame 5                           |
| 0.00 | 0.03 | 342.93  | 450.80  | 0.76 | 1372596_at | RGD1311660 | similar to RIKEN cDNA 1110007L15                                        |
| 0.00 | 0.03 | 72.27   | 94.78   | 0.76 | 1380594_at | Scube1     | signal peptide, CUB domain, EGF-like 1                                  |
| 0.00 | 0.03 | 15.34   | 20.08   | 0.76 | 1370268_at | Kcna5      | potassium voltage-gated channel, shaker-related subfamily, member 5     |
| 0.00 | 0.02 | 6.69    | 8.67    | 0.77 | 1385127_at | Bmp5       | bone morphogenetic protein 5                                            |
| 0.00 | 0.01 | 7.32    | 9.45    | 0.77 | 1392290_at | NA         | NA                                                                      |
| 0.00 | 0.03 | 1058.52 | 1363.14 | 0.78 | 1372787_at | Utp3       | UTP3, small subunit (SSU) processome component, homolog (S. cerevisiae) |
| 0.00 | 0.01 | 1226.05 | 1575.22 | 0.78 | 1375425_at | Ift20      | intraflagellar transport 20 homolog (Chlamydomonas)                     |
| 0.00 | 0.02 | 11.02   | 14.10   | 0.78 | 1380657_at | NA         | NA                                                                      |
| 0.00 | 0.02 | 7.85    | 9.97    | 0.79 | 1382650_at | NA         | NA                                                                      |
| 0.00 | 0.03 | 89.88   | 114.00  | 0.79 | 1397846_at | Cby1       | chibby homolog 1 (Drosophila)                                           |
| 0.00 | 0.02 | 2931.69 | 3704.97 | 0.79 | 1374513_at | Sep-07     | septin 7                                                                |
| 0.00 | 0.03 | 1377.55 | 1732.15 | 0.80 | 1387915_at | Sels       | selenoprotein S                                                         |
| 0.00 | 0.03 | 745.28  | 936.25  | 0.80 | 1393236_at | Riok3      | RIO kinase 3 (yeast)                                                    |
| 0.00 | 0.02 | 81.53   | 101.78  | 0.80 | 1397411_at | Fgd2       | FYVE, RhoGEF and PH domain containing 2                                 |
| 0.00 | 0.01 | 4308.73 | 5314.14 | 0.81 | 1398770_at | Rpl36al    | ribosomal protein L36a-like                                             |
| 0.00 | 0.01 | 1344.61 | 1649.83 | 0.81 | 1388563_at | Gbp1       | GC-rich promoter binding protein 1                                      |
| 0.00 | 0.01 | 2369.31 | 2888.52 | 0.82 | 1389305_at | Anxa4      | annexin A4                                                              |
| 0.00 | 0.03 | 5.40    | 6.52    | 0.83 | 1381633_at | NA         | NA                                                                      |
| 0.00 | 0.03 | 10.48   | 12.61   | 0.83 | 1374966_at | Dcx        | doublecortin                                                            |
| 0.00 | 0.03 | 1205.69 | 1449.95 | 0.83 | 1388761_at | Hdac1      | histone deacetylase 1                                                   |
| 0.00 | 0.03 | 20.67   | 24.80   | 0.83 | 1394777_at | NA         | NA                                                                      |
| 0.00 | 0.03 | 778.57  | 930.28  | 0.84 | 1372862_at | Rab22a     | RAB22A, member RAS oncogene family                                      |
| 0.00 | 0.03 | 3824.57 | 4530.08 | 0.84 | 1372437_at | Skp1       | S-phase kinase-associated protein 1                                     |
| 0.00 | 0.03 | 8.57    | 10.13   | 0.85 | 1383511_at | NA         | NA                                                                      |
| 0.00 | 0.03 | 200.90  | 237.21  | 0.85 | 1395362_at | NA         | NA                                                                      |
| 0.00 | 0.03 | 673.99  | 791.54  | 0.85 | 1373505_at | LOC684800  | similar to stromal membrane-associated protein 1                        |
| 0.00 | 0.03 | 47.04   | 54.43   | 0.86 | 1373261_at | NA         | NA                                                                      |
| 0.00 | 0.03 | 203.52  | 233.67  | 0.87 | 1374201_at | NA         | NA                                                                      |

**Dataset 30** Comparison of the expression profile of ZS esophagus at tumor endpoint with the published esophageal profile<sup>‡</sup> at 6 wks of ZS diet

Description of the problem:

Number of classes: 2

Number of genes used for random variance estimation: 31099

Number of genes that passed filtering criteria: 31099

Type of univariate test used: Two-sample T-test (with random variance model)

Univariate test random variance model parameters:

a= 1.90741 , b= 11.98356 , Kolmogorov-Smirnov statistic= 0.0092

Nominal significance level of each univariate test: 0.001

Summary of Results:

Number of genes significant at 0.001 level of the univariate test: 722 (409 up-regulated and 313down-regulated)

Genes that discriminate among classes:

Sorted by Fold-Change

Class 1: ZD esophagus at 5 wks post first NMBA dose

Class 2: ZD esophagus prior to NMBA treatment (Gastroenterology, 2009, 136:953-966)<sup>‡</sup>

\*Fold change represents ZS oesophagus at 5 wks after the first NMBA dose vs ZS esophagus before NMBA treatment.

\*\*Affymetrix probe ID corresponds to the Rat Genome 230 2.0 Array.

Inflammatory probe sets denoted in Table 1 are highlighted in yellow.

| p-value | FDR  | Geom mean of intensities in class 1 | Geom mean of intensities in class 2 | Fold-change* | Affymetrix Probe ID** | Gene Symbol | Gene Name                                                                  |
|---------|------|-------------------------------------|-------------------------------------|--------------|-----------------------|-------------|----------------------------------------------------------------------------|
| 0.00    | 0.04 | 5605.53                             | 180.31                              | 31.09        | 1392402_at            | NA          | NA                                                                         |
| 0.00    | 0.02 | 7010.23                             | 423.86                              | 16.54        | 1384721_at            | NA          | NA                                                                         |
| 0.00    | 0.04 | 654.35                              | 41.75                               | 15.67        | 1377429_at            | Lpo         | lactoperoxidase                                                            |
| 0.00    | 0.00 | 175.38                              | 22.64                               | 7.74         | 1371016_at            | RGD1311300  | similar to T cell receptor V delta 6                                       |
| 0.00    | 0.00 | 505.60                              | 65.89                               | 7.67         | 1389748_at            | NA          | NA                                                                         |
| 0.00    | 0.02 | 498.82                              | 68.78                               | 7.25         | 1385889_at            | RGD1565095  | similar to hypothetical protein MGC52110                                   |
| 0.00    | 0.00 | 126.47                              | 20.01                               | 6.32         | 1385519_at            | Runx1t1     | runt-related transcription factor 1; translocated to, 1 (cyclin D-related) |
| 0.00    | 0.00 | 158.91                              | 25.54                               | 6.22         | 1388275_at            | Tcrb        | T-cell receptor beta chain                                                 |
| 0.00    | 0.02 | 240.16                              | 46.07                               | 5.21         | 1380533_at            | App         | amyloid beta (A4) precursor protein                                        |
| 0.00    | 0.01 | 180.03                              | 34.65                               | 5.20         | 1368482_at            | Bcl2a1d     | B-cell leukemia/lymphoma 2 related protein A1d                             |
| 0.00    | 0.04 | 180.77                              | 35.36                               | 5.11         | 1371170_a_at          | Il1a        | interleukin 1 alpha                                                        |
| 0.00    | 0.04 | 449.46                              | 88.91                               | 5.06         | 1370792_at            | Mapre1      | microtubule-associated protein, RP/EB family, member 1                     |
| 0.00    | 0.00 | 304.03                              | 60.45                               | 5.03         | 1395294_at            | NA          | NA                                                                         |
| 0.00    | 0.01 | 399.36                              | 79.80                               | 5.00         | 1369964_at            | Coro1a      | coronin, actin binding protein 1A                                          |
| 0.00    | 0.02 | 327.97                              | 65.90                               | 4.98         | 1368518_at            | Cd53        | Cd53 molecule                                                              |
| 0.00    | 0.00 | 119.56                              | 24.44                               | 4.89         | 1391979_at            | NA          | NA                                                                         |
| 0.00    | 0.01 | 1334.22                             | 276.63                              | 4.82         | 1370822_at            | RT1-Ba      | RT1 class II, locus Ba                                                     |
| 0.00    | 0.01 | 65.94                               | 15.26                               | 4.32         | 1385925_at            | NA          | NA                                                                         |
| 0.00    | 0.01 | 1221.38                             | 286.80                              | 4.26         | 1393474_at            | Sult2b1     | sulfotransferase family, cytosolic, 2B, member 1                           |
| 0.00    | 0.01 | 274.30                              | 64.64                               | 4.24         | 1391447_at            | NA          | NA                                                                         |
| 0.00    | 0.01 | 58.61                               | 13.84                               | 4.23         | 1395879_at            | Ttc39b      | tetratricopeptide repeat domain 39B                                        |
| 0.00    | 0.00 | 133.45                              | 31.86                               | 4.19         | 1395076_at            | Runx1t1     | runt-related transcription factor 1; translocated to, 1 (cyclin D-related) |
| 0.00    | 0.03 | 748.36                              | 182.20                              | 4.11         | 1387221_at            | Gch1        | GTP cyclohydrolase 1                                                       |
| 0.00    | 0.01 | 134.04                              | 32.73                               | 4.09         | 1368503_at            | Gch1        | GTP cyclohydrolase 1                                                       |
| 0.00    | 0.03 | 244.01                              | 60.86                               | 4.01         | 1368144_at            | Rgs2        | regulator of G-protein signaling 2                                         |
| 0.00    | 0.02 | 414.93                              | 103.94                              | 3.99         | 1387629_at            | Bspry       | B-box and SPRY domain containing                                           |

|      |      |         |         |      |              |            |                                                                            |
|------|------|---------|---------|------|--------------|------------|----------------------------------------------------------------------------|
| 0.00 | 0.02 | 260.00  | 65.46   | 3.97 | 1369670_at   | Cd200      | Cd200 molecule                                                             |
| 0.00 | 0.01 | 550.71  | 142.16  | 3.87 | 1372585_at   | RGD1566254 | RGD1566254                                                                 |
| 0.00 | 0.04 | 327.96  | 86.00   | 3.81 | 1369672_at   | Alox5ap    | arachidonate 5-lipoxygenase activating protein                             |
| 0.00 | 0.01 | 73.22   | 19.30   | 3.79 | 1390890_at   | NA         | NA                                                                         |
| 0.00 | 0.01 | 27.93   | 7.50    | 3.72 | 1385215_at   | Runx1t1    | runt-related transcription factor 1; translocated to, 1 (cyclin D-related) |
| 0.00 | 0.03 | 130.82  | 35.48   | 3.69 | 1370987_at   | Spn        | sialophorin                                                                |
| 0.00 | 0.04 | 186.53  | 50.68   | 3.68 | 1367970_at   | Pfn2       | profilin 2                                                                 |
| 0.00 | 0.00 | 169.72  | 46.94   | 3.62 | 1384787_at   | Cd3g       | CD3 molecule, gamma polypeptide                                            |
| 0.00 | 0.03 | 76.57   | 21.56   | 3.55 | 1369025_at   | Cd5        | Cd5 molecule                                                               |
| 0.00 | 0.03 | 99.86   | 28.29   | 3.53 | 1385582_at   | Osbp12     | oxysterol binding protein-like 2                                           |
| 0.00 | 0.01 | 115.56  | 32.94   | 3.51 | 1380728_at   | NA         | NA                                                                         |
| 0.00 | 0.02 | 95.21   | 27.28   | 3.49 | 1382622_at   | Cst7       | cystatin F (leukocystatin)                                                 |
| 0.00 | 0.02 | 322.06  | 92.43   | 3.48 | 1379677_at   | Tnfsf13    | tumor necrosis factor (ligand) superfamily, member 13                      |
| 0.00 | 0.01 | 698.90  | 202.07  | 3.46 | 1398511_at   | Susd2      | sushi domain containing 2                                                  |
| 0.00 | 0.01 | 95.91   | 27.75   | 3.46 | 1397167_at   | NA         | NA                                                                         |
| 0.00 | 0.02 | 3116.25 | 902.43  | 3.45 | 1370883_at   | H2-Ea      | histocompatibility 2, class II antigen E alpha                             |
| 0.00 | 0.01 | 184.03  | 53.82   | 3.42 | 1390798_at   | Ptpcr      | protein tyrosine phosphatase, receptor type, C                             |
| 0.00 | 0.01 | 33.21   | 9.76    | 3.40 | 1369105_a_at | Pkib       | protein kinase inhibitor beta, (cAMP-dependent, catalytic) inhibitor beta  |
| 0.00 | 0.04 | 339.68  | 99.96   | 3.40 | 1387769_a_at | Id3        | inhibitor of DNA binding 3                                                 |
| 0.00 | 0.02 | 97.34   | 28.72   | 3.39 | 1393901_at   | Runx1t1    | runt-related transcription factor 1; translocated to, 1 (cyclin D-related) |
| 0.00 | 0.01 | 131.70  | 39.50   | 3.33 | 1375716_at   | Ifngr2     | interferon gamma receptor 2                                                |
| 0.00 | 0.01 | 156.45  | 47.68   | 3.28 | 1370585_a_at | Prkcb      | protein kinase C, beta                                                     |
| 0.00 | 0.01 | 110.39  | 34.05   | 3.24 | 1380077_at   | NA         | NA                                                                         |
| 0.00 | 0.03 | 176.70  | 54.61   | 3.24 | 1380373_at   | Gmps       | guanine monphosphate synthetase                                            |
| 0.00 | 0.03 | 87.99   | 27.40   | 3.21 | 1381875_at   | Nmi        | N-myc (and STAT) interactor                                                |
| 0.00 | 0.01 | 57.88   | 18.04   | 3.21 | 1368338_at   | Cd52       | CD52 antigen                                                               |
| 0.00 | 0.01 | 106.89  | 33.52   | 3.19 | 1379766_at   | Sla        | src-like adaptor                                                           |
| 0.00 | 0.03 | 2747.34 | 870.57  | 3.16 | 1388552_at   | Smpd1      | sphingomyelin phosphodiesterase 1, acid lysosomal                          |
| 0.00 | 0.02 | 83.56   | 26.68   | 3.13 | 1387328_at   | Cyp2c      | cytochrome P450, subfamily IIC (mephenytoin 4-hydroxylase)                 |
| 0.00 | 0.04 | 3655.05 | 1178.25 | 3.10 | 1367784_a_at | Clu        | clusterin                                                                  |
| 0.00 | 0.02 | 67.84   | 21.91   | 3.10 | 1384837_at   | Cd69       | Cd69 molecule                                                              |
| 0.00 | 0.02 | 1508.16 | 487.34  | 3.09 | 1390738_at   | Bst2       | bone marrow stromal cell antigen 2                                         |
| 0.00 | 0.01 | 24.57   | 8.08    | 3.04 | 1386695_at   | NA         | NA                                                                         |
| 0.00 | 0.04 | 138.91  | 46.19   | 3.01 | 1375627_at   | Akirin2    | akirin 2                                                                   |
| 0.00 | 0.01 | 131.73  | 44.02   | 2.99 | 1389092_at   | Il2rg      | interleukin 2 receptor, gamma                                              |
| 0.00 | 0.01 | 55.33   | 18.60   | 2.97 | 1370603_a_at | Ptpcr      | protein tyrosine phosphatase, receptor type, C                             |
| 0.00 | 0.04 | 279.60  | 94.01   | 2.97 | 1389166_at   | Cib2       | calcium and integrin binding family member 2                               |
| 0.00 | 0.01 | 151.92  | 51.16   | 2.97 | 1368826_at   | Comt       | catechol-O-methyltransferase                                               |
| 0.00 | 0.03 | 118.58  | 40.05   | 2.96 | 1388246_at   | Clu        | clusterin                                                                  |
| 0.00 | 0.01 | 84.49   | 28.59   | 2.96 | 1389413_at   | Evi2a      | ecotropic viral integration site 2A                                        |
| 0.00 | 0.03 | 139.35  | 47.38   | 2.94 | 1371090_at   | Scamp2     | secretory carrier membrane protein 2                                       |
| 0.00 | 0.03 | 139.96  | 48.18   | 2.90 | 1390942_at   | Peli2      | pellino 2                                                                  |
| 0.00 | 0.04 | 108.81  | 37.47   | 2.90 | 1369597_at   | Vapb       | VAMP (vesicle-associated membrane protein)-associated protein B and C      |

|      |      |         |        |      |              |            |                                                                                         |
|------|------|---------|--------|------|--------------|------------|-----------------------------------------------------------------------------------------|
| 0.00 | 0.02 | 64.50   | 22.25  | 2.90 | 1374236_at   | Lgi2       | leucine-rich repeat LGI family, member 2                                                |
| 0.00 | 0.01 | 86.82   | 30.43  | 2.85 | 1390797_at   | Lcp2       | lymphocyte cytosolic protein 2                                                          |
| 0.00 | 0.01 | 39.76   | 14.02  | 2.84 | 1398644_at   | Plxnc1     | plexin C1                                                                               |
| 0.00 | 0.01 | 215.91  | 76.35  | 2.83 | 1381817_at   | NA         | NA                                                                                      |
| 0.00 | 0.01 | 110.43  | 39.40  | 2.80 | 1379791_at   | Cd3e       | CD3 molecule, epsilon polypeptide                                                       |
| 0.00 | 0.04 | 121.76  | 43.77  | 2.78 | 1398256_at   | Il1b       | interleukin 1 beta                                                                      |
| 0.00 | 0.01 | 65.14   | 23.42  | 2.78 | 1376943_at   | NA         | NA                                                                                      |
| 0.00 | 0.01 | 117.03  | 42.08  | 2.78 | 1369190_at   | Cd2        | Cd2 molecule                                                                            |
| 0.00 | 0.01 | 149.55  | 54.39  | 2.75 | 1369029_at   | Plscr1     | phospholipid scramblase 1                                                               |
| 0.00 | 0.02 | 63.40   | 23.08  | 2.75 | 1369568_at   | Stx6       | syntaxin 6                                                                              |
| 0.00 | 0.01 | 15.99   | 5.88   | 2.72 | 1393791_at   | Trat1      | T cell receptor associated transmembrane adaptor 1                                      |
| 0.00 | 0.03 | 82.41   | 30.59  | 2.69 | 1389961_at   | Sdccag3    | serologically defined colon cancer antigen 3                                            |
| 0.00 | 0.04 | 269.49  | 100.24 | 2.69 | 1392621_at   | Tcf25      | transcription factor 25 (basic helix-loop-helix)                                        |
| 0.00 | 0.01 | 84.95   | 31.63  | 2.69 | 1368783_at   | Icos       | inducible T-cell co-stimulator                                                          |
| 0.00 | 0.03 | 341.90  | 127.85 | 2.67 | 1377905_at   | Lsm14a     | LSM14A, SCD6 homolog A (S. cerevisiae)                                                  |
| 0.00 | 0.02 | 62.62   | 23.51  | 2.66 | 1386410_at   | NA         | NA                                                                                      |
| 0.00 | 0.04 | 101.20  | 38.14  | 2.65 | 1374542_at   | NA         | NA                                                                                      |
| 0.00 | 0.03 | 39.78   | 15.05  | 2.64 | 1393649_at   | NA         | NA                                                                                      |
| 0.00 | 0.03 | 31.32   | 11.86  | 2.64 | 1385302_at   | Gdpd1      | glycerophosphodiester phosphodiesterase domain containing 1                             |
| 0.00 | 0.02 | 1046.98 | 397.70 | 2.63 | 1399080_at   | LOC688495  | hypothetical protein LOC688495                                                          |
| 0.00 | 0.03 | 78.30   | 29.86  | 2.62 | 1392259_at   | Hectd1     | HECT domain containing 1                                                                |
| 0.00 | 0.03 | 359.31  | 138.02 | 2.60 | 1382274_at   | Rarres1    | retinoic acid receptor responder (tazarotene induced) 1                                 |
| 0.00 | 0.03 | 401.18  | 154.92 | 2.59 | 1367652_at   | Igfbp3     | insulin-like growth factor binding protein 3                                            |
| 0.00 | 0.04 | 164.26  | 63.44  | 2.59 | 1394709_at   | NA         | NA                                                                                      |
| 0.00 | 0.01 | 68.32   | 26.53  | 2.58 | 1392794_at   | NA         | NA                                                                                      |
| 0.00 | 0.02 | 41.43   | 16.15  | 2.57 | 1394891_at   | RGD1564541 | similar to hypothetical protein FLJ22965                                                |
| 0.00 | 0.02 | 340.08  | 132.57 | 2.57 | 1372404_at   | Rac2       | ras-related C3 botulinum toxin substrate 2 (rho family, small GTP binding protein Rac2) |
| 0.00 | 0.01 | 194.34  | 76.05  | 2.56 | 1383320_at   | Lck        | lymphocyte-specific protein tyrosine kinase                                             |
| 0.00 | 0.03 | 43.94   | 17.23  | 2.55 | 1378418_at   | Tifab      | TRAF-interacting protein with forkhead-associated domain, family member B               |
| 0.00 | 0.02 | 162.38  | 63.85  | 2.54 | 1368983_at   | Hbegf      | heparin-binding EGF-like growth factor                                                  |
| 0.00 | 0.03 | 174.67  | 68.91  | 2.53 | 1393329_at   | NA         | NA                                                                                      |
| 0.00 | 0.01 | 683.69  | 272.09 | 2.51 | 1389210_at   | Lcp1       | lymphocyte cytosolic protein 1                                                          |
| 0.00 | 0.02 | 135.08  | 53.85  | 2.51 | 1393347_at   | Itgal      | integrin alpha L                                                                        |
| 0.00 | 0.01 | 441.59  | 177.30 | 2.49 | 1370882_at   | Hla-dmb    | major histocompatibility complex, class II, DM beta                                     |
| 0.00 | 0.01 | 57.12   | 23.00  | 2.48 | 1395602_at   | NA         | NA                                                                                      |
| 0.00 | 0.01 | 995.04  | 401.41 | 2.48 | 1370383_s_at | RT1-Db1    | RT1 class II, locus Db1                                                                 |
| 0.00 | 0.03 | 197.64  | 80.04  | 2.47 | 1378700_at   | NA         | NA                                                                                      |
| 0.00 | 0.01 | 286.04  | 116.61 | 2.45 | 1370056_at   | Ly6c       | Ly6-C antigen                                                                           |
| 0.00 | 0.03 | 117.31  | 48.08  | 2.44 | 1368776_at   | Alox5      | arachidonate 5-lipoxygenase                                                             |
| 0.00 | 0.03 | 314.98  | 129.23 | 2.44 | 1368006_at   | Laptm5     | lysosomal multispinning membrane protein 5                                              |
| 0.00 | 0.01 | 24.71   | 10.16  | 2.43 | 1387459_at   | Pkib       | protein kinase inhibitor beta, (cAMP-dependent, catalytic) inhibitor beta               |



|      |      |         |         |      |              |            |                                                                                                |
|------|------|---------|---------|------|--------------|------------|------------------------------------------------------------------------------------------------|
| 0.00 | 0.02 | 45.57   | 18.83   | 2.42 | 1390077_at   | Tram1      | translocation associated membrane protein 1                                                    |
| 0.00 | 0.01 | 62.94   | 26.03   | 2.42 | 1382566_at   | Il7r       | interleukin 7 receptor                                                                         |
| 0.00 | 0.01 | 113.55  | 46.99   | 2.42 | 1376624_at   | NA         | NA                                                                                             |
| 0.00 | 0.01 | 294.91  | 122.54  | 2.41 | 1370904_at   | Hla-dma    | major histocompatibility complex, class II, DM alpha                                           |
| 0.00 | 0.03 | 178.46  | 74.50   | 2.40 | 1388773_at   | Tnfaip2    | tumor necrosis factor, alpha-induced protein 2                                                 |
| 0.00 | 0.01 | 793.30  | 331.40  | 2.39 | 1386860_at   | Mfge8      | milk fat globule-EGF factor 8 protein                                                          |
| 0.00 | 0.04 | 129.92  | 54.39   | 2.39 | 1395589_at   | Slc35a3    | solute carrier family 35 (UDP-N-acetylglucosamine (UDP-GlcNAc) transporter), member A3         |
| 0.00 | 0.02 | 47.28   | 19.82   | 2.38 | 1379492_at   | NA         | NA                                                                                             |
| 0.00 | 0.01 | 27.22   | 11.43   | 2.38 | 1378043_at   | RGD1563091 | similar to OEF2                                                                                |
| 0.00 | 0.04 | 5498.61 | 2314.57 | 2.38 | 1387108_at   | Csnk2b     | casein kinase 2, beta subunit                                                                  |
| 0.00 | 0.03 | 652.71  | 276.18  | 2.36 | 1374388_at   | Efh2       | EF-hand domain family, member D2                                                               |
| 0.00 | 0.04 | 850.74  | 360.29  | 2.36 | 1375259_at   | Eif4ebp2   | eukaryotic translation initiation factor 4E binding protein 2                                  |
| 0.00 | 0.04 | 123.51  | 52.37   | 2.36 | 1375130_at   | LOC679612  | hypothetical protein LOC679612                                                                 |
| 0.00 | 0.01 | 274.42  | 116.66  | 2.35 | 1377671_at   | NA         | NA                                                                                             |
| 0.00 | 0.01 | 83.45   | 35.53   | 2.35 | 1385885_at   | NA         | NA                                                                                             |
| 0.00 | 0.03 | 99.96   | 42.58   | 2.35 | 1377286_at   | Gimap4     | GTPase, IMAP family member 4                                                                   |
| 0.00 | 0.02 | 36.22   | 15.43   | 2.35 | 1388036_a_at | Milt4      | myeloid/lymphoid or mixed-lineage leukemia (trithorax homolog, Drosophila); translocated to, 4 |
| 0.00 | 0.01 | 141.86  | 60.61   | 2.34 | 1382026_at   | Arhgap9    | Rho GTPase activating protein 9                                                                |
| 0.00 | 0.02 | 208.80  | 89.23   | 2.34 | 1394292_at   | Mrpl37     | mitochondrial ribosomal protein L37                                                            |
| 0.00 | 0.04 | 85.82   | 36.71   | 2.34 | 1369093_at   | Reln       | reelin                                                                                         |
| 0.00 | 0.03 | 17.37   | 7.44    | 2.33 | 1394051_at   | P2ry10     | purinergic receptor P2Y, G-protein coupled 10                                                  |
| 0.00 | 0.03 | 49.07   | 21.05   | 2.33 | 1370766_at   | Snap29     | synaptosomal-associated protein 29                                                             |
| 0.00 | 0.04 | 74.41   | 31.95   | 2.33 | 1380529_at   | NA         | NA                                                                                             |
| 0.00 | 0.01 | 246.39  | 106.38  | 2.32 | 1375254_at   | Slc35a1    | solute carrier family 35 (CMP-sialic acid transporter), member A1                              |
| 0.00 | 0.04 | 84.61   | 36.70   | 2.31 | 1383577_at   | NA         | NA                                                                                             |
| 0.00 | 0.03 | 48.85   | 21.19   | 2.31 | 1398540_at   | Rgs1       | regulator of G-protein signaling 1                                                             |
| 0.00 | 0.01 | 111.64  | 48.43   | 2.31 | 1368723_at   | Lat        | linker for activation of T cells                                                               |
| 0.00 | 0.03 | 194.27  | 84.29   | 2.30 | 1370529_a_at | Pld1       | phospholipase D1                                                                               |
| 0.00 | 0.02 | 51.70   | 22.45   | 2.30 | 1369331_a_at | Unc13b     | unc-13 homolog B (C. elegans)                                                                  |
| 0.00 | 0.04 | 579.07  | 251.82  | 2.30 | 1387074_at   | Rgs2       | regulator of G-protein signaling 2                                                             |
| 0.00 | 0.02 | 195.62  | 85.70   | 2.28 | 1394960_at   | Sdr42e1    | short chain dehydrogenase/reductase family 42E, member 1                                       |
| 0.00 | 0.04 | 436.70  | 191.54  | 2.28 | 1368655_at   | Srgn       | serglycin                                                                                      |
| 0.00 | 0.04 | 39.66   | 17.42   | 2.28 | 1387687_at   | Igsf6      | immunoglobulin superfamily, member 6                                                           |
| 0.00 | 0.01 | 150.91  | 66.37   | 2.27 | 1370924_at   | Tcrb       | T-cell receptor beta chain                                                                     |
| 0.00 | 0.01 | 3372.38 | 1486.58 | 2.27 | 1367679_at   | Cd74       | Cd74 molecule, major histocompatibility complex, class II invariant chain                      |
| 0.00 | 0.01 | 31.73   | 13.99   | 2.27 | 1389859_at   | Csnk1a1    | casein kinase 1, alpha 1                                                                       |
| 0.00 | 0.02 | 96.16   | 42.64   | 2.26 | 1370090_at   | Lcp2       | lymphocyte cytosolic protein 2                                                                 |
| 0.00 | 0.01 | 63.58   | 28.23   | 2.25 | 1378314_at   | NA         | NA                                                                                             |
| 0.00 | 0.02 | 69.61   | 30.97   | 2.25 | 1368270_at   | Apobec1    | apolipoprotein B mRNA editing enzyme, catalytic polypeptide 1                                  |
| 0.00 | 0.03 | 49.49   | 22.05   | 2.24 | 1381771_at   | NA         | NA                                                                                             |
| 0.00 | 0.03 | 50.87   | 22.71   | 2.24 | 1378915_x_at | LOC308990  | hypothetical protein LOC308990                                                                 |
| 0.00 | 0.02 | 195.35  | 87.26   | 2.24 | 1376989_at   | NA         | NA                                                                                             |

|      |      |         |         |      |              |            |                                                                                                                 |
|------|------|---------|---------|------|--------------|------------|-----------------------------------------------------------------------------------------------------------------|
| 0.00 | 0.03 | 164.32  | 73.58   | 2.23 | 1379568_at   | Ifit2      | interferon-induced protein with tetratricopeptide repeats 2                                                     |
| 0.00 | 0.01 | 116.48  | 52.20   | 2.23 | 1378633_at   | Lpxn       | leupaxin                                                                                                        |
| 0.00 | 0.02 | 140.05  | 62.89   | 2.23 | 1368422_at   | Meox2      | mesenchyme homeobox 2                                                                                           |
| 0.00 | 0.04 | 31.21   | 14.02   | 2.23 | 1395758_at   | Syncrip    | synaptotagmin binding, cytoplasmic RNA interacting protein                                                      |
| 0.00 | 0.04 | 283.27  | 127.28  | 2.23 | 1374626_at   | Lrg1       | leucine-rich alpha-2-glycoprotein 1                                                                             |
| 0.00 | 0.04 | 333.73  | 149.96  | 2.23 | 1370219_at   | Cyba       | cytochrome b-245, alpha polypeptide                                                                             |
| 0.00 | 0.02 | 19.81   | 8.91    | 2.22 | 1393589_at   | Klhl4      | kelch-like 4 (Drosophila)                                                                                       |
| 0.00 | 0.03 | 256.92  | 116.21  | 2.21 | 1379598_at   | NA         | NA                                                                                                              |
| 0.00 | 0.04 | 4003.92 | 1812.93 | 2.21 | 1370952_at   | Gstm2      | glutathione S-transferase mu 2                                                                                  |
| 0.00 | 0.03 | 20.45   | 9.27    | 2.21 | 1375764_at   | Chmp2b     | chromatin modifying protein 2B                                                                                  |
| 0.00 | 0.03 | 23.65   | 10.81   | 2.19 | 1379554_at   | Ppp2r5e    | protein phosphatase 2, regulatory subunit B@#%&, epsilon isoform                                                |
| 0.00 | 0.01 | 145.83  | 66.77   | 2.18 | 1397717_at   | Isoc2b     | isochorismatase domain containing 2b                                                                            |
| 0.00 | 0.02 | 34.64   | 15.92   | 2.18 | 1380432_at   | Cmah       | cytidine monophosphate-N-acetylneuraminic acid hydroxylase (CMP-N-acetylneuraminic acid hydroxylase) pseudogene |
| 0.00 | 0.01 | 93.18   | 42.87   | 2.17 | 1387472_at   | Cd3d       | CD3 molecule delta polypeptide                                                                                  |
| 0.00 | 0.01 | 116.91  | 53.98   | 2.17 | 1372852_at   | Ptpncap    | protein tyrosine phosphatase, receptor type, C-associated protein                                               |
| 0.00 | 0.03 | 529.12  | 245.31  | 2.16 | 1369559_a_at | Cd47       | Cd47 molecule                                                                                                   |
| 0.00 | 0.02 | 207.24  | 96.12   | 2.16 | 1370186_at   | Psmb9      | proteasome (prosome, macropain) subunit, beta type 9 (large multifunctional peptidase 2)                        |
| 0.00 | 0.02 | 202.87  | 94.12   | 2.16 | 1378376_at   | Chic2      | cysteine-rich hydrophobic domain 2                                                                              |
| 0.00 | 0.01 | 1015.25 | 472.15  | 2.15 | 1383658_at   | Laptm5     | lysosomal multispansing membrane protein 5                                                                      |
| 0.00 | 0.01 | 149.06  | 69.59   | 2.14 | 1386681_at   | LOC497934  | similar to hypothetical protein FLJ20014                                                                        |
| 0.00 | 0.04 | 160.69  | 75.03   | 2.14 | 1388125_a_at | Klc1       | kinesin light chain 1                                                                                           |
| 0.00 | 0.03 | 194.22  | 90.89   | 2.14 | 1380617_at   | Gimap5     | GTPase, IMAP family member 5                                                                                    |
| 0.00 | 0.02 | 62.64   | 29.33   | 2.14 | 1384483_at   | NA         | NA                                                                                                              |
| 0.00 | 0.02 | 65.38   | 30.73   | 2.13 | 1397604_at   | LOC681825  | similar to Prefoldin subunit 3 (Von Hippel-Lindau-binding protein 1) (VHL-binding protein 1) (VBP-1)            |
| 0.00 | 0.03 | 19.00   | 9.00    | 2.11 | 1395721_at   | Papss2     | 3@#%&-phosphoadenosine 5@#%&-phosphosulfate synthase 2                                                          |
| 0.00 | 0.03 | 440.84  | 209.40  | 2.11 | 1394565_at   | Copz1      | coatamer protein complex, subunit zeta 1                                                                        |
| 0.00 | 0.01 | 1392.25 | 662.66  | 2.10 | 1386996_at   | Mrlc2      | myosin regulatory light chain MRLC2                                                                             |
| 0.00 | 0.01 | 1027.38 | 489.34  | 2.10 | 1373397_at   | Mapre1     | microtubule-associated protein, RP/EB family, member 1                                                          |
| 0.00 | 0.01 | 63.22   | 30.23   | 2.09 | 1369721_at   | Strn       | striatin, calmodulin binding protein                                                                            |
| 0.00 | 0.02 | 217.96  | 104.59  | 2.08 | 1373963_at   | Hdhd3      | haloacid dehalogenase-like hydrolase domain containing 3                                                        |
| 0.00 | 0.01 | 95.94   | 46.13   | 2.08 | 1397866_at   | Serpnb6b   | serine (or cysteine) peptidase inhibitor, clade B, member 6b                                                    |
| 0.00 | 0.03 | 336.83  | 162.00  | 2.08 | 1379516_at   | RGD1559896 | similar to RIKEN cDNA 2310022B05                                                                                |
| 0.00 | 0.03 | 198.39  | 95.48   | 2.08 | 1379295_at   | Gngt2      | guanine nucleotide binding protein (G protein), gamma transducing activity polypeptide 2                        |
| 0.00 | 0.03 | 1019.36 | 493.36  | 2.07 | 1371833_at   | Bri3       | brain protein I3                                                                                                |
| 0.00 | 0.02 | 50.59   | 24.54   | 2.06 | 1395640_at   | Cdc23      | CDC23 (cell division cycle 23, yeast, homolog)                                                                  |
| 0.00 | 0.02 | 2984.20 | 1449.73 | 2.06 | 1388365_at   | Atp6v0d1   | ATPase, H+ transporting, lysosomal 38kDa, V0 subunit d1                                                         |

|      |      |         |         |      |              |            |                                                                                 |
|------|------|---------|---------|------|--------------|------------|---------------------------------------------------------------------------------|
| 0.00 | 0.04 | 74.61   | 36.28   | 2.06 | 1370571_at   | Slco3a1    | solute carrier organic anion transporter family, member 3a1                     |
| 0.00 | 0.04 | 337.24  | 164.15  | 2.05 | 1378137_at   | Lrrc59     | leucine rich repeat containing 59                                               |
| 0.00 | 0.02 | 6762.98 | 3315.00 | 2.04 | 1371542_at   | Tuba4a     | tubulin, alpha 4A                                                               |
| 0.00 | 0.03 | 94.28   | 46.31   | 2.04 | 1385143_at   | RGD1561963 | similar to Dedicator of cytokinesis protein 10 (Protein zizimin 3)              |
| 0.00 | 0.03 | 214.98  | 105.85  | 2.03 | 1390152_at   | Tmed7      | transmembrane emp24 protein transport domain containing 7                       |
| 0.00 | 0.02 | 2310.46 | 1139.26 | 2.03 | 1372513_at   | Rac1       | ras-related C3 botulinum toxin substrate 1                                      |
| 0.00 | 0.01 | 70.62   | 34.86   | 2.03 | 1394488_at   | NA         | NA                                                                              |
| 0.00 | 0.03 | 26.76   | 13.22   | 2.02 | 1375717_at   | Aes        | amino-terminal enhancer of split                                                |
| 0.00 | 0.04 | 594.44  | 293.95  | 2.02 | 1367773_at   | Slc25a1    | solute carrier family 25 (mitochondrial carrier, citrate transporter), member 1 |
| 0.00 | 0.02 | 137.05  | 67.77   | 2.02 | 1369209_at   | P34        | p34 protein                                                                     |
| 0.00 | 0.04 | 25.47   | 12.60   | 2.02 | 1370769_a_at | Icos       | inducible T-cell co-stimulator                                                  |
| 0.00 | 0.02 | 270.05  | 134.03  | 2.01 | 1373065_at   | Ptpn18     | protein tyrosine phosphatase, non-receptor type 18                              |
| 0.00 | 0.03 | 398.77  | 198.11  | 2.01 | 1376788_at   | Dapk1      | death associated protein kinase 1                                               |
| 0.00 | 0.03 | 247.56  | 123.05  | 2.01 | 1371959_at   | Hist2h2aa3 | histone cluster 2, H2aa3                                                        |
| 0.00 | 0.01 | 137.58  | 68.54   | 2.01 | 1395251_at   | NA         | NA                                                                              |
| 0.00 | 0.01 | 279.39  | 139.46  | 2.00 | 1393883_at   | NA         | NA                                                                              |
| 0.00 | 0.04 | 1541.72 | 770.12  | 2.00 | 1378059_at   | NA         | NA                                                                              |
| 0.00 | 0.01 | 54.21   | 27.11   | 2.00 | 1382167_at   | Sit1       | signaling threshold regulating transmembrane adaptor 1                          |
| 0.00 | 0.03 | 1487.47 | 746.86  | 1.99 | 1387279_at   | F11r       | F11 receptor                                                                    |
| 0.00 | 0.02 | 29.29   | 14.71   | 1.99 | 1375528_at   | Pnpla8     | patatin-like phospholipase domain containing 8                                  |
| 0.00 | 0.04 | 53.09   | 26.66   | 1.99 | 1379192_at   | Asf1a      | ASF1 anti-silencing function 1 homolog A (S. cerevisiae)                        |
| 0.00 | 0.01 | 361.28  | 183.11  | 1.97 | 1394842_at   | Tmem19     | transmembrane protein 19                                                        |
| 0.00 | 0.02 | 24.89   | 12.63   | 1.97 | 1394833_at   | NA         | NA                                                                              |
| 0.00 | 0.03 | 96.35   | 48.98   | 1.97 | 1392019_at   | Asap1      | ArfGAP with SH3 domain, ankyrin repeat and PH domain 1                          |
| 0.00 | 0.02 | 104.19  | 53.11   | 1.96 | 1390914_at   | Fli1       | Friend leukemia virus integration 1                                             |
| 0.00 | 0.03 | 238.46  | 121.67  | 1.96 | 1370614_s_at | Stk39      | serine/threonine kinase 39, STE20/SPS1 homolog (yeast)                          |
| 0.00 | 0.01 | 343.31  | 175.66  | 1.95 | 1375216_at   | Pvr2       | poliovirus receptor-related 2                                                   |
| 0.00 | 0.04 | 98.80   | 50.66   | 1.95 | 1382813_at   | RGD1310810 | similar to RIKEN cDNA 4930444A02                                                |
| 0.00 | 0.04 | 675.65  | 346.55  | 1.95 | 1370968_at   | Nfkb1      | nuclear factor of kappa light polypeptide gene enhancer in B-cells 1            |
| 0.00 | 0.04 | 207.07  | 106.42  | 1.95 | 1370251_at   | Avpi1      | arginine vasopressin-induced 1                                                  |
| 0.00 | 0.04 | 202.55  | 104.28  | 1.94 | 1368645_at   | Ptpn1      | protein tyrosine phosphatase, non-receptor type 1                               |
| 0.00 | 0.03 | 113.95  | 58.68   | 1.94 | 1389876_at   | Camk2n1    | calcium/calmodulin-dependent protein kinase II inhibitor 1                      |
| 0.00 | 0.01 | 277.93  | 143.39  | 1.94 | 1393250_at   | NA         | NA                                                                              |
| 0.00 | 0.02 | 4950.84 | 2555.19 | 1.94 | 1371644_at   | Twf1       | twinfilin, actin-binding protein, homolog 1 (Drosophila)                        |
| 0.00 | 0.01 | 19.90   | 10.27   | 1.94 | 1368240_a_at | Prkcb      | protein kinase C, beta                                                          |
| 0.00 | 0.02 | 22.45   | 11.59   | 1.94 | 1384104_at   | NA         | NA                                                                              |
| 0.00 | 0.01 | 280.38  | 144.84  | 1.94 | 1392716_at   | NA         | NA                                                                              |
| 0.00 | 0.02 | 31.72   | 16.39   | 1.94 | 1383096_at   | Aplp2      | amyloid beta (A4) precursor-like protein 2                                      |
| 0.00 | 0.04 | 45.30   | 23.46   | 1.93 | 1389922_at   | Hadh       | hydroxyacyl-Coenzyme A dehydrogenase                                            |
| 0.00 | 0.03 | 79.44   | 41.21   | 1.93 | 1376977_at   | Ptger3     | prostaglandin E receptor 3 (subtype EP3)                                        |

|      |      |         |         |      |              |            |                                                                                                                  |
|------|------|---------|---------|------|--------------|------------|------------------------------------------------------------------------------------------------------------------|
| 0.00 | 0.01 | 97.67   | 50.68   | 1.93 | 1380537_at   | Nckap1l    | NCK associated protein 1 like                                                                                    |
| 0.00 | 0.02 | 72.43   | 37.67   | 1.92 | 1378914_a_at | LOC308990  | hypothetical protein LOC308990                                                                                   |
| 0.00 | 0.03 | 108.46  | 56.45   | 1.92 | 1370539_at   | Rab8b      | RAB8B, member RAS oncogene family                                                                                |
| 0.00 | 0.01 | 109.93  | 57.27   | 1.92 | 1372200_at   | Gpsm3      | G-protein signaling modulator 3 (AGS3-like, <i>C. elegans</i> )                                                  |
| 0.00 | 0.03 | 467.06  | 244.14  | 1.91 | 1386954_at   | Ak2        | adenylate kinase 2                                                                                               |
| 0.00 | 0.02 | 946.64  | 495.69  | 1.91 | 1399090_at   | Dync1li1   | dynein cytoplasmic 1 light intermediate chain 1                                                                  |
| 0.00 | 0.02 | 1562.39 | 822.89  | 1.90 | 1376248_at   | Sult2b1    | sulfotransferase family, cytosolic, 2B, member 1                                                                 |
| 0.00 | 0.01 | 40.02   | 21.08   | 1.90 | 1397201_at   | RGD1310950 | similar to KIAA1078 protein                                                                                      |
| 0.00 | 0.03 | 406.37  | 214.26  | 1.90 | 1377673_at   | NA         | NA                                                                                                               |
| 0.00 | 0.03 | 216.79  | 114.50  | 1.89 | 1368073_at   | Irf1       | interferon regulatory factor 1                                                                                   |
| 0.00 | 0.03 | 1650.26 | 873.64  | 1.89 | 1388120_at   | Pdcd6ip    | programmed cell death 6 interacting protein                                                                      |
| 0.00 | 0.02 | 30.31   | 16.09   | 1.88 | 1392068_at   | NA         | NA                                                                                                               |
| 0.00 | 0.02 | 31.29   | 16.64   | 1.88 | 1398530_at   | Gng11      | guanine nucleotide binding protein (G protein), gamma 11                                                         |
| 0.00 | 0.01 | 68.62   | 36.51   | 1.88 | 1392082_a_at | Cd7        | Cd7 molecule                                                                                                     |
| 0.00 | 0.03 | 646.66  | 344.32  | 1.88 | 1391495_at   | RGD1311783 | similar to RIKEN cDNA 2010012O05                                                                                 |
| 0.00 | 0.02 | 99.61   | 53.09   | 1.88 | 1382692_at   | Clec7a     | C-type lectin domain family 7, member a                                                                          |
| 0.00 | 0.02 | 825.94  | 440.96  | 1.87 | 1368118_at   | Bcl10      | B-cell CLL/lymphoma 10                                                                                           |
| 0.00 | 0.01 | 85.04   | 45.42   | 1.87 | 1387270_at   | Hhex       | hematopoietically expressed homeobox                                                                             |
| 0.00 | 0.04 | 806.70  | 431.47  | 1.87 | 1371359_at   | Mlf2       | myeloid leukemia factor 2                                                                                        |
| 0.00 | 0.02 | 45.25   | 24.22   | 1.87 | 1397304_at   | Igtp       | interferon gamma induced GTPase                                                                                  |
| 0.00 | 0.01 | 46.28   | 24.77   | 1.87 | 1383638_at   | NA         | NA                                                                                                               |
| 0.00 | 0.02 | 19.77   | 10.58   | 1.87 | 1396255_at   | Kif16b     | kinesin family member 16B                                                                                        |
| 0.00 | 0.02 | 96.99   | 51.94   | 1.87 | 1369562_at   | Hpcal1     | hippocalcin-like 1                                                                                               |
| 0.00 | 0.04 | 1608.63 | 861.91  | 1.87 | 1375637_at   | RGD1311122 | similar to RIKEN cDNA 1110003E01                                                                                 |
| 0.00 | 0.04 | 304.72  | 163.48  | 1.86 | 1381119_at   | Ttc1       | tetratricopeptide repeat domain 1                                                                                |
| 0.00 | 0.04 | 114.00  | 61.30   | 1.86 | 1373863_at   | Map4k4     | mitogen-activated protein kinase kinase kinase 4                                                                 |
| 0.00 | 0.01 | 88.83   | 47.80   | 1.86 | 1368926_at   | Sema4f     | sema domain, immunoglobulin domain (Ig), transmembrane domain (TM) and short cytoplasmic domain, (semaphorin) 4F |
| 0.00 | 0.03 | 66.04   | 35.65   | 1.85 | 1372326_at   | Slc2a3     | solute carrier family 2 (facilitated glucose transporter), member 3                                              |
| 0.00 | 0.02 | 324.61  | 175.98  | 1.84 | 1372179_at   | Hpcal1     | hippocalcin-like 1                                                                                               |
| 0.00 | 0.03 | 21.84   | 11.87   | 1.84 | 1393926_at   | Stap1      | signal transducing adaptor family member 1                                                                       |
| 0.00 | 0.04 | 1877.28 | 1020.36 | 1.84 | 1369956_at   | Ifngr1     | interferon gamma receptor 1                                                                                      |
| 0.00 | 0.03 | 21.94   | 11.93   | 1.84 | 1388202_at   | RT1-Aw2    | RT1 class Ib, locus Aw2                                                                                          |
| 0.00 | 0.04 | 52.57   | 28.62   | 1.84 | 1369518_at   | Pik3r3     | phosphoinositide-3-kinase, regulatory subunit 3 (gamma)                                                          |
| 0.00 | 0.02 | 32.22   | 17.55   | 1.84 | 1397813_at   | NA         | NA                                                                                                               |
| 0.00 | 0.02 | 106.19  | 57.93   | 1.83 | 1393049_at   | Myo1g      | myosin IG                                                                                                        |
| 0.00 | 0.03 | 54.06   | 29.56   | 1.83 | 1368735_a_at | Trpv2      | transient receptor potential cation channel, subfamily V, member 2                                               |
| 0.00 | 0.03 | 227.69  | 124.56  | 1.83 | 1391489_at   | Irgm       | immunity-related GTPase family, M                                                                                |
| 0.00 | 0.03 | 5375.57 | 2944.54 | 1.83 | 1387043_at   | Lypd3      | Ly6/Plaur domain containing 3                                                                                    |
| 0.00 | 0.02 | 1457.92 | 799.52  | 1.82 | 1372247_at   | Ddost      | dolichyl-diphosphooligosaccharide-protein glycosyltransferase                                                    |
| 0.00 | 0.04 | 299.46  | 164.29  | 1.82 | 1393015_at   | RGD1310587 | similar to hypothetical protein FLJ14146                                                                         |
| 0.00 | 0.04 | 59.63   | 32.80   | 1.82 | 1370561_at   | A3galt2    | alpha 1,3-galactosyltransferase 2                                                                                |

|      |      |         |         |      |              |            |                                                                         |
|------|------|---------|---------|------|--------------|------------|-------------------------------------------------------------------------|
| 0.00 | 0.04 | 706.34  | 389.65  | 1.81 | 1376172_at   | Abcg4      | ATP-binding cassette, sub-family G (WHITE), member 4                    |
| 0.00 | 0.02 | 474.03  | 262.65  | 1.80 | 1370199_at   | Nucb1      | nucleobindin 1                                                          |
| 0.00 | 0.02 | 71.58   | 39.81   | 1.80 | 1373838_at   | Fut4       | fucosyltransferase 4 (alpha (1,3) fucosyltransferase, myeloid-specific) |
| 0.00 | 0.03 | 67.19   | 37.41   | 1.80 | 1376710_at   | NA         | NA                                                                      |
| 0.00 | 0.02 | 180.44  | 100.47  | 1.80 | 1383289_at   | Nif31      | NIF3 NGG1 interacting factor 3-like 1 (S. pombe)                        |
| 0.00 | 0.02 | 915.48  | 510.72  | 1.79 | 1388386_at   | Chmp1a     | chromatin modifying protein 1A                                          |
| 0.00 | 0.02 | 136.36  | 76.17   | 1.79 | 1374872_at   | Rasgrp2    | RAS guanyl releasing protein 2 (calcium and DAG-regulated)              |
| 0.00 | 0.03 | 191.24  | 106.93  | 1.79 | 1398425_at   | Fam110b    | family with sequence similarity 110, member B                           |
| 0.00 | 0.02 | 103.31  | 57.77   | 1.79 | 1391193_at   | NA         | NA                                                                      |
| 0.00 | 0.03 | 233.74  | 130.71  | 1.79 | 1385919_at   | NA         | NA                                                                      |
| 0.00 | 0.03 | 103.91  | 58.32   | 1.78 | 1388740_at   | Fermt3     | fermitin family homolog 3 (Drosophila)                                  |
| 0.00 | 0.02 | 675.88  | 379.84  | 1.78 | 1374412_at   | Fbxw11     | F-box and WD repeat domain containing 11                                |
| 0.00 | 0.04 | 71.03   | 39.98   | 1.78 | 1374355_at   | Fam113b    | family with sequence similarity 113, member B                           |
| 0.00 | 0.02 | 53.44   | 30.10   | 1.78 | 1397209_at   | RGD1565712 | similar to Hypothetical protein MGC59495                                |
| 0.00 | 0.03 | 192.32  | 108.49  | 1.77 | 1387205_at   | H2-M3      | histocompatibility 2, M region locus 3                                  |
| 0.00 | 0.01 | 3912.24 | 2210.06 | 1.77 | 1388482_at   | Fam129b    | family with sequence similarity 129, member B                           |
| 0.00 | 0.04 | 24.91   | 14.08   | 1.77 | 1398528_at   | NA         | NA                                                                      |
| 0.00 | 0.01 | 141.47  | 80.00   | 1.77 | 1376766_at   | Fmn1       | formin-like 1                                                           |
| 0.00 | 0.03 | 44.24   | 25.03   | 1.77 | 1377153_a_at | Klh6       | kelch-like 6 (Drosophila)                                               |
| 0.00 | 0.03 | 791.99  | 449.17  | 1.76 | 1388551_at   | Pcdhgc3    | protocadherin gamma subfamily C, 3                                      |
| 0.00 | 0.02 | 2790.93 | 1588.36 | 1.76 | 1367907_a_at | Cltb       | clathrin, light chain (Lcb)                                             |
| 0.00 | 0.01 | 129.86  | 73.95   | 1.76 | 1389698_at   | NA         | NA                                                                      |
| 0.00 | 0.02 | 790.69  | 450.35  | 1.76 | 1377594_at   | Shc1       | SHC (Src homology 2 domain containing) transforming protein 1           |
| 0.00 | 0.04 | 95.03   | 54.16   | 1.75 | 1391671_at   | LOC689165  | hypothetical protein LOC689165                                          |
| 0.00 | 0.02 | 132.03  | 75.37   | 1.75 | 1371285_at   | Hoxc4      | homeo box C4                                                            |
| 0.00 | 0.02 | 286.02  | 163.50  | 1.75 | 1385090_at   | Rad17      | RAD17 homolog (S. pombe)                                                |
| 0.00 | 0.03 | 153.84  | 88.05   | 1.75 | 1384943_at   | RGD1563888 | similar to DNA segment, Chr 16, ERATO Doi 472, expressed                |
| 0.00 | 0.04 | 126.94  | 72.66   | 1.75 | 1374784_at   | Prtfdc1    | phosphoribosyl transferase domain containing 1                          |
| 0.00 | 0.04 | 26.37   | 15.11   | 1.74 | 1391214_at   | Fam26f     | family with sequence similarity 26, member F                            |
| 0.00 | 0.04 | 469.30  | 269.03  | 1.74 | 1383169_at   | NA         | NA                                                                      |
| 0.00 | 0.02 | 1066.27 | 612.15  | 1.74 | 1367942_at   | Acp5       | acid phosphatase 5, tartrate resistant                                  |
| 0.00 | 0.02 | 344.61  | 197.91  | 1.74 | 1387096_at   | Hps1       | Hermansky-Pudlak syndrome 1 homolog (human)                             |
| 0.00 | 0.04 | 37.98   | 21.84   | 1.74 | 1394715_at   | Dicer1     | dicer 1, ribonuclease type III                                          |
| 0.00 | 0.04 | 23.18   | 13.41   | 1.73 | 1380693_at   | NA         | NA                                                                      |
| 0.00 | 0.01 | 3842.26 | 2227.77 | 1.72 | 1388199_at   | Tacstd1    | tumor-associated calcium signal transducer 1                            |
| 0.00 | 0.04 | 51.69   | 29.98   | 1.72 | 1386069_at   | Sp2        | Sp2 transcription factor                                                |
| 0.00 | 0.03 | 6929.60 | 4021.58 | 1.72 | 1367578_at   | Prdx2      | peroxiredoxin 2                                                         |
| 0.00 | 0.03 | 94.79   | 55.02   | 1.72 | 1379592_at   | Slc25a13   | solute carrier family 25, member 13 (citrin)                            |
| 0.00 | 0.01 | 737.00  | 428.59  | 1.72 | 1383063_a_at | NA         | NA                                                                      |
| 0.00 | 0.02 | 97.62   | 57.09   | 1.71 | 1382587_at   | NA         | NA                                                                      |

|      |      |         |         |      |              |            |                                                                                 |
|------|------|---------|---------|------|--------------|------------|---------------------------------------------------------------------------------|
| 0.00 | 0.03 | 63.01   | 36.90   | 1.71 | 1385567_at   | Gtf2f1     | general transcription factor IIF, polypeptide 1                                 |
| 0.00 | 0.02 | 84.03   | 49.24   | 1.71 | 1377882_at   | Flt3       | fms-related tyrosine kinase 3                                                   |
| 0.00 | 0.04 | 236.07  | 138.69  | 1.70 | 1390422_at   | Pxk        | PX domain containing serine/threonine kinase                                    |
| 0.00 | 0.03 | 164.59  | 96.73   | 1.70 | 1388561_at   | NA         | NA                                                                              |
| 0.00 | 0.02 | 2530.86 | 1488.50 | 1.70 | 1371336_at   | Hn1        | hematological and neurological expressed 1                                      |
| 0.00 | 0.04 | 133.87  | 78.75   | 1.70 | 1392722_at   | Dapp1      | dual adaptor of phosphotyrosine and 3-phosphoinositides                         |
| 0.00 | 0.04 | 243.16  | 143.06  | 1.70 | 1373734_at   | Slco3a1    | solute carrier organic anion transporter family, member 3a1                     |
| 0.00 | 0.03 | 278.53  | 164.09  | 1.70 | 1387264_at   | Kcnk6      | potassium inwardly-rectifying channel, subfamily K, member 6                    |
| 0.00 | 0.02 | 628.63  | 370.46  | 1.70 | 1371769_at   | Scamp2     | secretory carrier membrane protein 2                                            |
| 0.00 | 0.04 | 36.97   | 21.79   | 1.70 | 1394122_at   | Rhoh       | ras homolog gene family, member H                                               |
| 0.00 | 0.02 | 791.22  | 467.30  | 1.69 | 1370298_at   | Znf394     | zinc finger protein 394                                                         |
| 0.00 | 0.04 | 46.83   | 27.75   | 1.69 | 1378929_at   | NA         | NA                                                                              |
| 0.00 | 0.04 | 16.63   | 9.85    | 1.69 | 1370499_at   | Klr1a      | killer cell lectin-like receptor subfamily B, member 1A                         |
| 0.00 | 0.02 | 19.13   | 11.36   | 1.68 | 1376872_at   | Plxnc1     | plexin C1                                                                       |
| 0.00 | 0.03 | 2450.18 | 1455.62 | 1.68 | 1371358_at   | Gpsn2      | glycoprotein, synaptic 2                                                        |
| 0.00 | 0.01 | 171.39  | 102.01  | 1.68 | 1368567_at   | Ndufv3     | NADH dehydrogenase (ubiquinone) flavoprotein 3                                  |
| 0.00 | 0.02 | 291.54  | 173.72  | 1.68 | 1375645_at   | RGD1560286 | similar to DNA segment, Chr 4, ERATO Doi 22, expressed                          |
| 0.00 | 0.04 | 234.32  | 139.76  | 1.68 | 1367948_a_at | Kdr        | kinase insert domain protein receptor                                           |
| 0.00 | 0.02 | 92.56   | 55.26   | 1.67 | 1378149_at   | Vps26b     | vacuolar protein sorting 26 homolog B (S. pombe)                                |
| 0.00 | 0.03 | 144.55  | 86.32   | 1.67 | 1392292_at   | Kctd5      | potassium channel tetramerisation domain containing 5                           |
| 0.00 | 0.04 | 136.91  | 81.79   | 1.67 | 1370942_at   | Rasa3      | RAS p21 protein activator 3                                                     |
| 0.00 | 0.04 | 44.05   | 26.32   | 1.67 | 1373358_at   | Usp8       | ubiquitin specific peptidase 8                                                  |
| 0.00 | 0.03 | 66.41   | 39.69   | 1.67 | 1392767_at   | NA         | NA                                                                              |
| 0.00 | 0.04 | 1194.25 | 714.96  | 1.67 | 1373501_at   | Nek7       | NIMA (never in mitosis gene a)-related kinase 7                                 |
| 0.00 | 0.04 | 767.66  | 460.40  | 1.67 | 1398918_at   | Zfand3     | zinc finger, AN1-type domain 3                                                  |
| 0.00 | 0.04 | 19.37   | 11.62   | 1.67 | 1392862_at   | NA         | NA                                                                              |
| 0.00 | 0.02 | 613.87  | 368.84  | 1.66 | 1374394_at   | Wbp2       | WW domain binding protein 2                                                     |
| 0.00 | 0.04 | 52.54   | 31.57   | 1.66 | 1380245_at   | NA         | NA                                                                              |
| 0.00 | 0.04 | 1137.83 | 684.02  | 1.66 | 1369996_at   | Polr2f     | polymerase (RNA) II (DNA directed) polypeptide F                                |
| 0.00 | 0.04 | 247.11  | 148.81  | 1.66 | 1371673_at   | Vps72      | vacuolar protein sorting 72 homolog (S. cerevisiae)                             |
| 0.00 | 0.02 | 17.50   | 10.54   | 1.66 | 1392671_at   | NA         | NA                                                                              |
| 0.00 | 0.03 | 410.43  | 247.45  | 1.66 | 1368386_at   | Grb2       | growth factor receptor bound protein 2                                          |
| 0.00 | 0.04 | 493.09  | 297.45  | 1.66 | 1373385_at   | NA         | NA                                                                              |
| 0.00 | 0.02 | 45.48   | 27.52   | 1.65 | 1388203_x_at | RT1-Aw2    | RT1 class Ib, locus Aw2                                                         |
| 0.00 | 0.02 | 95.15   | 57.66   | 1.65 | 1384337_x_at | Cln3       | ceroid-lipofuscinosis, neuronal 3                                               |
| 0.00 | 0.02 | 3565.15 | 2165.86 | 1.65 | 1367599_at   | Atp5g1     | ATP synthase, H+ transporting, mitochondrial F0 complex, subunit C1 (subunit 9) |
| 0.00 | 0.02 | 28.88   | 17.62   | 1.64 | 1379763_at   | Smg7       | Smg-7 homolog, nonsense mediated mRNA decay factor (C. elegans)                 |
| 0.00 | 0.04 | 490.44  | 299.70  | 1.64 | 1371389_at   | LOC306766  | hypothetical LOC306766                                                          |
| 0.00 | 0.02 | 219.88  | 134.49  | 1.63 | 1394815_at   | RGD1559505 | similar to RIKEN cDNA 9030409E16                                                |
| 0.00 | 0.04 | 46.78   | 28.64   | 1.63 | 1389827_at   | Fdx1       | ferredoxin 1                                                                    |

|      |      |         |         |      |              |            |                                                                      |
|------|------|---------|---------|------|--------------|------------|----------------------------------------------------------------------|
| 0.00 | 0.02 | 170.44  | 104.36  | 1.63 | 1369042_at   | Pigm       | phosphatidylinositol glycan anchor biosynthesis, class M             |
| 0.00 | 0.03 | 40.55   | 24.90   | 1.63 | 1388940_at   | Arhgap25   | Rho GTPase activating protein 25                                     |
| 0.00 | 0.02 | 223.57  | 137.61  | 1.62 | 1399124_at   | RGD1310427 | similar to KIAA0090 protein                                          |
| 0.00 | 0.03 | 182.73  | 112.82  | 1.62 | 1386346_at   | Tmem19     | transmembrane protein 19                                             |
| 0.00 | 0.04 | 81.87   | 50.78   | 1.61 | 1384191_at   | NA         | NA                                                                   |
| 0.00 | 0.02 | 124.81  | 77.63   | 1.61 | 1380450_at   | Bzrap1     | benzodiazapine receptor associated protein 1                         |
| 0.00 | 0.03 | 51.84   | 32.30   | 1.61 | 1393612_a_at | Depdc7     | DEP domain containing 7                                              |
| 0.00 | 0.04 | 73.95   | 46.14   | 1.60 | 1397411_at   | Fgd2       | FYVE, RhoGEF and PH domain containing 2                              |
| 0.00 | 0.03 | 103.98  | 64.89   | 1.60 | 1394808_at   | Tm9sf4     | transmembrane 9 superfamily protein member 4                         |
| 0.00 | 0.04 | 540.55  | 337.55  | 1.60 | 1367767_at   | Hmgcl      | 3-hydroxymethyl-3-methylglutaryl-Coenzyme A lyase                    |
| 0.00 | 0.04 | 62.30   | 38.96   | 1.60 | 1383493_at   | NA         | NA                                                                   |
| 0.00 | 0.04 | 60.91   | 38.16   | 1.60 | 1380555_at   | Faf2       | Fas associated factor family member 2                                |
| 0.00 | 0.04 | 25.21   | 15.83   | 1.59 | 1386311_at   | NA         | NA                                                                   |
| 0.00 | 0.02 | 1825.73 | 1146.64 | 1.59 | 1371724_at   | Rexo2      | REX2, RNA exonuclease 2 homolog (S. cerevisiae)                      |
| 0.00 | 0.04 | 68.93   | 43.35   | 1.59 | 1391091_at   | Cyld       | cylindromatosis (turban tumor syndrome)                              |
| 0.00 | 0.04 | 140.15  | 88.20   | 1.59 | 1381263_at   | NA         | NA                                                                   |
| 0.00 | 0.04 | 80.26   | 50.54   | 1.59 | 1377698_at   | Cd40       | CD40 molecule, TNF receptor superfamily member 5                     |
| 0.00 | 0.04 | 215.78  | 136.22  | 1.58 | 1389729_at   | Rilpl2     | Rab interacting lysosomal protein-like 2                             |
| 0.00 | 0.02 | 75.06   | 47.63   | 1.58 | 1382917_at   | NA         | NA                                                                   |
| 0.00 | 0.04 | 79.82   | 50.67   | 1.58 | 1376255_at   | Map4k1     | mitogen activated protein kinase kinase kinase kinase 1              |
| 0.00 | 0.03 | 1959.06 | 1252.16 | 1.56 | 1398897_at   | Ube2v1     | ubiquitin-conjugating enzyme E2 variant 1                            |
| 0.00 | 0.04 | 633.91  | 405.48  | 1.56 | 1372355_at   | NA         | NA                                                                   |
| 0.00 | 0.02 | 110.66  | 70.91   | 1.56 | 1370772_a_at | Hfe        | hemochromatosis                                                      |
| 0.00 | 0.04 | 115.43  | 74.27   | 1.55 | 1387596_at   | F2r1       | coagulation factor II (thrombin) receptor-like 1                     |
| 0.00 | 0.03 | 1557.09 | 1005.11 | 1.55 | 1388455_at   | Gng10      | guanine nucleotide binding protein (G protein), gamma 10             |
| 0.00 | 0.04 | 95.84   | 62.14   | 1.54 | 1396485_at   | Btbd10     | BTB (POZ) domain containing 10                                       |
| 0.00 | 0.02 | 26.34   | 17.11   | 1.54 | 1368675_at   | Chn2       | chimerin (chimaerin) 2                                               |
| 0.00 | 0.04 | 279.80  | 182.78  | 1.53 | 1399083_at   | Abhd11     | abhydrolase domain containing 11                                     |
| 0.00 | 0.03 | 139.68  | 91.26   | 1.53 | 1390946_at   | NA         | NA                                                                   |
| 0.00 | 0.04 | 481.16  | 314.98  | 1.53 | 1367621_at   | Dapk3      | death-associated protein kinase 3                                    |
| 0.00 | 0.04 | 15.02   | 9.90    | 1.52 | 1396186_at   | NA         | NA                                                                   |
| 0.00 | 0.02 | 402.86  | 265.84  | 1.52 | 1398375_at   | Mta3       | metastasis associated 1 family, member 3                             |
| 0.00 | 0.03 | 2911.16 | 1921.28 | 1.52 | 1367827_at   | Ppp2cb     | protein phosphatase 2 (formerly 2A), catalytic subunit, beta isoform |
| 0.00 | 0.03 | 42.26   | 27.90   | 1.51 | 1375543_at   | Rnf149     | ring finger protein 149                                              |
| 0.00 | 0.04 | 58.46   | 38.64   | 1.51 | 1370469_at   | Ptpn7      | protein tyrosine phosphatase, non-receptor type 7                    |
| 0.00 | 0.03 | 1878.14 | 1243.56 | 1.51 | 1371526_at   | Rnf10      | ring finger protein 10                                               |
| 0.00 | 0.04 | 119.40  | 79.48   | 1.50 | 1371256_at   | Ptpn18     | protein tyrosine phosphatase, non-receptor type 18                   |
| 0.00 | 0.03 | 4775.94 | 3183.10 | 1.50 | 1370888_at   | Cox5a      | cytochrome c oxidase, subunit Va                                     |
| 0.00 | 0.03 | 124.67  | 83.19   | 1.50 | 1368231_at   | Stat5a     | signal transducer and activator of transcription 5A                  |
| 0.00 | 0.04 | 128.83  | 85.99   | 1.50 | 1390431_at   | NA         | NA                                                                   |

|      |      |          |         |      |              |            |                                                                                                               |
|------|------|----------|---------|------|--------------|------------|---------------------------------------------------------------------------------------------------------------|
| 0.00 | 0.03 | 174.23   | 116.61  | 1.49 | 1372034_at   | Parp14     | poly (ADP-ribose) polymerase family, member 14                                                                |
| 0.00 | 0.04 | 101.94   | 68.25   | 1.49 | 1383526_at   | NA         | NA                                                                                                            |
| 0.00 | 0.04 | 8541.76  | 5719.32 | 1.49 | 1388356_at   | S100a16    | S100 calcium binding protein A16                                                                              |
| 0.00 | 0.04 | 12.88    | 8.65    | 1.49 | 1392703_at   | Tbx4       | T-box 4                                                                                                       |
| 0.00 | 0.04 | 282.69   | 191.29  | 1.48 | 1392203_at   | NA         | NA                                                                                                            |
| 0.00 | 0.03 | 38.94    | 26.36   | 1.48 | 1381898_at   | NA         | NA                                                                                                            |
| 0.00 | 0.04 | 46.26    | 31.34   | 1.48 | 1393060_at   | Adamtsl2   | ADAMTS-like 2                                                                                                 |
| 0.00 | 0.04 | 11.50    | 7.81    | 1.47 | 1396250_at   | Coro1c     | coronin, actin binding protein 1C                                                                             |
| 0.00 | 0.04 | 1027.22  | 698.82  | 1.47 | 1371502_at   | Rbm42      | RNA binding motif protein 42                                                                                  |
| 0.00 | 0.03 | 26.97    | 18.38   | 1.47 | 1368882_at   | St6galnac3 | ST6 (alpha-N-acetyl-neuraminyl-2,3-beta-galactosyl-1,3)-N-acetylgalactosaminide alpha-2,6-sialyltransferase 3 |
| 0.00 | 0.04 | 239.35   | 163.62  | 1.46 | 1368295_at   | Slco2b1    | solute carrier organic anion transporter family, member 2b1                                                   |
| 0.00 | 0.04 | 44.25    | 30.48   | 1.45 | 1379772_at   | Aplnr      | apelin receptor                                                                                               |
| 0.00 | 0.04 | 10927.59 | 7527.77 | 1.45 | 1369976_at   | Dynl1      | dynein light chain LC8-type 1                                                                                 |
| 0.00 | 0.03 | 45.70    | 31.59   | 1.45 | 1392032_at   | Grap       | GRB2-related adaptor protein translocase of outer mitochondrial membrane 6 homolog (yeast)                    |
| 0.00 | 0.03 | 1819.26  | 1263.07 | 1.44 | 1371399_at   | Tomm6      | proteasome (prosome, macropain) 26S subunit, non-ATPase, 11                                                   |
| 0.00 | 0.04 | 1236.98  | 864.42  | 1.43 | 1376069_at   | Psm11      | clathrin, light chain (Lca)                                                                                   |
| 0.00 | 0.04 | 4191.72  | 2944.09 | 1.42 | 1386875_a_at | Cita       | golgi SNAP receptor complex member 2                                                                          |
| 0.00 | 0.04 | 264.80   | 186.90  | 1.42 | 1375438_at   | Gosr2      | dpy-19-like 1 (C. elegans)                                                                                    |
| 0.00 | 0.03 | 98.74    | 69.79   | 1.41 | 1375174_at   | Dpy191     | G protein-coupled receptor 182                                                                                |
| 0.00 | 0.04 | 11.76    | 8.42    | 1.40 | 1392664_at   | Gpr182     | vacuolar protein sorting 52 homolog (S. cerevisiae)                                                           |
| 0.00 | 0.03 | 15.40    | 99.25   | 0.16 | 1394803_at   | Vps52      | zinc finger protein 451                                                                                       |
| 0.00 | 0.01 | 44.00    | 145.89  | 0.30 | 1394654_at   | Zfp451     | NA                                                                                                            |
| 0.00 | 0.03 | 12.31    | 38.38   | 0.32 | 1381553_at   | NA         | NA                                                                                                            |
| 0.00 | 0.01 | 15.80    | 46.90   | 0.34 | 1373759_at   | NA         | NA                                                                                                            |
| 0.00 | 0.01 | 197.46   | 581.40  | 0.34 | 1380850_at   | NA         | NA                                                                                                            |
| 0.00 | 0.03 | 209.81   | 605.56  | 0.35 | 1383697_at   | NA         | NA                                                                                                            |
| 0.00 | 0.01 | 165.86   | 478.66  | 0.35 | 1374529_at   | NA         | NA                                                                                                            |
| 0.00 | 0.02 | 31.37    | 88.35   | 0.36 | 1397443_at   | NA         | NA                                                                                                            |
| 0.00 | 0.03 | 182.90   | 480.51  | 0.38 | 1389503_at   | LOC367994  | similar to uropod 3B isoform b                                                                                |
| 0.00 | 0.03 | 41.51    | 108.67  | 0.38 | 1379232_at   | NA         | NA                                                                                                            |
| 0.00 | 0.02 | 299.83   | 761.40  | 0.39 | 1384916_at   | NA         | NA                                                                                                            |
| 0.00 | 0.01 | 238.34   | 604.85  | 0.39 | 1387122_at   | Plagl1     | pleiomorphic adenoma gene-like 1                                                                              |
| 0.00 | 0.02 | 56.15    | 138.02  | 0.41 | 1368721_at   | Ascl2      | achaete-scute complex homolog 2 (Drosophila)                                                                  |
| 0.00 | 0.04 | 102.35   | 249.87  | 0.41 | 1385436_at   | Tmc4       | transmembrane channel-like 4                                                                                  |
| 0.00 | 0.04 | 100.37   | 241.26  | 0.42 | 1379656_a_at | NA         | NA                                                                                                            |
| 0.00 | 0.03 | 29.96    | 71.41   | 0.42 | 1369773_at   | Bmp3       | bone morphogenetic protein 3                                                                                  |
| 0.00 | 0.03 | 168.74   | 399.45  | 0.42 | 1377967_at   | Cdt1       | chromatin licensing and DNA replication factor 1                                                              |
| 0.00 | 0.02 | 114.48   | 270.64  | 0.42 | 1380472_at   | LOC683587  | similar to carboxylesterase 5                                                                                 |
| 0.00 | 0.01 | 269.66   | 634.46  | 0.43 | 1391051_at   | NA         | NA                                                                                                            |
| 0.00 | 0.04 | 103.00   | 241.80  | 0.43 | 1378640_at   | Uhrf1      | ubiquitin-like with PHD and ring finger domains 1                                                             |
| 0.00 | 0.03 | 82.49    | 192.08  | 0.43 | 1391170_at   | Setd5      | SET domain containing 5                                                                                       |
| 0.00 | 0.01 | 277.79   | 644.80  | 0.43 | 1376411_at   | Arl13b     | ADP-ribosylation factor-like 13B                                                                              |
| 0.00 | 0.03 | 46.61    | 106.65  | 0.44 | 1392231_at   | Stk4       | serine/threonine kinase 4                                                                                     |



|      |      |         |         |      |              |                 |                                                                                                         |
|------|------|---------|---------|------|--------------|-----------------|---------------------------------------------------------------------------------------------------------|
| 0.00 | 0.03 | 227.69  | 515.20  | 0.44 | 1374775_at   | Mki67           | antigen identified by monoclonal antibody Ki-67                                                         |
| 0.00 | 0.02 | 32.68   | 73.59   | 0.44 | 1392954_at   | NA              | NA                                                                                                      |
| 0.00 | 0.02 | 155.58  | 348.11  | 0.45 | 1398566_at   | NA              | NA                                                                                                      |
| 0.00 | 0.01 | 92.77   | 207.44  | 0.45 | 1382720_at   | NA              | NA                                                                                                      |
| 0.00 | 0.02 | 387.07  | 860.90  | 0.45 | 1373118_at   | rCG_58914       | similar to Protein KIAA1543                                                                             |
| 0.00 | 0.01 | 437.74  | 966.49  | 0.45 | 1398382_at   | Nat13           | N-acetyltransferase 13                                                                                  |
| 0.00 | 0.03 | 245.90  | 541.40  | 0.45 | 1379510_at   | NA              | NA                                                                                                      |
| 0.00 | 0.01 | 121.57  | 267.63  | 0.45 | 1383978_at   | NA              | NA                                                                                                      |
| 0.00 | 0.03 | 22.88   | 50.27   | 0.46 | 1384542_at   | NA              | NA                                                                                                      |
| 0.00 | 0.04 | 52.34   | 113.58  | 0.46 | 1385533_at   | NA              | NA                                                                                                      |
| 0.00 | 0.02 | 59.59   | 128.79  | 0.46 | 1378170_at   | Aff4            | AF4/FMR2 family, member 4                                                                               |
| 0.00 | 0.03 | 124.86  | 269.11  | 0.46 | 1381764_s_at | Rnf126          | ring finger protein 126                                                                                 |
| 0.00 | 0.01 | 185.31  | 399.08  | 0.46 | 1392111_at   | Exosc3          | exosome component 3                                                                                     |
| 0.00 | 0.03 | 2054.20 | 4421.12 | 0.46 | 1370912_at   | Hspa1b          | heat shock 70kD protein 1B (mapped)                                                                     |
| 0.00 | 0.04 | 67.62   | 145.21  | 0.47 | 1385132_at   | NA              | NA                                                                                                      |
| 0.00 | 0.02 | 382.28  | 815.26  | 0.47 | 1376786_a_at | NA              | NA                                                                                                      |
| 0.00 | 0.02 | 126.82  | 269.86  | 0.47 | 1398521_at   | NA              | NA                                                                                                      |
| 0.00 | 0.01 | 216.41  | 457.60  | 0.47 | 1389444_at   | Zdhhc20         | zinc finger, DHHC-type containing 20                                                                    |
| 0.00 | 0.01 | 159.73  | 337.52  | 0.47 | 1370367_at   | Slc1a1          | solute carrier family 1 (neuronal/epithelial high affinity glutamate transporter, system Xag), member 1 |
| 0.00 | 0.02 | 497.41  | 1039.67 | 0.48 | 1382255_at   | NA              | NA                                                                                                      |
| 0.00 | 0.03 | 415.84  | 868.46  | 0.48 | 1383102_at   | NA              | NA                                                                                                      |
| 0.00 | 0.03 | 214.67  | 445.69  | 0.48 | 1391063_at   | Kif23           | kinesin family member 23                                                                                |
| 0.00 | 0.01 | 2870.48 | 5944.73 | 0.48 | 1387022_at   | Aldh1a1         | aldehyde dehydrogenase 1 family, member A1                                                              |
| 0.00 | 0.03 | 213.02  | 440.78  | 0.48 | 1374530_at   | Fzd7            | frizzled homolog 7 (Drosophila)                                                                         |
| 0.00 | 0.04 | 415.71  | 859.78  | 0.48 | 1381925_x_at | Arid1b          | AT rich interactive domain 1B (Swi1 like)                                                               |
| 0.00 | 0.01 | 128.61  | 263.86  | 0.49 | 1383164_at   | NA              | NA                                                                                                      |
| 0.00 | 0.03 | 570.49  | 1163.94 | 0.49 | 1373566_at   | NA              | NA                                                                                                      |
| 0.00 | 0.03 | 219.84  | 447.00  | 0.49 | 1383675_at   | NA              | NA                                                                                                      |
| 0.00 | 0.03 | 157.76  | 320.13  | 0.49 | 1385689_at   | NA              | NA                                                                                                      |
| 0.00 | 0.01 | 278.18  | 564.35  | 0.49 | 1373229_at   | Lsm12           | LSM12 homolog (S. cerevisiae)                                                                           |
| 0.00 | 0.01 | 35.90   | 72.79   | 0.49 | 1369050_at   | Pik3c2g         | phosphoinositide-3-kinase, class 2, gamma polypeptide                                                   |
| 0.00 | 0.03 | 32.95   | 66.31   | 0.50 | 1383112_at   | Trps1           | trichorhinophalangeal syndrome I homolog (human)                                                        |
| 0.00 | 0.02 | 139.35  | 280.34  | 0.50 | 1382242_at   | Zfp451          | zinc finger protein 451                                                                                 |
| 0.00 | 0.02 | 146.08  | 293.41  | 0.50 | 1389784_at   | Pogz            | pogo transposable element with ZNF domain                                                               |
| 0.00 | 0.01 | 109.29  | 218.79  | 0.50 | 1374403_at   | Efnb1           | ephrin B1                                                                                               |
| 0.00 | 0.03 | 320.99  | 641.84  | 0.50 | 1392454_at   | Znhit6          | zinc finger, HIT type 6                                                                                 |
| 0.00 | 0.03 | 32.93   | 65.68   | 0.50 | 1385965_at   | Ankhd1-Eif4ebp3 | Ankhd1-Eif4ebp3 fusion transcript                                                                       |
| 0.00 | 0.01 | 73.22   | 144.53  | 0.51 | 1388924_at   | Angptl4         | angiopoietin-like 4                                                                                     |
| 0.00 | 0.02 | 249.86  | 492.87  | 0.51 | 1380182_at   | RGD1563437      | similar to KIAA1217                                                                                     |
| 0.00 | 0.03 | 78.80   | 155.16  | 0.51 | 1376842_at   | NA              | NA                                                                                                      |
| 0.00 | 0.01 | 345.94  | 680.54  | 0.51 | 1393226_at   | NA              | NA                                                                                                      |
| 0.00 | 0.04 | 169.53  | 329.27  | 0.51 | 1374579_at   | RGD1560873      | similar to RIKEN cDNA E230015L20 gene                                                                   |
| 0.00 | 0.02 | 39.65   | 76.92   | 0.52 | 1384210_at   | Micalcl         | MICAL C-terminal like                                                                                   |
| 0.00 | 0.03 | 71.86   | 139.16  | 0.52 | 1393021_at   | NA              | NA                                                                                                      |

|      |      |         |         |      |            |            |                                                                                |
|------|------|---------|---------|------|------------|------------|--------------------------------------------------------------------------------|
| 0.00 | 0.01 | 686.70  | 1326.23 | 0.52 | 1381145_at | NA         | NA                                                                             |
| 0.00 | 0.03 | 1396.82 | 2695.33 | 0.52 | 1369968_at | Ptn        | pleiotrophin                                                                   |
| 0.00 | 0.03 | 104.01  | 200.52  | 0.52 | 1391486_at | NA         | NA                                                                             |
| 0.00 | 0.01 | 51.63   | 99.50   | 0.52 | 1388198_at | Nupl1      | nucleoporin like 1                                                             |
| 0.00 | 0.01 | 175.99  | 338.53  | 0.52 | 1374425_at | Tle1       | transducin-like enhancer of split 1 (E(sp1) homolog, Drosophila)               |
| 0.00 | 0.02 | 199.25  | 382.49  | 0.52 | 1379982_at | NA         | NA                                                                             |
| 0.00 | 0.02 | 100.27  | 192.15  | 0.52 | 1380431_at | RGD1308772 | similar to KIAA0564 protein                                                    |
| 0.00 | 0.04 | 17.78   | 34.07   | 0.52 | 1375088_at | NA         | NA                                                                             |
| 0.00 | 0.01 | 250.84  | 479.87  | 0.52 | 1389072_at | Mtmr4      | myotubularin related protein 4                                                 |
| 0.00 | 0.02 | 793.42  | 1515.38 | 0.52 | 1387917_at | Tor1aip1   | torsin A interacting protein 1                                                 |
| 0.00 | 0.02 | 40.52   | 77.18   | 0.52 | 1390949_at | NA         | NA                                                                             |
| 0.00 | 0.02 | 58.23   | 110.77  | 0.53 | 1391059_at | Npw        | neuropeptide W                                                                 |
| 0.00 | 0.04 | 162.86  | 309.21  | 0.53 | 1382967_at | Gpr64      | G protein-coupled receptor 64                                                  |
| 0.00 | 0.02 | 27.46   | 52.12   | 0.53 | 1384179_at | NA         | NA                                                                             |
| 0.00 | 0.02 | 34.04   | 64.46   | 0.53 | 1391157_at | NA         | NA                                                                             |
| 0.00 | 0.03 | 81.41   | 154.09  | 0.53 | 1376917_at | Znf292     | zinc finger protein 292                                                        |
| 0.00 | 0.02 | 107.84  | 203.12  | 0.53 | 1390823_at | Skp2       | S-phase kinase-associated protein 2 (p45)                                      |
| 0.00 | 0.04 | 518.52  | 976.50  | 0.53 | 1370007_at | Pdia4      | protein disulfide isomerase family A, member 4                                 |
| 0.00 | 0.04 | 231.15  | 435.26  | 0.53 | 1399140_at | NA         | NA                                                                             |
| 0.00 | 0.01 | 287.48  | 541.29  | 0.53 | 1393216_at | Slc33a1    | solute carrier family 33 (acetyl-CoA transporter), member 1                    |
| 0.00 | 0.03 | 531.58  | 999.29  | 0.53 | 1383573_at | Tshz1      | teashirt zinc finger homeobox 1                                                |
| 0.00 | 0.03 | 95.59   | 179.28  | 0.53 | 1373249_at | Ubl4       | ubiquitin-like 4                                                               |
| 0.00 | 0.02 | 54.26   | 101.67  | 0.53 | 1373801_at | NA         | NA                                                                             |
| 0.00 | 0.04 | 33.75   | 63.19   | 0.53 | 1376747_at | NA         | NA                                                                             |
| 0.00 | 0.02 | 488.40  | 913.34  | 0.53 | 1369072_at | Adh7       | alcohol dehydrogenase 7 (class IV), mu or sigma polypeptide                    |
| 0.00 | 0.03 | 83.37   | 155.91  | 0.53 | 1395503_at | Ears2      | glutamyl-tRNA synthetase 2 mitochondrial (putative)                            |
| 0.00 | 0.04 | 99.93   | 186.78  | 0.53 | 1383607_at | NA         | NA                                                                             |
| 0.00 | 0.01 | 59.03   | 110.30  | 0.54 | 1378327_at | Dmrt2      | doublesex and mab-3 related transcription factor 2                             |
| 0.00 | 0.04 | 853.41  | 1590.07 | 0.54 | 1388453_at | Myadm      | myeloid-associated differentiation marker                                      |
| 0.00 | 0.04 | 97.74   | 181.93  | 0.54 | 1381687_at | RGD1309077 | similar to putative RNA methyltransferase                                      |
| 0.00 | 0.03 | 124.60  | 230.81  | 0.54 | 1391445_at | NA         | NA                                                                             |
| 0.00 | 0.03 | 140.27  | 259.81  | 0.54 | 1389797_at | NA         | NA                                                                             |
| 0.00 | 0.03 | 46.31   | 85.70   | 0.54 | 1394065_at | NA         | NA                                                                             |
| 0.00 | 0.04 | 35.61   | 65.86   | 0.54 | 1373802_at | Chm        | choroideremia (Rab escort protein 1)                                           |
| 0.00 | 0.04 | 88.82   | 164.04  | 0.54 | 1374868_at | NA         | NA                                                                             |
| 0.00 | 0.03 | 62.05   | 114.52  | 0.54 | 1390711_at | NA         | NA                                                                             |
| 0.00 | 0.04 | 37.66   | 69.41   | 0.54 | 1376847_at | LOC690745  | MOCO sulphurase C-terminal domain containing-like                              |
| 0.00 | 0.02 | 272.02  | 498.41  | 0.55 | 1373629_at | Slc7a6     | solute carrier family 7 (cationic amino acid transporter, y+ system), member 6 |
| 0.00 | 0.02 | 208.21  | 379.05  | 0.55 | 1370979_at | Ddx20      | DEAD (Asp-Glu-Ala-Asp) box polypeptide 20                                      |
| 0.00 | 0.03 | 1306.40 | 2377.59 | 0.55 | 1370976_at | G3bp1      | GTPase activating protein (SH3 domain) binding protein 1                       |
| 0.00 | 0.02 | 328.08  | 595.41  | 0.55 | 1374956_at | Pcm1       | pericentriolar material 1                                                      |
| 0.00 | 0.03 | 135.71  | 246.18  | 0.55 | 1389660_at | Amigo3     | adhesion molecule with Ig like domain 3                                        |

|      |      |         |         |      |              |            |                                                                 |
|------|------|---------|---------|------|--------------|------------|-----------------------------------------------------------------|
| 0.00 | 0.01 | 228.41  | 414.11  | 0.55 | 1370974_at   | Vps54      | vacuolar protein sorting 54 homolog ( <i>S. cerevisiae</i> )    |
| 0.00 | 0.03 | 415.20  | 752.46  | 0.55 | 1376634_a_at | LOC690728  | similar to Protein C12orf11 (Sarcoma antigen NY-SAR-95)         |
| 0.00 | 0.02 | 577.93  | 1046.85 | 0.55 | 1379336_at   | NA         | NA                                                              |
| 0.00 | 0.03 | 301.13  | 544.70  | 0.55 | 1368709_at   | Fut1       | fucosyltransferase 1 (galactoside 2-alpha-L-fucosyltransferase) |
| 0.00 | 0.04 | 1033.90 | 1863.60 | 0.55 | 1367923_at   | Acsbg1     | acyl-CoA synthetase bubblegum family member 1                   |
| 0.00 | 0.03 | 92.93   | 167.43  | 0.56 | 1385261_s_at | NA         | NA                                                              |
| 0.00 | 0.04 | 99.68   | 179.14  | 0.56 | 1374359_at   | Ccne2      | cyclin E2                                                       |
| 0.00 | 0.02 | 26.69   | 47.92   | 0.56 | 1388539_at   | Pkp2       | plakophilin 2                                                   |
| 0.00 | 0.02 | 221.97  | 398.39  | 0.56 | 1384439_at   | NA         | NA                                                              |
| 0.00 | 0.04 | 47.99   | 86.03   | 0.56 | 1397915_at   | NA         | NA                                                              |
| 0.00 | 0.03 | 204.57  | 366.58  | 0.56 | 1397301_at   | NA         | NA                                                              |
| 0.00 | 0.01 | 94.47   | 168.63  | 0.56 | 1373569_at   | NA         | NA                                                              |
| 0.00 | 0.02 | 469.49  | 837.53  | 0.56 | 1374036_at   | Mcm2       | minichromosome maintenance complex component 2                  |
| 0.00 | 0.02 | 1652.75 | 2948.12 | 0.56 | 1373499_at   | Gas5       | growth arrest specific 5                                        |
| 0.00 | 0.03 | 410.39  | 732.02  | 0.56 | 1373557_at   | Mcm4       | minichromosome maintenance complex component 4                  |
| 0.00 | 0.02 | 1415.29 | 2522.15 | 0.56 | 1377016_at   | Creld2     | cysteine-rich with EGF-like domains 2                           |
| 0.00 | 0.03 | 519.39  | 924.76  | 0.56 | 1390489_at   | Syncrip    | synaptotagmin binding, cytoplasmic RNA interacting protein      |
| 0.00 | 0.04 | 96.19   | 171.24  | 0.56 | 1391995_at   | Trim37     | tripartite motif-containing 37                                  |
| 0.00 | 0.04 | 349.22  | 620.87  | 0.56 | 1382521_at   | Gls        | glutaminase                                                     |
| 0.00 | 0.03 | 177.90  | 315.14  | 0.56 | 1393256_at   | Sephs1     | selenophosphate synthetase 1                                    |
| 0.00 | 0.02 | 31.64   | 55.81   | 0.57 | 1370997_at   | Homer1     | homer homolog 1 ( <i>Drosophila</i> )                           |
| 0.00 | 0.03 | 113.76  | 200.54  | 0.57 | 1393459_at   | Fmr1       | fragile X mental retardation 1                                  |
| 0.00 | 0.02 | 31.71   | 55.88   | 0.57 | 1377444_at   | NA         | NA                                                              |
| 0.00 | 0.02 | 349.03  | 613.92  | 0.57 | 1378637_at   | Nfx1       | nuclear transcription factor, X-box binding 1                   |
| 0.00 | 0.02 | 90.48   | 158.99  | 0.57 | 1384144_at   | Nxn        | nucleoredoxin                                                   |
| 0.00 | 0.03 | 181.20  | 318.29  | 0.57 | 1389127_at   | NA         | NA                                                              |
| 0.00 | 0.04 | 221.01  | 387.91  | 0.57 | 1390468_at   | NA         | NA                                                              |
| 0.00 | 0.02 | 120.61  | 211.54  | 0.57 | 1380118_at   | RGD1562252 | similar to hypothetical gene supported by AK085276              |
| 0.00 | 0.01 | 97.44   | 170.88  | 0.57 | 1393465_at   | NA         | NA                                                              |
| 0.00 | 0.03 | 428.44  | 750.84  | 0.57 | 1372626_at   | Tpd5211    | tumor protein D52-like 1                                        |
| 0.00 | 0.03 | 441.45  | 772.48  | 0.57 | 1367505_at   | Znf644     | zinc finger protein 644                                         |
| 0.00 | 0.02 | 144.13  | 250.61  | 0.58 | 1370663_at   | Wee1       | wee 1 homolog ( <i>S. pombe</i> )                               |
| 0.00 | 0.02 | 21.56   | 37.38   | 0.58 | 1374977_at   | NA         | NA                                                              |
| 0.00 | 0.02 | 192.14  | 333.08  | 0.58 | 1377004_at   | NA         | NA                                                              |
| 0.00 | 0.03 | 73.35   | 126.88  | 0.58 | 1376779_at   | Foxo1      | forkhead box O1                                                 |
| 0.00 | 0.02 | 148.68  | 257.16  | 0.58 | 1385043_at   | Inadl      | InaD-like ( <i>Drosophila</i> )                                 |
| 0.00 | 0.01 | 103.03  | 177.98  | 0.58 | 1383642_at   | NA         | NA                                                              |
| 0.00 | 0.03 | 79.35   | 137.07  | 0.58 | 1383522_at   | Utx        | ubiquitously transcribed tetratricopeptide repeat, X chromosome |
| 0.00 | 0.01 | 220.10  | 379.72  | 0.58 | 1391286_at   | NA         | NA                                                              |
| 0.00 | 0.02 | 494.97  | 853.85  | 0.58 | 1372236_at   | Nod1       | nucleotide-binding oligomerization domain containing 1          |
| 0.00 | 0.02 | 136.13  | 234.62  | 0.58 | 1376947_at   | Rbbp6      | retinoblastoma binding protein 6                                |
| 0.00 | 0.02 | 92.17   | 158.56  | 0.58 | 1391161_at   | Whsc1      | Wolf-Hirschhorn syndrome candidate 1 (human)                    |
| 0.00 | 0.02 | 74.27   | 127.75  | 0.58 | 1377417_at   | LOC363328  | similar to TICAM-1                                              |

|      |      |         |         |      |              |            |                                                                                                   |
|------|------|---------|---------|------|--------------|------------|---------------------------------------------------------------------------------------------------|
| 0.00 | 0.04 | 68.35   | 117.54  | 0.58 | 1387162_at   | Tpsab1     | trypsin alpha/beta 1                                                                              |
| 0.00 | 0.04 | 420.97  | 723.21  | 0.58 | 1373250_at   | Anln       | anillin, actin binding protein                                                                    |
| 0.00 | 0.02 | 61.34   | 105.37  | 0.58 | 1395285_at   | NA         | NA                                                                                                |
| 0.00 | 0.03 | 159.88  | 274.57  | 0.58 | 1378334_a_at | NA         | NA                                                                                                |
| 0.00 | 0.04 | 61.88   | 106.08  | 0.58 | 1377418_at   | NA         | NA                                                                                                |
| 0.00 | 0.02 | 85.59   | 146.52  | 0.58 | 1378081_at   | NA         | NA                                                                                                |
| 0.00 | 0.03 | 140.79  | 241.01  | 0.58 | 1393365_at   | Chd1       | chromodomain helicase DNA binding protein 1                                                       |
| 0.00 | 0.04 | 199.47  | 341.30  | 0.58 | 1383660_at   | NA         | NA                                                                                                |
| 0.00 | 0.02 | 45.31   | 77.12   | 0.59 | 1385151_at   | NA         | NA                                                                                                |
| 0.00 | 0.04 | 89.05   | 151.21  | 0.59 | 1376026_at   | Donson     | downstream neighbor of SON                                                                        |
| 0.00 | 0.02 | 2474.10 | 4196.74 | 0.59 | 1385759_at   | Serpib10   | serine (or cysteine) peptidase inhibitor, clade B (ovalbumin), member 10                          |
| 0.00 | 0.01 | 17.04   | 28.89   | 0.59 | 1370643_a_at | Kalrn      | kalirin, RhoGEF kinase                                                                            |
| 0.00 | 0.01 | 463.31  | 784.62  | 0.59 | 1371685_at   | Kbtbd2     | kelch repeat and BTB (POZ) domain containing 2                                                    |
| 0.00 | 0.04 | 80.18   | 135.79  | 0.59 | 1383931_at   | NA         | NA                                                                                                |
| 0.00 | 0.03 | 308.58  | 522.18  | 0.59 | 1392452_at   | Phf14      | PHD finger protein 14                                                                             |
| 0.00 | 0.02 | 252.18  | 426.18  | 0.59 | 1377670_at   | Pcf11      | PCF11, cleavage and polyadenylation factor subunit, homolog (S. cerevisiae)                       |
| 0.00 | 0.03 | 273.82  | 462.61  | 0.59 | 1384172_at   | RGD1310474 | similar to KIAA0423                                                                               |
| 0.00 | 0.03 | 283.41  | 478.67  | 0.59 | 1371582_at   | Ilf2       | interleukin enhancer binding factor 2                                                             |
| 0.00 | 0.04 | 188.84  | 318.69  | 0.59 | 1393972_at   | Mtf2       | metal response element binding transcription factor 2                                             |
| 0.00 | 0.04 | 19.42   | 32.76   | 0.59 | 1375046_at   | Nacad      | NAC alpha domain containing                                                                       |
| 0.00 | 0.03 | 168.47  | 284.12  | 0.59 | 1392157_at   | Plxna2     | plexin A2                                                                                         |
| 0.00 | 0.01 | 451.97  | 761.13  | 0.59 | 1374702_at   | NA         | NA                                                                                                |
| 0.00 | 0.04 | 191.34  | 321.79  | 0.59 | 1383083_at   | Banp       | Btg3 associated nuclear protein                                                                   |
| 0.00 | 0.04 | 69.56   | 116.91  | 0.60 | 1392552_at   | Gatad2b    | GATA zinc finger domain containing 2B                                                             |
| 0.00 | 0.02 | 109.66  | 183.47  | 0.60 | 1379217_at   | Acvr1      | activin A receptor, type I                                                                        |
| 0.00 | 0.02 | 454.89  | 759.74  | 0.60 | 1381981_at   | NA         | NA                                                                                                |
| 0.00 | 0.02 | 319.20  | 532.72  | 0.60 | 1384246_at   | Smarca5    | SWI/SNF related, matrix associated, actin dependent regulator of chromatin, subfamily a, member 5 |
| 0.00 | 0.03 | 420.23  | 701.28  | 0.60 | 1388656_at   | NA         | NA                                                                                                |
| 0.00 | 0.02 | 20.79   | 34.53   | 0.60 | 1389160_at   | Eraf       | erythroid associated factor                                                                       |
| 0.00 | 0.02 | 2278.55 | 3777.84 | 0.60 | 1389301_at   | Mbnl2      | muscleblind-like 2                                                                                |
| 0.00 | 0.02 | 307.97  | 510.55  | 0.60 | 1383929_at   | NA         | NA                                                                                                |
| 0.00 | 0.04 | 122.58  | 202.62  | 0.60 | 1397918_at   | NA         | NA                                                                                                |
| 0.00 | 0.02 | 262.76  | 433.54  | 0.61 | 1393047_at   | Rnf217     | ring finger protein 217                                                                           |
| 0.00 | 0.04 | 187.03  | 308.10  | 0.61 | 1374794_at   | Kif15      | kinesin family member 15                                                                          |
| 0.00 | 0.02 | 542.20  | 890.72  | 0.61 | 1377577_at   | Gmps       | guanine monophosphate synthetase                                                                  |
| 0.00 | 0.02 | 150.67  | 247.38  | 0.61 | 1375948_at   | Alkbh5     | alkB, alkylation repair homolog 5 (E. coli)                                                       |
| 0.00 | 0.02 | 13.24   | 21.73   | 0.61 | 1391258_at   | NA         | NA                                                                                                |
| 0.00 | 0.03 | 10.51   | 17.25   | 0.61 | 1396980_at   | NA         | NA                                                                                                |
| 0.00 | 0.04 | 362.86  | 595.15  | 0.61 | 1372432_at   | Prpf3      | PRP3 pre-mRNA processing factor 3 homolog (S. cerevisiae)                                         |
| 0.00 | 0.03 | 544.48  | 892.64  | 0.61 | 1376687_at   | Usp1       | ubiquitin specific peptidase 1                                                                    |
| 0.00 | 0.04 | 25.17   | 41.23   | 0.61 | 1374880_at   | NA         | NA                                                                                                |
| 0.00 | 0.03 | 12.31   | 20.14   | 0.61 | 1396800_at   | NA         | NA                                                                                                |
| 0.00 | 0.03 | 30.10   | 49.24   | 0.61 | 1378174_at   | NA         | NA                                                                                                |
| 0.00 | 0.02 | 194.88  | 318.41  | 0.61 | 1377835_at   | Dock8      | dedicator of cytokinesis 8                                                                        |

|      |      |         |         |      |              |            |                                                                                          |
|------|------|---------|---------|------|--------------|------------|------------------------------------------------------------------------------------------|
| 0.00 | 0.02 | 161.40  | 263.31  | 0.61 | 1391682_at   | NA         | NA                                                                                       |
| 0.00 | 0.02 | 315.08  | 514.02  | 0.61 | 1374696_at   | NA         | NA                                                                                       |
| 0.00 | 0.04 | 718.54  | 1170.76 | 0.61 | 1389153_at   | Serbp1     | Serpine1 mRNA binding protein 1                                                          |
| 0.00 | 0.03 | 1794.19 | 2920.58 | 0.61 | 1370189_at   | Sfrs10     | splicing factor, arginine/serine-rich 10 (transformer 2 homolog, Drosophila)             |
| 0.00 | 0.04 | 787.01  | 1280.78 | 0.61 | 1371586_at   | Mrpl48     | mitochondrial ribosomal protein L48                                                      |
| 0.00 | 0.04 | 198.47  | 322.93  | 0.61 | 1379525_at   | Crls1      | cardiolipin synthase 1                                                                   |
| 0.00 | 0.03 | 22.68   | 36.89   | 0.61 | 1372598_at   | RGD1309651 | similar to 1190005I06Rik protein                                                         |
| 0.00 | 0.04 | 23.66   | 38.48   | 0.61 | 1395211_s_at | NA         | NA                                                                                       |
| 0.00 | 0.04 | 34.32   | 55.80   | 0.61 | 1387558_at   | Trpv4      | transient receptor potential cation channel, subfamily V, member 4                       |
| 0.00 | 0.04 | 520.06  | 844.91  | 0.62 | 1379942_at   | Sox2       | SRY (sex determining region Y)-box 2                                                     |
| 0.00 | 0.03 | 1328.91 | 2157.42 | 0.62 | 1393643_at   | Rcn1       | reticulocalbin 1, EF-hand calcium binding domain                                         |
| 0.00 | 0.03 | 211.65  | 343.06  | 0.62 | 1372396_at   | RGD1308026 | similar to 2310047B19Rik protein                                                         |
| 0.00 | 0.02 | 29.57   | 47.88   | 0.62 | 1386266_at   | NA         | NA                                                                                       |
| 0.00 | 0.02 | 1846.26 | 2989.29 | 0.62 | 1392543_at   | Rbbp4      | retinoblastoma binding protein 4                                                         |
| 0.00 | 0.02 | 441.64  | 713.25  | 0.62 | 1375845_at   | Aig1       | androgen-induced 1                                                                       |
| 0.00 | 0.04 | 392.37  | 632.02  | 0.62 | 1372117_at   | Mtmt10     | myotubularin related protein 10                                                          |
| 0.00 | 0.04 | 228.37  | 367.79  | 0.62 | 1384314_at   | Mtif2      | mitochondrial translational initiation factor 2                                          |
| 0.00 | 0.03 | 199.20  | 320.46  | 0.62 | 1375863_a_at | NA         | NA                                                                                       |
| 0.00 | 0.03 | 168.10  | 270.05  | 0.62 | 1392470_at   | NIPBL      | Nipped-B homolog (Drosophila)                                                            |
| 0.00 | 0.03 | 208.96  | 335.51  | 0.62 | 1378222_at   | NA         | NA                                                                                       |
| 0.00 | 0.04 | 359.21  | 576.55  | 0.62 | 1383606_at   | Tc2n       | tandem C2 domains, nuclear                                                               |
| 0.00 | 0.03 | 587.60  | 941.40  | 0.62 | 1392983_at   | Psmc12     | proteasome (prosome, macropain) 26S subunit, non-ATPase, 12                              |
| 0.00 | 0.02 | 564.28  | 904.02  | 0.62 | 1385883_at   | Zbtb11     | zinc finger and BTB domain containing 11                                                 |
| 0.00 | 0.04 | 1395.12 | 2232.08 | 0.63 | 1388783_at   | Hmgb1      | high mobility group box 1                                                                |
| 0.00 | 0.03 | 74.65   | 119.36  | 0.63 | 1377899_at   | RGD1304982 | similar to RIKEN cDNA 2810025M15                                                         |
| 0.00 | 0.03 | 145.66  | 232.78  | 0.63 | 1388462_at   | Sbk1       | SH3-binding domain kinase 1                                                              |
| 0.00 | 0.04 | 632.82  | 1010.97 | 0.63 | 1393345_at   | NA         | NA                                                                                       |
| 0.00 | 0.01 | 148.47  | 236.88  | 0.63 | 1378373_at   | NA         | NA                                                                                       |
| 0.00 | 0.03 | 398.94  | 636.14  | 0.63 | 1370899_at   | Sfpq       | splicing factor proline/glutamine rich (polypyrimidine tract binding protein associated) |
| 0.00 | 0.04 | 517.06  | 824.00  | 0.63 | 1374273_at   | NA         | NA                                                                                       |
| 0.00 | 0.03 | 1222.75 | 1948.29 | 0.63 | 1398622_at   | Crim1      | cysteine rich transmembrane BMP regulator 1 (chordin like)                               |
| 0.00 | 0.04 | 136.15  | 216.90  | 0.63 | 1393815_at   | Narg2      | NMDA receptor regulated 2                                                                |
| 0.00 | 0.04 | 77.10   | 122.61  | 0.63 | 1381252_at   | NA         | NA                                                                                       |
| 0.00 | 0.02 | 236.00  | 374.47  | 0.63 | 1374150_at   | NA         | NA                                                                                       |
| 0.00 | 0.02 | 29.68   | 46.99   | 0.63 | 1378596_at   | NA         | NA                                                                                       |
| 0.00 | 0.03 | 39.53   | 62.36   | 0.63 | 1392729_at   | NA         | NA                                                                                       |
| 0.00 | 0.04 | 55.17   | 86.85   | 0.64 | 1379001_at   | NA         | NA                                                                                       |
| 0.00 | 0.03 | 107.50  | 169.22  | 0.64 | 1396472_at   | NA         | NA                                                                                       |
| 0.00 | 0.02 | 724.00  | 1138.70 | 0.64 | 1373479_at   | Ppp3ca     | protein phosphatase 3 (formerly 2B), catalytic subunit, alpha isoform                    |
| 0.00 | 0.03 | 870.85  | 1368.82 | 0.64 | 1373021_at   | NA         | NA                                                                                       |
| 0.00 | 0.02 | 163.31  | 256.12  | 0.64 | 1398396_at   | NA         | NA                                                                                       |
| 0.00 | 0.02 | 896.77  | 1405.90 | 0.64 | 1374438_at   | Otud4      | OTU domain containing 4                                                                  |
| 0.00 | 0.04 | 36.73   | 57.57   | 0.64 | 1376526_at   | NA         | NA                                                                                       |
| 0.00 | 0.04 | 67.45   | 105.71  | 0.64 | 1398437_at   | NA         | NA                                                                                       |

|      |      |         |         |      |            |            |                                                                                                |
|------|------|---------|---------|------|------------|------------|------------------------------------------------------------------------------------------------|
| 0.00 | 0.03 | 109.60  | 171.60  | 0.64 | 1392131_at | NA         | NA                                                                                             |
| 0.00 | 0.03 | 30.76   | 48.16   | 0.64 | 1395896_at | NA         | NA                                                                                             |
| 0.00 | 0.02 | 256.05  | 400.83  | 0.64 | 1377202_at | Smc6l1     | SMC6 structural maintenance of chromosomes 6-like 1 (yeast)                                    |
| 0.00 | 0.03 | 284.22  | 444.26  | 0.64 | 1372779_at | B3gnt2     | UDP-GlcNAc:betaGal beta-1,3-N-acetylglucosaminyltransferase 2                                  |
| 0.00 | 0.03 | 238.49  | 372.69  | 0.64 | 1376864_at | Ccar1      | cell division cycle and apoptosis regulator 1                                                  |
| 0.00 | 0.04 | 181.52  | 283.20  | 0.64 | 1382461_at | Prmt7      | protein arginine methyltransferase 7                                                           |
| 0.00 | 0.03 | 352.47  | 549.44  | 0.64 | 1399156_at | Arid2      | AT rich interactive domain 2 (Arid-rfx like)                                                   |
| 0.00 | 0.02 | 366.86  | 571.54  | 0.64 | 1372785_at | Ash1l      | ash1 (absent, small, or homeotic)-like (Drosophila)                                            |
| 0.00 | 0.03 | 111.74  | 173.96  | 0.64 | 1381902_at | Znf292     | zinc finger protein 292                                                                        |
| 0.00 | 0.04 | 151.91  | 236.43  | 0.64 | 1374854_at | Pinx1      | PIN2-interacting protein 1                                                                     |
| 0.00 | 0.02 | 315.40  | 490.65  | 0.64 | 1383383_at | NA         | NA                                                                                             |
| 0.00 | 0.03 | 801.63  | 1245.43 | 0.64 | 1367527_at | NA         | NA                                                                                             |
| 0.00 | 0.02 | 103.06  | 159.63  | 0.65 | 1390615_at | Kpna1      | karyopherin (importin) alpha 1                                                                 |
| 0.00 | 0.03 | 81.54   | 126.05  | 0.65 | 1384937_at | Rbak       | RB-associated KRAB zinc finger                                                                 |
| 0.00 | 0.04 | 223.19  | 343.67  | 0.65 | 1378691_at | NA         | NA                                                                                             |
| 0.00 | 0.03 | 151.81  | 233.68  | 0.65 | 1389716_at | LOC691918  | similar to Centrosomal protein of 27 kDa (Cep27 protein)                                       |
| 0.00 | 0.04 | 318.33  | 488.30  | 0.65 | 1372120_at | Uba5       | ubiquitin-like modifier activating enzyme 5                                                    |
| 0.00 | 0.03 | 782.11  | 1198.34 | 0.65 | 1398389_at | NA         | NA                                                                                             |
| 0.00 | 0.04 | 125.04  | 191.35  | 0.65 | 1389757_at | RGD1310159 | similar to acetyl-coA dehydrogenase - related (111.6 kD) (5G231)                               |
| 0.00 | 0.04 | 855.20  | 1308.48 | 0.65 | 1389277_at | RGD1306148 | similar to KIAA0368                                                                            |
| 0.00 | 0.04 | 2758.72 | 4215.85 | 0.65 | 1367706_at | Vdac1      | voltage-dependent anion channel 1                                                              |
| 0.00 | 0.03 | 500.06  | 763.92  | 0.65 | 1391474_at | Med14      | mediator complex subunit 14                                                                    |
| 0.00 | 0.03 | 834.40  | 1274.57 | 0.65 | 1373862_at | Tmed7      | transmembrane emp24 protein transport domain containing 7                                      |
| 0.00 | 0.02 | 515.20  | 786.34  | 0.66 | 1376010_at | Prpf4b     | PRP4 pre-mRNA processing factor 4 homolog B (yeast)                                            |
| 0.00 | 0.03 | 3000.81 | 4576.94 | 0.66 | 1370283_at | Hspa5      | heat shock protein 5                                                                           |
| 0.00 | 0.03 | 12.53   | 19.11   | 0.66 | 1378270_at | Ppp1r3d    | protein phosphatase 1, regulatory subunit 3D                                                   |
| 0.00 | 0.03 | 451.79  | 686.22  | 0.66 | 1383093_at | NA         | NA                                                                                             |
| 0.00 | 0.04 | 2230.56 | 3381.27 | 0.66 | 1370170_at | Hnrmpu     | heterogeneous nuclear ribonucleoprotein U                                                      |
| 0.00 | 0.03 | 153.83  | 233.17  | 0.66 | 1372836_at | NA         | NA                                                                                             |
| 0.00 | 0.03 | 30.17   | 45.67   | 0.66 | 1391681_at | Ccne2      | cyclin E2                                                                                      |
| 0.00 | 0.03 | 154.03  | 232.43  | 0.66 | 1377380_at | NA         | NA                                                                                             |
| 0.00 | 0.04 | 231.27  | 348.99  | 0.66 | 1372367_at | Grif1      | glucocorticoid receptor DNA binding factor 1                                                   |
| 0.00 | 0.03 | 111.08  | 167.52  | 0.66 | 1393492_at | NA         | NA                                                                                             |
| 0.00 | 0.04 | 72.80   | 109.67  | 0.66 | 1384479_at | Galnt3     | UDP-N-acetyl-alpha-D-galactosamine:polypeptide N-acetylgalactosaminyltransferase 3 (GalNAc-T3) |
| 0.00 | 0.04 | 60.15   | 90.58   | 0.66 | 1380997_at | Ccnj       | cyclin J                                                                                       |
| 0.00 | 0.03 | 172.11  | 258.81  | 0.66 | 1392546_at | NA         | NA                                                                                             |
| 0.00 | 0.03 | 99.00   | 148.86  | 0.67 | 1382875_at | Fam120b    | family with sequence similarity 120B                                                           |
| 0.00 | 0.04 | 86.66   | 130.20  | 0.67 | 1392920_at | Pdia3      | protein disulfide isomerase family A, member 3                                                 |
| 0.00 | 0.04 | 1373.25 | 2061.45 | 0.67 | 1372259_at | Dek        | DEK oncogene                                                                                   |
| 0.00 | 0.04 | 254.47  | 380.97  | 0.67 | 1388194_at | Dlat       | dihydroipoamide S-acetyltransferase                                                            |

|      |      |         |         |      |              |            |                                                                                                                                         |
|------|------|---------|---------|------|--------------|------------|-----------------------------------------------------------------------------------------------------------------------------------------|
| 0.00 | 0.04 | 196.77  | 294.47  | 0.67 | 1389527_at   | LOC378467  | promethin                                                                                                                               |
|      |      |         |         |      |              |            | similar to Putative RNA-binding protein 15 (RNA-binding motif protein 15) (One-twenty two protein)                                      |
| 0.00 | 0.04 | 421.01  | 627.86  | 0.67 | 1390576_at   | LOC684233  |                                                                                                                                         |
| 0.00 | 0.04 | 154.23  | 229.96  | 0.67 | 1380692_at   | Rbl1       | retinoblastoma-like 1 (p107)                                                                                                            |
| 0.00 | 0.03 | 59.51   | 88.70   | 0.67 | 1374634_at   | Pih1d2     | PIH1 domain containing 2                                                                                                                |
| 0.00 | 0.03 | 21.32   | 31.77   | 0.67 | 1398211_at   | NA         | NA                                                                                                                                      |
| 0.00 | 0.04 | 250.60  | 372.03  | 0.67 | 1382126_at   | Ncor1      | nuclear receptor co-repressor 1                                                                                                         |
| 0.00 | 0.04 | 86.71   | 128.61  | 0.67 | 1386217_at   | RGD1310474 | similar to KIAA0423                                                                                                                     |
| 0.00 | 0.03 | 1016.05 | 1504.16 | 0.68 | 1399046_at   | Top1       | topoisomerase (DNA) I                                                                                                                   |
| 0.00 | 0.03 | 255.30  | 377.80  | 0.68 | 1375941_at   | Baiap21    | BAI1-associated protein 2-like 1                                                                                                        |
| 0.00 | 0.04 | 295.04  | 436.40  | 0.68 | 1389361_at   | Cluap1     | clusterin associated protein 1                                                                                                          |
| 0.00 | 0.03 | 1381.75 | 2032.97 | 0.68 | 1372878_at   | Zfr        | zinc finger RNA binding protein                                                                                                         |
|      |      |         |         |      |              |            | inhibitor of kappa light polypeptide gene enhancer in B-cells, kinase complex-associated protein                                        |
| 0.00 | 0.03 | 319.45  | 469.52  | 0.68 | 1387115_at   | lkbkap     |                                                                                                                                         |
| 0.00 | 0.03 | 21.47   | 31.51   | 0.68 | 1398192_at   | NA         | NA                                                                                                                                      |
|      |      |         |         |      |              |            | similar to dJ202D23.2 (novel protein similar to C21ORF5 (KIAA0933))                                                                     |
| 0.00 | 0.04 | 134.07  | 196.56  | 0.68 | 1392495_at   | RGD1305534 |                                                                                                                                         |
| 0.00 | 0.04 | 863.38  | 1265.33 | 0.68 | 1376722_at   | Nup205     | nucleoporin 205                                                                                                                         |
| 0.00 | 0.04 | 129.72  | 189.94  | 0.68 | 1393230_s_at | RGD1308772 | similar to KIAA0564 protein                                                                                                             |
|      |      |         |         |      |              |            | Bartter syndrome, infantile, with sensorineural deafness (Barttin)                                                                      |
| 0.00 | 0.04 | 17.61   | 25.65   | 0.69 | 1393209_at   | Bsnd       |                                                                                                                                         |
| 0.00 | 0.04 | 84.27   | 122.70  | 0.69 | 1384901_at   | NA         | NA                                                                                                                                      |
|      |      |         |         |      |              |            | nuclear protein, ataxia-telangiectasia locus                                                                                            |
| 0.00 | 0.04 | 67.31   | 98.01   | 0.69 | 1391866_at   | Npat       |                                                                                                                                         |
| 0.00 | 0.04 | 12.68   | 18.40   | 0.69 | 1370515_x_at | Syt7       | synaptotagmin VII                                                                                                                       |
| 0.00 | 0.03 | 82.05   | 118.58  | 0.69 | 1384238_at   | Ttyh2      | tweety homolog 2 (Drosophila)                                                                                                           |
| 0.00 | 0.04 | 418.73  | 601.05  | 0.70 | 1388737_at   | Pbrm1      | polybromo 1                                                                                                                             |
| 0.00 | 0.04 | 86.24   | 123.52  | 0.70 | 1379305_at   | Vps13d     | vacuolar protein sorting 13D (yeast)                                                                                                    |
|      |      |         |         |      |              |            | methylenetetrahydrofolate dehydrogenase (NADP+ dependent) 1, methenyltetrahydrofolate cyclohydrolase, formyltetrahydrofolate synthetase |
| 0.00 | 0.04 | 645.62  | 922.20  | 0.70 | 1368181_at   | Mthfd1     |                                                                                                                                         |
| 0.00 | 0.04 | 756.13  | 1077.17 | 0.70 | 1389287_at   | NA         | NA                                                                                                                                      |
| 0.00 | 0.04 | 98.68   | 140.06  | 0.70 | 1377612_at   | Narg1      | NMDA receptor regulated 1                                                                                                               |
|      |      |         |         |      |              |            | potassium voltage-gated channel, shaker-related subfamily, member 5                                                                     |
| 0.00 | 0.04 | 14.91   | 21.05   | 0.71 | 1370268_at   | Kcna5      |                                                                                                                                         |
| 0.00 | 0.04 | 52.56   | 74.12   | 0.71 | 1368309_at   | Txnrd2     | thioredoxin reductase 2                                                                                                                 |
| 0.00 | 0.04 | 156.60  | 219.71  | 0.71 | 1377807_a_at | lqwd1      | IQ motif and WD repeats 1                                                                                                               |
|      |      |         |         |      |              |            | potassium inwardly-rectifying channel, subfamily J, member 3                                                                            |
| 0.00 | 0.04 | 14.78   | 20.73   | 0.71 | 1369742_at   | Kcnj3      |                                                                                                                                         |
|      |      |         |         |      |              |            | similar to Der1-like domain family, member 2                                                                                            |
| 0.00 | 0.04 | 194.77  | 271.44  | 0.72 | 1377763_at   | LOC687738  |                                                                                                                                         |
|      |      |         |         |      |              |            | splicing factor, arginine/serine-rich 2, interacting protein                                                                            |
| 0.00 | 0.04 | 408.83  | 563.09  | 0.73 | 1374154_at   | Sfrs2ip    |                                                                                                                                         |
| 0.00 | 0.04 | 904.56  | 1238.10 | 0.73 | 1374286_at   | NA         | NA                                                                                                                                      |
